# Supplementary material for: A human-specific switch of alternatively spliced AFMID isoforms contributes to TP53 mutations and tumor recurrence in hepatocellular carcinoma
Source: HighWire-hosted journal article supplement (doi:10.1101/gr.227181.117), 2018-02-15
Supplement: Supplemental_Fig_S2.pdf [file Supplemental_Fig_S2.pdf]

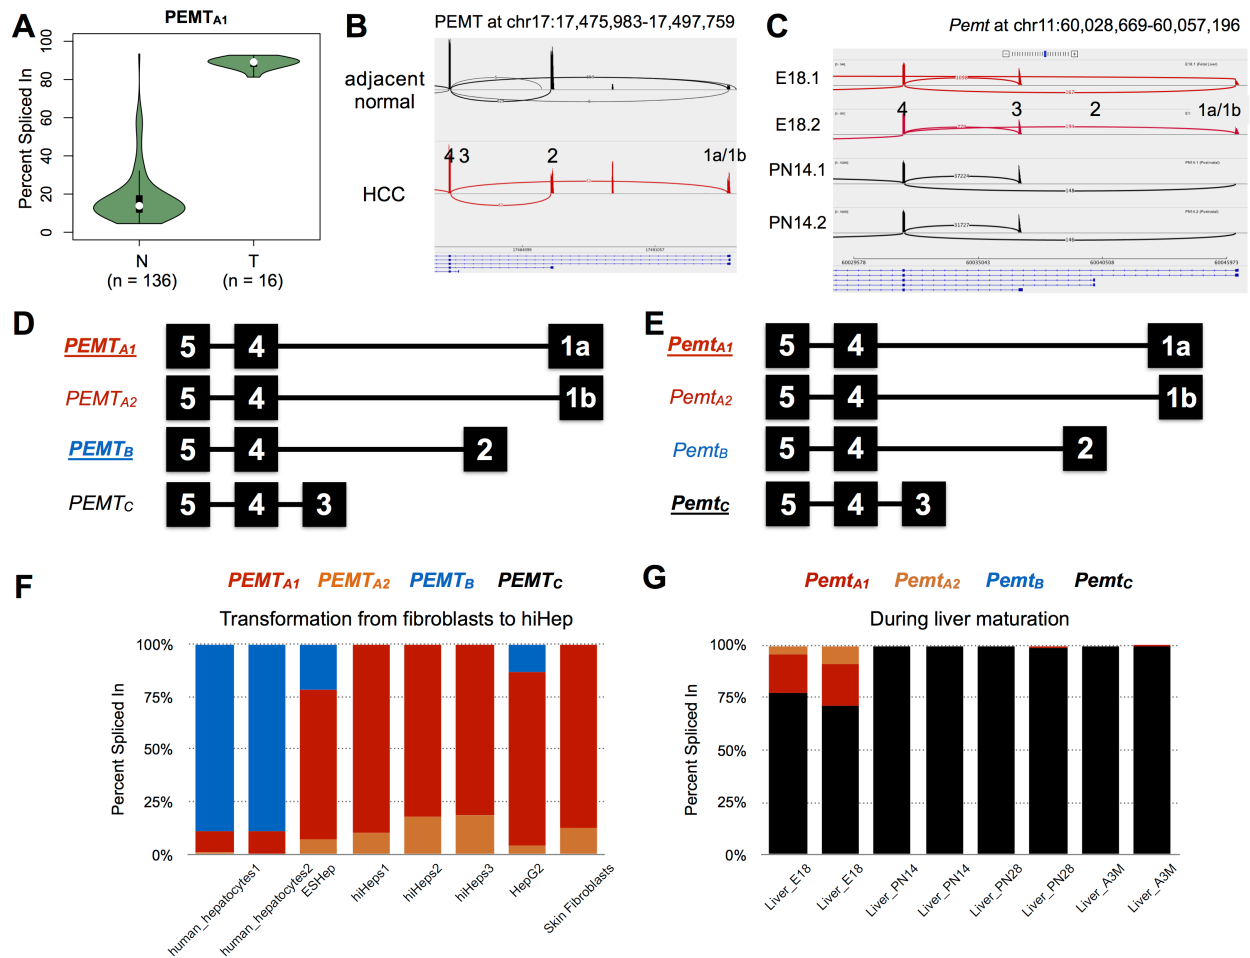

**Figure S2. The pre-mRNA splicing event of *PEMT* in HCCs, liver cancer cell lines, mice fetal livers, and hiHeps.** (A) The box plot shows the PSI distribution of *PEMT<sub>A2</sub>* isoform in 136 non-HCC liver samples and 16 liver cancer cell lines. (B) The sashimi plot shows the alignment results of one adjacent normal liver (black) and one HCC (red) at the region of the first three alternative exons and one constitutive exon (exon 4) of *PEMT*. (C) The sashimi plot shows the first four exons of *Pemt* in mice. E18 means fetal livers and PN14 mean post-natal 14 days. (D and E) The illustrating chart of *PEMT* in human HCCs and *Pemt* in mice fetal liver. In human HCCs, *PEMT* switched from *PEMT<sub>B</sub>* to *PEMT<sub>A1</sub>*. In mice fetal livers, *Pemt* increased the proportion of *Pemt<sub>A1</sub>*. (F and G) The stacked bar charts shows the compositions of *PEMT* isoforms in human hepatocytes, hiHeps, HepG2, and fibroblasts, and *Pemt* in mice fetal and adult livers.
