# Supplementary material for: A human-specific switch of alternatively spliced AFMID isoforms contributes to TP53 mutations and tumor recurrence in hepatocellular carcinoma
Source: HighWire-hosted journal article supplement (doi:10.1101/gr.227181.117), 2018-02-15
Supplement: Supplemental_Fig_S3.pdf [file Supplemental_Fig_S3.pdf]

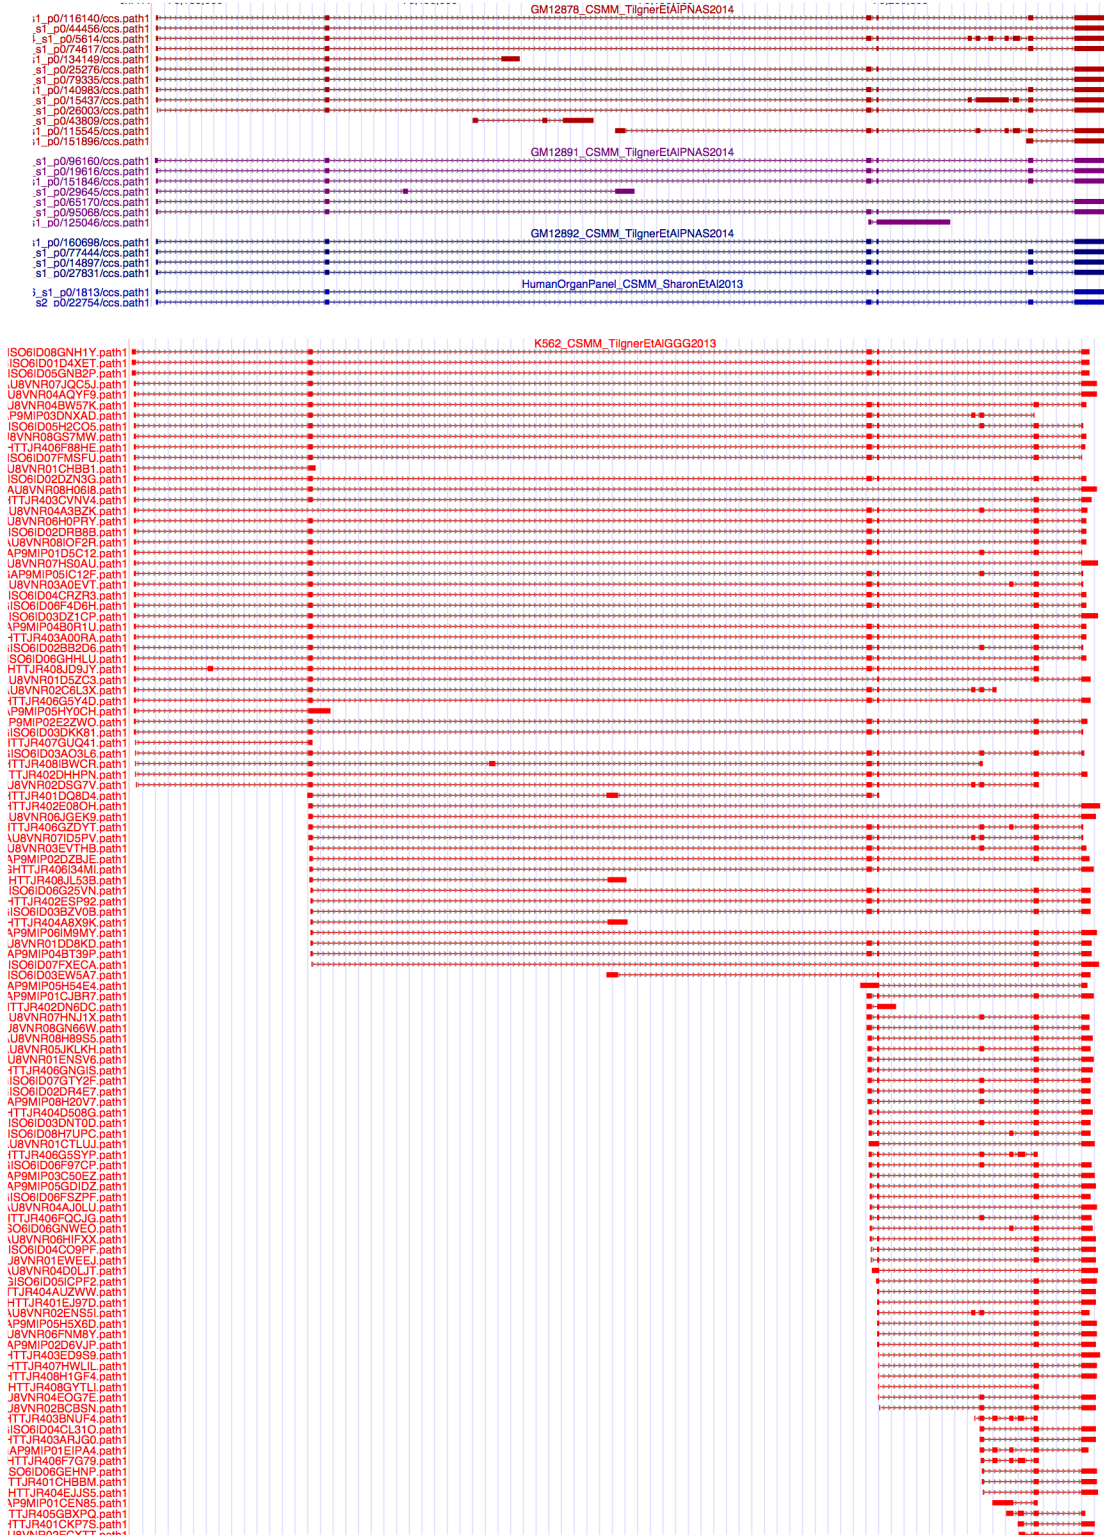

**Figure S3. Pacbio long reads revealed the complete structure of *AFMID<sub>SKIP</sub>* and *AFMID<sub>e6</sub>* isoforms in cell lines.** The five panels show the alignment results of long reads from GM12878, GM12891, GM12892, a human organ panel, and K562 cells.
