# Supplementary material for: A human-specific switch of alternatively spliced AFMID isoforms contributes to TP53 mutations and tumor recurrence in hepatocellular carcinoma
Source: HighWire-hosted journal article supplement (doi:10.1101/gr.227181.117), 2018-02-15
Supplement: Supplemental_Fig_S4.pdf [file Supplemental_Fig_S4.pdf]

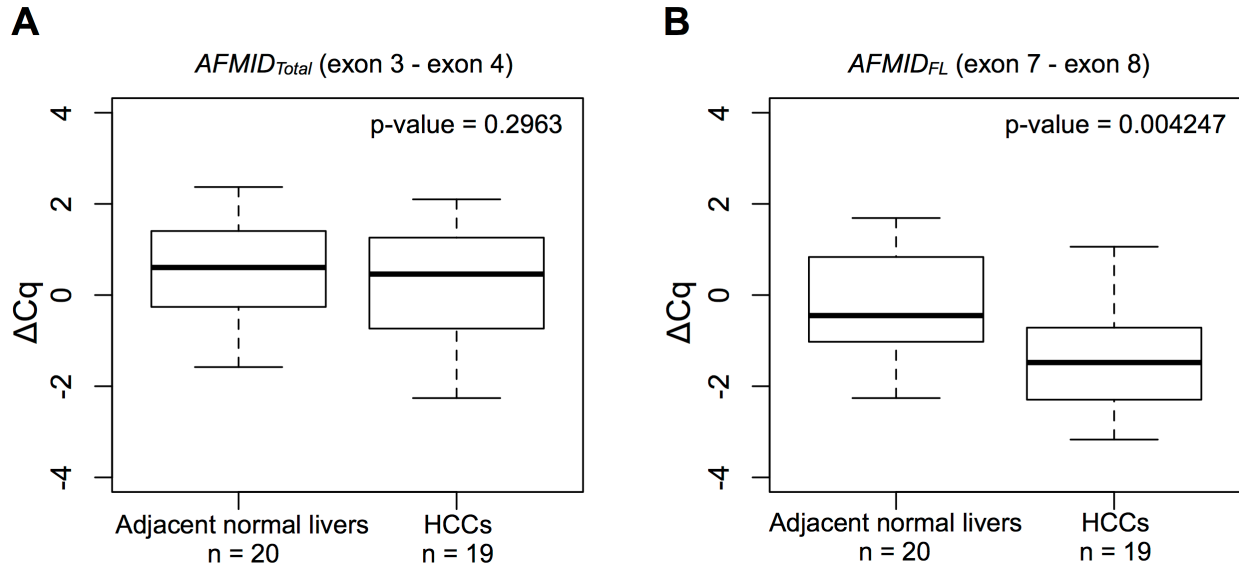

**Figure S4. Realtime PCR results for *AFMID*<sub>Total</sub> and *AFMID*<sub>FL</sub> in 20 adjacent normal livers and 19 HCCs.** *AFMID*<sub>Total</sub> was using the primer targeting exon 3 and exon 4 whereas *AFMID*<sub>FL</sub> was targeting exon 7 and exon 8.  $\Delta Cq$  values were normalized to *HPRT* by  $\text{mean}(Cq_{HPRT}) - \text{mean}(Cq_{AFMID})$ .
