# Supplementary material for: A human-specific switch of alternatively spliced AFMID isoforms contributes to TP53 mutations and tumor recurrence in hepatocellular carcinoma
Source: HighWire-hosted journal article supplement (doi:10.1101/gr.227181.117), 2018-02-15
Supplement: Supplemental_Fig_S5.pdf [file Supplemental_Fig_S5.pdf]

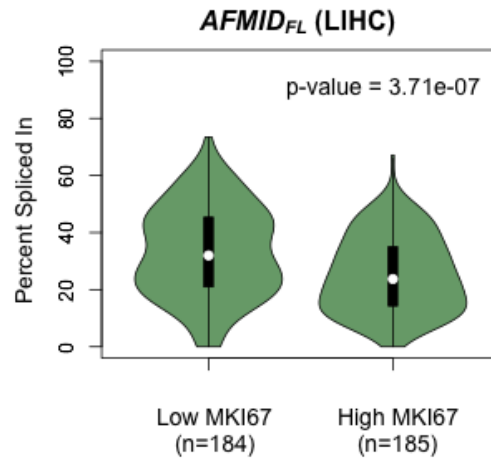

**Figure S5. The PSI distributions of *AFMID*<sub>FL</sub> in low- and high- MKI67 groups.** 369 HCC samples were divided into two groups (X-axis) by the median gene expression level of MKI67 (RNA-seq data). Y-axis shows the PSI values of *AFMID*<sub>FL</sub> in the 369 HCC samples from the TCGA-LIHC dataset.
