# Supplementary material for: A human-specific switch of alternatively spliced AFMID isoforms contributes to TP53 mutations and tumor recurrence in hepatocellular carcinoma
Source: HighWire-hosted journal article supplement (doi:10.1101/gr.227181.117), 2018-02-15
Supplement: Supplemental_Fig_S6.pdf [file Supplemental_Fig_S6.pdf]

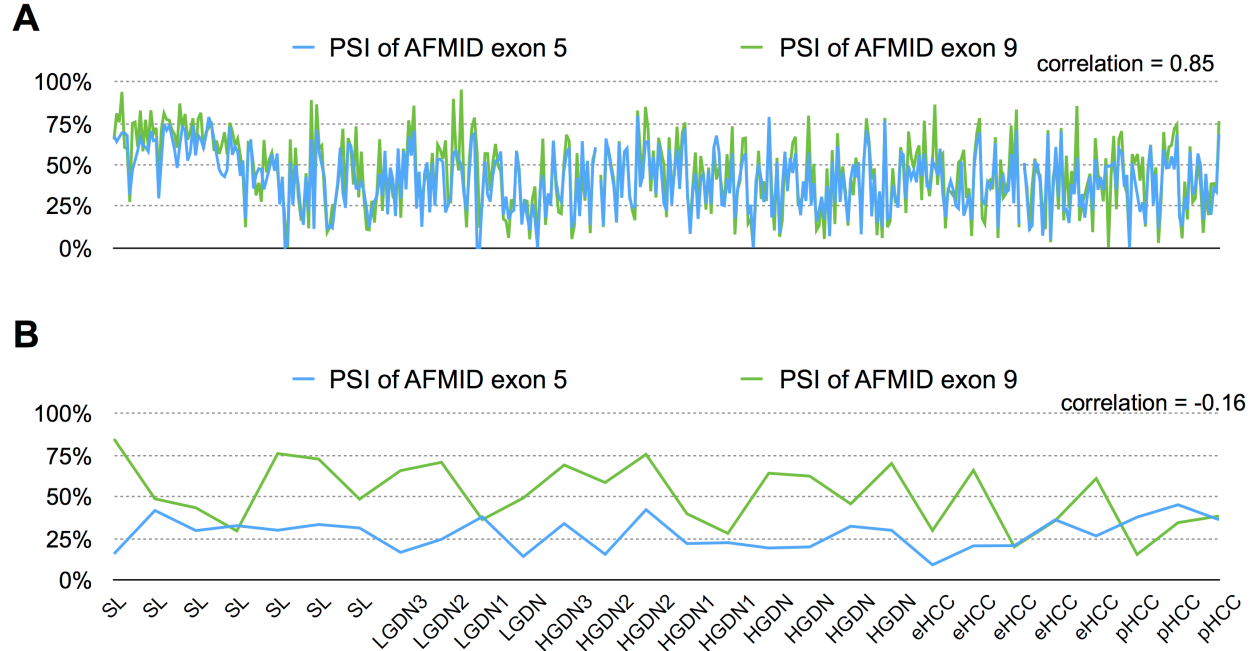

**Figure S6. The PSI distributions of *AFMID* exon 5 and exon 9 in TCGA's LIHC and the sequential-HCC-development datasets. (A)** The line chart shows the PSI distributions of exon 5 (blue) and exon 9 (green) in 50 adjacent normal and 369 HCCs samples of TCGA's LIHC dataset. **(C)** The line chart shows the PSI distributions of exon 5 (blue) and exon 9 (green) in the sequential-HCC-development dataset. SL means adjacent normal livers, LG means low-grade, HG means high-grade, eHCC means early HCCs, and pHCC means HCCs.
