# Supplementary material for: A human-specific switch of alternatively spliced AFMID isoforms contributes to TP53 mutations and tumor recurrence in hepatocellular carcinoma
Source: HighWire-hosted journal article supplement (doi:10.1101/gr.227181.117), 2018-02-15
Supplement: Supplemental_Fig_S7.pdf [file Supplemental_Fig_S7.pdf]

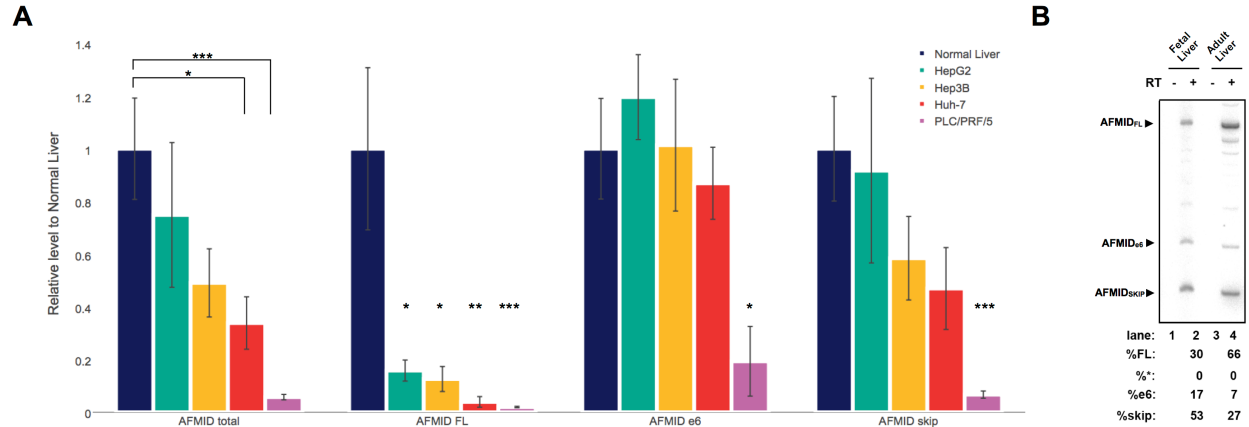

**Figure S7. Realtime PCR and hot RT-PCR results of *AFMID* isoforms.** (A) The bar charts show the relative expression level of overall *AFMID*, *AFMID*<sub>FL</sub>, *AFMID*<sub>e6</sub>, and *AFMID*<sub>SKIP</sub> in 2 normal liver samples, HepG2, Hep3B, Huh-7, and PLC/PRF/5 cell lines by realtime PCR. The error bars are standard error of means. Mean  $\Delta Cq$  values were determined by 3 technical replicates of 3 biological replicates and two sample t-test were used to determine statistical significance. The number of stars are showing the statistical significance to normal liver samples for a given cell line (\*:  $p < 0.05$ , \*\*:  $p < 0.01$ , \*\*\*:  $p < 0.001$ ). Error bars are based on standard error of mean. (B) The hot RT-PCR gel shows the isoform compositions of *AFMID* in human fetal and adult liver tissues.
