# Supplementary material for: A human-specific switch of alternatively spliced AFMID isoforms contributes to TP53 mutations and tumor recurrence in hepatocellular carcinoma
Source: HighWire-hosted journal article supplement (doi:10.1101/gr.227181.117), 2018-02-15
Supplement: Supplemental_Table_S1.xlsx [file Supplemental_Table_S1.xlsx]

## Sheet: Table S1
Table S1. Splicing events detected in 11 pairs of adjacent normal liver samples versus HCCs
Gene Symbol	Target Exon	N	T	Average ΔPSI	p-value
CEACAM1	19:43015727-43015780	11	11	32.4308	0.0029196
PEMT	17:17494844-17494910	11	11	31.4419	0.000161342
ST3GAL1	8:134511377-134511432	10	11	29.6874	0.0115159
SLC17A9	20:61594074-61594106	11	10	29.497	0.00070301
KIAA1551	12:32133811-32138891	11	11	29.0578	0.00037629
GPR126	6:142704896-142704980	11	10	28.2444	0.0077778
SLC17A9	20:61594086-61594106	11	10	27.7828	0.00121752
NUMB	14:73745988-73746132	11	11	26.7034	0.000163927
FN1	2:216236738-216237098	11	11	26.5009	5.688e-05
GLUL	1:182359631-182360309	10	11	25.5775	0.0065375
CREM	10:35468061-35468204	11	9	25.2199	0.00102434
PTPN3	9:112216775-112216854	11	11	24.6149	2.3983e-05
ASPH	8:62556503-62556560	11	11	24.4703	0.000141243
ADHFE1	8:67365944-67366293	11	9	24.4348	8.2193e-05
SLC25A16	10:70276840-70277022	11	11	23.2829	0.0071177
SLC25A16	10:70276840-70276942	11	11	23.2148	0.0073954
FN1	2:216236831-216237098	11	11	22.7119	3.8892e-07
MYO1B	2:192267357-192267444	11	11	22.3919	0.00032124
MYO1B	2:192265474-192265561	11	11	22.3764	0.0006595
CREM	10:35468061-35468204	11	10	22.285	0.00101952
COX20	1:245005245-245005360	11	11	21.9139	0.0026836
FN1	2:216245533-216245803	11	11	21.6417	0.0040639
DERL2_MIS12	17:5391515-5391909	10	11	20.6189	0.00085745
MBNL1	3:152164492-152164546	10	10	20.1284	0.00102186
FNBP1	9:132686122-132686275	11	10	19.9034	0.0004769
SLC39A14	8:22269549-22269719	11	11	19.3487	0.0143384
FLNB	3:58127623-58127656	10	11	18.9514	3.9075e-06
MAPKAPK5	12:112279130-112279274	10	11	18.8966	0.00057521
PREPL	2:44586635-44586889	9	11	18.8502	0.0127779
FN1	2:216237023-216237098	11	11	18.7435	2.0353e-06
PGPEP1	19:18474200-18480515	11	11	18.2942	0.003876
BIN1	2:127815048-127815177	11	11	18.1651	0.0130962
ATXN1	6:16753463-16753578	9	9	18.1449	0.0071012
SNRPA1	15:101826418-101826498	11	11	18.03	0.00121969
NRL_DCAF11	14:24584414-24584502	11	9	17.9681	0.0155432
CREM	10:35468061-35468204	11	10	17.7892	0.004236
PGPEP1	19:18474200-18474240	11	11	17.7352	0.0042173
CREM	10:35467816-35467914	11	10	17.6517	0.0037956
CTNNB1	3:41281309-41281312	11	11	17.6276	2.031e-05
CREM	10:35467799-35467914	11	10	17.5496	0.0038596
FAM115A	7:143599053-143599119	9	11	17.3431	0.0130407
GPR116	6:46822451-46822518	10	9	17.2922	0.008823
NFE2L1	17:46128143-46128181	9	10	17.2652	0.0021371
MLH3	14:75505042-75505115	9	10	17.172	0.021244
VEGFB	11:64004891-64004992	11	10	16.9797	2.1142e-05
SMC5	9:72961520-72961565	10	10	16.7875	0.0110039
CARKD	13:111274562-111274713	11	11	16.6845	8.3241e-05
GPRC5C	17:72436185-72436966	11	11	16.5928	0.0026576
L3HYPDH_RP11-701B16.2	14:59950397-59950526	10	11	16.5892	0.0083222
PCBP2_RP11-793H13.8	12:53861588-53861627	11	11	16.3865	2.0472e-05
CTC-228N24.3	5:127418426-127418661	11	10	16.3542	0.0057368
URI1	19:30462099-30462134	11	11	16.2392	0.0030023
NABP2_SLC39A5	12:56624614-56624657	11	10	16.2093	0.024275
SUV39H2_RP11-398C13.6	10:14923498-14923644	9	10	16.1566	0.00042193
ITFG1_PHKB	16:47497792-47497904	11	11	16.0239	0.0046444
PCBP2_RP11-793H13.8	12:53861588-53861627	11	11	15.9938	3.5649e-05
ZFAND1	8:82629483-82629523	11	11	15.9521	0.0058991
MAPKAPK5-AS1_AC003029.1	12:112279130-112279487	10	11	15.8283	0.00149639
CCNL2	1:1328169-1328183	11	11	15.8259	0.0125425
RNASEH1_RNASEH1-AS1	2:3607037-3607319	9	9	15.5888	0.025877
SNORD50_VPS29	12:110937339-110937351	11	11	15.5675	0.013018
GAS5_GAS5-AS1	1:173833442-173834420	11	11	15.5602	0.040803
CYP4A11	1:47400124-47400231	11	11	15.5295	0.0092032
DNAJC19	3:180704730-180704810	11	11	15.4644	1.5066e-08
GOLGA4	3:37402733-37402796	11	11	15.4404	0.00077978
ASPH	8:62557158-62557191	11	10	15.4317	0.0037389
UGP2	2:64083463-64083567	11	11	15.4109	0.0066228
SNORD57_SNORD56_NOP56_SNORA51_SNORD86	20:2636680-2636860	11	11	15.4047	0.030943
AP000295.9_IFNAR2	21:34634865-34635097	11	11	15.3958	0.0191399
NCOA2	8:71056876-71057083	11	11	15.3426	0.0003576
GAS5_SNORD78_GAS5-AS1	1:173833842-173834420	11	11	15.2775	0.0188371
NCOR2	12:124811954-124812092	11	10	15.2529	0.0078435
FAM115A	7:143599053-143599166	10	11	15.1183	0.0128029
PREPL	2:44586635-44586889	9	11	15.0943	0.039097
NABP2_SLC39A5	12:56624614-56624657	11	10	15.09	0.026285
ITFG1_PHKB	16:47497809-47497904	11	11	15.0038	0.024635
CEACAM1_LIPE-AS1	19:43015727-43015780	11	11	14.8707	0.0054649
NDUFAF1	15:41694341-41694644	11	11	14.7959	0.00186223
RGS14	5:176798475-176798590	11	11	14.7784	0.00173586
IMMP1L	11:31484718-31484852	11	11	14.7502	0.035297
ZRANB2_ZRANB2-AS1	1:71531360-71531435	11	11	14.7279	0.000155888
MRPL43_SEMA4G_RP11-108L7.4	10:102740739-102740754	11	11	14.7051	0.00047868
A1CF_ASAH2B	10:52573798-52573822	11	11	14.5405	0.00086084
FLNA	X:153585618-153585642	11	9	14.5018	0.032542
RP11-463D19.2_STAU2	8:74651990-74652103	11	11	14.4997	7.747e-05
IGF1	12:102811732-102811781	11	9	14.4488	0.00060345
CCNL2	1:1328058-1328183	11	11	14.4145	0.022799
MYL6_RP11-977G19.5_SMARCC2	12:56558086-56558152	9	9	14.2277	0.043183
COX20	1:245005245-245005360	11	11	14.1876	0.0030171
XAF1	17:6665204-6665356	10	10	14.1321	0.023575
ZNF114_CARD8	19:48752779-48752890	10	10	14.1319	0.00161567
ST5	11:8751496-8752756	9	10	14.0447	0.027583
CEP290	12:88448116-88448190	9	11	14.0424	0.03684
CCNL2	1:1326245-1328183	11	11	13.9407	0.020845
E2F5_C8orf59	8:86131551-86131592	11	11	13.8727	0.00106136
AKIP1_ST5	11:8933999-8934080	11	11	13.823	0.00106361
RP11-297A16.2_CREM	10:35467816-35467914	11	9	13.8059	0.026639
WSB1	17:25634769-25636125	11	11	13.7949	0.04946
AFMID	17:76200908-76200981	11	11	13.7716	0.00169787
RTEL1_RTEL1-TNFRSF6B	20:62326833-62327003	9	9	13.6192	0.035239
CBWD2	2:114228609-114228666	11	11	13.6137	0.0154778
ADD3	10:111892062-111892158	11	11	13.6093	0.0146434
NTAN1_PDXDC1	16:15141853-15141956	11	11	13.5781	0.00162444
RP11-468E2.5_PSME1_EMC9	14:24608823-24608998	11	11	13.5702	0.0075378
TSSC1	2:3341787-3341920	10	11	13.4874	0.014241
CYP4A11	1:47400124-47400231	11	11	13.3872	0.00151644
NSMF	9:140347632-140348272	11	10	13.3329	0.024985
SLC7A2	8:17359765-17359811	11	10	13.3078	0.030456
KHK_EMILIN1	2:27317344-27317479	11	11	13.2296	0.0025987
MBD1	18:47797838-47797910	10	10	13.2152	0.0171604
RP11-463D19.2_STAU2	8:74651990-74652103	10	11	13.1379	0.000138801
CDC14B	9:99271954-99272071	11	11	13.0424	0.0097206
DCAF5	14:69619481-69619660	11	10	13.0366	0.0089976
DIS3	13:73354983-73355141	11	10	13.0165	0.031257
AD000671.6_PSENEN_U2AF1L4_AC002398.9	19:36235593-36235639	9	10	13.0028	0.0147243
RRNAD1	1:156703800-156703844	11	11	12.9968	0.00076301
UGP2	2:64083439-64083567	11	11	12.9797	0.00061908
POC1B	12:89853414-89853495	10	11	12.9501	0.034679
CYP4A11	1:47399751-47399803	11	11	12.8856	0.0084967
ZHX1_ZHX1-C8ORF76	8:124265561-124268411	11	11	12.8754	0.010855
PCDH12_RNF14	5:141350268-141350442	11	11	12.7502	0.0005581
ACMSD_CCNT2-AS1	2:135601934-135602041	11	11	12.7095	5.7791e-05
SLC7A9	19:33359465-33359551	11	11	12.6942	0.025439
RAP2C-AS1_MBNL3	X:131518690-131518726	11	11	12.6889	0.040058
PDZK1	1:145763569-145763632	11	11	12.6649	1.8715e-06
E2F5_C8orf59	8:86131464-86131592	11	11	12.6491	0.0138
IMMP1L	11:31477806-31477933	11	11	12.5812	0.033258
SPPL2A	15:51018269-51018323	11	11	12.5768	0.031003
RP11-517H2.6_FGFR1OP	6:167426995-167427055	11	11	12.5061	0.025577
TMEM175_GAK	4:941903-942403	11	10	12.5029	0.020924
ST3GAL1	8:134511377-134511432	10	11	12.4841	0.029281
SPPL2A	15:51018269-51018517	11	11	12.4193	0.034339
MR1	1:181021370-181021646	10	10	12.4043	0.029155
LRIF1_RP11-96K19.2	1:111493909-111495437	11	10	12.4002	0.029256
TRIP12	2:230725121-230725247	11	11	12.3992	0.0051152
UGP2	2:64083439-64083567	11	11	12.3308	0.00119714
RPP30	10:92654648-92655240	11	11	12.3161	0.0075017
SLC37A3	7:140045668-140045770	10	9	12.2833	0.0141585
TARS2	1:150468957-150469104	11	11	12.1961	0.0105772
NABP2_SLC39A5	12:56625249-56625345	11	10	12.1912	0.0131848
SDCCAG3	9:139303450-139303519	11	11	12.1799	0.0045759
TOR1AIP2	1:179834570-179834989	11	11	12.1601	0.00069803
NASP	1:46072992-46074009	11	11	12.0804	0.0049762
CCNL1_Y_RNA	3:156874724-156874799	10	11	12.0711	0.0070613
RP11-156E8.1_EFCAB2	1:245180543-245180628	10	11	12.0419	0.038537
WASH3P	15:102512785-102512798	11	10	11.9147	0.044578
TMEM45A	3:100238305-100238452	11	9	11.8778	0.005321
ASGR2	17:7017629-7017717	11	11	11.8124	0.004024
SEPT6	X:118759297-118759342	11	9	11.8007	0.033883
ARID4B	1:235377083-235377341	10	11	11.7244	0.025237
SMARCB1	22:24134054-24134081	11	11	11.6319	0.00028411
MED4	13:48669089-48669195	11	11	11.6134	0.00101779
BIN1	2:127815048-127815177	11	11	11.5665	0.0070842
PCM1	8:17840741-17840798	11	11	11.4922	0.0089629
SLC38A9	5:55000149-55000262	10	11	11.4242	0.005118
MPHOSPH8	13:20244979-20245104	11	10	11.4163	0.0084795
HDHD2_IER3IP1	18:44662709-44662820	11	11	11.3731	0.0009196
PPP1R12A	12:80199371-80199548	10	11	11.3239	0.024417
MIR4685_HPS1	10:100193696-100193739	11	11	11.3161	0.033284
CDHR5	11:618598-619180	11	11	11.3118	0.00185964
NCBP2_NCBP2-AS1	3:196668805-196669240	11	10	11.2918	0.023137
NUMA1	11:71723940-71727306	11	11	11.2622	0.0027378
FAM221A_AC006026.13	7:23724117-23724291	11	11	11.2618	0.0120435
XAF1	17:6663724-6663920	10	10	11.2261	0.0045829
FN1	2:216245533-216245803	11	11	11.2107	0.004102
PAN2	12:56717966-56717969	10	10	11.1492	0.037684
HNF4A	20:43057097-43057127	11	11	11.1283	7.729e-05
FAM227A_CBY1	22:39061550-39061690	11	11	11.1276	0.0099991
ATG9A	2:220093731-220093896	9	9	11.0812	0.037081
MGLL	3:127541151-127541926	11	10	11.0661	0.0063625
PICALM	11:85689112-85689136	11	11	11.0203	0.000178437
SLMAP	3:57911571-57911661	11	11	11.0128	0.029524
KLC1_RP11-73M18.2	14:104153417-104153548	11	11	11.0034	0.041035
N6AMT1	21:30252191-30252275	9	11	10.9984	0.0188208
CANT1	17:76996181-76996352	10	11	10.953	0.03216
N4BP2L1	13:32978457-32978534	11	10	10.9321	0.0077
FBXO4	5:41939542-41939718	11	11	10.864	0.0024838
IMMP1L	11:31482172-31482261	11	10	10.8639	0.043836
CAMLG	5:134079676-134079742	11	10	10.8482	0.0161985
N6AMT2	13:21305979-21306260	9	9	10.8376	0.0038814
BIN1	2:127815048-127815177	11	11	10.8266	0.0136193
SNORD12_ZFAS1_SNORD12B	20:47897439-47897501	11	11	10.6687	0.020004
PUM2	2:20478343-20478580	11	11	10.636	0.019762
PROS1	3:93647545-93647641	11	11	10.5589	0.020376
LPHN2	1:82452943-82452972	11	11	10.5353	0.031005
ITFG1_PHKB	16:47497792-47497904	11	11	10.4739	0.0133447
KLC1_APOPT1_RP11-73M18.2_BAG5	14:104037959-104038157	11	10	10.4732	0.022784
LRRFIP2	3:37217308-37217550	11	11	10.4687	0.029237
EFCAB14_EFCAB14-AS1	1:47154024-47154216	11	11	10.443	0.023225
LGALS8_RP11-385F5.4	1:236706214-236706340	11	11	10.4388	0.047542
MYO1B	2:192267357-192267444	11	11	10.3912	0.00036077
CAPN7	3:15282959-15283095	11	11	10.3739	0.0084794
NARG2	15:60760361-60760521	10	11	10.3668	0.0157574
GAS5_SNORD78	1:173834608-173834647	11	11	10.3096	0.043157
PCDH12_RNF14	5:141350268-141350442	11	10	10.3061	0.0137388
SLC38A9	5:55000149-55000262	10	11	10.3031	0.0050403
RFC1	4:39308321-39308324	11	11	10.2983	0.036898
ADAL	15:43639213-43639294	9	10	10.2384	0.02086
P4HA1	10:74803644-74803715	11	11	10.237	0.0095639
ZNF114_CARD8	19:48752779-48753007	10	11	10.2102	0.027355
ECHDC2	1:53370705-53370762	11	11	10.1942	0.00042254
ERBB2IP	5:65370851-65371058	11	11	10.1801	0.0068404
STX16-NPEPL1_STX16	20:57234678-57234690	10	11	10.1703	0.020463
STRA13	17:79977183-79977257	11	11	10.1495	0.0119573
TMEM175_GAK	4:941496-941680	11	10	10.1421	0.04296
ASPH	8:62559308-62559437	11	11	10.131	0.0053224
GLYCTK-AS1_GLYCTK	3:52327190-52327208	11	11	10.0608	0.00139958
NRL_DCAF11	14:24584590-24584935	11	11	10.059	0.0078958
CCDC126	7:23643704-23643898	10	11	-10.0125	0.033961
SCO2_TYMP	22:50967564-50967767	11	11	-10.0156	0.018258
NFYC	1:41236068-41236380	11	11	-10.0324	0.010103
ARHGEF7	13:111862218-111862349	10	11	-10.0352	0.037638
MOCS1	6:39876815-39876878	11	11	-10.0808	0.0113238
ARHGEF7	13:111862218-111862349	10	11	-10.0821	0.005559
SEC31A	4:83783686-83783725	11	11	-10.1028	0.0032587
N4BP2L1	13:32978339-32978408	11	10	-10.1449	0.0081764
ZZZ3	1:78047573-78047576	10	11	-10.1589	0.024996
DEF8	16:90015824-90015921	11	11	-10.1758	0.021697
ALKBH2	12:109530592-109530742	11	11	-10.2043	0.0086214
FAM107B	10:14595320-14595386	11	11	-10.206	0.047737
RAP2C_RAP2C-AS1	X:131352259-131352369	10	10	-10.2116	0.0081379
MIR4685_HPS1	10:100190887-100191048	11	11	-10.214	0.046905
NRL_DCAF11	14:24586125-24586180	11	9	-10.2537	0.0159045
VEGFA	6:43749692-43749824	11	11	-10.2654	0.0088427
UPP1	7:48139266-48139384	11	11	-10.282	0.0112236
ASPH	8:62531536-62531578	11	11	-10.291	0.03564
LRP5	11:68213040-68213154	11	11	-10.2995	1.5176e-06
NR1I3	1:161206248-161206388	11	10	-10.349	0.046899
UAP1	1:162562524-162562572	11	11	-10.3516	0.022201
ABLIM1	10:116207779-116207785	10	10	-10.3691	0.0124597
MANEAL	1:38265238-38265515	9	9	-10.3727	0.045759
SCO2_TYMP	22:50967924-50968183	11	11	-10.4252	0.0153413
RP4-798P15.3_RP11-568K15.1	1:178001564-178001630	9	11	-10.4313	0.0052401
ZCCHC7	9:37126308-37126939	10	11	-10.4355	0.033744
MBD1	18:47800555-47800723	11	11	-10.4365	0.033637
MLPH	2:238428552-238428672	10	9	-10.4565	0.039742
PRMT2	21:48056350-48056459	11	11	-10.4866	0.0156243
INO80E	16:30012734-30012851	11	11	-10.4918	0.0048233
RAB40B	17:80616366-80616438	11	11	-10.5033	0.00064314
MAGIX	X:49022412-49022427	11	10	-10.5698	0.0180172
ANKHD1-EIF4EBP3_ANKHD1	5:139866542-139866590	10	11	-10.5741	0.0061026
AKAP7	6:131602669-131603538	10	11	-10.5994	0.0030199
PDCD10	3:167443188-167443261	11	11	-10.6433	0.00023894
BAIAP2	17:79084713-79084759	11	10	-10.6495	0.0194025
PRDM2	1:14095612-14095668	10	9	-10.6752	0.028743
TATDN1	8:125530982-125531058	11	11	-10.7017	0.0154611
APOC1P1	19:45430866-45431187	11	11	-10.7624	0.0020842
CCDC50	3:191092850-191093378	11	11	-10.8265	0.00131759
USF2	19:35760705-35760906	11	11	-10.8407	0.0198758
SREK1	5:65454636-65454760	11	11	-10.8487	0.047042
TPD52L2	20:62507168-62507228	11	11	-10.8499	0.0064362
SETD4	21:37429681-37429775	9	11	-10.8602	0.045605
SORBS1	10:97135729-97135813	11	11	-10.8617	0.00021583
PHACTR4	1:28784342-28784370	10	9	-10.8952	0.0144002
KANSL3	2:97267852-97268075	11	10	-10.9105	0.021762
FIP1L1	4:54306748-54306775	11	11	-10.9143	0.0045986
HMGB1	13:31035775-31035825	11	10	-10.9268	0.00042089
AFMID	17:76202026-76202131	11	11	-10.9295	3.8855e-05
UBE2D4_URGCP	7:43967612-43967710	10	10	-10.9319	0.023178
SNHG3_RCC1_SNORA73B	1:28843236-28843365	10	10	-10.938	0.0026787
ACP1	2:272191-272305	11	11	-10.9497	0.048441
HDHD2_IER3IP1	18:44662672-44662709	11	11	-10.9538	0.00121715
NSMF	9:140349690-140349759	11	9	-10.9752	0.0083979
DCAF6	1:167992225-167992285	11	11	-11.0548	0.000139639
EXOC7	17:74086409-74086478	11	11	-11.068	0.00082406
CASP9	1:15833393-15833628	11	10	-11.0822	0.032783
PSD4	2:113955323-113955326	11	10	-11.1136	0.00157684
SORBS2	4:186560030-186560189	11	10	-11.1246	0.037975
PCSK6	15:101971524-101971668	11	10	-11.126	0.025257
NIPA2	15:23033893-23034006	11	11	-11.1755	0.005483
CELF1	11:47500492-47500504	11	11	-11.2056	0.0049962
EXOC7	17:74086409-74086562	11	11	-11.2066	0.0001426
MBNL1	3:152165408-152165562	10	10	-11.222	0.0182755
ODF3B	22:50969998-50970131	11	10	-11.2271	0.008519
GUSB	7:65439905-65440058	11	11	-11.3273	0.0098173
UPP1	7:48141420-48141579	10	11	-11.3459	0.0165154
THOC2	X:122757494-122757560	10	10	-11.3509	0.021556
RNF216P1_RBAK-RBAKDN	7:5024540-5024592	9	11	-11.3533	0.0120185
ADORA2A-AS1_SPECC1L-ADORA2A_ADORA2A	22:24867735-24867863	11	11	-11.3861	0.0186597
NRL_DCAF11	14:24584751-24584958	11	11	-11.3994	0.0166844
TAZ	X:153648043-153648085	10	11	-11.4051	0.049764
SORBS2	4:186556508-186556565	11	10	-11.4071	0.023996
TMEM56-RWDD3_RP11-57H12.3_RWDD3	1:95709766-95710254	11	11	-11.4872	0.0062406
KIF12	9:116859580-116859716	11	10	-11.5562	0.035643
CAMK2D	4:114376881-114376977	11	11	-11.5959	0.034043
HDDC2_TPD52L1	6:125574862-125574901	11	11	-11.6067	0.0053412
RAPH1	2:204341798-204341879	11	9	-11.6749	0.026385
DCAF8_DCAF8	1:160231074-160231148	11	11	-11.703	2.2799e-05
HGSNAT	8:43051572-43051683	10	10	-11.7572	0.00040362
SLC2A8	9:130164835-130165032	11	11	-11.7747	0.0175771
ECHDC2	1:53370705-53370762	11	11	-11.8388	0.003819
RNF146	6:127607194-127607322	11	11	-11.878	5.9934e-05
TMEM126B_DLG2	11:85342188-85342360	11	11	-11.941	0.0042404
SIGIRR	11:406842-406993	11	11	-11.9696	0.0075205
RP1-184J9.2_KDM1A	1:23370919-23370979	10	11	-11.9735	0.024956
ATG9A	2:220093155-220093207	9	11	-11.9752	0.0181782
RFC1	4:39308211-39308321	11	11	-11.9827	0.033597
VEGFA	6:43748468-43748540	11	11	-11.9831	0.020282
RP1-309K20.6_CPNE1	20:34246851-34246904	11	11	-11.997	0.011362
SCO2_TYMP	22:50967924-50968160	11	11	-12.0231	0.009203
FLNB	3:58127584-58127623	10	11	-12.0368	0.00021507
TUSC3	8:15615299-15615364	10	9	-12.0562	0.0125174
RAPH1	2:204341798-204341879	11	9	-12.0646	0.0026385
UPP1	7:48142893-48143008	10	11	-12.0744	0.046498
RNF146	6:127607194-127607322	11	11	-12.0755	5.5959e-05
GPCPD1	20:5566839-5566915	10	9	-12.0823	0.0177627
POSTN	13:38145505-38145595	9	10	-12.1847	0.03308
SRPK2	7:104766694-104766787	11	11	-12.2082	0.032979
PROZ	13:113813512-113813578	11	9	-12.2142	0.0036389
FIP1L1	4:54245239-54245284	11	11	-12.2488	0.033123
CASK	X:41414852-41414888	11	9	-12.3162	0.015562
RP4-583P15.14_RP4-583P15.15_LIME1	20:62369950-62370284	11	11	-12.3288	0.048484
CD27_CD27-AS1	12:6559506-6560634	11	10	-12.4293	0.0279
SLC17A4	6:25773740-25773902	9	10	-12.4704	0.030575
DLEU2_DLEU1	13:50657277-50657330	11	11	-12.4724	0.043137
CCDC51	3:48476425-48476546	11	10	-12.4892	0.00064477
CHID1	11:914744-914746	11	11	-12.7211	0.0071219
CCNT2	2:135703458-135703545	10	11	-12.763	0.0028558
TRIP10	19:6746039-6746207	9	11	-12.7729	0.002478
LARP1B	4:129083348-129083472	11	9	-12.7891	0.045005
ADAM15	1:155034379-155034451	11	11	-12.7918	0.0139409
EVI5	1:93128976-93129009	9	9	-12.8138	0.0160153
WDR59	16:74933595-74933652	11	11	-12.8209	0.0045573
ENDOV_CTD-2047H16.4	17:78395627-78395762	9	9	-12.8577	0.0071825
FRA10AC1	10:95431798-95431846	11	11	-13.0659	0.0091166
NIPA2	15:23033277-23033413	11	11	-13.0706	0.0041621
DOLPP1	9:131848417-131848546	11	10	-13.126	0.0059228
ABLIM3_AC012613.2_RP11-331K21.1	5:148622053-148622101	11	11	-13.1949	6.0236e-05
KRAS_LYRM5	12:25368370-25368494	11	11	-13.2089	0.0057797
BIN1	2:127808729-127808819	11	11	-13.2125	0.0047389
ZFAND1	8:82630416-82630459	11	11	-13.2421	0.02246
METTL23_JMJD6	17:74723260-74723295	11	11	-13.2892	0.0089828
MAP4K3	2:39535083-39535146	10	11	-13.3972	0.0156382
ATP2C1	3:130613433-130613619	9	11	-13.4019	0.025236
ERLIN1	10:101945660-101945718	11	11	-13.4202	0.00150404
SORBS1	10:97110965-97111133	11	11	-13.4454	0.044083
FAM211B_GGT1_SNRPD3	22:24984646-24985233	11	11	-13.4536	0.031457
PI4KB	1:151282686-151282731	11	11	-13.4826	0.0127377
SLC25A39	17:42399896-42399920	11	11	-13.5308	1.5707e-06
CYP4A11	1:47399617-47399751	11	11	-13.5479	0.0187184
FBXO44	1:11718589-11718685	11	11	-13.5931	0.045096
UGP2	2:64084962-64085070	11	11	-13.6278	0.00068211
UGP2	2:64084962-64085070	11	11	-13.6347	0.00051852
SLC17A4	6:25773740-25773902	10	10	-13.6759	0.0097766
C16orf13	16:685611-685774	11	11	-13.8032	0.0105565
SLC39A14	8:22265822-22266009	11	11	-13.9114	0.0030391
CDC14B	9:99277930-99278074	11	11	-13.9795	0.00150473
CARKD	13:111279785-111279894	11	11	-13.9916	0.00165995
TBRG1	11:124496368-124496505	11	11	-14.1365	0.0042449
ATXN2	12:111902465-111902519	11	10	-14.1948	0.043337
MPDZ	9:13147546-13147657	11	9	-14.2177	0.00157982
PBX3	9:128724380-128724493	10	11	-14.2632	0.0020624
AGXT2	5:35032836-35032930	10	9	-14.4977	0.0029409
CFHR2	1:196918565-196918779	11	11	-14.4993	0.00037918
CFHR2	1:196918584-196918779	11	11	-14.5025	0.0003619
DIS3	13:73355426-73355494	11	10	-14.5294	0.028357
RP1-309K20.6_CPNE1	20:34246851-34246936	11	11	-14.5452	0.036402
NUMB	14:73749066-73749213	10	11	-14.5469	0.00181773
CFHR2	1:196918746-196918779	11	11	-14.5875	0.00051601
CYP4F3	19:15754716-15754861	11	11	-14.7269	0.0199772
AFMID	17:76201520-76201599	11	11	-14.7735	2.0118e-07
ZBTB7B	1:154986490-154986569	10	11	-14.787	0.00184322
MACF1	1:39946591-39946702	11	11	-14.8089	0.0051448
ARAP1-AS2_ARAP1	11:72415196-72415379	11	10	-14.8666	0.0193751
SLC17A3	6:25862023-25862257	11	10	-14.9424	0.0014805
SIRPA	20:1902040-1902358	11	10	-14.984	0.034402
SORBS1	10:97174250-97174412	10	10	-15.0132	0.032879
UBXN2B	8:59325857-59325930	10	10	-15.169	0.0105381
SORBS1	10:97174250-97174619	10	10	-15.1972	0.035459
F7	13:113769973-113770114	11	10	-15.2066	0.03692
NUDT7	16:77769724-77769883	11	11	-15.3251	0.00191521
POSTN	13:38144716-38144806	10	9	-15.4044	0.000138686
KIAA1551	12:32123122-32123290	11	11	-15.4162	0.00170257
LRRFIP2	3:37163125-37163182	11	11	-15.4203	0.0058178
ABCG5	2:44053520-44053660	11	11	-15.4225	0.0057611
FNBP1	9:132678244-132678259	11	10	-15.456	0.009815
SULT1A2_CCDC101	16:28606687-28606785	11	10	-15.5233	0.0193985
KHK_EMILIN1	2:27317667-27317802	11	11	-15.5714	0.0053551
CARKD	13:111279785-111279894	11	11	-15.6475	0.0003422
TMBIM6	12:50135898-50136063	11	11	-15.659	1.0497e-07
YIPF1	1:54354916-54355136	11	11	-15.7114	0.0058379
RNF146	6:127607194-127607322	11	11	-15.7152	3.8068e-05
PCBP2_RP11-793H13.8	12:53862560-53862563	11	11	-15.7563	3.8766e-05
CARKD	13:111279785-111279894	11	11	-15.7889	0.0001954
SLC2A8	9:130159654-130159817	11	10	-15.8227	0.038798
STOML1	15:74281448-74281598	9	11	-15.8391	0.0048638
NIPA2	15:23027800-23027922	11	11	-16.0472	0.0044847
ISOC2	19:55967002-55967212	11	11	-16.1321	0.028203
MICU1	10:74267912-74268027	11	11	-16.2171	0.0106024
MIR4685_HPS1	10:100190887-100191048	10	11	-16.3108	0.025203
PMS2P5_Y_RNA	7:74312515-74312628	10	11	-16.3481	0.0110632
ARFGAP2	11:47194976-47195033	11	10	-16.3731	0.013944
AFMID	17:76198783-76198832	11	11	-16.4929	5.5709e-05
APOC1P1	19:45431051-45431187	11	11	-16.5085	0.003755
NUMB	14:73749066-73749213	11	11	-16.5252	0.00066237
ECHDC2	1:53370705-53372283	11	11	-16.5449	0.00124444
AFMID	17:76201683-76201834	11	11	-16.5956	2.0233e-07
RPS24	10:79799958-79799983	11	11	-16.614	1.1777e-06
RPS24	10:79799961-79799983	11	11	-16.6163	1.1816e-06
RRNAD1	1:156703844-156704285	11	10	-16.6526	0.0057391
STRA13	17:79977183-79977257	11	11	-16.7362	0.002677
SLC29A1	6:44193797-44193904	11	11	-16.8623	0.00034233
MTSS1L	16:70713217-70713226	11	11	-16.9178	0.0034047
TANGO2	22:20040959-20043465	10	11	-17.1509	0.033662
UAP1	1:162562521-162562572	11	11	-17.2006	0.0074025
PAPSS2	10:89481512-89481527	11	11	-17.3097	0.0064015
CYP4A11	1:47400124-47400233	11	11	-17.343	0.0064619
NUMA1	11:71723940-71727306	10	10	-17.5269	0.0104212
SLK	10:105770573-105770666	11	11	-17.6696	0.02408
TMEM68	8:56675980-56676260	10	11	-17.7369	0.0041193
CTNNB1	3:41281150-41281312	11	11	-18.0354	2.1521e-05
CTNNB1	3:41281150-41281309	11	11	-18.0532	2.1675e-05
RP11-429J17.8_SCRIB	8:144873835-144873910	11	11	-18.0965	0.00167677
SRPK2	7:104766694-104766787	11	11	-18.1745	0.021457
RNF115	1:145648015-145648067	11	11	-18.2081	1.3622e-06
ABLIM3_AC012613.2_RP11-331K21.1	5:148622053-148622101	11	11	-18.2603	0.000136717
TP53I13_RP11-68I3.2	17:27895526-27895566	11	10	-18.3646	0.00118257
ZDHHC16	10:99213555-99213603	11	11	-18.4661	0.000136735
PGPEP1	19:18468815-18468880	11	9	-18.5185	0.0074416
GOLGA2	9:131029472-131029553	11	9	-18.5577	0.00161787
FAM63A	1:150974799-150975444	9	11	-18.5794	0.0098771
ACIN1	14:23559190-23559310	11	9	-18.6038	0.0053577
CYP4A11	1:47400671-47400826	11	11	-18.763	0.0023198
SLAIN2	4:48396592-48396670	11	11	-18.7652	0.00036109
THNSL2	2:88484846-88484998	10	10	-18.9096	0.024462
UGP2	2:64069192-64069338	11	11	-18.9243	0.0033562
GIGYF2	2:233565294-233565364	10	9	-18.9939	0.00077529
OPA1	3:193343880-193343991	11	11	-19.0296	0.00181705
FAM63A	1:150975182-150975444	9	10	-19.1292	0.0168613
TCF20	22:42564614-42564742	10	11	-19.3936	0.003901
PCYT2	17:79865079-79865133	11	11	-19.442	5.9087e-05
NUMA1	11:71723446-71723488	11	11	-19.5559	0.0037809
SNHG11	20:37076572-37076736	11	11	-19.6773	0.000143952
CARKD	13:111276580-111276626	11	11	-19.748	0.0062235
INSR	19:7150507-7150543	11	10	-19.8457	0.020862
PRKDC	8:48694722-48694815	10	11	-19.8466	0.0023161
CYP4A11	1:47399847-47400038	11	11	-20.0401	0.0030373
STRA13	17:79977516-79977570	11	11	-20.1372	0.0055643
DMD	X:31144758-31144790	11	11	-20.3063	3.8573e-05
COBLL1	2:165583615-165583654	11	11	-20.6785	0.006039
GSTZ1_POMT2	14:77791212-77791264	11	11	-20.6968	1.67932e-05
SLC39A14	8:22267458-22267628	11	11	-20.8942	0.0100378
APLP2	11:129993506-129993674	11	11	-21.0382	2.2868e-05
NEU4	2:242756088-242756344	11	10	-21.4186	0.0036005
ECHDC2	1:53370762-53372283	11	11	-21.5076	0.00027602
ADORA2A	22:24867735-24867863	11	11	-21.5856	8.2798e-05
IQCJ-SCHIP1	3:159482888-159482927	11	10	-21.6375	0.0052962
LTBP3	11:65307483-65307624	11	11	-22.6084	0.00131538
ECHDC2	1:53372190-53372283	11	11	-22.6984	0.00024419
MTHFD2L	4:75009109-75009184	11	9	-22.8592	0.0082965
EXOC7	17:74086409-74086478	11	11	-22.8703	1.73552e-05
GOLGA2	9:131035063-131035144	10	10	-22.9902	0.00040485
LRRFIP2	3:37132957-37133029	11	11	-23.0179	8.467e-05
SLC17A9	20:61594074-61594086	11	10	-23.062	0.00057648
ARHGEF10L	1:17961042-17961057	11	11	-23.6157	0.0099442
RGN	X:46939715-46940335	11	11	-23.7044	0.00123905
NIPA2	15:23033893-23034146	9	10	-25.2022	0.0068177
SERGEF_RP1-59M18.2	11:18034397-18034497	9	9	-25.2391	0.0047025
AFMID	17:76201683-76201819	11	11	-25.7931	5.1125e-08
RIF1	2:152324987-152325065	10	11	-26.0345	0.002163
AFMID	17:76200908-76200981	11	11	-26.1311	3.3759e-07
RP11-665G4.1_CPEB2	4:15042087-15042111	11	10	-26.7776	0.0028045
AFMID	17:76201173-76201271	11	11	-27.3359	2.1575e-08
NDUFB9_MTSS1	8:125592791-125592803	11	11	-27.4027	1.266e-06
TCF7L2_RP11-57H14.2	10:114724314-114724383	10	11	-27.6199	0.000195028
KHK	2:27317667-27317802	11	11	-28.0313	0.00045514
AFMID	17:76201520-76201599	11	11	-28.5076	1.6681e-07
ACSM2B	16:20586743-20586829	11	10	-29.1904	0.00025667
AFMID	17:76200736-76200822	11	11	-29.2127	7.9165e-08
MLLT4	6:168314082-168314103	10	11	-30.1201	0.000137277
SORBS1	10:97174250-97174619	10	10	-30.499	0.0059423
RPS24	10:79799961-79799983	11	11	-31.6419	1.6223e-06
USO1	4:76716488-76716509	11	11	-47.3311	0.00012051
