# Supplementary material for: A human-specific switch of alternatively spliced AFMID isoforms contributes to TP53 mutations and tumor recurrence in hepatocellular carcinoma
Source: HighWire-hosted journal article supplement (doi:10.1101/gr.227181.117), 2018-02-15
Supplement: Supplemental_Table_S2.xlsx [file Supplemental_Table_S2.xlsx]

## Sheet: Table S2
Table S2. Splicing events detected in 119 non-HCC liver samples (GTEx) versus 16 liver cancer cell lines
Gene Symbol	Target Exon	N	T	Average ΔPSI	p-value
PEMT	17:17494844-17494910	136	16	70.2343	0
FN1	2:216245533-216245803	136	16	60.2033	2.381e-10
SLC39A14	8:22269549-22269719	135	16	58.066	1.62437e-12
TLE1	9:84226871-84226874	129	16	57.2279	1.62448e-12
GK-AS1_GK	X:30745582-30745669	136	14	57.1104	6.648e-07
HNRNPH1	5:179046269-179046408	136	16	51.8786	0
FN1	2:216236738-216237098	136	16	49.3675	1.62437e-12
DXO_SKIV2L_STK19	6:31938529-31938602	136	16	46.8667	1.62448e-12
PRPF3	1:150300778-150300925	136	16	46.5655	1.62448e-12
SNORD57_SNORD56_NOP56_SNORA51_SNORD86	20:2636680-2636860	136	16	46.2549	1.3632e-10
SEC31A	4:83763292-83763337	136	16	46.0662	2.929e-07
PPRC1	10:103904776-103904847	121	16	44.9992	1.62448e-12
MYO1B	2:192265474-192265561	136	16	44.8246	7.4249e-09
TIMM50	19:39973524-39973556	136	16	41.6993	0
KRTCAP2_RP11-201K10.3_TRIM46	1:155145104-155145368	136	16	41.5024	1.1482e-10
SIDT2	11:117059423-117059444	132	16	41.0379	1.11022e-16
TIAF1_MYO18A	17:27412621-27412666	136	16	39.6985	2.0153e-05
MYO1B	2:192267357-192267444	136	16	39.2167	1.4986e-10
KHK_EMILIN1	2:27317344-27317479	136	16	38.5979	6.0258e-11
TPM1	15:63336225-63336351	136	16	38.322	4.1494e-05
FAM76B	11:95512118-95512121	131	16	37.2468	1.62448e-12
IDI2-AS1_IDI1	10:1089333-1090111	136	16	37.0403	0
FLNA	X:153585618-153585642	135	16	36.9391	2.1e-08
RP11-517H2.6_FGFR1OP	6:167426995-167427055	124	16	36.6463	4.2095e-09
EHBP1	2:63215065-63215173	133	16	36.0131	1.3807e-08
KIAA1551	12:32133811-32138891	132	15	35.6031	1.62437e-12
TPM1	15:63336225-63336351	136	16	35.0006	8.3528e-05
AD000671.6_PSENEN_U2AF1L4_AC002398.9	19:36235593-36235639	134	16	34.8873	2.2557e-07
IP6K2	3:48731891-48731958	129	16	34.8724	4.2535e-11
TPM1	15:63336030-63336351	136	16	34.7709	0.000180509
DPM2_RP11-203J24.8	9:130698934-130699802	136	16	34.6196	0
FAM192A	16:57219732-57219736	136	16	34.6072	1.62437e-12
ZNF444	19:56657615-56657789	135	13	34.3922	0
MSTO2P_MSTO1_RP11-29H23.5	1:155583524-155583557	128	15	34.3652	1.3555e-06
CSDE1	1:115292594-115292828	135	16	34.0206	0
PGPEP1	19:18474200-18480515	121	16	33.7768	0
CCT7	2:73466770-73466924	136	16	33.7162	0
CSDE1	1:115292441-115292828	135	16	33.5901	1.62448e-12
KLC1_RP11-73M18.2	14:104145720-104145882	136	14	33.2007	2.66454e-15
FN1	2:216257653-216257926	136	16	33.1656	2.3813e-05
RGS12	4:3430284-3430438	136	16	33.1615	1.2719e-07
PC	11:66719900-66719939	128	16	32.8255	3.3459e-11
SLC39A14	8:22265822-22266009	135	16	32.5102	1.62448e-12
MARK4_TRAPPC6A	19:45681350-45681392	135	16	32.4873	1.62437e-12
REPS1	6:139247537-139251113	132	16	32.4432	5.9542e-07
RP11-163E9.2_PRKRIP1	7:102036423-102036984	136	16	31.8263	0
RP11-264B17.4_SPNS1_RP11-264B17.3	16:28992790-28992936	136	15	31.7581	1.62448e-12
FN1	2:216245533-216245803	136	16	31.7504	4.6576e-11
COX20	1:245005245-245005360	136	16	31.7448	0
SP140L	2:231265669-231265696	132	14	31.6837	0
CCDC152_SEPP1	5:42808252-42808468	136	13	31.5384	1.62437e-12
HSD17B7	1:162767591-162767617	132	16	31.3874	0
AC068533.7_CRCP	7:65592690-65592727	122	16	30.8167	0
RBM4_RBM14-RBM4	11:66407170-66407594	136	15	30.7987	0
REPS1	6:139247537-139247618	131	16	30.7245	5.1659e-07
SEC31A	4:83763292-83763634	136	16	30.5075	0
BIN1	2:127815048-127815177	136	15	30.502	4.0642e-05
CSDE1	1:115292441-115292828	135	16	30.48	0
LAMP2	X:119572930-119573148	136	16	30.3999	8.804e-11
KTN1	14:56130672-56130759	136	16	30.22	0
COX7A2	6:75950891-75950981	136	16	30.1704	0
RBM5_RBM6	3:50137964-50140515	121	16	29.641	1.62448e-12
MRI1	19:13876767-13876879	131	16	29.609	1.62448e-12
MFSD10	4:2934136-2934239	133	16	29.3084	0
KLHL10_NT5C3B	17:39992110-39992433	135	15	29.2388	1.62448e-12
ZBTB8OS	1:33100302-33100393	136	16	29.1808	0
KHK_EMILIN1	2:27315199-27315316	136	15	29.1567	1.62437e-12
ENOSF1	18:691106-691276	136	16	29.0203	1.2764e-09
CYP27B1_METTL1	12:58164876-58165040	122	16	28.9538	1.62437e-12
ASPH	8:62556503-62556560	134	16	28.8808	2.50577e-13
SPAG9	17:49053223-49053262	128	16	28.8097	9.9141e-05
CDV3	3:133306739-133307196	136	16	28.8033	0
SDHAF2_RP11-286N22.8_CPSF7	11:61205096-61205320	136	16	28.5493	1.62448e-12
FN1	2:216236831-216237098	136	16	28.5153	0
ZFAND1	8:82629483-82629523	133	16	28.4099	6.6038e-11
HNRNPH1	5:179046269-179046361	136	16	28.0839	0
FN1	2:216237023-216237098	136	16	28.0642	1.62448e-12
BCS1L	2:219526243-219526268	136	16	27.9645	0
TPM1	15:63353396-63353472	136	16	27.8047	8.39251e-12
TCF7L2	10:114918425-114918476	126	16	27.5346	0
ZXDC	3:126178495-126178580	135	14	27.4397	1.64335e-12
LSM14B	20:60702640-60702757	127	16	27.3585	8.519e-07
XXbac-B461K10.4_MICAL3	22:18295272-18295323	126	16	27.2368	0.00047993
RBM4_RBM14-RBM4	11:66407170-66407594	136	16	27.2255	1.11022e-16
YWHAE	17:1268152-1268352	136	16	26.976	1.62448e-12
NDUFV3	21:44317036-44317157	136	14	26.6343	6.9292e-08
ACP2_NR1H3	11:47281341-47281530	124	16	26.5743	6.1653e-09
SPCS2_XRRA1	11:74676078-74676162	136	16	26.4778	0
COX7A2	6:75950838-75950981	136	16	26.455	0
HNRNPH3	10:70097614-70097753	136	16	26.3738	0
NUMA1	11:71723940-71727306	135	16	26.3102	1.62459e-12
ARFGAP2	11:47196565-47196649	134	15	26.0726	1.67388e-12
OVCA2_DPH1	17:1945169-1945525	136	16	26.003	9.32476e-13
TTC8	14:89341369-89341453	134	16	25.8745	0
PARD3	10:34573062-34573173	135	16	25.8591	1.62437e-12
ATP13A1	19:19764883-19764953	136	16	25.8063	0
TEX22_MTA1	14:105911754-105911848	134	16	25.7721	0
GANAB	11:62407098-62407203	131	16	25.7166	0
PHC2_MIR3605	1:33799690-33799785	136	16	25.6922	1.64579e-12
SPCS2_XRRA1	11:74676078-74676162	136	16	25.6831	0
GANAB	11:62407102-62407203	131	16	25.5876	1.62448e-12
ARFGAP2	11:47196565-47196649	134	14	25.5249	2.39242e-12
JMJD8_WDR24	16:733909-734155	135	16	25.4608	1.0599e-06
KLHL10_NT5C3B	17:39992110-39992209	130	15	25.4494	0
USP36	17:76793961-76793984	131	16	25.3578	1.65756e-12
ARFGAP2	11:47196565-47196649	134	15	25.3362	1.85862e-12
AP2S1	19:47349249-47349399	136	16	25.2897	0
SLC22A5	5:131726381-131726596	125	16	25.2087	1.62448e-12
ILKAP	2:239098493-239098503	136	16	25.1833	0
PSMA2_PSMA2	7:42966981-42967058	136	16	25.1269	0
MLLT4	6:168366533-168366725	136	16	25.1188	1.64146e-12
UGP2	2:64083439-64083567	136	16	25.0391	0
RP5-901A4.1_NDUFS8	11:67799618-67799676	136	16	24.9867	0
ALDH3A2	17:19568260-19568360	133	14	24.9329	1.82831e-05
CYP27B1_METTL1	12:58164876-58165040	124	16	24.7826	0
TIMM50	19:39972522-39972673	136	16	24.7337	0
SNRPA1	15:101826418-101826498	135	16	24.6541	1.62437e-12
MARK3	14:103958113-103958371	136	16	24.6262	0
MTERFD2_SNED1	2:242038810-242039309	127	16	24.5034	1.62503e-12
SMARCB1	22:24134054-24134081	136	16	24.452	1.62836e-12
HSCB_CHEK2	22:29139869-29139911	135	16	24.437	0
BOD1	5:173040133-173040258	134	15	24.3244	0
UGP2	2:64083439-64083567	136	16	24.2943	0
GAS5	1:173837097-173837118	136	16	24.1809	0
AD000671.6_PSENEN_U2AF1L4_AC002398.9	19:36236088-36236113	133	16	24.0533	3.6892e-10
SDCCAG3	9:139304541-139304691	131	16	23.8764	1.62448e-12
EIF4H	7:73604576-73604636	136	16	23.8688	0
STX5	11:62598490-62598734	133	16	23.7885	1.62448e-12
STRA13	17:79977257-79977785	136	16	23.688	0
POP5	12:121017400-121017726	136	16	23.6396	1.44329e-15
CMC2	16:81030918-81031034	136	16	23.574	1.62881e-12
AC099850.1_SKA2	17:57208641-57208728	130	16	23.5734	0
SIRT6	19:4180778-4180906	132	16	23.5568	0
CLK3	15:74914460-74914834	136	16	23.5466	1.3857e-08
KLC1_RP11-73M18.2	14:104145720-104145855	136	16	23.4913	3.76166e-12
ASNSD1	2:190530766-190530879	136	16	23.4559	1.62448e-12
SNORD50_VPS29	12:110937339-110937351	135	16	23.4006	1.62448e-12
MYO1B	2:192267357-192267444	136	16	23.3744	0
TPM1	15:63353396-63353472	136	16	23.3452	4.93006e-12
PLEKHA1	10:124187791-124187832	132	16	23.326	0.00030036
THOP1	19:2811595-2811732	136	16	23.0707	0
GCNT3_GTF2A2	15:59942867-59942972	136	16	23.0585	1.62459e-12
CMC2	16:81030918-81031034	136	16	22.9424	1.57652e-14
SNORA60_SNHG11	20:37078904-37078978	135	16	22.9275	1.62448e-12
ITGA1_CTD-2288O8.1_PELO	5:52095718-52096954	131	16	22.8884	1.62725e-12
ZBTB8OS	1:33100368-33100393	136	16	22.6509	1.62437e-12
NSUN5	7:72718401-72718405	132	16	22.6116	0
RP11-155D18.12_ABHD14A_RP11-155D18.14_ABHD14B	3:52005714-52005908	136	16	22.5854	8.0098e-10
ADAM15	1:155033238-155033308	136	16	22.5658	1.62448e-12
SEC31A	4:83763337-83763634	136	16	22.5171	1.54321e-14
E2F5_C8orf59	8:86131464-86131592	136	16	22.5156	0.00035883
ELOVL1	1:43830679-43831047	136	16	22.4811	7.199e-09
IQCB1	3:121507130-121507279	133	16	22.4781	1.1375e-10
CCPG1_PIGB_DYX1C1-CCPG1	15:55653037-55653142	120	16	22.4145	0
RP11-73M18.6_KLC1	14:104158695-104158762	135	16	22.4135	2.85827e-12
CBWD2	2:114228609-114228666	121	16	22.3979	1.0144e-10
ENOSF1	18:690631-691276	136	16	22.3711	9.5618e-07
MARC2	1:220953359-220953421	136	14	22.2957	3.94129e-14
H2AFV	7:44882875-44882953	136	16	22.2293	0
PGS1	17:76410959-76411032	130	16	22.2127	1.1055e-10
FAM160A2	11:6239787-6239829	136	16	22.1953	2.9976e-15
APLP2	11:129992199-129992408	133	15	22.1532	0
CMC2	16:81030918-81031034	136	16	22.1453	0
LSM14B	20:60701359-60701495	128	16	22.1137	1.92291e-13
NASP	1:46072992-46074009	132	16	22.065	0.00061583
CMC2	16:81030918-81031034	136	16	22.0326	1.62448e-12
CDK11A_RP1-283E3.8	1:1650766-1650796	136	16	21.9681	1.80522e-12
BIN1	2:127815048-127815177	136	15	21.9653	4.0077e-05
WIPI2	7:5269336-5269369	136	16	21.9283	2.58682e-14
ACP1	2:272036-272150	136	16	21.8669	0
HNRNPC	14:21699116-21699155	136	16	21.7328	1.5705e-09
AD000671.6_PSENEN_U2AF1L4	19:36236025-36236113	136	16	21.5859	0
BIN1	2:127815048-127815177	136	15	21.5472	4.2605e-05
AFMID	17:76198579-76198684	136	16	21.5215	9.40359e-14
SNHG1	11:62622604-62622688	134	16	21.4943	0
WBSCR22	7:73101328-73101425	136	16	21.3334	1.62448e-12
DCUN1D5	11:102953476-102953568	123	16	21.3299	1.62437e-12
EXOSC1_ZDHHC16	10:99211427-99211675	132	16	21.242	0
APLP2	11:129990600-129990713	135	16	21.1925	0
MRPL48	11:73536752-73536841	135	16	21.1726	1.62437e-12
MLST8	16:2258210-2258450	136	16	21.0798	0
KLC1_RP11-73M18.2	14:104145720-104145882	136	16	20.9328	1.62437e-12
RBM6	3:50036872-50036946	136	16	20.8989	1.72184e-12
PCYT2	17:79866872-79866913	136	16	20.8184	1.62448e-12
VEGFB	11:64004891-64004992	136	16	20.8046	4.66294e-15
COMMD4	15:75631325-75631445	136	16	20.7932	0
SLTM_RNF111	15:59191667-59192136	132	16	20.7794	0
FAM192A	16:57219732-57219942	136	16	20.7401	7.59282e-13
AC099850.1_SKA2	17:57208641-57208728	130	16	20.6987	0
PPHLN1	12:42768664-42768876	126	16	20.6661	1.11022e-16
AD000671.6_PSENEN_U2AF1L4_AC002398.9	19:36235639-36236113	134	16	20.6148	3.1045e-08
IMMP1L	11:31484718-31484852	124	16	20.5977	7.3666e-11
TPM1	15:63353396-63353911	136	16	20.5664	5.29854e-12
PCNT	21:47863722-47863861	135	16	20.5281	9.8095e-09
POP4	19:30101315-30101364	135	16	20.5272	1.62659e-12
AIP	11:67254476-67254656	136	16	20.514	0
SCARNA12_PHB2_EMG1	12:7078660-7078740	136	14	20.4417	0
EIF4A1_SNORA67_SENP3_SENP3-EIF4A1	17:7477577-7477626	136	16	20.4309	5.8528e-10
MBNL2	13:98018712-98018807	128	15	20.3912	2.6883e-06
XXbac-B461K10.4_MICAL3	22:18286576-18286627	124	16	20.3123	0.00054042
CCDC58	3:122090521-122090647	131	15	20.3054	1.85618e-12
TRMU	22:46746187-46746242	135	16	20.2254	5.4998e-11
STRA13	17:79977183-79977257	136	16	20.2161	0
POFUT2	21:46702313-46702374	127	16	20.159	1.70708e-12
REXO2_RP11-212D19.4	11:114311377-114311461	135	16	20.1395	1.62448e-12
ANKZF1_ATG9A	2:220095072-220095127	134	16	20.1311	0
YWHAE	17:1265223-1265302	136	16	20.0458	0
ANAPC5	12:121766261-121766300	136	16	20.0099	1.9984e-15
AC115618.1_RBM3	X:48433948-48434055	136	16	19.9976	1.62448e-12
KLC1_APOPT1_RP11-73M18.2_BAG5	14:104037959-104038157	135	16	19.9394	1.62437e-12
SEPP1_CTD-2325A15.5	5:42808252-42808468	136	13	19.9342	1.62448e-12
ING4	12:6765892-6765964	135	16	19.8772	1.62459e-12
PHC2_MIR3605	1:33799690-33799893	136	16	19.8752	1.62592e-12
ACOX1	17:73956295-73956456	120	16	19.8739	5.25761e-11
IMPA1	8:82588468-82588514	130	16	19.8658	1.62448e-12
RP11-438J1.1_TATDN2	3:10320568-10320718	132	16	19.8595	0
TPST2	22:26940569-26940641	135	16	19.8102	1.62437e-12
ZNF271_ZSCAN30_RP11-158H5.7	18:32870973-32871196	136	16	19.7618	1.2074e-09
MIR4685_HPS1	10:100193696-100193739	135	16	19.7571	1.50927e-05
MARK3	14:103964838-103964865	136	16	19.7002	0.00091871
SEPP1	5:42804875-42807210	136	13	19.6505	2.3229e-09
C11orf24	11:68039113-68039324	136	16	19.6475	4.1231e-07
MORF4L2	X:102939608-102939657	136	16	19.5893	0
PLEKHA1	10:124187791-124187936	132	16	19.5804	4.1778e-05
ABHD17A	19:1881233-1881803	136	16	19.458	2.157e-06
STRA13	17:79977733-79977785	136	16	19.4554	1.62448e-12
MTA1	14:105930752-105930799	136	16	19.4403	1.29008e-13
BAX	19:49458804-49458856	136	16	19.3057	1.5227e-09
MARK3	14:103964838-103964865	136	16	19.3045	0.00061722
CHTF8_CHTF8	16:69155338-69155396	129	16	19.2769	1.62448e-12
PTCD1_ATP5J2_ATP5J2-PTCD1	7:99063733-99063751	136	16	19.2628	0
FIBP	11:65652979-65653134	136	16	19.2401	1.11022e-16
NPC2_MIR4709	14:74951117-74951290	136	16	19.2261	1.62448e-12
SEC31A	4:83782783-83782861	128	16	19.1578	5.28111e-12
LINC00969	3:195416209-195416309	120	14	19.1128	2.9344e-07
ARIH2	3:48964894-48965246	123	16	19.1114	0
MLLT4	6:168366436-168366533	136	16	19.0939	0
STAG3L2_GTF2I_AC083884.8	7:74133197-74133260	130	16	19.0839	8.0135e-11
MYO9B	19:17321141-17321189	136	16	19.021	0
AC099850.1_SKA2	17:57208641-57208728	129	16	19.0109	1.62448e-12
SDHD_TIMM8B_SDHD	11:111958580-111958697	136	16	18.9695	1.62448e-12
ITFG3	16:299547-299653	125	16	18.925	1.62448e-12
NOSIP	19:50060337-50060506	136	16	18.8383	0
MXRA7	17:74679928-74680009	121	16	18.7931	6.461e-05
H2AFV	7:44880497-44880611	136	16	18.73	1.62448e-12
KLC1_RP11-73M18.2	14:104145855-104145882	136	16	18.6957	1.3205e-08
SEC16A	9:139339503-139339563	136	16	18.6561	1.4487e-11
ECHDC1	6:127651953-127652175	129	16	18.648	0
GPRC5C	17:72436185-72436966	136	15	18.6335	2.4661e-10
DNAJC19	3:180704730-180704810	136	16	18.5886	0
OCIAD1	4:48834636-48834778	136	16	18.5866	0
SH2B1	16:28884026-28884079	136	16	18.5686	7.4981e-07
CPSF3L	1:1256375-1256473	135	16	18.5316	1.66533e-15
DDX39A	19:14521800-14521984	136	16	18.4749	0
ACSS2	20:33500898-33500990	135	16	18.4576	1.442e-07
GOLGA4	3:37402733-37402796	136	16	18.4426	0.0033391
CPSF3L	1:1255835-1255909	134	16	18.4121	1.62859e-12
RPS3A	4:152021636-152021740	136	16	18.4066	0
RPL18A	19:17972101-17972116	136	16	18.3816	4.341e-07
MTCH1	6:36940427-36940478	136	16	18.3544	2.2446e-05
CLASRP	19:45561140-45561156	136	16	18.3108	0
MAEA	4:1305766-1305949	136	16	18.3086	0
NDUFA5	7:123190523-123190640	136	16	18.2895	0
REPS1	6:139247537-139247615	131	16	18.2592	2.2505e-06
IL17RC	3:9965665-9965704	136	16	18.2326	1.62448e-12
WIPI2	7:5232748-5232802	120	16	18.2276	7.2221e-10
PANK4	1:2442187-2442221	136	16	18.1972	9.4886e-10
AL022341.1_FAM195A	16:692119-692249	136	16	18.1518	1.05582e-13
AKIP1_ST5	11:8933999-8934080	123	16	18.1478	9.88289e-11
YBX3	12:10862506-10862713	136	16	18.1076	3.522e-11
TMEM55B	14:20929321-20929342	124	16	18.0803	2.7415e-07
DTWD1	15:49924355-49924499	129	16	18.0757	9.6374e-10
RPS16	19:39926297-39926348	136	16	18.063	0
CPSF7	11:61187393-61187420	136	16	18.0075	1.01452e-12
TIMM50	19:39976327-39976447	135	16	17.9792	1.1589e-09
FUS	16:31198122-31198157	136	16	17.9542	0
HSCB_CHEK2	22:29140602-29140697	135	16	17.9459	4.0086e-05
UFD1L	22:19462992-19463125	135	16	17.9394	1.62481e-12
MORF4L2	X:102939608-102939657	131	16	17.9214	2.4197e-09
PSMD9_RP11-87C12.2	12:122332644-122332747	136	16	17.92	0
PARD3	10:34626202-34626292	133	16	17.9168	8.4545e-09
KIAA0195	17:73487933-73487981	120	16	17.9058	2.6508e-07
ERCC1_CD3EAP	19:45918118-45918218	136	15	17.8986	1.62437e-12
NAA60_NAA60_LA16c-306E5.3	16:3535061-3535083	136	16	17.8475	0
HSCB_CHEK2	22:29140602-29140697	135	16	17.8356	1.66001e-12
DLG4_ACADVL	17:7123782-7123922	136	16	17.7588	1.1791e-11
TRMU	22:46746187-46746246	136	16	17.7109	9.6632e-09
SLTM_RNF111	15:59205697-59205895	129	16	17.7071	0
EIF2B5_AP2M1	3:183896644-183896979	136	16	17.6534	1.62437e-12
KLC1_RP11-73M18.2	14:104145720-104145855	136	16	17.6177	6.88338e-15
AP1B1	22:29725700-29725709	136	16	17.6131	5.7849e-05
AD000090.2_TMEM147	19:36037573-36038020	136	16	17.609	3.5907e-07
MTFR1L_AL020996.1_RP1-317E23.3_RP1-317E23.6	1:26149509-26149619	135	16	17.6089	1.62437e-12
SNORD6_KIAA1731_SNORA32_TAF1D_SNORA25	11:93466515-93466585	136	16	17.603	1.4779e-09
ITGB1BP1	2:9558754-9558861	129	16	17.5648	1.62448e-12
ITFG3	16:299547-299657	125	16	17.5647	1.62437e-12
CRAMP1L_HN1L_LA16c-431H6.6	16:1735439-1735588	134	16	17.5544	1.62437e-12
SHMT2	12:57624585-57624749	136	16	17.5498	1.62448e-12
MAGED2	X:54836154-54836250	135	16	17.518	1.62459e-12
MTFR1L_AL020996.1_RP1-317E23.3_RP1-317E23.6	1:26149509-26149619	135	16	17.4832	1.62437e-12
AC068533.7_CRCP	7:65592690-65592727	122	16	17.4811	1.62437e-12
PDXDC1	16:15092196-15092262	134	16	17.4674	1.62448e-12
TSPAN4_POLR2L	11:847200-847300	130	16	17.4494	0
WDPCP_MDH1	2:63821621-63821720	136	16	17.4463	0
KLHDC3_MEA1	6:42981523-42981635	120	16	17.4277	7.0162e-11
EIF3M	11:32608557-32608690	136	16	17.4126	1.62437e-12
RPL6	12:112847214-112847390	136	16	17.4022	2.57711e-11
DDX39A	19:14521800-14521948	136	16	17.3561	1.62437e-12
CAPN10	2:241535735-241535938	133	16	17.3293	1.1046e-07
MAGED2	X:54836154-54836241	135	16	17.2637	1.62448e-12
ZC3H14	14:89069171-89069404	135	15	17.2595	7.3213e-10
KB-1208A12.3_RPL30_SNORA72	8:99057054-99057316	136	16	17.1305	0
COMMD4	15:75630402-75630474	136	16	17.1238	0
NUP85	17:73222145-73222252	136	16	17.1039	0
DAZAP1	19:1425876-1425959	136	16	17.0614	0
FLNB	3:58127623-58127656	126	16	17.0327	0
RP11-729L2.2_SMAD4	18:48584494-48584614	128	15	17.0274	5.08149e-13
NUMB	14:73745988-73746132	136	16	16.971	0.0034358
PI4KB	1:151288048-151288985	124	16	16.9309	8.9378e-08
AP000304.12_ITSN1	21:35195790-35195957	133	16	16.9296	6.5612e-09
RP11-773D16.1	10:81568588-81568719	133	16	16.9077	0.0102377
ATG4D	19:10657514-10657864	135	16	16.8875	4.417e-08
BAX	19:49458804-49458856	136	16	16.8525	6.10623e-15
TAF1D_SNORA8_SNORA18_MIR1304_SNORD5	11:93466563-93466585	136	16	16.8509	4.44089e-16
BRD1	22:50181142-50181535	127	16	16.8265	2.8126e-06
DHODH	16:72055022-72055210	136	16	16.8218	1.62437e-12
DDX23	12:49231176-49231440	134	16	16.7892	8.7473e-11
C16orf87	16:46843514-46843697	124	16	16.7682	9.1066e-10
MLLT4	6:168366436-168366725	136	16	16.7637	0
RP4-614O4.11_EIF6	20:33871978-33872064	136	16	16.7289	0
PDXDC2P_RP11-419C5.2	16:70010713-70011906	136	15	16.7253	0.0125629
RP1-309K20.6_CPNE1	20:34252681-34252723	134	16	16.6907	4.1512e-09
CEBPZ_CEBPZ-AS1	2:37429005-37431446	134	16	16.6545	4.747e-07
SREBF1	17:17720765-17720771	136	16	16.6162	1.62437e-12
RP11-315D16.2_CLN6	15:68503986-68504201	133	16	16.5529	1.62448e-12
EXOSC8_SUPT20H	13:37584688-37584792	136	16	16.5515	2.72899e-11
DHRS4L2	14:24464240-24464342	128	13	16.5392	4.0622e-09
TRMT1	19:13223709-13223722	136	16	16.5324	1.62448e-12
NAP1L1	12:76467982-76468019	135	14	16.5245	1.0117e-09
TPM2	9:35684728-35684804	136	16	16.4943	0.000195961
MPHOSPH9	12:123646661-123647560	122	16	16.472	1.8346e-06
KLC1_APOPT1_RP11-73M18.2_BAG5	14:104037959-104038157	128	13	16.4686	2.2783e-05
MIB2_RP11-345P4.9	1:1558768-1558862	135	15	16.4613	4.74065e-12
MAPKAPK5-AS1_AC003029.1	12:112277807-112278281	124	16	16.4507	7.8795e-10
HNRNPM	19:8527412-8527465	136	16	16.4475	1.62437e-12
COMMD4	15:75631604-75631685	136	16	16.4445	0
GNAS	20:57473995-57474040	136	16	16.4233	1.44329e-15
COX4I1_EMC8	16:85834810-85834884	136	16	16.3847	3.4544e-10
ETHE1	19:44030666-44030811	136	16	16.3676	1.62448e-12
WASH3P	15:102512785-102512798	123	16	16.33	7.50344e-12
RP11-680A11.5_C12orf10_PFDN5	12:53696817-53696977	136	16	16.3098	0
DCUN1D3_LYRM1_ERI2	16:20913807-20914039	124	16	16.3028	2.1343e-06
RP1-309K20.6_CPNE1	20:34252681-34252800	134	16	16.2876	5.3064e-09
NFKBIL1	6:31525581-31525626	135	16	16.2623	7.77156e-16
IL17RC	3:9965564-9965704	136	16	16.2341	1.62437e-12
MYL6_MYL6B_RP11-603J24.14	12:56552467-56552495	136	16	16.1533	0
H2AFY_C5orf66	5:134688635-134696186	136	16	16.1477	0.00178451
NDUFV3	21:44323291-44324386	136	16	16.0866	0.0134372
RBFOX2	22:36152151-36152191	135	16	16.0693	2.9952e-08
PNPLA4	X:7895711-7895726	127	14	16.0504	3.4447e-06
RPS3_SNORD15A	11:75111737-75111821	136	16	16.0474	2.6202e-10
KIFC3	16:57793639-57793748	136	15	16.0289	4.0153e-05
ACTN1	14:69345705-69345786	136	16	16.026	1.5409e-09
HNRNPC	14:21731469-21731495	136	16	15.9459	7.18314e-14
KHK_EMILIN1	2:27315199-27315316	136	16	15.9171	6.785e-08
GDI2	10:5808258-5808601	136	16	15.9088	2.2877e-10
HM13_HM13-AS1	20:30156027-30156083	135	16	15.9053	1.6106e-06
AD000671.6_PSENEN_U2AF1L4_AC002398.9	19:36236025-36236113	124	16	15.892	2.3404e-09
FNBP4	11:47747288-47747388	136	16	15.8707	2.127e-08
DHRS4_DHRS4-AS1	14:24429110-24429212	136	16	15.8638	3.11118e-12
NTAN1_PDXDC1	16:15141853-15141956	126	16	15.7969	2.64788e-13
KTN1	14:56133958-56134048	136	16	15.7945	1.65512e-12
SF1	11:64540901-64540977	136	16	15.7415	0
ZC3H14	14:89068267-89068427	136	16	15.7397	5.7436e-10
ILF3	19:10795091-10795152	136	16	15.7167	1.3066e-11
GPBP1	5:56532939-56532999	136	16	15.7127	7.32747e-14
TAX1BP1	7:27855967-27856013	135	14	15.7007	3.19744e-14
CHD1L	1:146742592-146742666	135	16	15.6832	1.62514e-12
MBD1	18:47801346-47801415	136	16	15.6742	0
ZHX1_ZHX1-C8ORF76	8:124265561-124268411	127	16	15.6441	2.5392e-10
DCAF8_DCAF8	1:160231906-160232065	128	16	15.642	5.33462e-13
SLC25A37	8:23423620-23424326	129	16	15.6379	3.6647e-05
SLTM_RNF111	15:59191667-59192082	132	16	15.5942	2.26308e-12
CPSF3L	1:1255835-1256473	135	16	15.5662	1.26676e-13
MGST1	12:16507164-16507204	136	14	15.5608	5.8264e-08
RRNAD1	1:156703800-156703844	136	16	15.5552	5.6626e-10
SSNA1_ANAPC2	9:140083517-140083603	136	16	15.5524	0
DIABLO_RP11-512M8.5	12:122709058-122709191	135	16	15.5339	4.44089e-16
CTNNB1	3:41281309-41281312	136	16	15.5227	1.69775e-12
GSTM4	1:110200211-110200293	134	15	15.4949	1.62448e-12
BCAP29	7:107258772-107262074	136	16	15.4626	1.899e-10
B4GALT4	3:118937496-118937558	133	16	15.4581	1.62437e-12
TIMM50	19:39976327-39976447	135	16	15.4418	4.3087e-09
SUPT20H	13:37599456-37599574	120	16	15.4395	1.62448e-12
RCOR3	1:211486061-211486177	127	16	15.4214	2.1659e-11
C14orf37_PSMA3	14:58714467-58714550	136	16	15.4116	0
MIR3656_RPS25_TRAPPC4	11:118889852-118889898	136	16	15.4065	0
SLC35A2	X:48762169-48762759	135	16	15.3977	2.8148e-06
MORF4L2	X:102939608-102939657	133	16	15.3792	6.694e-07
ECI2_C6orf201	6:4117685-4119509	136	16	15.3621	1.62448e-12
PTBP1	19:804035-804208	136	16	15.3433	2.95941e-12
QPRT	16:29705984-29706076	136	15	15.325	1.62448e-12
H2AFY_C5orf66	5:134705725-134705832	136	16	15.2894	1.62448e-12
SNHG5	6:86387671-86387750	136	16	15.2673	1.769e-10
EXOC7	17:74087223-74087316	127	16	15.2365	6.006e-05
RP11-438J1.1_TATDN2	3:10320568-10320747	132	16	15.2144	2.64855e-12
CPSF7	11:61188861-61189080	136	16	15.1883	1.62448e-12
SDHC	1:161293403-161293460	136	16	15.134	0
MIR3656_RPS25_TRAPPC4	11:118889852-118889920	136	16	15.117	1.62448e-12
PLSCR1	3:146246400-146246618	134	16	15.1136	5.83922e-12
DGCR6L	22:20307161-20307322	136	16	15.1093	1.5097e-07
TMEM161A	19:19245592-19245696	133	16	15.0945	1.62625e-12
C16orf87	16:46843514-46843697	124	16	15.0778	9.7509e-08
PCBP1-AS1	2:70310638-70310669	134	15	15.0764	4.0704e-05
PSMA4	15:78834518-78834561	136	16	15.0662	6.66134e-15
PLA2G12A	4:110639844-110639915	136	16	15.0364	0
COMMD4	15:75630402-75630479	136	16	15.0012	0
EXOSC8	13:37580056-37580093	136	16	14.9638	1.62437e-12
ELOVL1	1:43830856-43831047	136	16	14.9607	1.11022e-16
MIR3656_RPS25_TRAPPC4	11:118889852-118890134	136	16	14.9592	1.62448e-12
RPS2_NDUFB10_SNORA64_SNORA10	16:2012657-2012910	136	16	14.9581	1.62448e-12
MSTO2P_MSTO1_DAP3	1:155701734-155701824	136	16	14.9363	1.62448e-12
FERMT3_TRPT1	11:63992266-63992442	136	16	14.935	1.51449e-05
CACYBP	1:174973749-174973950	135	16	14.9291	1.94766e-12
KLC1_RP11-73M18.2	14:104153417-104153548	131	13	14.9252	0.00150328
TARS2	1:150468957-150469104	128	16	14.9058	3.7442e-05
TAZ	X:153642437-153642527	136	16	14.8993	0.00058032
NKIRAS2_DNAJC7	17:40174416-40174490	134	16	14.8482	1.62437e-12
DGUOK	2:74173845-74174033	136	16	14.8328	1.1401e-11
UPF3A	13:115064314-115064475	136	16	14.8172	2.9396e-08
CMC1	3:28304781-28304871	136	16	14.8121	1.27787e-13
PTCD1_ATP5J2_CPSF4_ATP5J2-PTCD1	7:99051588-99051663	132	16	14.7957	3.7717e-08
UBE2J2	1:1203241-1203372	135	16	14.7915	1.11022e-16
C14orf37_PSMA3	14:58714467-58714550	136	16	14.7891	0
SSBP4_ISYNA1	19:18544627-18544742	134	16	14.7523	1.7879e-08
REXO2_RP11-212D19.4	11:114314577-114314655	136	16	14.7313	0
APIP	11:34916556-34916657	125	16	14.7213	1.71319e-12
REXO2_RP11-212D19.4	11:114314577-114314655	136	16	14.6933	0
BCL7B	7:72957877-72957974	136	16	14.6808	1.82232e-12
RP11-574K11.31_ZSWIM8_ZSWIM8-AS1	10:75559928-75559952	136	16	14.6802	0
SNORA63_SNORA4_EIF4A2	3:186506098-186506209	136	16	14.6658	3.977e-06
ANAPC15_LRTOMT	11:71822457-71822487	136	16	14.652	0
SHMT2	12:57624585-57624783	136	16	14.6344	1.62448e-12
MSTO2P_MSTO1_DAP3	1:155701734-155701824	136	16	14.5704	0
CARKD	13:111274562-111274713	135	16	14.5175	8.90044e-12
PLAG1_CHCHD7	8:57125320-57125448	133	16	14.5088	8.9575e-12
PHF1	6:33382731-33382742	136	16	14.5062	2.7908e-09
CAPN10	2:241535735-241535938	133	16	14.5043	2.0764e-10
NKIRAS2_DNAJC7	17:40174416-40174490	134	16	14.4934	0
UBE2J2	1:1203112-1203372	135	16	14.4927	8.88178e-16
MRPL30_MRPL30_MITD1_C2orf15	2:99802639-99802717	124	16	14.4868	1.62437e-12
PRDX5_TRMT112	11:64087205-64087340	136	16	14.4828	0
ARHGAP17_AC008731.1	16:24939004-24939053	136	16	14.4732	0.0021647
FAM207A	21:46363707-46363752	134	16	14.4579	1.62992e-12
CAMLG	5:134076752-134077213	136	16	14.4482	4.9237e-10
MYL6_MYL6B_RP11-603J24.14	12:56552467-56552495	136	16	14.446	0
MYL6_MYL6B_RP11-603J24.14	12:56552467-56552495	136	16	14.4455	0
CPSF7	11:61188002-61188045	136	16	14.4422	1.2025e-10
MGRN1	16:4727463-4727573	135	16	14.3786	1.62526e-12
MAEA	4:1321414-1321491	136	16	14.3641	0
Y_RNA_ACAA1	3:38168000-38168191	136	16	14.3444	0
EIF3B	7:2419838-2419918	136	16	14.3434	1.11022e-16
CTB-175E5.7_UBTF	17:42289711-42289822	135	16	14.3319	8.3538e-11
TMCO6_NDUFA2	5:140021454-140021899	129	16	14.33	2.6928e-07
RBCK1	20:401650-401675	136	16	14.3248	0
MARK3	14:103958113-103958371	136	16	14.3234	3.33067e-16
USP21	1:161133712-161133771	122	16	14.2707	1.62936e-12
IRF3	19:50165204-50165585	136	16	14.2704	7.79377e-14
SNORD84_ATP6V1G2-DDX39B_DDX39B	6:31508178-31508441	136	16	14.252	1.87676e-05
SLC25A37	8:23423620-23423849	129	16	14.2271	0.00021894
ARHGAP17	16:24950684-24950918	123	16	14.2265	8.6465e-09
NACA	12:57118235-57118307	136	16	14.2151	3.6456e-10
RP11-155D18.12_ABHD14A_RP11-155D18.14_ABHD14B	3:52005827-52005908	136	16	14.1733	1.1923e-08
ACSS2	20:33502125-33502240	136	16	14.1693	1.1643e-08
GUK1	1:228333211-228333350	136	16	14.1409	0
LGALS1	22:38072992-38073072	136	16	14.1358	0
NDEL1	17:8347577-8347675	130	16	14.1342	3.7144e-11
SSR2	1:155987922-155988159	136	16	14.1204	0
TGIF2-C20orf24_C20orf24	20:35238003-35238161	136	16	14.1148	1.62448e-12
COX20	1:245005245-245005360	136	16	14.1076	5.28355e-13
UBE2J2	1:1203112-1203372	135	16	14.1041	1.6247e-12
MMP11_CHCHD10	22:24109727-24109780	121	14	14.1037	8.4133e-09
PTPN2	18:12825808-12825943	128	16	14.0763	5.88418e-15
ATP6V0D1	16:67487446-67487618	136	14	14.0526	3.1326e-08
ACAD10	12:112186814-112186976	136	16	13.9522	0.00131657
SSR4_IDH3G	X:153061888-153062007	136	16	13.9522	1.62448e-12
PDIA5	3:122849326-122849463	136	16	13.9504	3.9031e-06
OVOL3_POLR2I_TBCB	19:36605314-36605615	136	16	13.9441	3.1303e-08
ING4	12:6765892-6765964	134	16	13.9369	5.1686e-11
CARS	11:3023191-3023283	136	16	13.9312	1.62437e-12
TCIRG1	11:67810412-67810498	136	15	13.9178	3.9826e-08
EIF3B	7:2419838-2419913	136	16	13.9142	0
ARL6IP4_ABCB9_RP11-197N18.2	12:123466141-123466202	136	16	13.9109	2.4186e-09
MIR3656_RPS25_TRAPPC4	11:118889852-118890027	136	16	13.9022	1.62614e-12
DDX55	12:124103978-124103994	135	16	13.901	1.62437e-12
ST7	7:116859137-116859230	136	16	13.8933	1.4939e-10
LLGL2	17:73570293-73570341	136	16	13.871	8.9062e-07
CAPN10	2:241535735-241535938	133	16	13.8657	1.8413e-10
MSTO2P_MSTO1_YY1AP1	1:155638508-155638568	136	16	13.8224	9.6965e-11
HSCB_CHEK2	22:29140602-29140692	134	16	13.809	3.5773e-05
REPIN1_ZNF775_RP4-584D14.5	7:150066759-150066957	124	16	13.7806	2.2894e-08
RP1-309K20.6_CPNE1	20:34252723-34252800	134	16	13.7463	0.000101268
PSMA4	15:78834518-78834561	136	16	13.7405	7.61502e-13
NAGK	2:71302684-71302772	132	16	13.7382	6.3306e-08
SHKBP1	19:41094987-41095084	136	16	13.7257	1.62448e-12
TOM1L1	17:52981068-52981153	121	14	13.6904	2.4578e-08
MRPL30_MRPL30_MITD1_C2orf15	2:99802639-99802717	126	16	13.6854	9.99201e-16
TPRKB	2:73961654-73961718	135	16	13.6649	1.62448e-12
CIZ1	9:130952607-130952723	127	16	13.6491	2.935e-08
ZC3H14	14:89069171-89069389	136	16	13.6238	5.0556e-11
TCP1	6:160206931-160207029	136	16	13.6236	1.62437e-12
STK25	2:242447857-242447919	136	16	13.6209	7.1512e-10
KDM5A	12:395291-395373	123	16	13.619	4.4081e-06
NUP88	17:5307418-5307566	136	16	13.6168	0
EIF4G2_RP11-685M7.5_SNORD97	11:10823207-10823595	136	16	13.6156	8.0385e-11
SNORD84_ATP6V1G2-DDX39B_DDX39B	6:31508311-31508441	136	16	13.6036	4.4047e-05
ACP1	2:272036-272191	136	16	13.5982	9.1008e-10
SDHAF2_RP11-286N22.8_CPSF7	11:61205096-61205320	136	16	13.5966	2.47735e-12
RPS15	19:1438805-1438891	136	16	13.5963	0
FKBP8	19:18650180-18650269	136	16	13.5944	0
DERL2	17:5383706-5383863	136	16	13.5909	0
UBE2J2	1:1203241-1203372	135	16	13.5864	1.62514e-12
STRADA_RP11-51F16.8	17:61781791-61781942	136	16	13.5827	1.1295e-10
RPS15	19:1438805-1438891	136	16	13.5811	0
CPSF7	11:61188018-61188045	136	16	13.5741	1.75304e-13
PTCD1_ATP5J2_CPSF4_ATP5J2-PTCD1	7:99051588-99051666	135	16	13.5667	1.7487e-08
NKIRAS2_DNAJC7	17:40174416-40174658	134	16	13.5593	1.62448e-12
CARM1	19:11032050-11032119	136	16	13.5266	0.0002578
WFIKKN1_C16orf13	16:685280-685340	136	16	13.4864	5.8933e-07
EXOSC1_ZDHHC16	10:99211427-99211675	130	16	13.4623	2.4537e-09
HDLBP_SEPT2	2:242263630-242263656	133	16	13.462	1.89349e-12
SMCHD1_RP11-703M24.5	18:2778166-2778237	131	16	13.4613	0
CCDC90B	11:82996595-82996915	125	16	13.4599	7.0358e-08
BPHL	6:3119518-3119746	130	16	13.4397	8.54872e-14
NTMT1	9:132395080-132395144	136	16	13.423	0
EIF3B	7:2419838-2420049	136	16	13.4031	0
SSR2	1:155987922-155988159	136	16	13.3957	0
AFMID	17:76200908-76200981	136	16	13.392	0
SSR2	1:155988042-155988159	136	16	13.3886	0
IMMP1L	11:31484718-31484852	124	16	13.3876	4.15112e-13
SNORA63_SNORA4_EIF4A2	3:186506098-186506205	136	16	13.3809	2.1627e-06
RFXANK	19:19307774-19307855	136	16	13.3474	1.86295e-13
ATP6V0E1	5:172421777-172421825	136	16	13.3316	0
RWDD1	6:116895220-116895334	136	16	13.3064	4.1916e-05
RP5-890O3.9_CPSF3L	1:1256375-1256476	135	16	13.3042	1.4062e-10
TMEM106C	12:48359064-48359128	136	16	13.2951	1.62492e-12
SLC37A4	11:118898438-118898582	136	16	13.2917	4.3717e-05
SSR2	1:155988060-155988159	136	16	13.2822	0
SNORA34_KANSL2	12:49054250-49054402	134	16	13.2562	2.98872e-13
CYP2R1	11:14900753-14900989	121	13	13.2515	0.00141859
SHKBP1	19:41088331-41088372	132	16	13.2109	5.5791e-08
RHOT2_WDR90	16:718352-718411	136	16	13.1919	0
ATP6V0D1	16:67487446-67487618	136	16	13.1917	4.89053e-13
TMEM106C	12:48359064-48359128	136	16	13.1814	3.33067e-16
TMEM106C	12:48359064-48359128	136	16	13.1692	1.62459e-12
NUBP2_SPSB3	16:1836537-1836656	136	16	13.158	2.66454e-14
MAPK14	6:36067964-36068044	136	16	13.1291	1.44329e-15
HNRNPC	14:21731469-21731495	136	16	13.1202	0
MTERFD2_SNED1	2:242035807-242035853	120	16	13.1145	0.00167908
LCMT1_RP11-266L9.2	16:25162874-25162936	120	16	13.1084	1.62736e-12
ATP6V0D1	16:67487446-67487618	136	16	13.1045	6.11733e-13
RP5-890O3.9_CPSF3L	1:1256375-1256473	135	16	13.1044	1.8092e-10
HNRNPC	14:21731469-21731495	136	16	13.1022	0
NUBP2_SPSB3	16:1836537-1836656	136	16	13.0914	0
TOM1L1	17:52981068-52981153	126	16	13.0893	4.5259e-10
C17orf49_RNASEK-C17orf49_MIR497HG_RP11-589P10.7	17:6919844-6920004	136	16	13.039	1.2813e-10
SMPD1	11:6412613-6413426	136	16	13.0343	0
SLC25A20	3:48896987-48897060	135	13	13.007	4.0419e-06
NSMCE1	16:27238040-27238157	136	16	13.0069	5.55112e-16
IMPA1	8:82588468-82588500	130	16	12.9938	1.62448e-12
ATP6V0D1	16:67487446-67487618	136	16	12.9741	9.58678e-13
TANK_AC009313.1	2:162017795-162017923	125	16	12.9699	1.8622e-05
SNORD50_VPS29	12:110937261-110937351	135	16	12.9635	1.62448e-12
RBFOX2	22:36152151-36152191	135	16	12.9363	4.35507e-12
CTPS1	1:41473120-41473217	136	16	12.9311	3.33067e-15
VAMP8	2:85806131-85806290	136	15	12.9279	1.62437e-12
NSFL1C	20:1436358-1436364	135	16	12.9235	0.00146269
RAD1	5:34913574-34913683	120	16	12.917	4.117e-07
SNORD50_VPS29	12:110937339-110937351	135	16	12.9052	1.62448e-12
DAZAP2	12:51634654-51634713	136	16	12.8854	1.62448e-12
DAZAP2	12:51634654-51634823	136	16	12.883	1.62448e-12
RP5-890O3.9_CPSF3L	1:1256375-1256473	135	16	12.8806	5.4876e-10
ABTB1	3:127393261-127393296	125	13	12.877	4.4623e-06
NDUFA12	12:95387945-95388033	136	16	12.8639	4.2762e-09
OGT	X:70775039-70775235	136	16	12.8471	1.0273e-10
KIAA1551	12:32123122-32123290	136	16	12.8292	1.246e-06
CLN3_CLN3	16:28497898-28497971	136	16	12.8242	1.81433e-12
HNRNPC	14:21731469-21731741	136	16	12.7897	1.62448e-12
ATP6V1G2-DDX39B_SNORD117_DDX39B	6:31508098-31508441	136	16	12.7653	1.3874e-06
TAPBP	6:33281470-33281641	135	16	12.757	0
DCUN1D3_LYRM1_ERI2	16:20913807-20914039	123	16	12.709	7.2505e-07
CLN3_CLN3	16:28499911-28499983	135	16	12.709	4.0366e-10
SEC16A	9:139341401-139341467	136	16	12.7065	0
NRL_DCAF11	14:24584935-24584958	128	16	12.6829	0.00192184
ARFGAP2	11:47197401-47197474	134	16	12.661	6.22347e-12
RP11-98D18.15_MRPL9	1:151734580-151734588	136	16	12.6537	5.9658e-07
ACP1	2:272036-272065	136	16	12.6434	2.2092e-05
EIF3E	8:109254027-109254142	136	16	12.6357	0
APP	21:27372329-27372497	136	16	12.5647	3.22775e-12
PLAG1_CHCHD7	8:57125320-57125468	133	16	12.5543	4.1716e-07
HNRNPD	4:83277689-83277836	136	16	12.547	0
MTERFD2_SNED1	2:242034544-242035853	120	16	12.5467	0.0030168
CCDC142_TTC31	2:74717151-74717370	132	16	12.5439	0.0014821
AC074117.10_EIF2B4	2:27590980-27591006	136	16	12.5395	0
RP11-303E16.8_GCSH	16:81124205-81124285	136	16	12.5395	0
IST1_RP11-498D10.5	16:71957190-71957283	136	16	12.5313	1.62448e-12
MRPL47_NDUFB5	3:179332758-179332847	136	16	12.5308	5.55112e-16
MAPKAP1	9:128434678-128434922	130	16	12.5096	8.21454e-13
HDLBP_SEPT2	2:242263630-242263656	133	16	12.4962	8.2052e-11
C17orf62	17:80407045-80407168	134	16	12.4808	3.06533e-13
DCAF6	1:168007608-168007726	136	16	12.4692	3.65263e-14
ASPH	8:62559308-62559437	129	16	12.4644	8.7693e-09
RALGAPA1	14:36017713-36017744	122	16	12.4639	0.0046221
RP5-890O3.9_CPSF3L	1:1256375-1256473	135	16	12.4394	5.6511e-10
TXNRD2	22:19864631-19864757	136	16	12.4356	2.83107e-14
PARP2	14:20822967-20822993	120	16	12.4251	1.62448e-12
EIF4B_RP11-983P16.4	12:53421565-53421703	136	16	12.3955	1.62448e-12
SLTM_RNF111_AC025918.2	15:59182479-59182660	136	16	12.3848	1.62437e-12
SCP2	1:53493640-53493743	136	16	12.3779	0
DERL2	17:5383706-5383779	136	16	12.3585	0
SDCCAG3	9:139304541-139304691	131	16	12.3521	1.2034e-11
SUPT20H	13:37596217-37596454	121	16	12.3275	0.000100177
ANKHD1-EIF4EBP3_ANKHD1	5:139914946-139915123	136	16	12.3232	2.10942e-15
PDXDC2P_PDXDC2P	16:70072888-70073003	129	15	12.3188	1.6742e-06
DBNL	7:44092465-44092540	136	16	12.2926	1.62448e-12
SMPD1	11:6412613-6413426	136	16	12.289	1.62448e-12
CYSTM1_PFDN1	5:139680000-139680167	136	16	12.2885	2.2574e-08
IL17RC_RNU6-882P	3:9960018-9960093	136	16	12.2795	1.7568e-07
RFXANK	19:19307771-19307855	136	16	12.2569	1.65068e-12
SMYD2	1:214504292-214507542	136	16	12.2521	1.62448e-12
SLC50A1	1:155109303-155109427	136	16	12.2489	5.61651e-12
WEE2-AS1_SSBP1	7:141438923-141438990	136	16	12.2473	0
KRT8_KRT18	12:53343301-53343362	131	15	12.166	0.027296
NCOA4	10:51584615-51585463	136	16	12.1626	1.62459e-12
PACSIN3	11:47204554-47204620	120	16	12.1603	9.43801e-13
C1orf63	1:25570944-25570989	134	15	12.1511	0.0147199
RP11-97O12.7_MRPS11_MRPL46	15:89011138-89012376	136	16	12.1423	0
SEC11A	15:85230855-85231005	136	16	12.1299	0
PAN2	12:56717820-56717832	134	15	12.1045	3.0663e-08
HNMT	2:138727734-138727787	134	15	12.0843	0.00151856
ZNF276	16:89793733-89793765	136	16	12.0807	2.585e-06
UFD1L	22:19462992-19463018	135	16	12.0753	0
CCDC90B	11:82996595-82997142	127	16	12.0674	6.75e-08
CLDND1	3:98240173-98240286	130	16	12.0607	1.3736e-10
DDX17	22:38883877-38884120	136	16	12.0569	1.1197e-10
AP000347.2_KB-1572G7.2_GUSBP11	22:24029024-24029182	132	14	12.035	1.7966e-08
SNORD6_KIAA1731_SNORA32_TAF1D_SNORA25	11:93466252-93466287	136	16	12.0324	1.7027e-10
TCP1	6:160208774-160208903	136	16	12.0269	0
AP000304.12_ITSN1	21:35199121-35199167	133	16	12.0266	0.00062171
TAF1D_MIR1304_SNORA40	11:93468128-93469306	136	16	12.0088	5.8015e-07
SLC19A1_COL18A1	21:46925748-46925880	136	16	12.0078	0
ANXA11	10:81917396-81917519	136	16	12.0048	0
TMEM69_GPBP1L1	1:46156645-46156782	132	16	12.0008	8.2697e-10
ETFA	15:76587931-76588078	136	16	11.9988	1.11022e-16
TIMM9_RP11-517O13.1	14:58890725-58890813	135	16	11.9899	0
AP006621.9_EPS8L2	11:722090-722165	136	15	11.9797	1.11022e-16
UFD1L	22:19463018-19463125	135	16	11.9728	3.33256e-12
CCDC59	12:82752001-82752457	124	16	11.9647	2.0617e-10
DERL2	17:5386128-5386202	134	16	11.9417	2.5114e-08
RPS25_TRAPPC4	11:118888634-118888763	136	16	11.9274	2.7152e-08
PICALM	11:85701292-85701442	136	16	11.924	0.0025987
RP5-890O3.9_CPSF3L	1:1256375-1256473	135	16	11.9165	4.73455e-12
HNRNPH1	5:179050595-179050636	136	16	11.904	2.3426e-10
CCDC14	3:123665649-123666126	133	16	11.9021	1.62514e-12
SNHG1	11:62621990-62622023	133	16	11.898	2.5628e-07
ACBD4	17:43215088-43215126	135	14	11.8296	9.0356e-08
SEC31A	4:83783686-83783725	128	16	11.8096	5.7532e-05
MUS81	11:65632487-65632585	134	16	11.8054	2.3457e-11
PLOD3	7:100859443-100859477	126	16	11.7977	1.62448e-12
ZNF598	16:2050391-2050409	136	16	11.792	2.233e-09
YIPF3_POLR1C	6:43483343-43483439	136	16	11.7457	0
MON2	12:62959793-62959811	136	16	11.7214	0.00139746
NAT9	17:72771737-72771846	135	16	11.713	5.5364e-11
MTO1	6:74183087-74183377	133	16	11.7068	0
SNURF_SNURF_SNRPN	15:25219457-25219603	136	13	11.7051	1.62537e-12
MAEA	4:1309184-1309388	135	16	11.6911	1.62437e-12
E2F5_C8orf59	8:86131551-86131592	136	16	11.6785	2.7313e-09
E2F5_C8orf59	8:86131464-86131589	136	16	11.66	0.00114299
KIAA0753_TXNDC17	17:6545072-6545252	136	16	11.66	0
CTTN	11:70267575-70267686	136	16	11.6579	3.4471e-07
NKIRAS2_DNAJC7	17:40174416-40174490	134	16	11.6211	0
TMEM106C	12:48359955-48360012	134	16	11.6146	0.000116099
PDIA5	3:122864945-122864964	136	16	11.5931	1.62437e-12
MSTO2P_MSTO1_YY1AP1	1:155638417-155638568	136	16	11.5602	6.66134e-16
FASTK	7:150776009-150776108	136	16	11.5447	6.50846e-12
TCEB1	8:74884311-74884479	136	16	11.5311	2.4047e-06
MMS19	10:99221252-99221379	136	16	11.51	1.62437e-12
SRA1	5:139930754-139931769	136	16	11.5099	8.0052e-09
MBD1	18:47797838-47797910	135	16	11.4985	2.1153e-05
RUFY3	4:71668672-71668700	136	16	11.487	1.55431e-15
ZFR_AC008949.1	5:32380180-32380278	136	16	11.4737	0
HSP90AA1	14:102552301-102552461	136	16	11.4708	0
MIF4GD	17:73264163-73264273	125	16	11.4681	1.1831e-06
MARK3	14:103966492-103966537	136	16	11.4519	0.0036021
MYNN	3:169501264-169501348	120	16	11.4451	0.00025588
HARS	5:140062684-140062804	132	16	11.4448	1.65024e-12
GUSB	7:65444820-65444898	136	16	11.4432	1.88738e-15
ZNF207_RP11-227G15.3	17:30688486-30688534	135	16	11.4293	1.1444e-10
DDX55	12:124094485-124094549	131	16	11.4162	2.56828e-12
IRF3	19:50165204-50165585	136	16	11.4096	1.2175e-10
KIAA0907	1:155891318-155891419	131	16	11.4094	4.0692e-06
WDR26	1:224619178-224619226	127	16	11.404	1.8217e-10
PSMA4	15:78834824-78834987	136	16	11.3893	4.62408e-13
UTP6_CTC-542B22.2	17:30205720-30205800	123	16	11.3773	0
ANAPC11	17:79852342-79852500	136	16	11.3737	0
S100A4	1:153517945-153517994	133	16	11.3709	8.4863e-05
MPV17	2:27535941-27535976	121	16	11.3656	4.44089e-16
PIGF_RHOQ	2:46818941-46819064	134	16	11.3461	4.215e-05
SNORD50_VPS29	12:110937339-110937351	135	16	11.3443	1.62492e-12
SEC16A	9:139339503-139339563	136	16	11.2899	7.84373e-13
RP11-429J17.8_SCRIB	8:144874045-144874083	136	16	11.2837	1.2194e-10
PFDN5	12:53689622-53689725	136	16	11.2678	0
ENKD1	16:67698898-67699071	134	16	11.2502	6.0465e-08
NAT9	17:72771760-72771846	135	16	11.2488	2.9962e-10
PFDN5	12:53689622-53689725	136	16	11.2234	0
EIF4G2_RP11-685M7.5_SNORD97	11:10823207-10823321	136	16	11.2168	7.3303e-11
ATG4D	19:10657747-10657791	124	16	11.2113	2.5959e-07
PPP1R21	2:48732702-48732735	121	16	11.2097	8.6373e-10
C14orf2	14:104381402-104381526	136	16	11.2048	0
C2orf42_TIA1	2:70454866-70454954	121	16	11.1847	0.00095636
REPIN1_ZNF775_RP4-584D14.5	7:150066759-150066957	124	16	11.1541	3.295e-08
PSMD9_RP11-87C12.2	12:122337539-122337795	136	16	11.1503	1.446e-10
MARK4_TRAPPC6A	19:45681350-45681392	135	16	11.1314	1.2303e-06
ACSS2	20:33501898-33501974	136	16	11.1244	1.64319e-05
WDR6_DALRD3	3:49053493-49053519	125	16	11.1182	1.1965e-06
POLR3GL	1:145459651-145459781	135	16	11.1168	1.4164e-11
RBM42	19:36123999-36124002	136	16	11.1128	2.2608e-05
HNRNPH1	5:179050037-179050188	136	16	11.1087	0
IMMP1L	11:31482172-31482261	124	16	11.1025	0.0027622
RPLP0	12:120638532-120638634	136	16	11.0962	0
FAM35A	10:88911589-88912636	132	16	11.0794	1.62448e-12
RPLP0	12:120638521-120638634	136	16	11.0786	0
D2HGDH	2:242683036-242683053	136	16	11.071	0.000121759
ARFGAP2	11:47197401-47197474	134	16	11.0574	6.1651e-11
PIGP	21:38444444-38444610	132	16	11.0525	1.6845e-06
MRPL33	2:27995540-27995559	136	16	11.0364	3.1808e-09
N4BP2L2	13:33109905-33111164	132	16	11.0321	2.92044e-12
CARM1	19:11032050-11032290	136	16	11.0213	2.8992e-07
YTHDF2	1:29068914-29070498	136	16	11.0055	1.62981e-12
GORASP1	3:39142237-39142278	129	16	11.002	1.62448e-12
NAT9	17:72771760-72771846	135	16	11.0011	2.4442e-10
DHRSX	X:2326785-2326854	135	16	10.9962	0.0029403
MGC10955_BOLA3	2:74369398-74369487	136	16	10.9863	6.7026e-07
PPARA	22:46594238-46594241	120	15	10.978	0.0056974
MAPKAP1	9:128246721-128246862	136	16	10.9707	4.6234e-11
TMEM106C	12:48359064-48360012	136	16	10.962	2.84e-08
TMEM254	10:81845986-81846014	129	16	10.9359	9.5172e-05
LETMD1	12:51445874-51445990	136	16	10.9259	0.00152079
CLN3_CLN3	16:28502802-28502881	134	16	10.9245	1.7716e-10
ANAPC11	17:79852342-79852462	136	16	10.8892	0
ALKBH6_AC002116.8	19:36501547-36501585	133	16	10.8814	3.1931e-07
UBE2D3	4:103748748-103749100	136	16	10.8666	8.4311e-08
C16orf58	16:31504787-31504845	136	16	10.8497	3.0328e-08
PCBP2_RP11-793H13.8	12:53858543-53858636	136	16	10.8336	0
GSTM4	1:110199901-110200293	135	15	10.8261	0
RIOK3	18:21047362-21047490	131	16	10.8211	0
MAEA	4:1321414-1321491	136	16	10.7667	4.44089e-16
BOD1	5:173040133-173040258	135	16	10.7658	1.62514e-12
AASS	7:121721553-121721649	136	13	10.7259	1.124e-08
LRRC28	15:99874127-99874222	125	15	10.6904	8.6866e-08
AARSD1_PTGES3L-AARSD1	17:41105740-41105795	136	16	10.6889	3.44103e-12
ACTN1	14:69345705-69345786	136	16	10.6858	5.4137e-09
LLfos-48D6.1_SPPL2B	19:2351592-2351655	136	16	10.6807	0.000195249
FIP1L1	4:54257596-54257665	120	16	10.6777	0.00136457
SAT1_RP13-314C10.5	X:23802410-23802520	136	16	10.648	0.00059884
RPS9	19:54710143-54710592	136	16	10.6321	1.11022e-16
MVK	12:110017606-110017751	136	16	10.6272	1.5886e-10
PLSCR1	3:146239619-146239768	135	16	10.6085	2.5663e-07
TRAPPC3	1:36605669-36605767	135	16	10.5751	2.03615e-12
LLGL2	17:73570191-73570341	136	16	10.5661	0.00012297
AMPD2	1:110163535-110163888	123	16	10.5621	1.1788e-10
EXOC7	17:74087223-74087316	127	16	10.5558	0.004637
SMPDL3A	6:123122454-123122551	124	13	10.5453	7.6621e-07
ZMIZ2	7:44796545-44796641	128	16	10.539	9.5503e-10
TSPAN17	5:176079743-176079914	123	16	10.5269	3.40472e-12
ZFAND1	8:82633461-82633483	128	16	10.5097	1.62448e-12
AHSA2	2:61410681-61410797	136	16	10.5014	6.1214e-05
TANK_AC009299.2	2:162087481-162088062	136	16	10.4883	4.75631e-12
ASCC2	22:30228233-30228331	132	16	10.4855	8.99281e-15
ACAD10	12:112183947-112184088	131	15	10.4807	6.369e-08
TANK_AC009299.2	2:162087481-162088062	136	16	10.4699	4.76363e-12
SEC31A	4:83782783-83782861	128	16	10.4675	2.3639e-09
C17orf62	17:80407049-80407168	134	16	10.4634	9.9616e-11
ACTR1A	10:104241757-104241932	136	16	10.4594	1.62448e-12
TNK2	3:195596984-195597076	136	16	10.4548	2.0078e-06
RPS9	19:54710143-54710330	136	16	10.4386	0
ANKHD1-EIF4EBP3_ANKHD1	5:139914946-139915123	136	16	10.4219	2.22045e-15
DPP7	9:140007657-140007739	136	14	10.4209	7.9567e-05
MGEA5	10:103551110-103551196	133	16	10.4127	3.0098e-07
GORASP1	3:39141945-39141994	132	16	10.4042	3.9997e-11
DNAJC4_RP11-783K16.14	11:63999901-64000086	136	16	10.3812	3.25751e-11
REEP5_CTC-487M23.8	5:112238076-112238215	136	16	10.3785	0
NT5C3B	17:39985041-39985204	136	15	10.367	1.63525e-12
UFD1L	22:19462992-19463125	135	16	10.3631	5.9763e-08
TMEM126B_DLG2	11:85340175-85340306	132	16	10.3555	1.4073e-11
MRPS33	7:140710417-140710460	134	16	10.3454	4.45677e-12
HNRNPH3	10:70098259-70098399	136	16	10.3224	0.00035503
RNF126	19:651610-651915	136	16	10.2334	2.1618e-10
APEH	3:49711921-49712054	134	16	10.2269	1.514e-08
SETX	9:135144789-135144876	130	16	10.2267	0.00013791
MRI1	19:13876767-13876943	131	16	10.2257	4.9091e-06
SLC50A1	1:155109303-155109427	136	16	10.2116	5.7533e-09
DNAJC19	3:180704785-180704810	136	16	10.2092	6.13731e-13
PLXNB1	3:48461632-48461666	128	14	10.1922	0.00042244
AP003419.11_POLD4	11:67120773-67120834	136	16	10.1713	1.35769e-12
AIP	11:67254476-67254656	133	15	10.1681	1.62437e-12
FAM193B	5:176963487-176963746	136	16	10.1664	9.157e-10
ACP6	1:147124251-147124352	128	16	10.1599	1.8731e-11
FPGS	9:130569251-130569366	136	16	10.1594	1.64213e-12
CYB5A	18:71928149-71928179	136	16	10.1524	0
ATP6AP2	X:40456500-40456596	129	16	10.1445	0
WIPI2	7:5232748-5232976	120	16	10.1425	2.4136e-10
C11orf73	11:86017286-86017524	134	16	10.1306	7.5898e-09
ITPA	20:3193814-3193872	135	16	10.1227	1.26232e-13
LPIN3	20:39981245-39981277	123	16	10.1191	0.000178439
CRELD1	3:9982700-9982710	136	16	10.112	6.4549e-11
ABHD14A-ACY1_ACY1_ABHD14A_ABHD14B	3:52012274-52012390	132	15	10.1058	0.00028279
POT1	7:124469307-124469396	121	16	10.0947	4.0824e-09
CS_RP11-977G19.10	12:56680404-56680429	133	16	10.0735	0
TBC1D9B	5:179292885-179292888	136	16	10.0051	1.62459e-12
KLC1_RP11-73M18.2	14:104145645-104145882	136	16	10.002	8.1679e-10
CNBP	3:128890476-128890497	136	16	-10.0051	2.1003e-11
IDNK	9:86243787-86243874	132	13	-10.0111	0.0117976
CCDC90B	11:82989768-82989872	136	16	-10.0215	2.6685e-09
TCEB1	8:74876721-74876860	136	16	-10.0242	1.62648e-12
ARMC7_NT5C	17:73127059-73127139	136	16	-10.0312	0.00118076
MPPE1_GNAL	18:11886711-11886777	135	16	-10.0551	2.0945e-08
DHRS11	17:34956099-34956192	128	16	-10.0573	4.0005e-06
Y_RNA_ACAA1	3:38167652-38167832	136	16	-10.0753	1.50107e-05
ATXN2	12:111891480-111891649	135	16	-10.0861	5.0264e-10
MGST2	4:140616350-140616421	136	15	-10.0869	7.65144e-12
STX16-NPEPL1_STX16	20:57244357-57244509	136	16	-10.0932	5.7423e-10
NDUFS3_CELF1_PTPMT1	11:47591251-47591443	136	16	-10.0982	1.1261e-07
ABHD4	14:23074692-23074772	128	16	-10.108	1.62437e-12
LYPLAL1	1:219366423-219366593	133	16	-10.109	9.7134e-10
TARDBP	1:11076900-11077064	136	16	-10.1094	3.77476e-14
ZGPAT_ARFRP1	20:62338350-62338449	135	16	-10.1106	2.2526e-09
MFSD12_AC005786.7	19:3546252-3546423	136	16	-10.1131	4.0158e-06
TBRG1	11:124496368-124496505	136	16	-10.125	0.0044358
AC013394.2_CHD2	15:93426814-93427008	136	16	-10.1419	8.2061e-07
MARK2	11:63675731-63675776	134	16	-10.1443	5.0543e-07
C9orf3	9:97822975-97823092	136	16	-10.1445	0
POLR3GL	1:145457934-145458003	136	16	-10.1454	2.22045e-14
TNK2	3:195594039-195594135	136	16	-10.1457	9.6813e-05
ACP6	1:147124394-147124450	128	16	-10.1486	2.1782e-11
KHNYN_SDR39U1	14:24911383-24911551	136	16	-10.1519	0.0184614
CLK2	1:155238498-155238586	134	16	-10.1532	1.60381e-05
RHOT2_WDR90	16:718357-718411	136	16	-10.1553	9.12359e-12
SZRD1	1:16719725-16719977	136	16	-10.1607	1.62448e-12
ASCC2	22:30221610-30221769	134	16	-10.1634	6.7895e-10
HDAC10_MAPK12	22:50688855-50688952	134	16	-10.1661	3.5785e-05
TTC38	22:46688099-46688225	136	16	-10.168	6.0105e-05
C11orf54_TAF1D	11:93480462-93480614	133	16	-10.1789	5.9277e-07
TPM2	9:35684804-35685136	136	16	-10.1908	0.02514
SYNGR2	17:76167590-76167819	136	16	-10.2185	5.1905e-10
HERPUD2	7:35709824-35709938	122	16	-10.2338	2.7664e-10
HCFC1R1_THOC6	16:3073413-3073531	136	16	-10.2351	1.5608e-06
SRSF7	2:38976039-38976315	136	16	-10.2397	1.62437e-12
FAM3A	X:153736141-153736192	136	16	-10.2427	2.948e-07
DNAAF2	14:50094729-50094873	122	16	-10.263	0.003198
KRTCAP2_RP11-201K10.3_TRIM46	1:155145213-155145696	136	16	-10.2641	0.024499
BOD1	5:173036240-173036437	135	16	-10.2675	2.66009e-12
EIF2B5_EIF4G1	3:184033919-184034006	125	16	-10.2721	1.24345e-14
EIF4E2	2:233422593-233422728	136	16	-10.2799	7.9311e-08
MRPL55	1:228296137-228296175	136	16	-10.2859	1.2155e-10
CHID1	11:908541-908645	135	16	-10.2924	3.5916e-09
PCK2_NRL	14:24569203-24569422	136	16	-10.2968	3.5414e-05
MPHOSPH8	13:20244979-20245104	136	16	-10.3022	0.00105652
VEGFA	6:43749692-43749824	136	16	-10.3044	5.8304e-05
PC	11:66721719-66721907	120	16	-10.3155	1.62448e-12
NR1H3	11:47283097-47283277	136	16	-10.3221	0.0003596
LINC00035_ABHD11	7:73151258-73151440	134	16	-10.3265	1.1249e-07
PMPCB_DNAJC2	7:102967778-102967825	122	16	-10.3302	1.3266e-09
PCK2_NRL	14:24572368-24572464	136	16	-10.3342	6.3557e-05
HNRNPH3	10:70098259-70098399	136	16	-10.3434	5.6547e-08
LLGL2	17:73570191-73570341	136	16	-10.3547	0.00058211
MIR4761_COMT	22:19951632-19951822	136	16	-10.3582	0
WAC	10:28884661-28884970	134	16	-10.3625	1.64811e-05
BCAR1	16:75270725-75270896	135	16	-10.37	4.296e-10
SCMH1	1:41499654-41499720	136	16	-10.3825	3.6931e-05
AP001062.7_C21orf2	21:45753943-45755640	135	16	-10.3852	1.69942e-12
AMACR_RP11-1084J3.4	5:34004678-34004839	126	16	-10.3871	0.0027835
DVL2_ACADVL	17:7127802-7127871	136	16	-10.3885	0
ST5_RPL27A	11:8724267-8725158	132	15	-10.3898	4.87932e-12
NAGK	2:71303733-71303831	136	16	-10.3907	1.043e-10
ARL6IP4_ABCB9_RP11-197N18.2	12:123466117-123466202	136	16	-10.4022	1.55986e-05
AKR1A1	1:46027460-46027550	136	16	-10.4055	0
ATPAF2	17:17924436-17924552	135	16	-10.4093	6.4355e-09
AC135048.1_HSD3B7_SETD1A	16:30996780-30997145	134	15	-10.4297	1.77047e-12
ATG12	5:115173324-115173461	134	16	-10.4418	2.0323e-10
IRF3	19:50163969-50164085	133	16	-10.4628	2.8535e-07
RNF126	19:651691-651855	136	16	-10.4629	5.8093e-11
NT5C3B	17:39983677-39983878	136	15	-10.4651	2.75335e-14
TCEB1	8:74871999-74872053	136	16	-10.4743	3.2918e-07
MTIF3	13:28019224-28019274	135	16	-10.482	3.7072e-05
FOXP4	6:41557700-41557736	135	16	-10.4829	4.437e-09
MTSS1L	16:70708335-70708431	136	16	-10.4933	0.0033434
P4HB	17:79813017-79813155	136	16	-10.4957	1.62448e-12
TMCO3	13:114201614-114201694	124	16	-10.4959	1.1152e-09
RAD51L3-RFFL_RFFL	17:33341758-33341782	131	16	-10.5001	5.7227e-05
PLD3	19:40871492-40871837	136	16	-10.5091	0.0029649
SLC25A23	19:6438457-6438545	127	16	-10.5098	1.64158e-12
SNORA63_SNORA4_EIF4A2	3:186506205-186506209	129	16	-10.5098	6.9935e-09
SARM1_SLC46A1	17:26729255-26729339	131	16	-10.5154	0.00021764
NUBP2_SPSB3	16:1836537-1836656	136	16	-10.5168	2.1447e-06
FIS1	7:100887287-100887420	136	16	-10.5324	0.00017748
COPS7B_RP11-690I21.1	2:232656442-232656518	133	16	-10.5325	4.16922e-12
ARFGAP2	11:47195309-47195391	136	16	-10.5383	1.6184e-06
MCCC2	5:70922466-70922580	129	16	-10.5518	2.0796e-05
PRKAG1_RP11-386G11.5	12:49399525-49399635	127	16	-10.5606	3.5858e-07
GUK1	1:228328824-228328989	136	16	-10.5618	1.42664e-13
RUSC1-AS1_FDPS	1:155289647-155289719	136	16	-10.563	7.0487e-07
STRADA_RP11-51F16.8	17:61784606-61784778	136	16	-10.5634	0.00063816
SLC25A23	19:6438457-6438545	127	16	-10.5678	8.73923e-12
LYPLAL1	1:219366423-219366471	128	16	-10.5686	3.9278e-05
SNORD6_KIAA1731_SNORA32_TAF1D_SNORA25	11:93465409-93465479	133	16	-10.5796	0.000124682
MFF_AC097662.2	2:228195310-228195562	136	16	-10.5881	3.1129e-09
POR_TMEM120A	7:75616855-75616920	136	16	-10.59	0.00079523
RAP1GAP	1:21930327-21930405	133	13	-10.5928	0
LINC00035_ABHD11	7:73151550-73151690	132	16	-10.5944	0.0026227
CASC3	17:38323623-38323750	121	16	-10.6089	0
ANG_AL163636.6_RNASE4	14:21161705-21161809	136	13	-10.6263	0.03282
DMTF1	7:86823999-86824144	136	16	-10.6417	2.126e-07
FAM211B_GGT1_SNRPD3	22:24984297-24985361	134	14	-10.6428	2.4186e-05
PECR_MREG	2:216903913-216904083	124	15	-10.646	0.027361
BRD8	5:137495243-137495288	136	16	-10.6487	1.4716e-08
MIB2_RP11-345P4.9	1:1558810-1559079	135	15	-10.6523	4.248e-05
CRYZ	1:75190394-75190518	136	16	-10.66	7.54952e-14
TNK2	3:195596367-195596412	135	16	-10.6667	3.7891e-07
EXOSC1	10:99202993-99203068	134	16	-10.6789	1.62659e-12
SNHG1	11:62621990-62622023	133	16	-10.6931	9.8447e-07
CCDC152_SEPP1	5:42806997-42807210	136	13	-10.6944	4.02633e-12
LINC00035_ABHD11	7:73151258-73151550	134	16	-10.7007	1.4599e-08
CRELD1	3:9985585-9985779	136	16	-10.7008	2.03171e-14
ZNF114_CARD8	19:48726975-48727125	130	15	-10.702	0.000136218
ABCB8	7:150737354-150737388	134	16	-10.7075	0.00064335
AL158151.2_CRAT	9:131871457-131871556	135	14	-10.713	0.000141812
POFUT2	21:46702718-46702853	120	16	-10.7144	1.62448e-12
SLC25A23	19:6453991-6454099	128	16	-10.7155	0.000158945
UBAP2L	1:154241235-154241430	133	16	-10.7184	2.041e-05
CCDC152_SEPP1	5:42808252-42808468	136	13	-10.7184	3.82139e-12
DRG2	17:18003882-18003973	135	16	-10.7214	5.4001e-09
MRPL55	1:228296137-228296722	136	16	-10.7221	1.1271e-06
PCBP1-AS1	2:70310669-70310819	135	16	-10.7235	6.2347e-05
CIRBP_CIRBP-AS1	19:1270865-1271035	136	16	-10.7809	4.16556e-13
ARMC7_NT5C	17:73127059-73127275	136	16	-10.7901	0.00049982
RP11-1012A1.4_RDH11	14:68151731-68151882	136	16	-10.8014	3.67595e-13
CCDC152_SEPP1	5:42808252-42808468	136	13	-10.8018	3.63154e-12
RP11-1012A1.4_RDH11	14:68151731-68151921	136	16	-10.8074	3.65263e-13
HHLA3	1:70832615-70832667	133	16	-10.8162	0.000175399
SHBG_SAT2	17:7530260-7530362	136	16	-10.825	0.041464
G6PC3	17:42152336-42152677	134	16	-10.827	7.9073e-07
LSR	19:35753448-35753595	136	14	-10.8316	4.7424e-09
ARFGAP2	11:47195309-47195466	136	16	-10.8391	1.5222e-06
ENOSF1	18:677742-677872	136	16	-10.8428	1.4107e-09
CRLF1_C19orf60	19:18700288-18700493	136	16	-10.8435	1.63058e-12
LUC7L2_C7orf55-LUC7L2_RP11-634H22.1	7:139059146-139059217	130	16	-10.853	1.62448e-12
SPEG_RP11-316O14.1_GMPPA_AC053503.11	2:220364682-220364737	135	16	-10.8704	4.01723e-12
CPSF7	11:61187941-61188002	136	16	-10.8794	4.45211e-12
ACIN1	14:23536522-23537880	133	16	-10.8885	9.47065e-12
RP11-598P20.5_FNTA	8:42919243-42919358	131	16	-10.9034	1.3317e-10
VRK3	19:50512492-50512642	135	16	-10.9054	0.000157912
SNURF_SNURF_SNRPN	15:25219544-25219603	136	13	-10.9057	1.62603e-12
SAFB2	19:5616138-5616142	130	16	-10.911	0
ZBTB8OS	1:33099245-33099328	136	16	-10.9228	1.1497e-09
MAPKAPK2	1:206905382-206905919	136	16	-10.9318	6.2241e-07
POLDIP3	22:42997975-42998113	134	16	-10.9377	5.62084e-12
TSPAN9	12:3192818-3192885	134	16	-10.9504	9.3578e-09
MTSS1L_FLJ00418	16:70708208-70708431	136	16	-10.9551	1.93264e-05
KARS	16:75670351-75670445	131	16	-10.9606	1.64113e-12
CAMKK2	12:121686408-121686537	131	16	-10.9647	0.00011919
ATG12	5:115176193-115176309	132	16	-10.9815	1.62437e-12
HSP90AB1	6:44216353-44216513	136	16	-10.9838	0
SLC39A13	11:47434950-47435058	136	16	-10.9866	0.00027662
GUSB	7:65444385-65444528	136	16	-10.9926	1.2918e-10
INTS3	1:153733495-153733585	134	16	-11.0116	5.21094e-12
BX936347.1_ATP6AP1	X:153657520-153660003	128	16	-11.0162	1.62448e-12
NUDT22_TRPT1	11:63995039-63995138	136	16	-11.0167	4.8695e-06
CLN3_CLN3	16:28498982-28499062	135	16	-11.0249	5.7031e-11
INO80E	16:30014970-30015035	136	16	-11.0257	0
LETMD1	12:51450132-51450285	134	16	-11.0279	3.8082e-05
CTAGE5_RP11-407N17.3	14:39790131-39790260	136	16	-11.0332	0.0004194
CENPV_PIGL	17:16252453-16252647	135	16	-11.0354	1.60679e-05
HARS	5:140058646-140058712	134	16	-11.0361	1.9435e-10
FBXO17_CTC-360G5.8_SARS2	19:39437207-39438058	136	16	-11.0437	1.62437e-12
RBM10	X:47039278-47039439	134	16	-11.0497	1.554e-07
OXA1L_CTD-2555K7.2	14:23236526-23236618	136	16	-11.0569	0
IL6R	1:154408444-154408586	122	13	-11.0753	2.4254e-10
KMT2C	7:151842237-151842249	132	16	-11.0838	1.1733e-07
RAB3D_TMEM205_CCDC159	19:11456802-11456883	136	16	-11.0869	9.0707e-07
PPP6R2	22:50875416-50875497	136	16	-11.0886	0.00196219
PDAP1_BUD31	7:99007659-99007792	135	16	-11.1078	2.7166e-12
C14orf2	14:104381402-104381526	136	16	-11.112	0
RPS5	19:58904725-58904854	136	16	-11.133	1.62448e-12
JPX	X:73214674-73214796	128	16	-11.1366	0.00025908
SNURF_SNURF_SNRPN	15:25219533-25219603	136	13	-11.1374	1.62492e-12
RPLP0	12:120638532-120638694	136	16	-11.143	1.11022e-16
RP11-322E11.6_INO80C	18:33060416-33060527	121	15	-11.153	0.0050592
ERI3	1:44804716-44804988	135	16	-11.1554	9.05553e-12
SIK2_PPP2R1B	11:111608171-111608293	136	15	-11.1595	1.8975e-07
NFIC	19:3456547-3456633	136	16	-11.1654	3.9033e-08
BIRC6	2:32815872-32816045	134	16	-11.1671	1.90215e-12
RP11-134L10.1_C7orf49	7:134853500-134853720	121	16	-11.1776	2.4146e-10
FRG1	4:190876191-190876306	135	16	-11.1864	1.80548e-05
RRNAD1	1:156703844-156704285	136	16	-11.1914	1.54813e-05
ERI3	1:44804716-44804994	135	16	-11.1946	2.004e-05
MRPS10	6:42181857-42181930	129	16	-11.2043	0.0004562
RPH3AL	17:131558-131645	126	13	-11.2076	1.1366e-09
MAPK14	6:36063763-36063843	136	16	-11.2213	1.7563e-11
PSMA4	15:78836531-78836609	136	16	-11.2218	1.11589e-12
HNRNPUL1_TGFB1	19:41811550-41811772	136	16	-11.2242	2.58049e-12
RP11-773D16.1	10:81568514-81568588	134	16	-11.2305	0.00046491
EFHD2	1:15753645-15753780	136	16	-11.2321	4.0334e-05
PTCD1_ATP5J2_CPSF4_ATP5J2-PTCD1	7:99051663-99051666	135	16	-11.2342	5.0677e-07
QDPR	4:17510893-17510986	136	16	-11.2361	0
FAM207A	21:46393111-46393180	136	16	-11.2378	1.62032e-05
ILF3	19:10798021-10798384	136	16	-11.2404	3.33067e-16
INO80E	16:30015888-30015978	136	16	-11.2429	3.8096e-10
RP11-315D16.2_CLN6	15:68503893-68504012	134	16	-11.253	9.6453e-11
XXcos-LUCA11.5_NPRL2_CYB561D2	3:50389439-50389477	136	16	-11.2615	1.0277e-10
AC135048.1_HSD3B7_SETD1A	16:30996845-30997145	134	15	-11.2648	1.66855e-12
PILRB_STAG3L5P-PVRIG2P-PILRB_PVRIG2P	7:99950832-99950893	133	16	-11.2657	5.03986e-12
C2orf74_AC016747.3_KIAA1841	2:61389976-61390090	129	16	-11.2749	5.9324e-05
IL17RC_RNU6-882P	3:9960183-9960293	136	16	-11.2833	3.0235e-11
CDC25B	20:3781389-3781512	127	16	-11.2835	1.354e-06
GAK	4:860289-860322	136	16	-11.2845	7.3209e-08
SETD2	3:47122405-47122573	134	16	-11.2879	2.15905e-12
PHF14	7:11101417-11101468	136	16	-11.3054	5.8949e-05
ZNF76	6:35261527-35262232	136	16	-11.3059	0.00083589
IRF3	19:50163969-50164101	136	16	-11.3076	2.7176e-10
TMEM175_GAK	4:941496-941680	136	16	-11.3115	1.6585e-06
ILKAP	2:239103422-239103445	132	16	-11.3187	4.6728e-10
CLN3_CLN3	16:28498982-28499062	135	16	-11.3441	2.3145e-11
LEPR_LEPROT	1:65895613-65895731	127	16	-11.3446	1.62448e-12
CRLF1_C19orf60	19:18700222-18700493	136	16	-11.3579	2.233e-05
MTERFD2_SNED1	2:242033691-242033847	133	16	-11.3737	0.00038447
C9orf142	9:139887091-139887152	136	16	-11.383	0
MAP3K4	6:161529982-161530073	122	16	-11.3926	9.2535e-10
MORF4L2	X:102933426-102933548	136	16	-11.3953	0
SPNS1_RP11-264B17.3	16:28993221-28993377	136	16	-11.416	0.00059813
IST1_RP11-498D10.5	16:71958675-71958720	136	16	-11.4423	1.62437e-12
PTBP1	19:806407-806556	136	16	-11.4456	6.0427e-07
NADK2	5:36208726-36208792	136	16	-11.4495	0.0020215
ARL16	17:79650042-79650156	134	16	-11.463	0.00026442
NR1H3	11:47281959-47282226	136	16	-11.4633	0.00132392
INO80E	16:30012532-30012851	136	16	-11.4641	2.08722e-14
CSNK1D_SLC16A3	17:80213304-80213453	136	16	-11.4718	2.8582e-11
HDDC2_TPD52L1	6:125574862-125574901	135	13	-11.489	0.00025919
ATG12	5:115176193-115176309	132	16	-11.4931	1.62448e-12
C9orf89	9:95870098-95870109	133	16	-11.5258	4.1029e-05
RAB3D_TMEM205_CCDC159	19:11456802-11456883	131	16	-11.5306	2.1274e-08
TMEM175_GAK	4:941903-941942	136	16	-11.5405	1.5048e-06
MTFR1L_AL020996.1_RP1-317E23.3_RP1-317E23.6	1:26149486-26149619	135	16	-11.5463	1.0081e-08
ARHGEF40	14:21555478-21555622	135	16	-11.5634	1.78251e-05
MAEA	4:1316168-1316291	135	16	-11.5642	1.62448e-12
RRP7A	22:42914010-42914153	134	16	-11.5647	1.62448e-12
RUFY3	4:71659481-71659501	121	16	-11.5713	0.00070279
SRSF11_LRRC40	1:70687294-70687522	132	16	-11.5759	1.11022e-16
CCDC152_SEPP1	5:42804757-42804875	136	13	-11.5827	3.9823e-05
ARFIP2	11:6501552-6501653	133	16	-11.5866	3.0171e-10
MVK	12:110017606-110017751	136	16	-11.591	6.8798e-10
ARL6IP4_ABCB9_RP11-197N18.2	12:123466117-123466141	136	16	-11.5942	1.2873e-06
TSC2	16:2132436-2132505	135	15	-11.5954	1.62448e-12
TAF1D_MIR1304_SNORA40	11:93469306-93469455	136	16	-11.6014	9.3757e-07
ITPA	20:3193903-3194029	135	16	-11.6025	1.62437e-12
C14orf2	14:104381402-104381526	136	16	-11.6029	0
IDS_IDS	X:148608474-148608607	129	16	-11.6079	1.3604e-09
MYO19	17:34857691-34857741	133	16	-11.6109	1.62448e-12
ETFA	15:76584959-76585041	136	16	-11.6135	0
ACOX1	17:73969705-73969866	120	16	-11.6142	2.0232e-05
GUSB	7:65444385-65444528	136	16	-11.6319	1.1946e-13
SNURF_SNURF_SNRPN	15:25213078-25213229	136	13	-11.6319	5.05551e-12
PMF1-BGLAP_PMF1_SLC25A44	1:156195347-156195459	136	16	-11.6441	0
CMTR1	6:37443188-37443692	132	16	-11.6587	0
IL17RC	3:9974503-9974542	136	16	-11.6765	0.00043647
GLYR1	16:4871547-4871598	130	16	-11.6786	1.55431e-15
NAPA_NAPA-AS1	19:48003889-48004006	136	16	-11.6842	1.33227e-15
TIMM9_RP11-517O13.1	14:58878624-58878689	135	16	-11.7019	0
SEPW1	19:48283990-48284006	136	16	-11.7144	0
FDPS	1:155279854-155279996	136	16	-11.7193	0
SCAP	3:47467486-47467659	135	16	-11.7257	1.66722e-12
CYB5A	18:71922975-71923010	136	16	-11.7264	1.11022e-16
ACSS2	20:33508808-33508942	120	16	-11.7276	5.6351e-05
NUBP2_SPSB3	16:1836537-1836656	136	16	-11.7278	1.53769e-05
GPR137	11:64055192-64055418	121	16	-11.7478	6.6616e-08
ENTPD6	20:25201867-25201969	135	16	-11.7594	0.00057607
CTB-179K24.3_MARK4_GEMIN7	19:45583164-45583287	124	16	-11.7623	1.82483e-05
WBP1_INO80B	2:74686564-74686689	136	16	-11.7691	0
SLC22A18	11:2940536-2940637	136	16	-11.7743	0.00071834
RP11-216L13.17_TMEM141	9:139686398-139686482	136	16	-11.7759	6.5573e-08
FAM193B	5:176958953-176959201	136	16	-11.7841	2.3084e-07
SUGT1	13:53235609-53235705	136	16	-11.796	0.00027829
RPLP0	12:120636356-120636434	136	16	-11.8144	0
RPRD1A	18:33613670-33613800	120	16	-11.8147	1.7099e-10
MORF4L2	X:102933426-102933577	136	16	-11.8176	0
IL17RC	3:9962608-9962653	136	16	-11.8206	6.4198e-11
RPLP0	12:120636356-120636573	136	16	-11.8269	0
TMX2-CTNND1_TMX2	11:57506135-57506511	135	16	-11.8365	1.62448e-12
ZNF655_GS1-259H13.10	7:99159990-99160117	122	15	-11.8385	0.00040073
IST1_RP11-498D10.5	16:71958671-71958720	136	16	-11.8472	0
ASL	7:65546789-65546984	136	16	-11.8493	1.0299e-09
HNMT	2:138724666-138724956	134	15	-11.8509	0.0029025
STK3	8:99607088-99607273	124	16	-11.8518	1.62448e-12
C1orf43	1:154186368-154186422	136	16	-11.8579	9.7908e-05
CDC42SE1	1:151029131-151029262	133	16	-11.863	0
MARK4_TRAPPC6A	19:45668384-45668452	135	16	-11.8636	8.1348e-05
DCXR_RP13-650J16.1	17:79995325-79995417	136	16	-11.884	1.4058e-08
PIGT	20:44048112-44048230	133	16	-11.8842	2.4701e-07
APOE	19:45409843-45409924	136	13	-11.9002	6.9785e-08
APTX	9:32987541-32987844	136	16	-11.906	1.6247e-12
TANGO2	22:20050860-20050965	127	16	-11.9104	4.4808e-06
C1orf43	1:154186932-154187050	136	16	-11.9263	7.0861e-09
ARFGAP2	11:47193831-47193884	136	16	-11.9347	1.62437e-12
FAHD2A	2:96071024-96071150	136	16	-11.9399	1.1368e-06
CNP	17:40120090-40120758	132	16	-11.9472	1.65756e-12
MTO1	6:74181182-74181280	130	16	-11.9634	1.62448e-12
ARHGEF1	19:42401463-42401475	132	16	-11.9776	0
UBE2D3	4:103748583-103748748	136	16	-11.9854	9.977e-07
CDK2AP2	11:67275330-67275471	136	16	-12.0041	3.33067e-16
CSNK1D_SLC16A3_AC132872.2	17:80223561-80223672	133	16	-12.0092	1.62448e-12
CDC25B	20:3783376-3783455	135	16	-12.0201	0
FAM193B	5:176980168-176980351	133	16	-12.0251	1.8769e-07
PPIL3_RNU6-312P	2:201749984-201750090	130	16	-12.03	2.7616e-11
SLC2A8	9:130164835-130165032	136	16	-12.033	3.7124e-07
STAT6	12:57501387-57501526	136	16	-12.0394	2.8537e-09
NBPF9	1:144821973-144822084	128	16	-12.0501	0.0069387
AKR1A1	1:46027460-46027550	136	16	-12.0518	0
RP11-155D18.12_RP11-155D18.14_ABHD14B	3:52005475-52005714	136	16	-12.0591	0
CDK5	7:150752839-150752935	130	16	-12.0644	0.00038238
PMF1-BGLAP_PMF1_SLC25A44	1:156195347-156195459	136	16	-12.0659	1.62448e-12
SRSF4	1:29486375-29486570	136	16	-12.0851	1.62448e-12
CAST	5:96064856-96064913	134	16	-12.0944	6.5849e-07
ENTHD2_C17orf89	17:79213478-79213743	136	16	-12.1072	2.1263e-06
HNRNPH1	5:179050636-179051317	136	16	-12.1219	7.71305e-12
AKIP1	11:8938833-8938914	133	16	-12.1227	0.0058232
TMEM175_GAK	4:941903-941942	136	16	-12.1274	1.491e-06
CCNL1_Y_RNA	3:156874799-156874872	136	16	-12.1371	3.6956e-06
RP11-216L13.17_TMEM141	9:139686077-139686229	136	16	-12.1399	0
PIGT	20:44048143-44048230	133	16	-12.1532	1.0119e-07
MARK2	11:63673559-63673586	124	16	-12.155	7.4389e-07
APTX	9:32988080-32988122	134	16	-12.1641	3.1794e-07
NAPA_NAPA-AS1	19:48003889-48004006	136	16	-12.1644	1.62526e-12
PTS	11:112101348-112101405	136	16	-12.1728	1.07203e-12
MIA-RAB4B_RAB4B-EGLN2_RAB4B	19:41289682-41289745	136	16	-12.1745	2.6402e-06
CAMK2G	10:75579289-75579403	121	16	-12.1796	1.3452e-06
WBP2	17:73847648-73847757	136	16	-12.2061	0
CIRBP_CIRBP-AS1	19:1270926-1271035	136	16	-12.2141	4.2374e-06
AP006621.9_EPS8L2	11:721902-721991	136	15	-12.2198	3.33067e-16
C9orf114_ENDOG	9:131586025-131586173	136	16	-12.2273	1.0162e-06
AC135048.1_HSD3B7_SETD1A	16:30996973-30997145	134	15	-12.2293	1.62448e-12
PSMC5_FTSJ3	17:61905210-61905283	136	16	-12.2452	0
DBNL	7:44096355-44096502	136	16	-12.2498	0
LENG8	19:54964724-54964835	136	16	-12.2528	3.9968e-15
PIGT	20:44048143-44048230	133	16	-12.2547	1.2193e-07
PRMT7	16:68382244-68382334	124	16	-12.2629	0.00032303
HDAC10_MAPK12	22:50687259-50687288	134	16	-12.2696	4.4674e-05
COL27A1	9:116956683-116956737	126	13	-12.2767	0.0042391
VPS16	20:2842699-2842710	131	16	-12.277	1.9747e-09
PSMC5_FTSJ3	17:61905188-61905283	136	16	-12.2862	0
SYNGR2	17:76167590-76167730	136	16	-12.2918	0
SEC11A	15:85223943-85224063	136	16	-12.2994	1.62448e-12
RP5-890O3.9_CPSF3L	1:1255835-1256062	135	16	-12.3015	7.42595e-12
SNORD84_ATP6V1G2-DDX39B_DDX39B	6:31508178-31508311	136	16	-12.3062	0.000122333
PTBP1	19:806556-807902	136	16	-12.309	0.00030496
EIF3B	7:2419913-2420049	136	16	-12.3102	0
TMEM161A	19:19243465-19243563	135	16	-12.3171	1.73639e-05
CHD1	5:98204717-98204981	120	16	-12.3316	5.27356e-13
GSTM4	1:110199971-110200211	133	15	-12.34	0
DXO_STK19	6:31940397-31940534	134	16	-12.3448	3.5541e-05
NUDT22_DNAJC4_RP11-783K16.14	11:63998503-63998619	136	16	-12.345	1.62437e-12
PKP4_AC005042.4	2:159535092-159535166	136	16	-12.3492	1.62448e-12
NFIC	19:3453760-3453914	136	16	-12.3547	4.3834e-05
SEC16A	9:139340096-139340171	136	16	-12.3621	1.28875e-12
RRBP1	20:17660643-17660720	132	16	-12.3623	2.8268e-07
MYL6_MYL6B_RP11-603J24.14	12:56553406-56553514	136	16	-12.374	0
MYL6_MYL6B_RP11-603J24.14	12:56553370-56553514	136	16	-12.4122	0
RP11-98D18.15_MRPL9	1:151733926-151734028	136	16	-12.4168	1.7195e-06
TIMM17A	1:201932743-201932872	136	16	-12.4192	0
TM7SF3	12:27152458-27152609	130	16	-12.424	7.3176e-09
C9orf3	9:97844856-97845001	136	16	-12.4279	0.0024366
NTMT1	9:132394928-132395080	136	16	-12.4391	1.62448e-12
GPS1_RFNG	17:80010131-80010335	135	16	-12.4418	1.62437e-12
STOML1	15:74276999-74277209	125	16	-12.4516	1.884e-08
SNORA48_EIF4A1_SNORA67_SENP3-EIF4A1	17:7477839-7477996	136	16	-12.4528	4.4086e-09
MAN2C1	15:75654982-75655089	136	16	-12.4576	7.01772e-13
SH3GLB2	9:131783369-131783498	133	16	-12.4603	5.6462e-05
HNRNPUL1_TGFB1	19:41811736-41811772	136	16	-12.4651	1.64757e-13
NADSYN1	11:71187078-71188484	136	16	-12.4969	2.0459e-05
DPH7	9:140470760-140470854	132	16	-12.4992	1.2202e-06
DNAJC4_RP11-783K16.14	11:64000172-64000337	136	16	-12.5007	2.66454e-15
EIF3B	7:2419913-2419918	136	16	-12.5049	1.11022e-16
SNORA48_EIF4A1_SNORA67_SENP3-EIF4A1	17:7477865-7477996	136	16	-12.5102	4.4085e-09
AC002985.3_DDX49	19:19032471-19032651	135	16	-12.5147	0.00077908
SMG7	1:183516237-183516387	129	16	-12.5256	3.30846e-14
TXNRD2	22:19864562-19864735	136	16	-12.526	2.14273e-14
CLK4	5:178044344-178044435	136	16	-12.5337	4.9598e-06
PRMT1	19:50183128-50183186	136	16	-12.5522	1.62448e-12
OSBPL9	1:52221991-52222030	133	16	-12.5758	2.3348e-12
CD47	3:107770785-107770817	136	15	-12.5852	5.4608e-10
RP11-640M9.2	1:144617149-144617252	130	15	-12.6062	0.00084432
PDCD10	3:167443188-167443261	123	16	-12.6073	0
ZNF384_RP4-761J14.8	12:6781515-6781698	136	16	-12.6116	9.1588e-07
CTD-2555A7.3_ACSF3	16:89180746-89180895	134	16	-12.6217	0.0077392
IRF3	19:50163969-50164085	136	16	-12.6233	7.03693e-12
ASL	7:65551730-65551808	136	16	-12.6312	1.6892e-06
ARL16	17:79649063-79649179	136	16	-12.6456	7.3786e-11
INO80B	2:74684460-74684987	136	16	-12.6464	6.9632e-07
INO80B	2:74684460-74684665	136	16	-12.647	7.1725e-07
MAPK3_GDPD3	16:30126915-30126966	136	16	-12.6505	0
HNRNPC	14:21730759-21730927	136	16	-12.6507	1.62437e-12
WBSCR22	7:73108321-73108380	125	16	-12.6648	3.07731e-11
SCPEP1	17:55075734-55075859	133	16	-12.6653	5.548e-11
FLOT2	17:27210125-27210249	134	16	-12.6742	0
PASK_PPP1R7	2:242092897-242093019	135	16	-12.6758	2.22045e-16
U8_AKR1C1	10:5008201-5008273	136	14	-12.6826	1.63303e-12
ARIH2	3:48964894-48965246	123	16	-12.6947	8.6849e-10
TSG101	11:18541065-18541150	127	16	-12.7071	1.62481e-12
BLOC1S2	10:102045853-102046089	134	16	-12.7121	1.5437e-11
PRMT2	21:48081711-48081848	127	16	-12.7221	0.00030459
DTNB	2:25606704-25606758	126	15	-12.7262	0.00038237
AC099850.1_SKA2	17:57196679-57196856	130	16	-12.7346	1.11022e-16
SEPT2	2:242265381-242265528	135	16	-12.7387	1.64224e-12
PSMC5_FTSJ3	17:61905033-61905283	136	16	-12.7424	0
ULK3	15:75134875-75135015	130	16	-12.748	2.7986e-06
WBP1_INO80B	2:74686604-74686689	136	16	-12.7522	0
TMEM106C	12:48360465-48360515	127	16	-12.7616	1.64813e-12
CPSF7	11:61187941-61188045	136	16	-12.7631	1.37657e-12
HYI_SZT2	1:43918573-43918675	136	13	-12.7678	8.7386e-07
CMC2	16:81015410-81015482	136	16	-12.772	1.76748e-13
TAPBP	6:33280993-33281254	135	16	-12.7724	1.62448e-12
IST1_RP11-498D10.5	16:71958671-71958720	136	16	-12.7862	1.62448e-12
ARFGAP1	20:61917723-61917794	136	16	-12.7978	1.62448e-12
ERCC1_CD3EAP	19:45916934-45917003	136	16	-12.8183	0
PIN4	X:71406310-71406384	136	16	-12.8226	4.644e-07
SNURF_SNURF_SNRPN	15:25213078-25213229	136	13	-12.8304	1.65878e-12
ECI2	6:4133935-4133945	136	16	-12.8327	2.4528e-06
APP	21:27369674-27369731	136	16	-12.8545	6.4791e-07
MAPKAP1	9:128432096-128432186	132	16	-12.8618	6.48182e-12
C17orf62	17:80405455-80405497	134	16	-12.8755	1.2211e-06
WDR59	16:74933595-74933652	136	16	-12.8778	0
TEX261_AC007040.11	2:71218959-71219113	132	16	-12.8788	9.7996e-08
DAZAP2	12:51634750-51634900	136	16	-12.8851	0
PRMT1	19:50183396-50183495	136	16	-12.8912	0
ARHGEF40	14:21555264-21555622	135	16	-12.901	3.1067e-10
DAZAP2	12:51634779-51634900	136	16	-12.9113	0
DAZAP2	12:51634682-51634900	136	16	-12.9121	0
DPH7	9:140459344-140459536	136	16	-12.9169	1.9222e-06
PRKCSH	19:11558507-11558537	136	16	-12.9441	5.5077e-09
LAMTOR3	4:100815111-100815157	121	16	-12.9463	0.000103625
ILK_RRP8_RP11-732A19.8	11:6629275-6629441	136	16	-12.9469	1.62459e-12
JOSD2	19:51010830-51010956	136	16	-12.9715	3.8433e-06
CDIPT	16:29873906-29873956	136	16	-12.9749	1.62492e-12
WDR77_RP11-552M11.4	1:111984120-111984226	136	16	-12.9759	0
RP1-309K20.6_CPNE1	20:34246851-34246936	125	16	-12.9889	2.1624e-05
ZNF76	6:35261527-35261692	136	16	-13.01	5.9433e-09
VPS41	7:38767940-38768034	134	16	-13.0137	1.62448e-12
PCYT2	17:79867037-79867197	136	16	-13.018	1.62448e-12
GIPC1	19:14593500-14593818	131	16	-13.0333	0.0083361
PTBP1	19:805012-805187	136	16	-13.0378	2.33147e-15
CASC4	15:44695084-44695252	123	16	-13.0382	4.0984e-05
RP11-886H22.1_ACAA2	18:47339838-47340186	136	16	-13.0571	0.00021914
AC007292.3_MPND	19:4357947-4358169	135	16	-13.0584	3.4243e-06
CHCHD7	8:57128947-57128991	136	16	-13.0614	6.62803e-13
STAU1	20:47790731-47790806	125	16	-13.0799	1.65201e-12
C9orf89	9:95874160-95874220	136	16	-13.083	0.0043553
NDEL1	17:8347244-8347675	130	16	-13.1026	2.2809e-09
BRD2	6:32942797-32942889	136	16	-13.1263	6.52256e-13
STRA13	17:79977385-79977570	136	16	-13.1355	2.94931e-12
NBN_DECR1	8:91029351-91029554	136	16	-13.1413	0
AD000671.6_IGFLR1_KMT2B	19:36230610-36230987	136	16	-13.1652	6.39488e-14
FGFR3	4:1806056-1806247	122	13	-13.1813	0.0079991
SSH3	11:67072247-67072478	123	16	-13.1885	3.2366e-10
RP4-539M6.19_MTFP1	22:30823108-30823390	135	16	-13.2098	1.63636e-12
RBM10	X:47039278-47039436	120	16	-13.2145	4.7408e-08
HERC4	10:69718869-69718893	120	16	-13.2247	1.62526e-12
YDJC	22:21983696-21984050	133	16	-13.2308	2.5332e-06
ACP2_NR1H3	11:47281341-47281530	122	16	-13.2314	2.0857e-05
UBE2B	5:133724042-133724104	136	16	-13.2488	6.66134e-16
NBN_DECR1	8:91029430-91029554	136	16	-13.25	0
SFXN4	10:120924713-120925048	126	16	-13.2516	8.4255e-05
CASP9	1:15833393-15833628	122	16	-13.2519	6.0228e-05
PDLIM2_AC037459.4	8:22449063-22449181	135	16	-13.2537	3.9028e-05
IDI2-AS1_IDI1	10:1089938-1090111	136	16	-13.2551	2.3162e-06
SPPL2A	15:51018269-51018517	136	16	-13.2657	1.67873e-05
TPM1	15:63335667-63336030	136	16	-13.2785	0
RBM4_RBM14_RBM14-RBM4	11:66410920-66411611	136	16	-13.2913	3.1314e-09
TMEM126B_DLG2	11:85342730-85342852	136	16	-13.304	9.9937e-09
ZMAT5	22:30162860-30162937	132	16	-13.3134	4.3042e-05
HNRNPH3	10:70098259-70098444	136	16	-13.323	1.5897e-06
SRSF4	1:29495014-29495150	136	16	-13.3354	4.44089e-16
KHNYN_SDR39U1	14:24910879-24911383	136	16	-13.3361	1.6323e-06
FAM214A_RP11-23N2.4	15:52879252-52879347	134	14	-13.3612	1.88494e-12
CNIH2_YIF1A	11:66052851-66053007	136	16	-13.3719	3.626e-06
AC007292.3_MPND	19:4358079-4358169	135	16	-13.3784	0.00010175
BAG6_APOM	6:31620200-31620289	133	16	-13.3818	2.2953e-06
NT5DC1	6:116558621-116558802	136	16	-13.388	0
MIF4GD	17:73263826-73264273	125	16	-13.3881	4.9884e-06
ATP6V0E1	5:172447240-172447370	136	16	-13.3906	0
TMEM39A	3:119154601-119154782	130	16	-13.398	0
ACADM_RP4-682C21.5	1:76194073-76194173	136	16	-13.4053	7.1744e-07
MTO1	6:74191751-74191762	135	16	-13.4191	0
DHRS4_DHRS4-AS1	14:24434970-24435041	136	16	-13.4233	2.44e-10
COMT	22:19949755-19950338	136	16	-13.446	2.69074e-12
CTB-179K24.3_MARK4_GEMIN7	19:45583164-45583287	121	16	-13.4544	7.5857e-07
TRMT11	6:126329802-126329891	136	16	-13.4582	1.62448e-12
PCBP2_RP11-793H13.8	12:53859715-53859757	136	16	-13.4683	0
BMP1	8:22053693-22054192	136	16	-13.4816	2.9007e-11
TOM1L1	17:52982849-52982928	126	16	-13.4902	5.9556e-11
NBN_DECR1	8:91029351-91029554	136	16	-13.4995	0
YIPF1	1:54320673-54320724	136	16	-13.5019	0.002981
NBN_DECR1	8:91029351-91029554	136	16	-13.5064	0
C19orf66	19:10199982-10200054	136	15	-13.5368	1.62459e-12
MAP2K2	19:4097276-4097341	136	16	-13.5427	0
AC135048.1_HSD3B7_SETD1A	16:30997369-30997525	135	14	-13.5506	1.62581e-12
PRR5-ARHGAP8_ARHGAP8_PRR5	22:45130906-45131042	136	13	-13.5507	3.6665e-05
NBN_DECR1	8:91029529-91029554	136	16	-13.5521	0
DHRS4_DHRS4-AS1	14:24435140-24435192	136	16	-13.5796	2.1317e-10
AKR1A1	1:46034156-46034356	136	16	-13.5866	2.6811e-06
HMOX2_NMRAL1	16:4555484-4555611	136	16	-13.5979	0
CCT7	2:73467564-73467671	123	16	-13.6054	1.8693e-10
ATXN2	12:111891480-111891649	135	16	-13.6066	1.1607e-09
AP000347.2_KB-1572G7.2_GUSBP11	22:24025911-24026054	132	14	-13.6072	0.0164379
TPD52	8:80976712-80976828	127	16	-13.6096	1.79279e-12
RPS15	19:1438809-1438891	136	16	-13.6112	0
C17orf62	17:80405455-80405497	134	16	-13.641	3.08e-07
TMEM14C	6:10726139-10726241	136	16	-13.6464	1.62881e-12
RP1-309K20.6_CPNE1	20:34246851-34246904	124	16	-13.6465	6.4701e-05
PABPC4_RP11-69E11.8	1:40036768-40036905	135	16	-13.6467	1.62448e-12
RABEPK	9:127982817-127982979	136	16	-13.6469	8.65974e-15
FLNB	3:58127584-58127656	127	16	-13.6486	0.030021
SRSF10	1:24298113-24298116	133	16	-13.6727	1.744e-11
SYNRG	17:35880281-35880317	130	16	-13.7279	0.00080483
HMOX2_NMRAL1	16:4555484-4555611	136	16	-13.7327	0
MAPKAP1	9:128432096-128432186	132	16	-13.7355	1.97253e-12
AFMID	17:76198579-76198684	136	16	-13.7374	0
SLC39A14	8:22265822-22266009	135	16	-13.7468	5.9993e-09
PGAP2	11:3845112-3845365	130	16	-13.7481	0.00023652
PEX5	12:7354836-7354947	127	16	-13.7574	7.1847e-07
PCSK7	11:117078369-117078451	128	16	-13.7696	4.1093e-07
ERI3	1:44804716-44804994	135	16	-13.7747	1.62692e-12
UBE2B	5:133724015-133724104	136	16	-13.7956	3.33067e-16
MAN2C1	15:75654982-75655089	136	16	-13.7963	4.0551e-09
NBN_DECR1	8:91029351-91029554	136	16	-13.8107	0
RP11-155D18.12_RP11-155D18.14_ABHD14B	3:52005475-52005714	136	16	-13.8298	1.11022e-16
STRA13	17:79977168-79977257	136	16	-13.83	1.62448e-12
CHKA_RP11-802E16.3	11:67828959-67829297	136	16	-13.8406	1.62448e-12
C17orf62	17:80405455-80405497	134	16	-13.8429	2.3666e-07
STARD3	17:37814961-37815073	136	16	-13.8544	1.62625e-12
TEX264	3:51708286-51708578	135	16	-13.8666	1.62492e-12
SSR4_IDH3G	X:153061117-153062987	136	16	-13.8723	0
TEX264	3:51708286-51708578	135	16	-13.8781	1.68099e-12
DCAF6	1:167988782-167988905	133	16	-13.891	1.11022e-16
AF196779.12_WDR45	X:48935301-48935406	136	16	-13.8929	4.3308e-07
LGALS1	22:38072862-38073072	136	16	-13.8937	0
EIF2B5_PSMD2	3:184019645-184019859	125	16	-13.898	0
PRMT1	19:50183128-50183182	136	16	-13.9046	5.66214e-15
POLR2F	22:38355352-38355483	136	16	-13.9097	0
LEPRE1	1:43225061-43225064	135	16	-13.9123	0
GLYCTK-AS1_GLYCTK	3:52325760-52325938	136	16	-13.9203	2.59792e-14
AP2S1	19:47342721-47342877	136	16	-13.9763	1.62448e-12
SLC9B2	4:103949903-103950040	134	14	-13.9918	0.000164515
KTN1	14:56133958-56134048	136	16	-14.0184	0
RNF220_TMEM53	1:45120611-45120881	128	15	-14.0232	1.52e-06
SDS_SDSL	12:113866224-113866264	135	16	-14.0783	4.412e-11
CCM2	7:45077851-45078025	136	16	-14.0946	2.253e-11
CARS	11:3023199-3023404	136	16	-14.1081	0
IFFO1	12:6658641-6658650	126	15	-14.1128	0.0059954
DPH7	9:140470760-140470854	132	16	-14.1138	5.1687e-08
RP4-539M6.19_MTFP1	22:30823226-30823390	135	16	-14.1239	1.82399e-12
TMEM175_GAK	4:941496-941680	134	16	-14.1358	0.0012375
APTX	9:32988080-32988127	134	16	-14.1372	1.981e-09
FDPS	1:155279833-155279996	136	16	-14.1376	4.44089e-16
NACA	12:57118235-57118333	136	16	-14.1458	4.6024e-10
ADAM15	1:155034379-155034451	136	16	-14.1478	4.74065e-13
INO80E	16:30012532-30012851	136	16	-14.152	1.62448e-12
CPSF7	11:61187941-61188045	136	16	-14.1578	3.75233e-12
PCGF3	4:726188-726287	134	16	-14.161	3.7024e-05
ECSIT	19:11629889-11630008	135	16	-14.1795	2.75635e-12
PCSK7	11:117077782-117077876	134	16	-14.1869	1.1453e-06
BID	22:18226568-18226779	135	16	-14.2263	2.01672e-12
DCAF6	1:167992225-167992285	136	16	-14.2456	3.77476e-15
EIF2B5_PSMD2	3:184019581-184019859	125	16	-14.2538	0
SDHAF2_RP11-286N22.8_CPSF7	11:61205096-61205320	136	16	-14.2545	0
ARFGAP2	11:47193831-47193884	136	16	-14.2575	0
CENPV_PIGL	17:16251999-16252647	136	16	-14.2618	1.50625e-05
MPP1	X:154018228-154018297	121	15	-14.2653	4.3238e-10
PEMT	17:17415822-17415968	136	16	-14.2686	0
CLK1	2:201724847-201724938	136	16	-14.2782	0.00011505
HSF4_NOL3	16:67207764-67207949	134	16	-14.2913	0.0162843
PDCD4_BBIP1	10:112661295-112661370	126	16	-14.3015	1.35669e-13
ZNF655_GS1-259H13.10	7:99159510-99159596	128	15	-14.3075	2.2001e-10
C19orf66	19:10199786-10200054	136	15	-14.3183	1.62459e-12
KHNYN_SDR39U1	14:24910879-24911001	136	16	-14.3186	1.9598e-09
SPTAN1	9:131371929-131371944	134	16	-14.3584	4.07185e-12
RNF167_SLC25A11	17:4844167-4844288	136	16	-14.3598	0
C18orf32_RP11-110H1.4_RPL17-C18orf32	18:47013412-47013576	136	16	-14.3601	5.0802e-09
LINC00963	9:132255694-132255874	136	16	-14.3661	0
IL17RC	3:9965665-9965821	136	16	-14.3977	1.62448e-12
AC115618.1_RBM3	X:48433948-48434055	134	16	-14.4016	1.62437e-12
CDC42SE1	1:151029126-151029262	133	16	-14.4018	0
PGAP2	11:3845112-3845365	130	16	-14.4165	0.000158101
HSF4_NOL3	16:67207910-67207949	134	16	-14.4221	0.0157004
BAG6	6:31607276-31607423	136	16	-14.4418	7.6602e-09
ARHGEF1	19:42402094-42402262	132	16	-14.4528	1.62437e-12
PCYT2	17:79866751-79866913	136	16	-14.4533	0
AKT2	19:40771128-40771258	136	16	-14.4556	1.3799e-08
MRPL47_NDUFB5	3:179333772-179333837	136	16	-14.4881	1.62448e-12
SSR2	1:155984751-155984864	136	16	-14.5034	0
ATP5SL	19:41939176-41939339	135	16	-14.5059	0.043258
MRPL47_NDUFB5	3:179333770-179333837	136	16	-14.5288	0
DPH7	9:140459344-140459410	135	16	-14.5528	1.2913e-06
EIF2B5_PSMD2	3:184019558-184019859	125	16	-14.5662	0
MRPL47_NDUFB5	3:179333770-179333837	136	16	-14.5882	1.62437e-12
MORF4L2	X:102933548-102933579	136	16	-14.5885	1.1655e-07
SMUG1	12:54581602-54581689	129	16	-14.5894	3.6569e-07
GPS1_RFNG	17:80010134-80010335	135	16	-14.5894	0
SZRD1	1:16719722-16719977	136	16	-14.5956	1.62492e-12
USF2	19:35760705-35760906	136	16	-14.6074	6.4626e-05
CNDP2	18:72164743-72164961	133	16	-14.6117	1.75726e-12
LETMD1	12:51449932-51450028	136	16	-14.6136	1.4015e-09
CCT7	2:73470131-73470257	136	16	-14.6268	0
FAM193B	5:176958282-176958522	136	16	-14.6336	6.3619e-08
GPS1_RFNG	17:80010253-80010335	135	16	-14.6472	0
ERCC1	19:45917220-45917292	136	16	-14.6522	1.3247e-06
ZNF655_GS1-259H13.10	7:99159510-99159990	124	15	-14.6605	7.1672e-08
BIN1	2:127808729-127808819	136	15	-14.6711	1.64002e-12
UBE2V2	8:48955592-48955741	135	16	-14.677	1.61726e-12
MTMR14	3:9739394-9739550	136	16	-14.6903	1.63614e-12
PTPN3	9:112184997-112185132	120	15	-14.6944	3.5594e-06
NKIRAS2_DNAJC7	17:40174393-40174658	134	16	-14.6971	1.62448e-12
PDCD4_BBIP1	10:112661295-112661370	126	16	-14.7192	3.1804e-11
DHODH	16:72057378-72057532	136	16	-14.7193	3.26406e-14
NUMB	14:73749066-73749213	136	16	-14.7272	1.3319e-10
DHODH	16:72057378-72057532	136	16	-14.7449	3.03091e-14
RPL13_SNORD68	16:89627361-89627471	136	16	-14.7493	2.3182e-11
ODF2	9:131258420-131258576	130	16	-14.7539	1.62492e-12
GRB14	2:165364964-165365113	134	13	-14.7564	7.03e-09
CMC2	16:81015410-81015482	136	16	-14.7696	1.62448e-12
TPPP2_AL161668.5_NDRG2	14:21492188-21492298	136	15	-14.7806	1.63569e-12
RP11-264B17.4_SPNS1_RP11-264B17.3	16:28993676-28993866	136	16	-14.7812	1.31672e-13
MFSD11_RP11-318A15.7_SRSF2	17:74731853-74731957	136	16	-14.8079	0
MAPKAP1	9:128434594-128434922	130	16	-14.813	2.40064e-12
SHMT2	12:57625290-57625343	136	16	-14.8308	1.62448e-12
RPAIN	17:5329290-5329619	131	16	-14.8506	1.2806e-07
MIR3656_RPS25_TRAPPC4	11:118890859-118890963	136	16	-14.8595	7.27196e-14
NDUFA12	12:95387945-95388033	136	16	-14.8609	0
TNIP1	5:150411847-150411944	136	16	-14.8646	0
MRPL30_MRPL30_MITD1_C2orf15	2:99804639-99804720	126	16	-14.8687	1.62437e-12
UBE2J2	1:1203241-1203372	135	16	-14.8693	5.93436e-12
AGPAT1_PPT2-EGFL8	6:32144286-32145010	135	16	-14.8763	0.000155628
ARFGAP2	11:47193831-47193884	136	16	-14.8794	0
STX16-NPEPL1_NPEPL1	20:57280553-57280625	136	16	-14.8912	1.67699e-12
PQLC1	18:77679183-77679400	136	16	-14.9038	8.0923e-09
LINC00963	9:132255694-132255874	136	16	-14.9038	0
ELOVL1	1:43830598-43830679	136	16	-14.915	1.62448e-12
RP11-968A15.8_COPZ1	12:54734246-54734399	136	16	-14.9199	0
AC068533.7_RP5-1132H15.1_CRCP	7:65595730-65595829	128	16	-14.9399	1.62448e-12
IL17RC	3:9970263-9970314	136	16	-14.9414	2.8812e-06
COA1	7:43690210-43690311	127	16	-14.9648	1.9312e-09
AC068533.7_ASL	7:65554162-65554322	136	16	-14.9778	7.1018e-08
UPF3A	13:115051776-115051875	127	16	-14.9892	7.776e-07
AP000304.12_CRYZL1	21:34971554-34971591	127	16	-14.9969	0
PFDN5	12:53691633-53691708	136	16	-15.0051	0
PARP12	7:139727075-139727206	135	16	-15.0084	0.00702
MSTO2P_MSTO1_DAP3	1:155706736-155706854	136	16	-15.0123	0
RP1-309K20.6_CPNE1	20:34243123-34243266	125	16	-15.0253	0
SZRD1	1:16719725-16719977	136	16	-15.0281	1.62448e-12
TCF3	19:1612205-1612432	130	16	-15.0459	4.5267e-07
ZBTB8OS	1:33099245-33099328	135	16	-15.0914	9.17419e-11
PCGF3	4:726232-726287	134	16	-15.092	2.4744e-08
MARK4_TRAPPC6A	19:45668384-45668452	134	16	-15.0964	3.9565e-07
PSMA4	15:78834824-78834987	136	16	-15.097	5.88418e-15
BCL7B	7:72954211-72954382	136	16	-15.1277	1.62947e-12
LETMD1	12:51449926-51450028	136	16	-15.1473	4.5368e-10
MIR3656_RPS25_TRAPPC4	11:118890914-118890963	136	16	-15.149	1.64224e-12
IL17RC	3:9972083-9972143	123	16	-15.1556	1.62448e-12
EMP3	19:48830086-48830179	131	16	-15.1648	2.5527e-11
ATP5C1_KIN	10:7839009-7839141	133	16	-15.1872	8.0016e-09
BCL2L1_AL160175.1	20:30310133-30310151	136	16	-15.188	7.2917e-09
NUDT9	4:88370293-88370405	134	16	-15.1961	1.62448e-12
SUN2	22:39150646-39150711	128	16	-15.2221	2.6781e-10
SDHAF2_RP11-286N22.8_CPSF7	11:61205475-61205585	136	16	-15.2359	0
STK25	2:242447420-242447550	135	16	-15.2459	2.4273e-09
RAP1GAP	1:21929406-21930405	133	13	-15.2519	1.62437e-12
ALKBH6_AC002116.8	19:36504415-36505076	124	16	-15.2668	1.4495e-09
NDUFAF5	20:13795063-13795161	135	16	-15.2745	1.7101e-07
E2F4	16:67227324-67227418	136	16	-15.2766	1.62448e-12
CDK5RAP1	20:31967266-31967497	127	16	-15.2944	1.68465e-12
IL17RC	3:9965704-9965821	136	16	-15.2979	0
HSCB_CHEK2	22:29141851-29141996	135	16	-15.3006	5.2879e-09
MIR3656_RPS25_TRAPPC4	11:118890859-118890963	136	16	-15.3068	3.64153e-14
MFF	2:228217229-228217289	135	16	-15.3097	0.0024642
OS9_RP11-571M6.7	12:58112965-58114046	136	16	-15.3172	1.7418e-08
SDHAF2_RP11-286N22.8_CPSF7	11:61205475-61205585	136	16	-15.3204	1.62448e-12
INO80E	16:30015888-30015978	136	16	-15.3289	1.62625e-12
DUS3L_CTB-54O9.9	19:5786759-5786930	136	16	-15.3332	5.34017e-14
TST_MPST	22:37419792-37419968	125	16	-15.3388	1.81632e-12
ATP6V0D1	16:67478430-67478609	136	16	-15.3409	1.62448e-12
OCIAD1	4:48835417-48835498	136	16	-15.3421	1.62448e-12
TCEB1	8:74871999-74872053	135	16	-15.3603	1.6936e-10
LETMD1	12:51450132-51450285	135	16	-15.3664	9.75109e-13
LGMN	14:93170984-93171052	136	16	-15.3738	1.62947e-12
HDDC2_TPD52L1	6:125578243-125578304	135	13	-15.3779	1.7131e-07
ATP6V0D1	16:67478430-67478609	136	16	-15.4118	0
MMS19	10:99221252-99221584	136	16	-15.4157	0.000102179
CTD-2651B20.1_SHF	15:45464080-45464276	135	14	-15.4205	1.62625e-12
TARBP1	1:234536598-234536694	123	16	-15.421	1.5552e-10
TCF20	22:42564614-42564709	128	16	-15.4356	6.1099e-08
ZSWIM7	17:15880892-15881014	121	16	-15.4466	3.833e-05
ATP6V0D1	16:67478430-67478609	136	16	-15.4481	1.62448e-12
BECN1_CNTD1	17:40965965-40966026	130	16	-15.469	1.6956e-09
CRAMP1L_HN1L_LA16c-431H6.6	16:1735439-1735588	130	16	-15.4922	3.33067e-16
HARS	5:140062684-140062804	126	16	-15.5145	0
LETMD1	12:51449926-51450028	136	16	-15.5254	9.9637e-10
OCIAD1	4:48835417-48835498	136	16	-15.5324	0
ELOVL1	1:43830598-43830856	136	16	-15.5385	0.00083977
DCAF6	1:168007608-168007726	136	16	-15.5576	5.74418e-12
HDLBP_SEPT2	2:242265407-242265528	133	16	-15.5697	1.63281e-12
TMEM106C	12:48359871-48359955	134	16	-15.5816	0
ITSN2	2:24429112-24429144	127	16	-15.6083	1.62625e-12
HDLBP_SEPT2	2:242265407-242265528	133	16	-15.6355	1.63447e-12
C17orf62	17:80404498-80404572	134	16	-15.6491	8.88178e-15
INF2	14:105181620-105181677	136	16	-15.6584	0.00106381
TMEM220_ADPRM	17:10608844-10608932	125	14	-15.6592	0.00043591
TMEM161A	19:19243938-19244019	133	16	-15.6764	1.62448e-12
CAMK1_OGG1	3:9807442-9807574	135	15	-15.6805	1.65024e-12
UAP1	1:162562524-162562572	136	16	-15.6963	0.000137742
SUN1	7:889559-889670	126	16	-15.7162	6.88338e-13
CTNNB1	3:41281150-41281312	136	16	-15.7682	2.95775e-12
TRA2A	7:23561972-23562051	132	16	-15.7988	0
CCDC84_RPS25	11:118888071-118888667	136	16	-15.831	0.0124773
CTNNB1	3:41281150-41281309	136	16	-15.8314	1.91436e-12
TOR2A_TTC16	9:130494842-130494970	133	16	-15.8629	2.7131e-07
CCDC50	3:191092850-191093378	136	16	-15.8678	0
C14orf37_RP11-349A22.5	14:58740728-58740853	134	16	-15.8696	1.2715e-07
TPD52L2	20:62507168-62507228	136	16	-15.89	1.59062e-12
HRAS	11:532630-532755	121	16	-15.9086	1.56298e-05
COX4I1_EMC8	16:85834789-85834884	136	16	-15.9088	5.1576e-10
EXOC7	17:74086409-74086478	127	16	-15.9204	1.8399e-06
ATPAF2	17:17924436-17924552	122	16	-15.9225	5.1279e-10
PSMA4	15:78834917-78834987	136	16	-15.923	0
TMEM184A	7:1589182-1589240	126	15	-15.944	1.63869e-12
HMOX2_NMRAL1	16:4555484-4555611	136	16	-15.9735	0
TSPAN17	5:176079914-176082021	128	16	-15.9838	2.44e-06
REXO2_RP11-212D19.4	11:114315307-114315374	136	16	-15.9933	0
ACTL6A	3:179293190-179293292	123	16	-16.0024	1.62437e-12
FAM192A	16:57208080-57208198	135	16	-16.0365	7.09433e-14
PTBP1	19:805012-805187	136	16	-16.0515	1.10456e-12
TMX2-CTNND1_CTNND1_RP11-691N7.6	11:57561481-57561553	121	16	-16.0872	9.6163e-10
TNIP1	5:150411847-150411944	136	16	-16.0889	1.62448e-12
KIFC3	16:57819375-57819578	131	16	-16.1154	3.555e-09
ARPC2	2:219082094-219082267	135	16	-16.1254	1.62437e-12
POP5	12:121017316-121017400	136	16	-16.1295	1.62448e-12
ABHD11	7:73152205-73152402	124	16	-16.1453	0
KHNYN_SDR39U1	14:24910879-24911001	136	16	-16.1468	3.09091e-11
EDEM2	20:33719444-33719586	136	16	-16.1514	1.62448e-12
MRPL22	5:154330380-154330498	136	16	-16.1543	5.7164e-08
ANKRD10	13:111545374-111545610	136	16	-16.1576	2.7184e-06
NUP85	17:73225092-73225226	136	16	-16.1628	0
SF3B1	2:198283619-198283675	121	16	-16.1736	1.62448e-12
LRRC37A5P_DNAJC25_DNAJC25-GNG10	9:114405136-114405374	136	16	-16.1985	1.9799e-05
AD000671.6_IGFLR1_KMT2B	19:36230610-36230670	136	16	-16.2112	3.2924e-07
PHYKPL	5:177658669-177658867	130	15	-16.2298	0
SEPT2	2:242265407-242265528	135	16	-16.2306	1.10301e-12
APP	21:27369674-27369731	136	16	-16.2426	0
MOCS1	6:39876815-39876878	136	15	-16.2697	0.00036115
RBM6	3:50004630-50006181	136	16	-16.3009	1.84208e-12
GPS1_RFNG	17:80010250-80010335	135	16	-16.3222	0
IDNK	9:86243095-86243126	125	13	-16.3254	0.00033692
PRMT2	21:48056350-48056459	125	16	-16.3278	0.000140567
MANBAL	20:35927165-35927282	130	16	-16.3352	1.7008e-06
CXXC1	18:47813792-47813878	136	16	-16.349	0
BCL7B	7:72954211-72954382	136	16	-16.3762	1.62448e-12
PPP1R35_RP11-758P17.2_RP11-758P17.3	7:100033253-100033390	136	16	-16.3791	3.2457e-07
RP11-426L16.10_RHOC	1:113247721-113247745	136	16	-16.3913	0
GAK	4:898424-898567	120	16	-16.4028	1.62437e-12
KANK1	9:732377-734747	136	15	-16.4123	1.77726e-05
AFMID	17:76202026-76202131	136	16	-16.4226	0
RP11-216L13.17_TMEM141	9:139686162-139686229	136	16	-16.4411	4.8004e-07
ATAT1_C6orf136	6:30615382-30615623	129	16	-16.4475	4.4706e-08
PGS1	17:76411032-76411108	132	16	-16.4937	3.40394e-13
SRRM2-AS1_SRRM2	16:2806334-2806607	131	16	-16.5057	4.1134e-08
ILF3	19:10798021-10798384	136	16	-16.5214	4.84612e-13
TPRA1	3:127294591-127294652	136	16	-16.5262	0.00068107
DCAF8_DCAF8	1:160231074-160231148	122	16	-16.5301	7.1732e-11
C19orf66	19:10199786-10199884	136	15	-16.5337	1.62448e-12
RP11-426L16.10_RHOC	1:113247721-113248874	136	16	-16.5401	0
OCEL1	19:17338648-17338814	136	16	-16.5409	1.5254e-05
TPM2	9:35685060-35685136	136	16	-16.5601	0.000183202
TRAPPC10	21:45516485-45516594	130	16	-16.579	0
SORBS2	4:186599632-186599701	123	13	-16.5821	5.5249e-07
RP11-426L16.10_RHOC	1:113247721-113247790	136	16	-16.5977	1.11022e-16
PLSCR1	3:146254326-146254352	131	16	-16.6312	1.5494e-08
WBP1_INO80B	2:74686604-74686689	136	13	-16.6326	5.7742e-07
ARFIP2	11:6499808-6499882	136	16	-16.6717	0
FDPS	1:155279543-155279756	133	16	-16.681	6.8699e-11
CD47	3:107769424-107769449	136	15	-16.7066	4.81593e-12
PHC2_MIR3605	1:33799785-33799893	136	16	-16.7133	2.6854e-11
MSTO2P_MSTO1_DAP3	1:155706796-155706854	136	16	-16.7134	1.62448e-12
RP11-426L16.10_RHOC	1:113247721-113247823	136	16	-16.7167	0
TMEM234	1:32683037-32683178	126	16	-16.7496	3.3322e-07
NQO2	6:3015763-3015877	136	16	-16.7562	0.0025438
LRRFIP2	3:37163125-37163182	125	16	-16.7672	4.8526e-09
MSTO2P_MSTO1_DAP3	1:155706736-155706854	136	16	-16.7914	1.62448e-12
LSM14B	20:60701281-60701495	128	16	-16.8008	4.5477e-12
SCAMP3	1:155231447-155231525	136	16	-16.802	0
C1orf86_PRKCZ	1:2121151-2121220	136	16	-16.8157	2.1855e-07
RP11-680A11.5_C12orf10_PFDN5	12:53699691-53699844	136	16	-16.8291	1.62448e-12
DHRS4L2	14:24470592-24470726	128	13	-16.8505	1.78457e-12
HIBCH	2:191073605-191073639	136	16	-16.8586	1.0803e-07
OS9_RP11-571M6.7	12:58113881-58114046	136	16	-16.8685	4.1804e-10
PGAP2	11:3845112-3845365	130	16	-16.8788	5.44009e-15
INSIG1	7:155094456-155094556	136	14	-16.881	1.22125e-15
VEGFA	6:43749692-43749824	136	16	-16.8885	0
SCARNA12_PHB2_EMG1	12:7076333-7076401	136	16	-16.9085	0
PRMT5-AS1_PRMT5	14:23395341-23395505	125	16	-16.9372	1.9984e-15
APTX	9:32987541-32987729	136	16	-16.9438	1.62614e-12
EMP3	19:48830777-48830880	134	16	-16.966	1.9984e-15
RNPS1	16:2314573-2314761	135	16	-16.9702	1.62437e-12
SMPD4	2:130918758-130918845	127	16	-16.9802	2.2551e-09
PRMT2	21:48083294-48083466	131	16	-16.9879	1.62448e-12
UGP2	2:64083439-64083567	134	16	-17.0066	3.8025e-11
PRPF38B	1:109236211-109236264	131	16	-17.0105	3.3655e-11
RNPS1	16:2314573-2314761	135	16	-17.0214	0
PCBP1-AS1	2:70280862-70281126	135	16	-17.0305	0
PUF60	8:144906482-144906569	136	16	-17.0607	0
NMRK1	9:77693241-77693498	136	13	-17.0714	1.2128e-07
DCUN1D3_LYRM1_ERI2	16:20926877-20927036	124	16	-17.0756	1.6577e-06
NAB2	12:57487189-57487381	133	16	-17.0886	4.4426e-10
RP11-216L13.17_TMEM141	9:139686229-139686482	136	16	-17.0957	1.11022e-16
SARM1_SLC46A1	17:26727625-26727783	131	16	-17.0967	2.7075e-12
AP000347.2_KB-1572G7.2_GUSBP11	22:24032418-24032422	121	15	-17.1001	1.0885e-09
CEP95_AC009994.2	17:62527136-62527140	131	16	-17.1052	7.1591e-09
THYN1_VPS26B	11:134118702-134118853	136	16	-17.1157	0
ANXA7	10:75156276-75156341	134	16	-17.1573	1.14797e-13
DCAF8_DCAF8	1:160231074-160231148	120	16	-17.1592	5.9862e-11
CAMLG	5:134079676-134079742	121	16	-17.1766	6.53688e-12
COMMD4	15:75630695-75630761	136	16	-17.1824	0
SMPD4	2:130918758-130918845	127	16	-17.1838	1.4987e-09
SMC6	2:17894651-17894847	124	16	-17.196	1.62448e-12
PCBP1-AS1	2:70280862-70280947	135	16	-17.2005	0
LRRFIP2	3:37162982-37163027	125	16	-17.2095	7.469e-09
RP5-1021I20.5_RP5-1021I20.4_ZNF410	14:74388768-74388909	136	16	-17.225	3.1839e-12
LSM14B	20:60704840-60705008	133	16	-17.2298	1.62448e-12
LRRFIP2	3:37162982-37163027	125	16	-17.2303	4.8505e-09
ATP5C1_KIN	10:7839009-7839141	136	16	-17.243	0
ASCC2	22:30221610-30221769	132	16	-17.2479	1.67977e-12
ASCC2	22:30221610-30221769	132	16	-17.2551	1.67755e-12
PUF60	8:144906482-144906566	136	16	-17.2714	0
UGP2	2:64084962-64085070	134	16	-17.2809	1.8274e-11
PFDN5	12:53691633-53691708	136	16	-17.2939	0
NADK	1:1688177-1688321	136	16	-17.3044	0
RPAIN	17:5329555-5329619	134	16	-17.3265	3.1207e-07
PFDN5	12:53691633-53691708	136	16	-17.3544	0
PLSCR1	3:146254326-146254352	131	16	-17.3644	1.62437e-12
C2orf42_TIA1	2:70443884-70444017	135	16	-17.388	4.0288e-10
RP11-304L19.1_PKD1	16:2142954-2143094	129	15	-17.3917	2.0409e-05
RFXANK	19:19307994-19308329	136	16	-17.3944	1.5059e-05
PFDN5	12:53690213-53691708	136	16	-17.3944	0
CTD-2651B20.1_SHF	15:45464080-45464200	135	14	-17.407	1.4987e-10
C17orf62	17:80404498-80404568	134	16	-17.4318	0
EXOC7	17:74086409-74086562	127	16	-17.4462	9.1046e-10
RPS11	19:50000429-50000582	136	16	-17.4623	2.0613e-10
YWHAE	17:1264385-1264592	131	16	-17.4721	1.62459e-12
C17orf62	17:80404498-80404572	134	16	-17.4945	0
CNDP2	18:72164743-72164830	133	16	-17.5026	1.88738e-15
CCDC90B	11:82996915-82997142	127	16	-17.5141	4.8105e-10
SRSF5	14:70236227-70237183	136	16	-17.5267	0
TARBP2	12:53898918-53899046	136	16	-17.5368	3.2564e-08
NME4_DECR2	16:456889-456952	136	16	-17.5571	0
ANKRD10	13:111545374-111545610	134	16	-17.5581	5.3586e-11
TMEM126B_DLG2	11:85342188-85342360	136	16	-17.5615	4.42979e-14
PRMT7	16:68387297-68387394	136	16	-17.5635	3.8554e-08
STRN4	19:47230803-47230948	135	16	-17.5766	0
CRAMP1L_HN1L_LA16c-431H6.6	16:1735439-1735588	130	16	-17.5914	3.59557e-12
MYO19	17:34857691-34857801	133	16	-17.5925	1.62448e-12
PFDN5	12:53691633-53691708	136	16	-17.5951	0
SNHG11	20:37076572-37076736	135	16	-17.6236	1.62448e-12
HNRNPD	4:83280623-83280792	136	16	-17.6332	0
CPSF3L	1:1254675-1254904	135	16	-17.636	1.63847e-12
POP4	19:30101226-30101539	132	16	-17.6801	0
THBS3_RP11-263K19.4	1:155171825-155171905	120	13	-17.6846	2.7234e-09
KHNYN_SDR39U1	14:24910879-24911551	136	16	-17.703	2.9426e-09
CYTH1	17:76673076-76673132	131	16	-17.7277	1.62448e-12
BCLAF1	6:136595100-136595327	132	16	-17.7351	1.62448e-12
CRAMP1L_HN1L_LA16c-431H6.6	16:1741843-1741986	134	16	-17.7459	0
INSIG1	7:155094456-155094556	136	14	-17.7716	0
DCUN1D4	4:52753288-52753410	134	16	-17.7716	1.62437e-12
CIZ1	9:130950141-130950213	127	16	-17.779	2.0529e-11
SFXN5	2:73198698-73198814	133	16	-17.7904	0.00022458
ACTB_AC006483.1	7:5568791-5569031	134	16	-17.801	1.62448e-12
IL17RC	3:9974503-9974636	136	16	-17.8074	9.99201e-16
TMEM126B_DLG2	11:85342188-85342360	136	16	-17.8172	1.5646e-07
AKAP8	19:15479877-15480035	136	16	-17.8395	1.62448e-12
AP000304.12_ATP5O	21:35279644-35279757	136	16	-17.8547	0
ARHGEF1	19:42402094-42402262	132	16	-17.8558	0
CNDP2	18:72164743-72164830	127	16	-17.8748	0
NPRL3	16:167299-167374	126	16	-17.929	2.9254e-10
H2AFY_C5orf66	5:134686512-134686603	136	16	-17.9311	1.5966e-09
HNRNPDL	4:83346715-83346820	136	16	-17.9433	1.62437e-12
MORF4L2	X:102933426-102933528	136	16	-17.9436	0
YDJC	22:21983298-21983476	133	16	-17.9446	0.000159647
CD99L2	X:149984479-149984551	121	16	-17.9571	1.62459e-12
CLDND1	3:98239976-98240286	129	16	-17.9672	1.63181e-12
INO80E	16:30012532-30014334	136	16	-17.9676	0
TSPAN4_POLR2L	11:850287-850367	130	16	-18.0223	4.0248e-07
ETFA	15:76587931-76588078	136	16	-18.0341	3.5011e-09
STK25	2:242447420-242447550	135	16	-18.0587	4.3711e-10
RBM6	3:50009491-50009581	136	16	-18.0842	7.77156e-16
POP4	19:30101315-30101539	132	16	-18.1141	0
ENKD1	16:67697839-67697965	134	16	-18.1174	2.32037e-14
TRMU	22:46746242-46746246	136	16	-18.1254	7.4126e-11
COA1	7:43690210-43690311	127	16	-18.2004	1.1213e-09
ATAD3B	1:1425071-1425191	132	15	-18.2041	2.2887e-08
RPSA	3:39449093-39449277	136	16	-18.2065	1.8635e-08
CAMLG	5:134079676-134079742	136	16	-18.2307	0
NOSIP	19:50060346-50061202	136	16	-18.2323	1.62437e-12
SON_DONSON	21:34944856-34944936	136	16	-18.2474	1.16573e-14
INO80E	16:30012532-30012734	136	16	-18.2845	0
MIR4685_HPS1	10:100190887-100191048	134	16	-18.3465	6.4623e-05
PQLC1	18:77693968-77694022	136	16	-18.3741	6.397e-08
UGP2	2:64083439-64083567	130	16	-18.3835	5.67391e-12
ZBTB8OS	1:33099245-33099328	126	16	-18.3847	9.28913e-12
C1orf43	1:154186932-154187050	133	16	-18.3859	1.62448e-12
RPAIN_CTC-524C5.2	17:5329619-5331531	136	16	-18.4043	2.0169e-08
RP11-134L10.1_C7orf49	7:134855150-134855403	124	16	-18.4076	2.24232e-12
EIF2B5_AP2M1	3:183896644-183896910	136	16	-18.4128	1.62448e-12
MAGED2	X:54836550-54836646	135	16	-18.4337	1.62448e-12
PTK2	8:141679825-141679834	130	16	-18.4384	2.2383e-08
ACOT8_SNX21	20:44472165-44472411	136	16	-18.4467	0
KAT5	11:65480818-65480974	128	16	-18.4629	6.80245e-12
RPL18A	19:17972233-17972281	136	16	-18.4908	4.1528e-07
MGST1	12:16510538-16510633	136	14	-18.5131	0
TMEM126B_DLG2	11:85342730-85342852	136	16	-18.5138	1.62437e-12
MBD1	18:47800555-47800723	136	16	-18.535	0
SNHG8	4:119200098-119200292	136	16	-18.5379	5.3775e-10
INO80E	16:30014970-30014991	136	16	-18.5718	0
VEGFA	6:43749692-43749824	136	16	-18.5718	0
FDPS	1:155279579-155279756	133	16	-18.5743	3.8002e-10
TMBIM1_PNKD	2:219146662-219146904	134	16	-18.5813	0
TPM1	15:63353911-63353987	136	16	-18.6006	2.10942e-15
MAGED2	X:54836304-54836646	135	16	-18.6062	1.62437e-12
ATG12	5:115173324-115173461	132	16	-18.6159	1.11022e-16
SRRT	7:100478316-100478390	134	16	-18.6273	0
FIS1	7:100887287-100887420	135	16	-18.6412	4.6053e-06
H2AFV	7:44875127-44875257	136	16	-18.6595	1.62448e-12
STX16-NPEPL1_STX16	20:57244346-57244509	136	16	-18.6692	3.3295e-06
FBXO7	22:32875119-32875262	136	16	-18.6749	0
OTUB1_MACROD1	11:63782723-63782753	136	16	-18.7624	0.0006429
PLA2G4B_JMJD7-PLA2G4B	15:42135323-42135421	135	14	-18.7712	0.000183956
LSM14A	19:34717312-34717369	136	16	-18.7723	1.68476e-12
PPHLN1	12:42778741-42778798	130	16	-18.7918	7.6216e-05
WFIKKN1_C16orf13	16:684888-686093	136	16	-18.801	2.44249e-15
MAGED2	X:54836355-54836646	135	16	-18.8605	1.62437e-12
PSMB3_RNU6-866P	17:36916760-36916861	136	16	-18.8619	0
SDHD_TIMM8B_SDHD	11:111959590-111959735	136	16	-18.8645	1.62448e-12
BST2_CTD-2521M24.9_MVB12A	19:17523905-17523913	132	16	-18.8979	5.207e-10
PIN4	X:71406083-71406384	136	16	-18.913	0
PKIG	20:43218437-43218507	136	16	-18.9246	5.44009e-15
PRMT1	19:50183128-50183186	136	16	-18.9517	1.62437e-12
FAM96A	15:64373300-64373350	136	16	-18.9623	2.1814e-07
TBC1D17_AKT1S1	19:50382579-50382761	134	16	-18.9892	1.62448e-12
SLAIN2	4:48396592-48396670	134	16	-19.0287	7.822e-08
PDCD10	3:167443188-167443261	123	16	-19.0417	6.69143e-12
TNFRSF12A_HCFC1R1_THOC6	16:3073362-3073531	136	16	-19.0821	2.032e-08
COMMD3-BMI1_COMMD3	10:22607200-22607581	136	16	-19.092	2.43339e-12
C1orf52	1:85724617-85724744	131	16	-19.1007	6.5046e-07
RALGDS	9:135975882-135976906	120	16	-19.1187	1.62503e-12
CHTF8_CHTF8	16:69154955-69155073	128	16	-19.1326	5.20373e-12
CDC42BPB	14:103420534-103420612	124	16	-19.1363	3.4337e-11
TP53I13_RP11-68I3.2	17:27895526-27895566	133	13	-19.1366	0.0007578
HSCB_CHEK2	22:29141851-29141996	133	16	-19.144	1.5215e-10
NPC2_MIR4709	14:74947404-74947482	136	16	-19.1748	0
SKIV2L	6:31936399-31936462	136	16	-19.2331	1.62437e-12
RPAIN_CTC-524C5.2	17:5329402-5331531	136	16	-19.2471	1.97361e-05
SRSF7	2:38976039-38976381	126	16	-19.2821	7.0559e-09
TGIF2-C20orf24_C20orf24	20:35238003-35238133	135	16	-19.2901	0
ST7	7:116861976-116862116	136	16	-19.2928	3.33067e-16
ITGB1BP1	2:9554306-9554385	129	16	-19.2982	1.62448e-12
D2HGDH	2:242688279-242689344	136	16	-19.3167	1.0051e-09
TMEM161A	19:19243938-19244166	133	16	-19.3451	1.7587e-12
LLGL2	17:73570533-73570690	136	16	-19.3458	8.1528e-05
NDUFA5	7:123190523-123190640	136	16	-19.3559	0
KIFC3	16:57793036-57793065	136	16	-19.3678	4.2072e-05
PHF8	X:54020033-54020336	122	16	-19.3867	2.5741e-10
COX6C	8:100904135-100904275	136	16	-19.4093	4.5759e-08
KLHL10_NT5C3B	17:39991839-39991894	134	15	-19.4205	0
JMJD8_WDR24_STUB1	16:733860-733909	134	15	-19.4285	1.62448e-12
TRA2A	7:23561750-23562051	132	16	-19.4406	1.62448e-12
CCPG1_PIGB_DYX1C1-CCPG1	15:55651736-55651888	120	16	-19.4459	3.88578e-15
BRD8	5:137502206-137502416	128	16	-19.4467	0
RBM18_MRRF	9:125033142-125033354	135	16	-19.4555	1.62703e-12
ADAM15	1:155034379-155034593	136	16	-19.4663	0
PRKRA	2:179310152-179310262	130	16	-19.4765	0
TMEM161A	19:19243938-19244115	133	16	-19.5064	1.62437e-12
SREBF1	17:17720861-17720905	136	16	-19.5143	1.62448e-12
NRL_DCAF11	14:24586125-24586180	128	16	-19.5262	1.229e-10
NADK	1:1688217-1688321	136	16	-19.607	0
DXO_STK19	6:31939096-31939502	136	16	-19.6088	1.62437e-12
RP11-793H13.11_TARBP2	12:53895843-53895968	134	16	-19.6647	0
TJP2	9:71865950-71866280	136	16	-19.675	1.11022e-16
RPAIN	17:5331390-5331531	136	16	-19.7009	0
CARKD	13:111277536-111277625	135	16	-19.7395	4.0424e-07
ZNF688	16:30582754-30583442	126	15	-19.744	0.00166496
TAZ	X:153641589-153641695	136	16	-19.7559	1.62448e-12
RBM18_MRRF	9:125033142-125033354	135	16	-19.8046	1.62437e-12
RPAIN	17:5331390-5331531	136	16	-19.8634	0
SNRPA1	15:101827860-101827907	135	16	-19.8741	1.62448e-12
INO80E	16:30012851-30015978	136	16	-19.8776	9.48219e-12
BRD8	5:137495243-137495288	136	16	-19.8845	1.5001e-09
AP000295.9_IFNAR2	21:34634865-34635097	135	16	-19.8958	1.409e-08
MBD1	18:47800555-47800720	136	16	-19.9296	1.11022e-16
TMBIM1_PNKD	2:219146662-219146904	134	16	-19.9562	6.66134e-16
TMX2-CTNND1_CTNND1_RP11-691N7.6	11:57561481-57561553	129	16	-19.9934	1.62492e-12
CMC2	16:81030918-81031034	136	16	-19.9994	0
C14orf159	14:91690022-91690139	135	15	-20.0025	1.5098e-08
IDNK	9:86242921-86243126	125	13	-20.049	8.24119e-13
AC115618.1_RBM3	X:48433948-48434471	136	16	-20.0534	1.62448e-12
ZNF655_GS1-259H13.10	7:99159510-99160117	128	15	-20.064	6.5388e-07
STRA13	17:79977168-79977257	133	16	-20.0959	1.62459e-12
CTD-2651B20.1_SHF	15:45464080-45464200	135	14	-20.1411	1.63403e-12
MOCS1	6:39895067-39895194	123	15	-20.1948	1.71699e-05
LTBP4	19:41128854-41128926	136	13	-20.2158	0.00035862
YWHAE	17:1257504-1257641	136	16	-20.2251	0
CHTF8_CHTF8	16:69154955-69155073	129	16	-20.2463	0
RAB1A	2:65316072-65316204	136	16	-20.2514	0
RPS3A	4:152022126-152022164	136	16	-20.2552	5.9281e-07
RPS3A	4:152022126-152022237	136	16	-20.2617	5.8759e-07
RPS3A	4:152021578-152021740	136	16	-20.2645	5.8412e-07
DCAF8_DCAF8	1:160231074-160231140	122	16	-20.2652	2.88658e-15
YWHAE	17:1257504-1257641	136	16	-20.2748	0
IRF3	19:50166599-50166771	136	16	-20.3071	0
ZNF655_GS1-259H13.10	7:99159510-99159596	123	15	-20.3079	1.6812e-08
CCT7	2:73470131-73470257	136	16	-20.3936	5.44009e-15
DDX39A	19:14521359-14521417	136	16	-20.3998	1.62448e-12
HNRNPC	14:21730759-21731469	136	16	-20.4054	1.62448e-12
CCT7	2:73470100-73470257	136	16	-20.4639	1.63392e-12
CROCCP2	1:16952847-16952994	136	16	-20.492	3.2653e-06
GANAB	11:62406830-62406939	130	16	-20.4939	1.97842e-13
ETFA	15:76584771-76584854	136	16	-20.5001	0
TMEM150A	2:85827467-85827535	136	16	-20.5446	4.0357e-05
UAP1	1:162562521-162562572	136	16	-20.5553	0.00044174
TMEM126B_DLG2	11:85342730-85342852	136	16	-20.5698	0
TATDN1	8:125530982-125531058	124	16	-20.57	1.66245e-12
OSGEP_APEX1	14:20924072-20924260	136	16	-20.5752	1.62448e-12
MYL6_RP11-977G19.5_SMARCC2	12:56558086-56558152	135	16	-20.5939	0.00062066
JMJD6	17:74717344-74717433	134	16	-20.6095	1.62437e-12
ING4	12:6762395-6762562	135	16	-20.6928	1.62437e-12
RP11-322E11.6_INO80C	18:33058245-33058313	135	16	-20.7204	1.64935e-12
FLNB	3:58127584-58127623	127	16	-20.7264	3.9358e-05
PCYT2	17:79866872-79867197	136	16	-20.7512	0
CCT7	2:73470173-73470257	136	16	-20.7693	1.63325e-12
MCFD2_AC016722.4	2:47136161-47136316	124	16	-20.7758	0
RBM18_MRRF	9:125033231-125033354	135	16	-20.801	1.62448e-12
WBSCR22	7:73105245-73105342	136	16	-20.8169	0
IDS_IDS	X:148583604-148583707	126	16	-20.8224	1.3238e-11
INO80E	16:30013756-30014334	136	16	-20.8667	1.62437e-12
ISOC2	19:55967002-55967212	136	16	-20.8974	0.000139749
POP4	19:30102768-30102846	135	16	-20.9162	4.44089e-16
ADAM15	1:155033890-155033965	136	16	-20.9163	1.62448e-12
ALKBH3	11:43923065-43923275	136	15	-20.9253	1.62448e-12
CACFD1	9:136330443-136330569	136	16	-20.9454	1.3729e-07
CLDND1	3:98239976-98240281	130	16	-20.951	1.62437e-12
PLEKHM2	1:16047823-16047883	126	16	-20.9664	0.000135792
SFXN4	10:120920566-120920593	130	16	-20.9751	0.00064289
PCYT2	17:79866751-79867197	136	16	-21.0064	0
CELF1	11:47500492-47500504	120	16	-21.025	7.77156e-16
AAMDC_RSF1	11:77552064-77552106	134	16	-21.0265	9.99201e-16
WDR73	15:85189203-85189414	125	16	-21.029	3.2433e-08
RP11-640M9.2	1:144604409-144604477	132	16	-21.0433	1.1645e-08
SNRPA1	15:101827860-101827907	135	16	-21.06	1.62448e-12
CPSF3L	1:1254675-1254813	135	16	-21.0689	1.62437e-12
AC027601.1_ENTHD2	17:79206114-79206318	136	16	-21.0713	6.66134e-16
NME4_DECR2	16:456684-456833	136	16	-21.0763	0
ANXA7	10:75156276-75156341	135	16	-21.101	1.62459e-12
AASS	7:121721553-121721649	136	13	-21.1302	1.62448e-12
ETFA	15:76584771-76584854	136	16	-21.1519	0
MGRN1	16:4730032-4730098	135	16	-21.1656	4.2197e-07
TCF7L2	10:114920377-114920450	126	16	-21.1744	1.62459e-12
ECHDC1	6:127651953-127652175	129	16	-21.176	1.62448e-12
DGUOK	2:74166036-74166149	135	16	-21.226	1.62481e-12
PCYT2	17:79866913-79867197	136	16	-21.2338	1.62448e-12
DHRS4L2	14:24470071-24470293	128	13	-21.2526	9.2715e-07
RPAIN	17:5329290-5331531	136	16	-21.2608	0
LLGL2	17:73570533-73570576	136	16	-21.2904	2.3863e-05
EPN1	19:56188915-56189100	135	16	-21.2914	1.3546e-06
PTBP1	19:805012-805187	131	16	-21.3437	0
DCUN1D3_LYRM1_ERI2	16:20911619-20911857	120	14	-21.3572	0.000175932
MARK2	11:63671457-63671619	122	16	-21.3998	2.2777e-08
INO80E	16:30014756-30014847	136	16	-21.4265	0
TPM1	15:63335904-63336030	136	16	-21.4392	1.62448e-12
CLDND1	3:98239976-98240281	130	16	-21.4991	0
CMC2	16:81030918-81031034	136	16	-21.5162	0
MRPL55	1:228295368-228295570	136	16	-21.5391	1.62448e-12
CLDND1	3:98239976-98240221	130	16	-21.6149	1.62448e-12
NFYB	12:104525531-104525616	135	16	-21.6261	1.62459e-12
KLHL10_NT5C3B	17:39991839-39991934	134	15	-21.6282	0
FBXO18_ANKRD16	10:5947999-5948595	126	16	-21.631	1.62448e-12
INO80E	16:30012532-30015978	136	16	-21.6564	1.62448e-12
D2HGDH	2:242694045-242694161	136	14	-21.6699	1.4963e-07
PGAP2	11:3845112-3845365	128	16	-21.751	1.0265e-06
SARM1_SLC46A1	17:26727625-26727720	131	16	-21.835	1.6247e-12
AP000347.4_KB-1572G7.3_GUSBP11	22:23982494-23982610	136	14	-21.8445	1.26221e-12
PTBP1	19:804291-804438	135	16	-21.8482	0
TRA2B	3:185644388-185644522	135	16	-21.8523	1.62448e-12
GAS5_SNORD78	1:173835665-173835705	129	16	-21.8646	1.62448e-12
H2AFV	7:44880497-44880611	136	16	-21.8654	0
UBE2K	4:39747371-39747430	136	16	-21.9099	0
LETMD1	12:51449926-51450028	126	16	-21.912	1.0683e-10
MCFD2_AC016722.4	2:47136161-47136316	124	16	-21.9122	0
SMPD4	2:130918758-130918845	127	16	-21.9127	1.0633e-09
ACP1	2:272191-272305	136	16	-21.9376	0
RP11-45M22.3_MPRIP	17:17083920-17083983	136	16	-21.9424	0.000175937
SLC50A1	1:155110036-155110198	136	16	-21.9499	0
ADAM15	1:155033893-155033965	136	16	-21.9829	0
EIF2B5_EIF4G1	3:184035108-184035285	125	16	-22.0027	1.62448e-12
HSF4	16:67201205-67201305	134	14	-22.0033	3.0496e-08
TSC22D4	7:100074899-100075082	136	16	-22.0374	0
SNHG1	11:62622359-62622410	133	16	-22.061	2.8534e-07
EIF2B5_EIF4G1	3:184037476-184037589	125	16	-22.0964	1.62448e-12
SDS_SDSL	12:113865766-113865961	135	16	-22.1092	1.62448e-12
RFXANK	19:19307994-19308060	136	16	-22.1155	1.4122e-06
PUF60	8:144906482-144906569	136	16	-22.122	7.1744e-09
SREBF1	17:17720861-17721009	136	16	-22.2015	1.62448e-12
DUS3L	19:5786856-5786930	136	16	-22.2296	5.2446e-10
RP11-429J17.8_SCRIB	8:144873835-144873910	136	16	-22.2408	1.26898e-13
WBP1_INO80B	2:74686679-74686689	131	14	-22.3028	2.07045e-12
DNAJC8	1:28555432-28555534	134	16	-22.3191	0
DDX46	5:134125795-134125912	126	16	-22.3585	1.62448e-12
SHMT1	17:18238872-18238989	136	16	-22.3716	6.8639e-08
PIGQ	16:632247-632309	136	16	-22.3775	1.85084e-05
PLEKHA4	19:49342461-49342520	136	15	-22.5328	3.8657e-05
BAX	19:49458943-49459090	136	16	-22.6024	2.8458e-10
TAZ	X:153647962-153648085	134	16	-22.6598	0.000164243
THOP1	19:2811631-2811732	136	16	-22.7456	1.62448e-12
TAZ	X:153647881-153647962	133	16	-22.7709	1.66056e-12
AD000671.6_PSENEN_U2AF1L4_AC002398.9	19:36236025-36236088	124	16	-22.8015	7.06712e-12
HLA-C	6:31237302-31237862	136	16	-22.8109	0.0036185
PDXDC2P_RP11-419C5.2	16:70024499-70024586	135	15	-22.8299	4.5349e-07
AFMID	17:76202026-76202131	136	16	-22.874	0
CPSF7	11:61187941-61188861	136	16	-22.9038	2.67342e-13
PKIG	20:43218437-43218507	120	16	-22.9313	6.07758e-12
ASNSD1	2:190531921-190532322	136	16	-22.9873	0
MACF1	1:39946591-39946702	136	16	-23.0157	0.000160462
SNHG8	4:119200261-119200292	136	16	-23.0532	4.56302e-14
MTO1	6:74190015-74190090	135	16	-23.1008	1.62459e-12
SNHG1	11:62622359-62622604	134	16	-23.1733	0
TMEM256-PLSCR3_C17orf61-PLSCR3	17:7296462-7296785	135	16	-23.2096	4.6971e-08
CCNL2	1:1326676-1326955	134	16	-23.2373	0.00049656
RP11-762I7.5_SARNP_ORMDL2	12:56212874-56212957	135	16	-23.2706	1.62448e-12
PCNP	3:101298685-101298848	136	16	-23.2784	1.62459e-12
KLHL10_NT5C3B	17:39991839-39992209	130	15	-23.3196	0
TPM1	15:63353911-63353987	136	16	-23.3327	9.80438e-12
SRRT	7:100480385-100480711	135	16	-23.3991	0
PI4KB	1:151282686-151282731	133	16	-23.4111	1.81331e-11
GALE	1:24125376-24125502	136	16	-23.4358	6.8031e-09
PPT2_PPT2-EGFL8	6:32132355-32132458	128	16	-23.5154	3.33067e-16
C19orf47_PLD3	19:40871459-40871837	136	16	-23.6056	5.6148e-05
DHRS4_DHRS4-AS1	14:24434970-24435041	134	15	-23.6344	7.435e-10
PQLC1	18:77679183-77679400	136	16	-23.6627	8.5478e-10
ALKBH3	11:43923065-43923275	136	15	-23.6646	1.62448e-12
GTF3C1	16:27475640-27475715	134	16	-23.6733	3.70159e-12
SIRT6	19:4179100-4179283	132	16	-23.685	1.62448e-12
TRMT11	6:126327987-126328100	135	16	-23.6955	0
TEX22_MTA1	14:105911754-105911848	125	16	-23.7729	1.63902e-12
SGSM3	22:40797596-40797679	136	16	-23.7893	0
RPS24	10:79799958-79799983	136	16	-23.8045	0
RPS24	10:79799961-79799983	136	16	-23.8075	0
ALDH3A2	17:19575033-19575269	133	14	-23.8559	1.55598e-05
MYL6_MYL6B	12:56554409-56554454	136	16	-23.9749	2.1714e-05
TPST2	22:26940569-26940641	135	16	-23.9832	1.62448e-12
RASSF7	11:563395-563478	136	15	-24.0426	6.47815e-12
AC115618.1_RBM3	X:48434309-48434471	136	16	-24.0724	0
DDX39A	19:14521232-14521417	136	16	-24.0961	0
UPF3A	13:115051733-115051875	127	16	-24.1317	1.63047e-12
PPP2R5C	14:102252354-102252520	134	16	-24.17	0
IRF3	19:50164706-50165204	136	16	-24.2311	1.62448e-12
STRA13	17:79977516-79977570	136	16	-24.2741	1.9138e-11
IRF3	19:50163969-50164085	136	16	-24.2869	1.62437e-12
MICU1	10:74267912-74268027	126	14	-24.3097	1.11133e-13
RBM10	X:47039610-47039708	132	16	-24.3242	1.62448e-12
PLA2G4B_JMJD7-PLA2G4B	15:42134789-42135421	135	15	-24.3711	1.4448e-06
SNORD50_VPS29	12:110933992-110934008	135	16	-24.3712	1.62437e-12
STK25	2:242437649-242438053	136	16	-24.385	0
DEF8	16:90020696-90020784	127	16	-24.404	1.62437e-12
ABHD11	7:73152205-73152472	124	16	-24.4739	1.62448e-12
SGSM2	17:2270564-2270699	127	16	-24.4996	1.62503e-12
METTL17	14:21460250-21460282	136	16	-24.5188	4.10783e-15
USP15	12:62768170-62768316	133	16	-24.559	0
AC005594.3_DPP9	19:4683201-4683336	136	16	-24.5915	0
PRPF3	1:150300015-150300111	134	16	-24.6669	0
STX5	11:62598490-62598582	133	16	-24.695	1.62437e-12
PFDN5	12:53690027-53690059	135	16	-24.722	4.6765e-11
OSBPL9	1:52221991-52222030	133	16	-24.7238	1.0157e-06
HRAS	11:533276-533358	136	16	-24.7711	0
TRA2A	7:23561739-23562051	132	16	-24.8527	1.62437e-12
DEF8	16:90020650-90020784	127	16	-24.8702	1.62448e-12
HNRNPA2B1	7:26230612-26230748	136	16	-24.8944	1.62448e-12
[truncated: 280 more rows]
