# Supplementary material for: A human-specific switch of alternatively spliced AFMID isoforms contributes to TP53 mutations and tumor recurrence in hepatocellular carcinoma
Source: HighWire-hosted journal article supplement (doi:10.1101/gr.227181.117), 2018-02-15
Supplement: Supplemental_Table_S3.xlsx [file Supplemental_Table_S3.xlsx]

## Sheet: Table S3
Table S3. Splicing events detected in 50 adjacent normal liver samples versus 371 HCCs from TCGA
Gene Symbol	Target Exon	N	T	Average ΔPSI	p-value
PEMT	17:17494844-17494910	50	367	37.8953	0
MCRS1	12:49959998-49960624	44	347	34.2216	4.9919e-07
CEACAM1	19:43015727-43015780	50	360	27.3595	0
FN1	2:216236738-216237098	50	370	27.1598	0
ADHFE1	8:67365944-67366293	50	321	23.5203	1.62437e-12
NUMB	14:73745988-73746132	48	311	22.0322	1.62437e-12
FN1	2:216236831-216237098	50	370	21.2226	1.62448e-12
BIN1	2:127815048-127815177	50	366	20.8799	1.62437e-12
EHBP1	2:63215065-63215173	49	325	20.4694	0
HSF1_GS1-393G12.12	8:145537508-145537647	50	371	20.2067	1.62526e-12
PLOD3_ZNHIT1	7:100861766-100865077	42	340	20.062	1.49658e-13
ASPH	8:62556503-62556560	48	340	20.0201	0
THYN1_ACAD8	11:134123120-134123192	43	309	19.8993	0.00032185
FN1	2:216237023-216237098	50	370	19.5327	1.62448e-12
ZFAND1	8:82629483-82629523	45	310	18.7274	1.2372e-10
FN1	2:216245533-216245803	50	366	18.4369	1.11022e-16
RAP2C-AS1_MBNL3	X:131518690-131518726	46	297	18.3372	2.17748e-12
MYO1B	2:192267357-192267444	50	355	16.6985	1.62448e-12
MYO1B	2:192265474-192265561	50	355	16.3578	1.62448e-12
TMEM175	4:941942-942403	50	344	16.229	1.84297e-14
ARL16	17:79649179-79650156	43	361	16.1121	0.0052192
PCYT2	17:79865429-79865648	50	371	15.3347	1.62437e-12
ASPH	8:62557158-62557191	44	297	15.1136	1.1985e-10
SNRPA1	15:101826418-101826498	49	368	15.0981	1.63936e-12
GOLGA4	3:37402733-37402796	50	366	14.7826	0
MST1P2	1:16974278-16974562	45	312	14.7402	0.00029524
NASP	1:46072992-46074009	50	362	14.6884	1.62448e-12
MYL6_MYL6B_RP11-603J24.14	12:56552467-56552495	50	371	14.4955	1.5381e-07
MYL6_MYL6B_RP11-603J24.14	12:56552467-56552495	50	371	14.4897	1.5447e-07
MYL6_MYL6B_RP11-603J24.14	12:56552467-56552495	50	371	14.4891	1.5486e-07
MYL6_MYL6B_RP11-603J24.14	12:56552467-56552495	50	371	14.4891	1.4677e-07
COX20	1:245005245-245005360	50	370	14.4814	1.62481e-12
VEGFB	11:64004891-64004992	50	334	14.4529	8.88178e-16
SLC39A14	8:22269549-22269719	48	297	14.3729	0
DTX2	7:76126653-76126794	44	332	14.2448	1.2366e-09
SLC17A9	20:61594074-61594106	45	313	14.2443	2.3786e-06
CEACAM1_LIPE-AS1	19:43015727-43015780	50	360	14.2024	0
SRP9	1:225974563-225974687	49	339	14.0253	3.80929e-12
YBX3	12:10862506-10862713	49	347	13.6458	1.64313e-14
CTNNB1	3:41281309-41281312	50	366	13.6044	2.76446e-14
THOP1	19:2811595-2811732	50	371	13.3893	1.62481e-12
PICALM	11:85689112-85689136	49	340	13.261	4.44089e-16
THNSL2	2:88482466-88482592	47	335	13.2597	7.0952e-11
MAPKAPK5-AS1_AC003029.1	12:112277807-112278281	42	366	13.0597	0.0054152
E2F5_C8orf59	8:86131464-86131592	50	371	12.9499	2.88525e-12
NCOR2	12:124811954-124812092	47	355	12.8416	2.557e-11
PGPEP1	19:18474200-18480515	48	308	12.8068	0.000142946
KHK	2:27317344-27317479	50	368	12.7083	1.62437e-12
UGP2	2:64083439-64083567	50	350	12.6766	1.62459e-12
SLC17A9	20:61594086-61594106	45	313	12.6346	1.881e-05
UGP2	2:64083439-64083567	50	350	12.5932	1.62448e-12
BMP1	8:22058630-22059315	50	365	12.5908	1.8206e-09
AFMID	17:76200908-76200981	50	368	12.3477	0
SIK2_PPP2R1B	11:111608171-111608293	46	339	12.1046	1.8678e-07
BIN1	2:127815048-127815177	50	366	11.9733	0
BIN1	2:127815048-127815177	50	366	11.9423	0
TARS2	1:150468957-150469104	50	332	11.9277	6.7338e-10
CAST_CTC-506B8.1	5:96076448-96076487	48	338	11.9201	0.034936
SNORD57_SNORD56_NOP56_SNORA51_SNORD86	20:2636680-2636860	50	369	11.8477	1.62426e-12
YBX3	12:10862506-10865809	49	357	11.7401	4.967e-10
KTN1	14:56130672-56130759	49	360	11.7015	1.62437e-12
CREM	10:35468061-35468204	50	324	11.4347	2.0127e-06
LCMT1_RP11-266L9.2	16:25172422-25172525	47	347	11.4309	0.00078338
SMARCB1	22:24134054-24134081	50	360	11.3968	0
TMEM175	4:942198-942403	50	338	11.2762	1.62659e-12
LCMT1_RP11-266L9.2	16:25162874-25162936	46	344	11.1769	0.00153626
MARK4_TRAPPC6A	19:45681350-45681392	49	365	11.1426	1.62448e-12
FN1	2:216257653-216257926	50	356	11.113	0
PCBP2_RP11-793H13.8	12:53861588-53861627	50	371	11.0646	0
AC007319.1_TFPI	2:188378342-188378373	50	354	11.0451	0
CDHR5	11:618598-619180	50	351	11.0024	1.62448e-12
PMS2P5	7:74312262-74312349	42	298	10.9989	0.00154306
ANXA2	15:60689456-60689537	44	344	10.9816	0.000101054
ITIH4_RP5-966M1.6	3:52853769-52853955	50	366	10.9212	1.62437e-12
TTC8	14:89341369-89341453	45	310	10.8312	5.3405e-08
IP6K2	3:48731891-48731958	47	357	10.8168	0.0044638
DNAJC19	3:180704730-180704810	50	370	10.8048	1.11022e-16
REPS1	6:139247537-139251113	47	312	10.7274	4.3333e-07
CYP4A11	1:47400124-47400231	50	341	10.6939	1.62448e-12
CCNL2	1:1328058-1328183	50	344	10.6229	3.8977e-05
ECHDC2	1:53377462-53377693	49	339	10.5154	1.63437e-05
TM2D3	15:102191898-102192473	49	344	10.418	1.7626e-08
PPRC1	10:103904776-103904847	42	321	10.3733	1.88465e-05
CCNL2	1:1326245-1328183	50	355	10.3665	2.2722e-05
E2F5_C8orf59	8:86131551-86131592	50	371	10.3081	1.63425e-12
CREM	10:35467816-35467914	47	304	10.2325	5.7779e-05
LGALS9	17:25974144-25974458	49	366	10.1818	4.2717e-05
MYO9B	19:17321141-17321189	47	360	10.1454	1.71084e-05
CCNL2	1:1328169-1328183	50	344	10.1438	6.4771e-05
ARHGEF11	1:156908209-156909339	44	346	10.0955	0.0136965
MTCH1	6:36940427-36940478	50	370	10.0753	0
AP2B1	17:33997875-33997917	47	316	-10.015	7.1232e-08
GLTPD2	17:4692805-4692972	50	350	-10.0695	1.62437e-12
LINC00963	9:132255697-132255874	48	352	-10.0768	1.66389e-12
YIPF1	1:54320673-54320724	50	371	-10.0778	1.6267e-12
C19orf47_PLD3	19:40871624-40871837	50	349	-10.103	2.502e-08
NDUFA6-AS1_CYP2D6	22:42525034-42525187	50	323	-10.1451	1.62448e-12
SYNE4	19:36497324-36497573	44	302	-10.1639	0.000155831
UPB1	22:24917953-24917996	50	336	-10.1664	1.62459e-12
PI4KB	1:151282686-151282731	43	320	-10.1929	1.206e-06
RP11-696N14.1_ADH6	4:100131571-100131659	43	323	-10.2085	6.4411e-10
WFIKKN1_C16orf13	16:685280-685340	50	367	-10.2469	6.3068e-08
FAM211B_GGT1_SNRPD3	22:24984646-24985233	49	318	-10.2955	3.353e-08
TSC22D4	7:100075082-100075930	42	325	-10.3127	0.00024009
APOC4-APOC2_APOC4	19:45448005-45448147	50	341	-10.3636	3.4945e-11
NDEL1	17:8366637-8366672	50	328	-10.3874	1.65556e-12
CD44	11:35211519-35211612	46	300	-10.395	3.6893e-05
RPL8	8:146017629-146017750	47	368	-10.4056	0.023419
DCAF8_DCAF8	1:160231074-160231140	44	305	-10.5104	0.0029958
AFM	4:74365720-74365898	50	341	-10.511	0
ISOC2	19:55967002-55967212	50	371	-10.6404	0
UAP1	1:162562524-162562572	50	368	-10.6449	1.62459e-12
ALDH8A1	6:135250191-135250353	50	313	-10.6467	1.62437e-12
BLNK	10:97975076-97975145	50	325	-10.668	6.11511e-13
HMOX2_NMRAL1	16:4524423-4524554	47	331	-10.6806	4.0744e-07
MAGIX	X:49021200-49021428	44	305	-10.6875	1.5131e-07
DGUOK	2:74173845-74174033	50	371	-10.7104	1.62426e-12
CFHR2	1:196920029-196920158	50	355	-10.7364	0.00010348
IRF3	19:50167930-50168887	48	363	-10.7627	1.3007e-08
LRRFIP2	3:37163125-37163182	49	329	-10.7993	0.00040041
DCAF6	1:167992225-167992285	50	348	-10.8505	0
C16orf13	16:685611-685774	50	371	-10.8683	1.11022e-16
ECHDC2	1:53370705-53372283	50	371	-11.0731	0
DGUOK_DGUOK-AS1	2:74184251-74184367	50	371	-11.0783	1.63092e-12
BAG6_APOM	6:31620200-31620289	48	326	-11.1167	7.865e-09
HDDC2_TPD52L1	6:125578243-125578304	50	341	-11.1193	0
EIF2B5_CHRD	3:184105161-184105265	44	338	-11.1444	1.9075e-10
KIFC3	16:57793036-57793065	45	364	-11.1859	1.62448e-12
NF2	22:30079008-30079068	47	356	-11.1903	1.1412e-10
SGSM3	22:40797596-40797679	44	337	-11.2036	4.7396e-11
PGLYRP2	19:15586348-15587419	50	338	-11.2845	0
EGFL7	9:139559143-139559237	48	310	-11.3588	6.8537e-10
NUMB	14:73749066-73749213	47	303	-11.3666	2.05358e-12
SNHG11	20:37076572-37076736	45	367	-11.3775	1.1317e-07
RAB17	2:238494640-238494706	50	344	-11.4041	0
RPL6	12:112847214-112847390	48	360	-11.4085	0.0086772
LETMD1	12:51449926-51450028	46	331	-11.4275	5.72509e-12
SLC17A9	20:61594074-61594086	45	313	-11.4562	3.6983e-05
NUDT7	16:77769724-77769883	50	331	-11.4836	2.1125e-05
PCSK6	15:101871855-101871894	50	347	-11.5291	0
TATDN1	8:125530982-125531058	47	354	-11.5693	3.5646e-06
OPN3	1:241767561-241767881	48	321	-11.6181	4.71656e-12
DRG2	17:18001583-18001673	47	365	-11.649	9.7963e-07
TMEM175_GAK	4:941496-941942	46	316	-11.7192	0.000155452
PRKDC	8:48694722-48694815	46	320	-11.7426	6.7974e-10
RPAIN	17:5329555-5329619	50	371	-11.7448	1.62481e-12
NUMA1	11:71723446-71723488	48	347	-11.7956	8.78964e-13
RPAIN	17:5329555-5329619	46	361	-11.8308	1.7168e-10
WFIKKN1_C16orf13	16:685280-685340	50	371	-11.849	5.9619e-14
PCSK6	15:101971524-101971668	48	318	-12.0329	1.62448e-12
TACC2	10:123974905-123974917	40	306	-12.0489	1.78646e-12
UPP1	7:48141420-48141579	48	367	-12.1076	5.608e-09
DHRS4_DHRS4-AS1	14:24435140-24435192	48	367	-12.116	5.5718e-11
ASPH	8:62531536-62531578	48	325	-12.1271	8.7267e-11
VEGFA	6:43748468-43748540	49	352	-12.1408	1.64113e-12
UBE2D3	4:103748583-103748748	50	346	-12.191	1.9979e-11
ACP1	2:272191-272305	50	371	-12.2464	1.62448e-12
RPS24	10:79799958-79799983	50	371	-12.3795	0
RPS24	10:79799961-79799983	50	371	-12.3795	0
HPS1	10:100189547-100189646	49	358	-12.4749	1.62448e-12
PIGQ	16:632247-632309	50	348	-12.4951	2.1956e-09
SRP9	1:225976941-225976960	49	341	-12.6512	8.8195e-11
INO80E	16:30012734-30012851	50	369	-12.6592	1.11022e-16
RP11-429J17.8_SCRIB	8:144873835-144873910	45	369	-12.7085	6.8697e-08
HDDC2_TPD52L1	6:125574862-125574901	50	341	-12.7092	1.62459e-12
PIGQ	16:632247-632309	50	348	-12.7638	2.2132e-07
PPIL2	22:22051035-22051173	40	309	-12.7769	1.88723e-05
THOP1	19:2811631-2811732	50	371	-12.7892	1.62848e-12
UGP2	2:64083439-64083567	42	348	-12.9241	0
SYNE4	19:36497651-36497846	41	302	-12.9374	4.1881e-05
UGP2	2:64084962-64085070	42	348	-12.9749	0
HLA-C	6:31237302-31237862	50	371	-12.9929	0.042505
BAIAP2	17:79084713-79084759	50	366	-13.1781	1.62437e-12
PMS2P5_Y_RNA	7:74312515-74312628	41	297	-13.3154	2.118e-06
LETMD1	12:51449617-51449804	49	343	-13.387	9.8309e-09
NDRG2	14:21491022-21491064	50	351	-13.3898	1.62437e-12
NR1I3	1:161206248-161206388	50	303	-13.5144	1.62426e-12
GUSB	7:65439905-65440058	50	365	-13.5383	0
ZDHHC16	10:99213555-99213603	50	362	-13.5425	0
STRA13	17:79977516-79977570	50	370	-13.578	1.11022e-16
UPP1	7:48139266-48139384	49	367	-13.5807	2.56029e-12
TAZ	X:153647962-153648085	43	355	-13.5953	5.2334e-11
CASC4	15:44695084-44695252	48	311	-13.6119	0
CYP4A11	1:47400124-47400231	46	325	-13.7394	1.62448e-12
UGP2	2:64084962-64085070	50	350	-13.7414	1.62448e-12
TP53I13_RP11-68I3.2	17:27895526-27895566	46	320	-13.8032	0.0003174
DHRS4_DHRS4-AS1	14:24434970-24435041	50	371	-13.8096	1.62559e-12
UGP2	2:64084962-64085070	50	350	-13.8177	0
SLAIN2	4:48396592-48396670	49	348	-13.8727	7.39409e-14
FAM192A	16:57219732-57219736	46	343	-13.9549	7.697e-09
ADAM15	1:155034379-155034451	50	371	-13.9668	1.1642e-09
CTNNB1	3:41281150-41281309	50	366	-14.0414	1.63358e-12
MRPL55	1:228296849-228296961	50	371	-14.0443	8.64e-09
CYP4A11	1:47400671-47400826	50	335	-14.0935	0
KHK	2:27317667-27317802	50	368	-14.2315	1.62448e-12
CTNNB1	3:41281150-41281312	50	366	-14.2788	7.99361e-15
RRNAD1	1:156703844-156704285	50	369	-14.3618	1.87228e-12
SYNE4	19:36498026-36498170	43	305	-14.4256	2.2271e-07
CYP4A11	1:47399617-47399751	48	334	-14.4852	0
PPHLN1	12:42745686-42745851	47	336	-14.5573	5.83766e-12
TMEM126B_DLG2	11:85342188-85342360	44	342	-14.6378	6.81144e-12
RPAIN	17:5329290-5329402	41	355	-14.7069	1.11022e-16
FAM192A	16:57219732-57219942	46	343	-14.7127	1.6234e-09
ARFGAP2	11:47194260-47194302	49	353	-14.7383	1.65745e-12
AFMID	17:76201520-76201599	50	368	-14.778	0
BIN1	2:127808729-127808819	50	369	-14.832	0
ABCB4	7:87041208-87041349	50	327	-14.837	0
MACF1	1:39946591-39946702	50	358	-14.902	1.62459e-12
RGN	X:46939715-46940335	50	347	-14.9464	0
CYP4A11	1:47399847-47400038	50	339	-14.9924	1.62448e-12
UAP1	1:162562521-162562572	50	368	-15.3332	1.62437e-12
SLC39A14	8:22267458-22267628	48	297	-15.4035	1.62448e-12
PCYT2	17:79865079-79865133	50	371	-15.4705	0
GSTZ1_POMT2	14:77791212-77791264	50	350	-15.4946	1.62459e-12
AFMID	17:76198783-76198832	50	369	-15.6473	1.62459e-12
ECHDC2	1:53370762-53372283	50	371	-15.8334	0
EXOC7	17:74086409-74086478	49	347	-15.9138	1.33227e-14
AFMID	17:76202026-76202131	50	368	-15.9931	1.62448e-12
LETMD1	12:51447560-51447643	48	345	-16.0731	7.07512e-12
LETMD1	12:51445874-51445990	49	345	-16.1436	4.44089e-16
ABLIM3_AC012613.2_RP11-331K21.1	5:148622053-148622101	49	299	-16.2131	1.11022e-16
ECHDC2	1:53372190-53372283	50	371	-16.2702	0
BCAP29	7:107258772-107262074	50	371	-16.3853	1.62537e-12
DHRS4L2	14:24470071-24470142	48	354	-16.5178	5.4978e-08
LTBP3	11:65307483-65307624	44	340	-16.9083	1.9613e-11
AFMID	17:76201683-76201834	50	368	-17.2664	1.62448e-12
PTCD1_ATP5J2_ATP5J2-PTCD1	7:99057708-99057846	50	371	-17.4619	7.4245e-08
APLP2	11:129993506-129993674	50	361	-18.1566	1.62448e-12
CHID1	11:908541-908645	43	334	-18.6849	0.00075576
ODF2	9:131258420-131258576	42	314	-18.6878	3.3851e-07
CHID1	11:914744-914746	48	345	-19.3144	5.5605e-09
TMEM175_GAK	4:941903-941942	46	316	-20.1095	3.1346e-06
NF2	22:30079008-30079053	47	356	-20.3936	0
TCF20	22:42564614-42564742	47	338	-20.747	1.11022e-16
ARHGEF10L	1:17961042-17961057	47	332	-20.8097	0
METTL5	2:170681291-170681377	41	343	-21.6416	4.4202e-05
PTCD1_ATP5J2_ATP5J2-PTCD1	7:99063733-99063751	47	362	-21.7918	2.0706e-05
KHK	2:27317667-27317802	50	367	-22.1413	1.62448e-12
GOLGA2	9:131029472-131029553	43	299	-22.8983	0
AFMID	17:76200736-76200822	50	368	-23.7121	1.62437e-12
AFMID	17:76200908-76200981	50	368	-23.915	0
LRRFIP2	3:37132957-37133029	48	344	-24.7002	1.62448e-12
RP4-583P15.15_ZGPAT	20:62365996-62366176	50	371	-24.9442	1.62448e-12
RPS24	10:79799961-79799983	50	371	-25.8739	0
THNSL2	2:88484846-88484998	48	348	-26.5244	0
UGP2	2:64069192-64069338	50	342	-26.9852	0
AFMID	17:76201173-76201271	50	368	-27.4004	0
AFMID	17:76201683-76201819	50	368	-28.2853	1.62437e-12
AFMID	17:76201520-76201599	50	368	-30.8341	1.62448e-12
USO1	4:76716488-76716509	46	303	-46.543	1.62437e-12
