# Supplementary material for: A human-specific switch of alternatively spliced AFMID isoforms contributes to TP53 mutations and tumor recurrence in hepatocellular carcinoma
Source: HighWire-hosted journal article supplement (doi:10.1101/gr.227181.117), 2018-02-15
Supplement: Supplemental_Table_S4.xlsx [file Supplemental_Table_S4.xlsx]

## Sheet: Table S4
Table S4. Splicing events associated with overall and recurrence-free survival
Gene Symbol	Target Exon	-log10(overall p-value)	-log10(recurrence-free p-value)	F1 score
AFMID	17:76200908-76200981	2.84002	3.6325	1.59387
AFMID	17:76200736-76200822	2.45656	4.4437	1.582
C16orf13	16:685611-685774	2.76934	3.63756	1.57231
AFMID	17:76202026-76202131	3.57397	2.76547	1.55908
AFMID	17:76201520-76201599	3.81825	2.56588	1.53461
AFMID	17:76201683-76201834	2.90449	2.89225	1.44918
SLAIN2	4:48396592-48396670	3.74031	2.35126	1.44371
AFMID	17:76201683-76201819	2.61792	3.0122	1.40063
STRA13	17:79977516-79977570	4.2623	2.07702	1.3965
AFMID	17:76201173-76201271	2.4148	2.73743	1.28301
ACP1	2:272191-272305	3.40677	1.94874	1.23964
KHK	2:27317344-27317479	2.06542	3.07525	1.23558
UGP2	2:64084962-64085070	2.19628	2.811	1.23295
SNRPA1	15:101826418-101826498	1.70293	3.99222	1.19373
MBD1	18:47800555-47800723	3.0284	1.73322	1.10233
STRA13	17:79977183-79977257	2.35491	2.03193	1.09077
GUSB	7:65439905-65440058	2.41691	1.97256	1.08612
FN1	2:216236738-216237098	1.90909	2.50033	1.08254
UGP2	2:64083439-64083567	1.90636	2.29322	1.04099
UGP2	2:64069192-64069338	2.22021	1.95241	1.03886
KHK	2:27317667-27317802	2.76854	1.47823	0.963682
ZDHHC16	10:99213555-99213603	2.01174	1.68117	0.915829
VPS29	12:110937339-110937351	2.68852	1.38693	0.914937
ISOC2	19:55967002-55967212	1.81916	1.78984	0.90219
KLC1	14:104153417-104153548	2.05003	1.53038	0.876246
MYO1B	2:192267357-192267444	1.56408	1.93559	0.86506
DCAF6	1:167992225-167992285	1.67537	1.69112	0.841604
FN1	2:216245533-216245803	1.6833	1.6522	0.833804
ARFGAP2	11:47194976-47195033	1.91793	1.40312	0.810312
VEGFB	11:64004891-64004992	1.67341	1.56027	0.807432
NOP56	20:2636680-2636860	1.7494	1.32216	0.753034
NUMA1	11:71723446-71723488	1.63694	1.39303	0.752585
