# Supplementary material for: A human-specific switch of alternatively spliced AFMID isoforms contributes to TP53 mutations and tumor recurrence in hepatocellular carcinoma
Source: HighWire-hosted journal article supplement (doi:10.1101/gr.227181.117), 2018-02-15
Supplement: Supplemental_Table_S5.xlsx [file Supplemental_Table_S5.xlsx]

## Sheet: Table S5
Table S5. Enrichment results for non-silent mutations
Gene Symbol	Number of mutated HCCs in High	Number of High	Number of Low	Number of mutated HCCs	Hypergeometric p-value
TTN	27	184	185	56	0.111238
TP53	17	184	185	54	0.00160165
CTNNB1	25	184	185	49	0.119966
MUC16	16	184	185	35	0.123615
APOB	13	184	185	24	0.15208
RYR2	8	184	185	20	0.122111
LRP1B	7	184	185	19	0.0965848
ABCA13	8	184	185	19	0.147375
OBSCN	7	184	185	18	0.123054
CSMD3	7	184	185	18	0.123054
USH2A	4	184	185	16	0.0265297
CACNA1E	6	184	185	16	0.123516
PCLO	9	184	185	16	0.176451
XIRP2	8	184	185	16	0.200763
ARID1A	5	184	185	15	0.0916018
ALB	6	184	185	15	0.155272
GPR98	8	184	185	15	0.199635
FAT3	9	184	185	14	0.12044
MLL3	8	184	185	14	0.184765
FLG	6	184	185	14	0.186853
UNC80	6	184	185	14	0.186853
DMD	6	184	185	14	0.186853
CSMD1	7	184	185	14	0.213546
HMCN1	7	184	185	13	0.212353
SPTA1	6	184	185	13	0.213546
PKHD1L1	6	184	185	13	0.213546
WDR87	2	184	185	12	0.0153185
SYNE2	3	184	185	12	0.0528025
BIRC6	8	184	185	12	0.118806
MUC2	7	184	185	12	0.194385
FBN2	5	184	185	12	0.196569
SDK1	5	184	185	12	0.196569
FREM2	5	184	185	12	0.196569
DNAH6	6	184	185	12	0.22933
LRP1	6	184	185	12	0.22933
COL6A6	6	184	185	12	0.22933
FRAS1	2	184	185	11	0.0259661
RYR3	8	184	185	11	0.0778982
HERC2	7	184	185	11	0.160197
CHL1	7	184	185	11	0.160197
UNC79	7	184	185	11	0.160197
DNAH9	7	184	185	11	0.160197
RP1	7	184	185	11	0.160197
PTPN13	7	184	185	11	0.160197
AHNAK2	6	184	185	11	0.228056
VCAN	6	184	185	11	0.228056
HYDIN	5	184	185	11	0.22933
ZNF469	5	184	185	11	0.22933
FBN1	5	184	185	11	0.22933
LAMA1	5	184	185	11	0.22933
GCN1L1	5	184	185	11	0.22933
RB1	8	184	185	10	0.0416773
FAT2	7	184	185	10	0.114907
GLI2	7	184	185	10	0.114907
HTT	7	184	185	10	0.114907
DNAH5	3	184	185	10	0.117489
NBEA	3	184	185	10	0.117489
ALMS1	6	184	185	10	0.205606
DNAH1	6	184	185	10	0.205606
DCHS2	6	184	185	10	0.205606
DNAH10	4	184	185	10	0.207903
PRKDC	4	184	185	10	0.207903
MLL2	5	184	185	10	0.249484
PCDH15	5	184	185	10	0.249484
SYNE1	5	184	185	10	0.249484
DYNC2H1	5	184	185	10	0.249484
CUBN	5	184	185	10	0.249484
LRRIQ1	5	184	185	10	0.249484
TRPA1	1	184	185	9	0.0169535
LRP2	7	184	185	9	0.0678139
NEB	2	184	185	9	0.0697187
DOCK2	2	184	185	9	0.0697187
ZFHX4	2	184	185	9	0.0697187
KIF19	6	184	185	9	0.162677
PTPRQ	6	184	185	9	0.162677
CUL9	6	184	185	9	0.162677
FASN	6	184	185	9	0.162677
DMBT1	6	184	185	9	0.162677
KNDC1	3	184	185	9	0.165404
CCDC168	5	184	185	9	0.248105
TPO	5	184	185	9	0.248105
SEMA6D	5	184	185	9	0.248105
BAP1	5	184	185	9	0.248105
PREX2	4	184	185	9	0.249484
COL6A3	4	184	185	9	0.249484
MUC4	4	184	185	9	0.249484
ROBO2	4	184	185	9	0.249484
ARID1B	4	184	185	9	0.249484
DNAH7	4	184	185	9	0.249484
MYO3A	4	184	185	9	0.249484
IGF2R	7	184	185	8	0.0295662
PKHD1	1	184	185	8	0.0305628
ZNF638	6	184	185	8	0.10697
PCDH11Y	6	184	185	8	0.10697
CADPS	2	184	185	8	0.10936
ANKRD12	2	184	185	8	0.10936
AHNAK	2	184	185	8	0.10936
NOS1	2	184	185	8	0.10936
ZNF208	2	184	185	8	0.10936
SVEP1	5	184	185	8	0.21872
MYT1L	5	184	185	8	0.21872
DOCK10	5	184	185	8	0.21872
DST	5	184	185	8	0.21872
FCGBP	5	184	185	8	0.21872
SACS	3	184	185	8	0.221151
EVPL	3	184	185	8	0.221151
DNAH17	3	184	185	8	0.221151
EYS	3	184	185	8	0.221151
DCHS1	3	184	185	8	0.221151
MYO18B	4	184	185	8	0.276438
DNAH8	4	184	185	8	0.276438
KIF26B	4	184	185	8	0.276438
PXDNL	4	184	185	8	0.276438
PKD1L1	4	184	185	8	0.276438
WDFY4	4	184	185	8	0.276438
RP1L1	4	184	185	8	0.276438
RYR1	4	184	185	8	0.276438
KDR	4	184	185	8	0.276438
MYH7	4	184	185	8	0.276438
ABCA4	4	184	185	8	0.276438
DNAH2	4	184	185	8	0.276438
SPEG	4	184	185	8	0.276438
ZNF536	0	184	185	7	0.00751612
FAM47A	6	184	185	7	0.0526129
USP19	6	184	185	7	0.0526129
COL11A1	6	184	185	7	0.0526129
GNAS	6	184	185	7	0.0526129
GRIA2	6	184	185	7	0.0526129
SETD2	6	184	185	7	0.0526129
RNF213	6	184	185	7	0.0526129
REV3L	1	184	185	7	0.0540825
MYOF	1	184	185	7	0.0540825
TG	1	184	185	7	0.0540825
MACF1	5	184	185	7	0.162247
SLIT2	5	184	185	7	0.162247
HNF1A	5	184	185	7	0.162247
TNXB	5	184	185	7	0.162247
ASTN1	5	184	185	7	0.162247
VPS13C	5	184	185	7	0.162247
FREM1	5	184	185	7	0.162247
UBR4	5	184	185	7	0.162247
FANCM	5	184	185	7	0.162247
PLCB4	5	184	185	7	0.162247
WDR17	5	184	185	7	0.162247
C16orf96	5	184	185	7	0.162247
ROBO1	5	184	185	7	0.162247
TEK	2	184	185	7	0.164952
ADAMTSL1	2	184	185	7	0.164952
SPTBN1	2	184	185	7	0.164952
MUC17	2	184	185	7	0.164952
MAP1B	2	184	185	7	0.164952
LRRK2	2	184	185	7	0.164952
COL12A1	2	184	185	7	0.164952
FAT4	2	184	185	7	0.164952
STAB1	2	184	185	7	0.164952
CRB1	4	184	185	7	0.274919
PRDM2	4	184	185	7	0.274919
DSCAM	4	184	185	7	0.274919
UNC13C	4	184	185	7	0.274919
CHD7	4	184	185	7	0.274919
AKAP13	4	184	185	7	0.274919
MXRA5	4	184	185	7	0.274919
KIAA1109	4	184	185	7	0.274919
NLGN1	4	184	185	7	0.274919
RIMS1	4	184	185	7	0.274919
ATP8A2	4	184	185	7	0.274919
CELSR1	4	184	185	7	0.274919
JARID2	4	184	185	7	0.274919
PREX1	4	184	185	7	0.274919
HECW2	4	184	185	7	0.274919
INADL	4	184	185	7	0.274919
NPAP1	4	184	185	7	0.274919
SCAPER	4	184	185	7	0.274919
DYNC1H1	4	184	185	7	0.274919
KCNB2	4	184	185	7	0.274919
TSC2	4	184	185	7	0.274919
NAV3	4	184	185	7	0.274919
NLGN4X	4	184	185	7	0.274919
DCC	3	184	185	7	0.276438
ADAMTS18	3	184	185	7	0.276438
PIK3CA	3	184	185	7	0.276438
FBN3	3	184	185	7	0.276438
RGPD4	3	184	185	7	0.276438
SPEN	3	184	185	7	0.276438
COL5A2	3	184	185	7	0.276438
PCDH7	3	184	185	7	0.276438
SORCS3	3	184	185	7	0.276438
SEZ6L	3	184	185	7	0.276438
GRXCR1	3	184	185	7	0.276438
ITPR3	3	184	185	7	0.276438
THSD7B	3	184	185	7	0.276438
KEAP1	3	184	185	7	0.276438
PTPRM	3	184	185	7	0.276438
ADAMTS9	3	184	185	7	0.276438
ZNF804B	3	184	185	7	0.276438
SMARCA4	3	184	185	7	0.276438
MLL4	3	184	185	7	0.276438
POLQ	3	184	185	7	0.276438
ATM	3	184	185	7	0.276438
CARD11	3	184	185	7	0.276438
TTC40	3	184	185	7	0.276438
MDN1	3	184	185	7	0.276438
MYH15	3	184	185	7	0.276438
VWDE	3	184	185	7	0.276438
TDRD1	3	184	185	7	0.276438
SCN3A	6	184	185	6	0.0147478
KIAA1210	6	184	185	6	0.0147478
ADCY2	5	184	185	6	0.0914532
LAMA3	5	184	185	6	0.0914532
CENPE	5	184	185	6	0.0914532
OTOGL	5	184	185	6	0.0914532
SHANK2	5	184	185	6	0.0914532
PCDHAC2	5	184	185	6	0.0914532
TJP1	5	184	185	6	0.0914532
SPTB	5	184	185	6	0.0914532
PCDHA5	5	184	185	6	0.0914532
KIAA0947	5	184	185	6	0.0914532
IRX1	5	184	185	6	0.0914532
DNAH12	5	184	185	6	0.0914532
TENM2	5	184	185	6	0.0914532
TRIP12	1	184	185	6	0.0934855
ASCC3	1	184	185	6	0.0934855
EPB41L3	1	184	185	6	0.0934855
CYLC1	1	184	185	6	0.0934855
NOTCH3	1	184	185	6	0.0934855
MYO9B	1	184	185	6	0.0934855
SAGE1	1	184	185	6	0.0934855
COL7A1	1	184	185	6	0.0934855
LRP4	4	184	185	6	0.233714
DSCAML1	4	184	185	6	0.233714
SEMA3A	4	184	185	6	0.233714
NSD1	4	184	185	6	0.233714
PDE4DIP	4	184	185	6	0.233714
AFF2	4	184	185	6	0.233714
THADA	4	184	185	6	0.233714
ADAM12	4	184	185	6	0.233714
PTK2	4	184	185	6	0.233714
CREBBP	4	184	185	6	0.233714
MAB21L1	4	184	185	6	0.233714
ZNF676	4	184	185	6	0.233714
C3	4	184	185	6	0.233714
ACACB	4	184	185	6	0.233714
COL6A5	4	184	185	6	0.233714
ALK	4	184	185	6	0.233714
MYH4	4	184	185	6	0.233714
PRUNE2	4	184	185	6	0.233714
FHOD3	4	184	185	6	0.233714
GLI3	4	184	185	6	0.233714
BMPER	4	184	185	6	0.233714
KNTC1	4	184	185	6	0.233714
CAND1	4	184	185	6	0.233714
THSD7A	4	184	185	6	0.233714
MYO6	4	184	185	6	0.233714
TRPM3	4	184	185	6	0.233714
USP48	4	184	185	6	0.233714
ABCA1	4	184	185	6	0.233714
C20orf26	4	184	185	6	0.233714
BICD1	2	184	185	6	0.236296
TTC28	2	184	185	6	0.236296
ZFPM2	2	184	185	6	0.236296
KALRN	2	184	185	6	0.236296
CDH7	2	184	185	6	0.236296
TLR8	2	184	185	6	0.236296
TRAPPC9	2	184	185	6	0.236296
TAF1	2	184	185	6	0.236296
SPAG17	2	184	185	6	0.236296
ZNF91	2	184	185	6	0.236296
TEX15	2	184	185	6	0.236296
AXIN1	2	184	185	6	0.236296
OPRM1	2	184	185	6	0.236296
DPP10	2	184	185	6	0.236296
COL16A1	2	184	185	6	0.236296
CDH9	2	184	185	6	0.236296
FER1L5	2	184	185	6	0.236296
ASPM	2	184	185	6	0.236296
MLL	2	184	185	6	0.236296
CLTCL1	2	184	185	6	0.236296
TRPS1	2	184	185	6	0.236296
CCDC136	2	184	185	6	0.236296
DNHD1	2	184	185	6	0.236296
ATP9A	2	184	185	6	0.236296
CNTNAP4	2	184	185	6	0.236296
MYO10	2	184	185	6	0.236296
PRICKLE2	2	184	185	6	0.236296
ZFC3H1	2	184	185	6	0.236296
CNGA3	2	184	185	6	0.236296
HSPG2	2	184	185	6	0.236296
ABCC8	2	184	185	6	0.236296
ZNF578	2	184	185	6	0.236296
TSC1	2	184	185	6	0.236296
NLRP3	2	184	185	6	0.236296
PHRF1	2	184	185	6	0.236296
CACNA1B	2	184	185	6	0.236296
ADAMTS20	3	184	185	6	0.315061
UNC45B	3	184	185	6	0.315061
TENM3	3	184	185	6	0.315061
PXDN	3	184	185	6	0.315061
HIVEP1	3	184	185	6	0.315061
CSMD2	3	184	185	6	0.315061
CCDC146	3	184	185	6	0.315061
ABCA12	3	184	185	6	0.315061
MUC5B	3	184	185	6	0.315061
ASXL1	3	184	185	6	0.315061
PAK7	3	184	185	6	0.315061
DNAH14	3	184	185	6	0.315061
PLXNA4	3	184	185	6	0.315061
KCNAB1	3	184	185	6	0.315061
DIP2C	3	184	185	6	0.315061
NDST4	3	184	185	6	0.315061
CELSR2	3	184	185	6	0.315061
RANBP2	3	184	185	6	0.315061
ITPR1	3	184	185	6	0.315061
PIWIL4	3	184	185	6	0.315061
CLSTN2	3	184	185	6	0.315061
GRIA4	3	184	185	6	0.315061
ARID2	3	184	185	6	0.315061
MYO18A	3	184	185	6	0.315061
FSIP2	3	184	185	6	0.315061
DBN1	3	184	185	6	0.315061
ELTD1	3	184	185	6	0.315061
TNRC18	3	184	185	6	0.315061
BAZ2B	3	184	185	6	0.315061
ANO4	3	184	185	6	0.315061
LRRK1	3	184	185	6	0.315061
PCDHB16	3	184	185	6	0.315061
TCF20	3	184	185	6	0.315061
NYNRIN	3	184	185	6	0.315061
CHD9	5	184	185	5	0.0299901
IRS4	5	184	185	5	0.0299901
NCOA3	5	184	185	5	0.0299901
HGF	5	184	185	5	0.0299901
HEATR5B	5	184	185	5	0.0299901
INSRR	5	184	185	5	0.0299901
EFEMP1	0	184	185	5	0.0308231
ARHGAP35	0	184	185	5	0.0308231
TMEM132D	0	184	185	5	0.0308231
DSEL	0	184	185	5	0.0308231
ATP13A4	0	184	185	5	0.0308231
GPHN	0	184	185	5	0.0308231
PLEKHG3	0	184	185	5	0.0308231
PDCD11	0	184	185	5	0.0308231
FHDC1	0	184	185	5	0.0308231
RPS6KA6	0	184	185	5	0.0308231
AKAP4	0	184	185	5	0.0308231
SPATA31C1	0	184	185	5	0.0308231
EPHA3	0	184	185	5	0.0308231
HUWE1	0	184	185	5	0.0308231
SEMA3D	0	184	185	5	0.0308231
BSN	0	184	185	5	0.0308231
SALL1	4	184	185	5	0.154115
PLXNB3	4	184	185	5	0.154115
RELN	4	184	185	5	0.154115
EFCAB13	4	184	185	5	0.154115
EEF1A1	4	184	185	5	0.154115
NCOA6	4	184	185	5	0.154115
ADAM29	4	184	185	5	0.154115
SCN10A	4	184	185	5	0.154115
CAMTA2	4	184	185	5	0.154115
OVCH1	4	184	185	5	0.154115
BAZ1A	4	184	185	5	0.154115
SETD1A	4	184	185	5	0.154115
ACVR2A	4	184	185	5	0.154115
NCKAP5	4	184	185	5	0.154115
CHSY3	4	184	185	5	0.154115
PLCG2	4	184	185	5	0.154115
CADM1	4	184	185	5	0.154115
SHPRH	4	184	185	5	0.154115
HERC1	4	184	185	5	0.154115
PDE3A	4	184	185	5	0.154115
ERBB2IP	4	184	185	5	0.154115
CCDC141	1	184	185	5	0.15667
KIAA1211L	1	184	185	5	0.15667
PKD1	1	184	185	5	0.15667
TNRC6A	1	184	185	5	0.15667
SPEF2	1	184	185	5	0.15667
AMER1	1	184	185	5	0.15667
ATP1A2	1	184	185	5	0.15667
ARHGAP31	1	184	185	5	0.15667
SFMBT2	1	184	185	5	0.15667
HIP1	1	184	185	5	0.15667
PDZD2	1	184	185	5	0.15667
PCDHA8	1	184	185	5	0.15667
KIF20B	1	184	185	5	0.15667
PCNXL2	1	184	185	5	0.15667
C1orf173	1	184	185	5	0.15667
NLRP2	1	184	185	5	0.15667
WDR49	1	184	185	5	0.15667
SLC1A6	1	184	185	5	0.15667
ITGAD	1	184	185	5	0.15667
CNTNAP2	1	184	185	5	0.15667
PDZRN3	1	184	185	5	0.15667
PSMD1	1	184	185	5	0.15667
CDH18	1	184	185	5	0.15667
PRPF8	1	184	185	5	0.15667
KIAA1731	1	184	185	5	0.15667
TET1	1	184	185	5	0.15667
PZP	1	184	185	5	0.15667
SHROOM4	1	184	185	5	0.15667
ERBB3	1	184	185	5	0.15667
SLITRK5	1	184	185	5	0.15667
CTNND2	1	184	185	5	0.15667
DMXL2	1	184	185	5	0.15667
CACNA1H	1	184	185	5	0.15667
ZNF429	1	184	185	5	0.15667
FYCO1	1	184	185	5	0.15667
CNTLN	1	184	185	5	0.15667
SSPO	3	184	185	5	0.31334
HDAC9	3	184	185	5	0.31334
TFAP2D	3	184	185	5	0.31334
LDB3	3	184	185	5	0.31334
PSD2	3	184	185	5	0.31334
PIK3C2B	3	184	185	5	0.31334
TPTE	3	184	185	5	0.31334
MACC1	3	184	185	5	0.31334
SYCP2	3	184	185	5	0.31334
NBAS	3	184	185	5	0.31334
MMP16	3	184	185	5	0.31334
COL22A1	3	184	185	5	0.31334
PIK3C2G	3	184	185	5	0.31334
BCLAF1	3	184	185	5	0.31334
MAGEL2	3	184	185	5	0.31334
PEAK1	3	184	185	5	0.31334
ANKRD30B	3	184	185	5	0.31334
CTCF	3	184	185	5	0.31334
MECOM	3	184	185	5	0.31334
XIRP1	3	184	185	5	0.31334
ITGB4	3	184	185	5	0.31334
CTTNBP2	3	184	185	5	0.31334
SLITRK6	3	184	185	5	0.31334
SERPINB3	3	184	185	5	0.31334
HIST1H1C	3	184	185	5	0.31334
DPCR1	3	184	185	5	0.31334
SPHKAP	3	184	185	5	0.31334
FAM208A	3	184	185	5	0.31334
KIAA0556	3	184	185	5	0.31334
GRIA3	3	184	185	5	0.31334
TNRC6B	3	184	185	5	0.31334
OR5D18	3	184	185	5	0.31334
ANKRD24	3	184	185	5	0.31334
CCDC80	3	184	185	5	0.31334
FLG2	3	184	185	5	0.31334
EIF4G2	3	184	185	5	0.31334
ZFYVE26	3	184	185	5	0.31334
PCDH9	3	184	185	5	0.31334
ZNF521	3	184	185	5	0.31334
SCN1A	3	184	185	5	0.31334
CCSER1	3	184	185	5	0.31334
DHX9	3	184	185	5	0.31334
GTF3C1	3	184	185	5	0.31334
SLC25A12	3	184	185	5	0.31334
MPO	3	184	185	5	0.31334
ABR	3	184	185	5	0.31334
KCNA5	3	184	185	5	0.31334
CYP11B2	3	184	185	5	0.31334
PYGM	3	184	185	5	0.31334
PCDH10	3	184	185	5	0.31334
DZIP3	3	184	185	5	0.31334
ZNF831	3	184	185	5	0.31334
ATR	3	184	185	5	0.31334
ANKRD11	3	184	185	5	0.31334
NBEAL2	3	184	185	5	0.31334
CHD6	3	184	185	5	0.31334
CR2	3	184	185	5	0.31334
MYO3B	3	184	185	5	0.31334
FLNB	3	184	185	5	0.31334
TMEM132B	3	184	185	5	0.31334
DENND5B	3	184	185	5	0.31334
DCDC5	3	184	185	5	0.31334
FAM186A	3	184	185	5	0.31334
HTR7	3	184	185	5	0.31334
ATP10A	3	184	185	5	0.31334
PTPRZ1	3	184	185	5	0.31334
ZNF841	3	184	185	5	0.31334
PLA2R1	3	184	185	5	0.31334
FAM46D	3	184	185	5	0.31334
CEP350	3	184	185	5	0.31334
TACC2	2	184	185	5	0.315061
PCDHGA10	2	184	185	5	0.315061
SLC9C1	2	184	185	5	0.315061
CACNA1A	2	184	185	5	0.315061
IGF1R	2	184	185	5	0.315061
ST18	2	184	185	5	0.315061
KAT6B	2	184	185	5	0.315061
VPS13A	2	184	185	5	0.315061
MDC1	2	184	185	5	0.315061
TMPRSS7	2	184	185	5	0.315061
SDK2	2	184	185	5	0.315061
UBR2	2	184	185	5	0.315061
ANK1	2	184	185	5	0.315061
RGS12	2	184	185	5	0.315061
PTPN22	2	184	185	5	0.315061
MCM3AP	2	184	185	5	0.315061
PDE1C	2	184	185	5	0.315061
LRP12	2	184	185	5	0.315061
TRPM6	2	184	185	5	0.315061
CCT3	2	184	185	5	0.315061
COL15A1	2	184	185	5	0.315061
CD163L1	2	184	185	5	0.315061
SASH1	2	184	185	5	0.315061
CACNA2D4	2	184	185	5	0.315061
ITGA10	2	184	185	5	0.315061
ECE2	2	184	185	5	0.315061
PRDM16	2	184	185	5	0.315061
PCNT	2	184	185	5	0.315061
PLA2G4A	2	184	185	5	0.315061
KIF1B	2	184	185	5	0.315061
KIAA1407	2	184	185	5	0.315061
LAMA5	2	184	185	5	0.315061
ZFP64	2	184	185	5	0.315061
NID2	2	184	185	5	0.315061
FGA	2	184	185	5	0.315061
KCNH1	2	184	185	5	0.315061
ANKRD26	2	184	185	5	0.315061
ULK2	2	184	185	5	0.315061
PTEN	2	184	185	5	0.315061
LAMA2	2	184	185	5	0.315061
RXRA	2	184	185	5	0.315061
IMPG1	2	184	185	5	0.315061
DIDO1	2	184	185	5	0.315061
NOS2	2	184	185	5	0.315061
VWA3B	2	184	185	5	0.315061
DSE	2	184	185	5	0.315061
SLC26A4	2	184	185	5	0.315061
FN1	2	184	185	5	0.315061
ANKHD1	2	184	185	5	0.315061
TDRD5	2	184	185	5	0.315061
RANBP17	2	184	185	5	0.315061
TLE4	2	184	185	5	0.315061
IL12A	2	184	185	5	0.315061
DOCK1	2	184	185	5	0.315061
NPC1L1	2	184	185	5	0.315061
KCNK10	2	184	185	5	0.315061
CNTNAP5	2	184	185	5	0.315061
HSPA1L	2	184	185	5	0.315061
DGKG	2	184	185	5	0.315061
CHD4	2	184	185	5	0.315061
PCDHA7	2	184	185	5	0.315061
PTPRT	2	184	185	5	0.315061
BRCA2	2	184	185	5	0.315061
CLCN1	2	184	185	5	0.315061
BPTF	2	184	185	5	0.315061
CPS1	2	184	185	5	0.315061
TENM4	2	184	185	5	0.315061
SLC4A10	2	184	185	5	0.315061
ABCB5	2	184	185	5	0.315061
HECTD4	2	184	185	5	0.315061
NF1	2	184	185	5	0.315061
NCOR2	2	184	185	5	0.315061
IL21R	2	184	185	5	0.315061
CR1	2	184	185	5	0.315061
ZNF318	2	184	185	5	0.315061
MLL5	2	184	185	5	0.315061
HRNR	2	184	185	5	0.315061
LAMC1	2	184	185	5	0.315061
NRXN1	2	184	185	5	0.315061
DNAH3	2	184	185	5	0.315061
NLRP5	2	184	185	5	0.315061
PLCB1	2	184	185	5	0.315061
RPS6KA3	2	184	185	5	0.315061
ZFHX3	2	184	185	5	0.315061
CILP2	2	184	185	5	0.315061
C6orf165	2	184	185	5	0.315061
SGCZ	2	184	185	5	0.315061
ADCY8	2	184	185	5	0.315061
DAO	2	184	185	5	0.315061
PTPRB	2	184	185	5	0.315061
ZNF845	2	184	185	5	0.315061
TP53BP2	2	184	185	5	0.315061
LNPEP	4	184	185	4	0.0608132
MKI67	4	184	185	4	0.0608132
SPAG6	4	184	185	4	0.0608132
SLC12A1	4	184	185	4	0.0608132
PTCHD2	4	184	185	4	0.0608132
DHX57	4	184	185	4	0.0608132
DENND3	4	184	185	4	0.0608132
LDOC1L	4	184	185	4	0.0608132
SLC1A3	4	184	185	4	0.0608132
PCDHA6	4	184	185	4	0.0608132
PADI4	4	184	185	4	0.0608132
BOD1L1	4	184	185	4	0.0608132
PCDHGC5	4	184	185	4	0.0608132
EGFR	4	184	185	4	0.0608132
CACNA1C	4	184	185	4	0.0608132
PSG11	4	184	185	4	0.0608132
BAI1	4	184	185	4	0.0608132
KIF26A	4	184	185	4	0.0608132
NOD2	4	184	185	4	0.0608132
PARD3	4	184	185	4	0.0608132
NOX4	0	184	185	4	0.0621571
LGSN	0	184	185	4	0.0621571
SLC8A1	0	184	185	4	0.0621571
ZNF470	0	184	185	4	0.0621571
KIF4B	0	184	185	4	0.0621571
WDR96	0	184	185	4	0.0621571
ADAM17	0	184	185	4	0.0621571
SCN9A	0	184	185	4	0.0621571
SZT2	0	184	185	4	0.0621571
ITIH5	0	184	185	4	0.0621571
ZNF488	0	184	185	4	0.0621571
MSLN	0	184	185	4	0.0621571
GMIP	0	184	185	4	0.0621571
FMN1	0	184	185	4	0.0621571
AUTS2	0	184	185	4	0.0621571
CCR7	0	184	185	4	0.0621571
ITGAV	0	184	185	4	0.0621571
LCE1E	0	184	185	4	0.0621571
FOCAD	0	184	185	4	0.0621571
ACAD11	0	184	185	4	0.0621571
MTOR	0	184	185	4	0.0621571
PPP2R5B	0	184	185	4	0.0621571
RIMS2	0	184	185	4	0.0621571
MED14	0	184	185	4	0.0621571
TRRAP	3	184	185	4	0.248628
ZNF835	3	184	185	4	0.248628
NEK11	3	184	185	4	0.248628
USP34	3	184	185	4	0.248628
ASXL3	3	184	185	4	0.248628
TCHH	3	184	185	4	0.248628
PDS5A	3	184	185	4	0.248628
TRERF1	3	184	185	4	0.248628
GFM2	3	184	185	4	0.248628
MAP2	3	184	185	4	0.248628
FGGY	3	184	185	4	0.248628
CNKSR2	3	184	185	4	0.248628
NES	3	184	185	4	0.248628
SORCS1	3	184	185	4	0.248628
PRSS16	3	184	185	4	0.248628
ZNF462	3	184	185	4	0.248628
ADAMTS7	3	184	185	4	0.248628
ABCC3	3	184	185	4	0.248628
CLCA2	3	184	185	4	0.248628
KIAA1217	3	184	185	4	0.248628
TNN	3	184	185	4	0.248628
ARID5B	3	184	185	4	0.248628
LHCGR	3	184	185	4	0.248628
MYH11	3	184	185	4	0.248628
NOTCH2	3	184	185	4	0.248628
PRKD2	3	184	185	4	0.248628
DENND4A	3	184	185	4	0.248628
KIAA1614	3	184	185	4	0.248628
DDX50	3	184	185	4	0.248628
PCDH11X	3	184	185	4	0.248628
CNTRL	3	184	185	4	0.248628
UMODL1	3	184	185	4	0.248628
IGDCC3	3	184	185	4	0.248628
TRPC6	3	184	185	4	0.248628
CDH11	3	184	185	4	0.248628
AASDH	3	184	185	4	0.248628
EPHA10	3	184	185	4	0.248628
PC	3	184	185	4	0.248628
VAV3	3	184	185	4	0.248628
OLFML2A	3	184	185	4	0.248628
RGAG1	3	184	185	4	0.248628
TRHR	3	184	185	4	0.248628
EMILIN2	3	184	185	4	0.248628
OR8H2	3	184	185	4	0.248628
KLHL33	3	184	185	4	0.248628
TNK2	3	184	185	4	0.248628
GPR84	3	184	185	4	0.248628
FARP1	3	184	185	4	0.248628
PCBP3	3	184	185	4	0.248628
PTPRN2	3	184	185	4	0.248628
MYOM2	3	184	185	4	0.248628
UTP20	3	184	185	4	0.248628
HIPK2	3	184	185	4	0.248628
MUC6	3	184	185	4	0.248628
MYH1	3	184	185	4	0.248628
FGR	3	184	185	4	0.248628
HIBCH	3	184	185	4	0.248628
ESPNL	3	184	185	4	0.248628
ZNF20	3	184	185	4	0.248628
CHPF	3	184	185	4	0.248628
PITPNM2	3	184	185	4	0.248628
MAT1A	3	184	185	4	0.248628
IDH2	3	184	185	4	0.248628
MLH3	3	184	185	4	0.248628
CEP290	3	184	185	4	0.248628
MLXIPL	3	184	185	4	0.248628
OR51I1	3	184	185	4	0.248628
ACOT12	3	184	185	4	0.248628
TMEM132E	3	184	185	4	0.248628
IL12RB2	3	184	185	4	0.248628
MYO7B	3	184	185	4	0.248628
AQR	3	184	185	4	0.248628
DPP6	3	184	185	4	0.248628
HIPK3	3	184	185	4	0.248628
ZNF365	3	184	185	4	0.248628
ITGA11	3	184	185	4	0.248628
TNPO1	3	184	185	4	0.248628
DHX16	3	184	185	4	0.248628
PCDHB10	3	184	185	4	0.248628
A1BG	3	184	185	4	0.248628
GADL1	3	184	185	4	0.248628
GRM3	3	184	185	4	0.248628
CDKN1A	3	184	185	4	0.248628
GJA8	3	184	185	4	0.248628
SYT16	3	184	185	4	0.248628
ABCC4	3	184	185	4	0.248628
GAS2L2	3	184	185	4	0.248628
VWA5B2	3	184	185	4	0.248628
OR8K1	3	184	185	4	0.248628
LAMB4	3	184	185	4	0.248628
SOS1	3	184	185	4	0.248628
KIAA1522	3	184	185	4	0.248628
CGNL1	3	184	185	4	0.248628
PHKB	3	184	185	4	0.248628
POLG	3	184	185	4	0.248628
NOL4	3	184	185	4	0.248628
RAPGEF2	3	184	185	4	0.248628
EPHA6	3	184	185	4	0.248628
FBF1	3	184	185	4	0.248628
HDLBP	3	184	185	4	0.248628
MTMR7	3	184	185	4	0.248628
SLC30A1	3	184	185	4	0.248628
WBSCR17	3	184	185	4	0.248628
B4GALNT3	3	184	185	4	0.248628
HEPACAM2	3	184	185	4	0.248628
C19orf21	3	184	185	4	0.248628
TERF1	3	184	185	4	0.248628
UTRN	3	184	185	4	0.248628
ADAMTS19	3	184	185	4	0.248628
ZDBF2	3	184	185	4	0.248628
DOK7	3	184	185	4	0.248628
PIKFYVE	3	184	185	4	0.248628
SENP2	3	184	185	4	0.248628
PABPC4L	3	184	185	4	0.248628
MUSK	3	184	185	4	0.248628
TMEM132C	3	184	185	4	0.248628
ANO9	1	184	185	4	0.251361
SUPT6H	1	184	185	4	0.251361
PCDHB1	1	184	185	4	0.251361
CHRNA4	1	184	185	4	0.251361
CHD2	1	184	185	4	0.251361
OR51G1	1	184	185	4	0.251361
GPR63	1	184	185	4	0.251361
FLNA	1	184	185	4	0.251361
CFH	1	184	185	4	0.251361
ZNF98	1	184	185	4	0.251361
MYCBP2	1	184	185	4	0.251361
ERBB4	1	184	185	4	0.251361
COL9A1	1	184	185	4	0.251361
FSTL5	1	184	185	4	0.251361
CCDC13	1	184	185	4	0.251361
C2orf71	1	184	185	4	0.251361
EVX2	1	184	185	4	0.251361
YTHDC2	1	184	185	4	0.251361
NFATC4	1	184	185	4	0.251361
NPY5R	1	184	185	4	0.251361
COL5A1	1	184	185	4	0.251361
MIA3	1	184	185	4	0.251361
VWA3A	1	184	185	4	0.251361
POTEH	1	184	185	4	0.251361
P2RY1	1	184	185	4	0.251361
SND1	1	184	185	4	0.251361
LRRC4C	1	184	185	4	0.251361
TRPM1	1	184	185	4	0.251361
ARHGAP39	1	184	185	4	0.251361
TNC	1	184	185	4	0.251361
SLC7A13	1	184	185	4	0.251361
KSR2	1	184	185	4	0.251361
IL18RAP	1	184	185	4	0.251361
HIVEP2	1	184	185	4	0.251361
FOXS1	1	184	185	4	0.251361
GREB1	1	184	185	4	0.251361
DMXL1	1	184	185	4	0.251361
HUNK	1	184	185	4	0.251361
MBD1	1	184	185	4	0.251361
MYOCD	1	184	185	4	0.251361
COLGALT2	1	184	185	4	0.251361
RAB18	1	184	185	4	0.251361
NOX3	1	184	185	4	0.251361
PPP1R3A	1	184	185	4	0.251361
RAI14	1	184	185	4	0.251361
USP24	1	184	185	4	0.251361
SPTAN1	1	184	185	4	0.251361
SLC6A3	1	184	185	4	0.251361
KCNU1	1	184	185	4	0.251361
LRIG2	1	184	185	4	0.251361
OAS2	1	184	185	4	0.251361
KIAA0317	1	184	185	4	0.251361
STXBP5L	1	184	185	4	0.251361
NUP93	1	184	185	4	0.251361
MRC2	1	184	185	4	0.251361
PDZRN4	1	184	185	4	0.251361
PTPN14	1	184	185	4	0.251361
NOTCH4	1	184	185	4	0.251361
PHACTR3	1	184	185	4	0.251361
ASAP2	1	184	185	4	0.251361
ZNF28	1	184	185	4	0.251361
GRM8	1	184	185	4	0.251361
NHSL1	1	184	185	4	0.251361
TIAM2	1	184	185	4	0.251361
ZNF99	1	184	185	4	0.251361
FAM160A1	1	184	185	4	0.251361
GPR124	1	184	185	4	0.251361
SLC22A8	1	184	185	4	0.251361
POMT2	1	184	185	4	0.251361
ATAD2B	1	184	185	4	0.251361
RASA1	1	184	185	4	0.251361
TMF1	1	184	185	4	0.251361
GLG1	1	184	185	4	0.251361
RBL2	1	184	185	4	0.251361
TUSC3	1	184	185	4	0.251361
ABCB1	1	184	185	4	0.251361
CNOT1	1	184	185	4	0.251361
ADAM18	1	184	185	4	0.251361
SREBF1	1	184	185	4	0.251361
SI	1	184	185	4	0.251361
ATP2B2	1	184	185	4	0.251361
EPHB3	1	184	185	4	0.251361
ARHGAP33	1	184	185	4	0.251361
SRRM5	1	184	185	4	0.251361
RFX7	1	184	185	4	0.251361
IQUB	1	184	185	4	0.251361
ZNFX1	1	184	185	4	0.251361
DDX60L	1	184	185	4	0.251361
IGFN1	1	184	185	4	0.251361
FMN2	1	184	185	4	0.251361
RTL1	1	184	185	4	0.251361
AGBL1	1	184	185	4	0.251361
FBLN2	1	184	185	4	0.251361
ACAT2	1	184	185	4	0.251361
PCDHA13	1	184	185	4	0.251361
RAPGEF1	1	184	185	4	0.251361
TTC3	1	184	185	4	0.251361
ABCC9	1	184	185	4	0.251361
DLEC1	1	184	185	4	0.251361
SMC5	1	184	185	4	0.251361
OR2J3	1	184	185	4	0.251361
EIF4E1B	1	184	185	4	0.251361
LRFN2	1	184	185	4	0.251361
CASR	1	184	185	4	0.251361
MYO5A	1	184	185	4	0.251361
DTNA	1	184	185	4	0.251361
SH3TC2	1	184	185	4	0.251361
DTX3	1	184	185	4	0.251361
MAPK7	1	184	185	4	0.251361
TYW1	1	184	185	4	0.251361
PIGQ	1	184	185	4	0.251361
COPA	1	184	185	4	0.251361
ZNF790	1	184	185	4	0.251361
SYT10	1	184	185	4	0.251361
PPIP5K2	1	184	185	4	0.251361
DOCK11	1	184	185	4	0.251361
SLC9C2	1	184	185	4	0.251361
EIF4G3	1	184	185	4	0.251361
FAM5B	1	184	185	4	0.251361
DSP	1	184	185	4	0.251361
CD109	1	184	185	4	0.251361
GPR158	1	184	185	4	0.251361
ABCA7	1	184	185	4	0.251361
CAND2	1	184	185	4	0.251361
FAM208B	1	184	185	4	0.251361
SYNPO2	1	184	185	4	0.251361
ZBTB2	1	184	185	4	0.251361
SLC13A4	1	184	185	4	0.251361
ADAMTS14	1	184	185	4	0.251361
PRICKLE1	1	184	185	4	0.251361
MICAL1	1	184	185	4	0.251361
MCM10	1	184	185	4	0.251361
PBX1	1	184	185	4	0.251361
ODF2	1	184	185	4	0.251361
CCDC30	1	184	185	4	0.251361
ZEB2	1	184	185	4	0.251361
COL4A4	1	184	185	4	0.251361
L3MBTL3	1	184	185	4	0.251361
OPN4	1	184	185	4	0.251361
IL17RD	1	184	185	4	0.251361
C10orf12	1	184	185	4	0.251361
BRCA1	1	184	185	4	0.251361
LRRC69	1	184	185	4	0.251361
TEP1	1	184	185	4	0.251361
PKDREJ	2	184	185	4	0.377041
PCDHB2	2	184	185	4	0.377041
TRIM41	2	184	185	4	0.377041
COL4A2	2	184	185	4	0.377041
SEC31B	2	184	185	4	0.377041
OSBPL6	2	184	185	4	0.377041
SNAP91	2	184	185	4	0.377041
EGFLAM	2	184	185	4	0.377041
ZMYM4	2	184	185	4	0.377041
PKP4	2	184	185	4	0.377041
PTK2B	2	184	185	4	0.377041
GRAMD1B	2	184	185	4	0.377041
OR2M3	2	184	185	4	0.377041
GBP2	2	184	185	4	0.377041
NACAD	2	184	185	4	0.377041
AFF1	2	184	185	4	0.377041
ATP10B	2	184	185	4	0.377041
ZNF777	2	184	185	4	0.377041
NCAM1	2	184	185	4	0.377041
SOCS6	2	184	185	4	0.377041
THEMIS	2	184	185	4	0.377041
EBF1	2	184	185	4	0.377041
NUP188	2	184	185	4	0.377041
INSR	2	184	185	4	0.377041
BRD4	2	184	185	4	0.377041
PCDHGA5	2	184	185	4	0.377041
RAB3GAP2	2	184	185	4	0.377041
ZNF385D	2	184	185	4	0.377041
GRIA1	2	184	185	4	0.377041
SGSM1	2	184	185	4	0.377041
POSTN	2	184	185	4	0.377041
PLEKHG1	2	184	185	4	0.377041
TRPM2	2	184	185	4	0.377041
NEO1	2	184	185	4	0.377041
KCNK9	2	184	185	4	0.377041
MYO15A	2	184	185	4	0.377041
KRAS	2	184	185	4	0.377041
SLC18A2	2	184	185	4	0.377041
MERTK	2	184	185	4	0.377041
CSPG4	2	184	185	4	0.377041
MED13	2	184	185	4	0.377041
CHRM2	2	184	185	4	0.377041
ATG2B	2	184	185	4	0.377041
ATP4A	2	184	185	4	0.377041
FOXK1	2	184	185	4	0.377041
HKDC1	2	184	185	4	0.377041
JAK2	2	184	185	4	0.377041
42615	2	184	185	4	0.377041
AMPH	2	184	185	4	0.377041
TMC7	2	184	185	4	0.377041
FAM83H	2	184	185	4	0.377041
GH2	2	184	185	4	0.377041
NCOA2	2	184	185	4	0.377041
QRICH2	2	184	185	4	0.377041
SUPT20H	2	184	185	4	0.377041
RAG1	2	184	185	4	0.377041
NLRP1	2	184	185	4	0.377041
ZNF135	2	184	185	4	0.377041
PCDHA3	2	184	185	4	0.377041
FILIP1	2	184	185	4	0.377041
BRSK2	2	184	185	4	0.377041
KIAA1551	2	184	185	4	0.377041
PLA2G4C	2	184	185	4	0.377041
CPAMD8	2	184	185	4	0.377041
CCNB3	2	184	185	4	0.377041
ANK2	2	184	185	4	0.377041
SAMD9	2	184	185	4	0.377041
OR6K2	2	184	185	4	0.377041
OR10Z1	2	184	185	4	0.377041
KIAA1683	2	184	185	4	0.377041
CFTR	2	184	185	4	0.377041
ADCY5	2	184	185	4	0.377041
SPATA16	2	184	185	4	0.377041
EVC2	2	184	185	4	0.377041
FBLN1	2	184	185	4	0.377041
PCDHGB7	2	184	185	4	0.377041
MTMR4	2	184	185	4	0.377041
ARMC9	2	184	185	4	0.377041
PLEC	2	184	185	4	0.377041
MYO9A	2	184	185	4	0.377041
EHHADH	2	184	185	4	0.377041
FCRL1	2	184	185	4	0.377041
EXOC6B	2	184	185	4	0.377041
SCN2A	2	184	185	4	0.377041
SLC44A5	2	184	185	4	0.377041
ARHGEF17	2	184	185	4	0.377041
LMTK2	2	184	185	4	0.377041
NIPBL	2	184	185	4	0.377041
ARHGEF26	2	184	185	4	0.377041
ITGA9	2	184	185	4	0.377041
POU6F2	2	184	185	4	0.377041
ATXN7L1	2	184	185	4	0.377041
MEGF8	2	184	185	4	0.377041
T	2	184	185	4	0.377041
HHIP	2	184	185	4	0.377041
NUP153	2	184	185	4	0.377041
GABBR1	2	184	185	4	0.377041
ITSN1	2	184	185	4	0.377041
EIF4G1	2	184	185	4	0.377041
ASTL	2	184	185	4	0.377041
CROCC	2	184	185	4	0.377041
CPA6	2	184	185	4	0.377041
OR6Y1	2	184	185	4	0.377041
SRCAP	2	184	185	4	0.377041
ARHGAP22	2	184	185	4	0.377041
FER1L6	2	184	185	4	0.377041
ADNP2	2	184	185	4	0.377041
ATP12A	2	184	185	4	0.377041
ZNF716	2	184	185	4	0.377041
FANCA	2	184	185	4	0.377041
ARHGEF4	2	184	185	4	0.377041
ZCCHC2	2	184	185	4	0.377041
SGOL2	2	184	185	4	0.377041
FHAD1	2	184	185	4	0.377041
TEX14	2	184	185	4	0.377041
COL4A6	2	184	185	4	0.377041
GABRQ	2	184	185	4	0.377041
GABRA4	2	184	185	4	0.377041
DOT1L	2	184	185	4	0.377041
ADCY3	2	184	185	4	0.377041
ATAD2	2	184	185	4	0.377041
SESN2	2	184	185	4	0.377041
KRT27	2	184	185	4	0.377041
OR2T4	2	184	185	4	0.377041
LPHN1	2	184	185	4	0.377041
CABIN1	2	184	185	4	0.377041
USP31	2	184	185	4	0.377041
GAB1	2	184	185	4	0.377041
KIT	2	184	185	4	0.377041
SNTG2	2	184	185	4	0.377041
DACH2	2	184	185	4	0.377041
PCK1	2	184	185	4	0.377041
PPP1R13B	2	184	185	4	0.377041
HELZ	2	184	185	4	0.377041
HTR2C	2	184	185	4	0.377041
LRRTM3	2	184	185	4	0.377041
RADIL	2	184	185	4	0.377041
FBXL4	2	184	185	4	0.377041
CCR6	2	184	185	4	0.377041
ATP1A3	2	184	185	4	0.377041
CEP63	2	184	185	4	0.377041
PDGFRA	2	184	185	4	0.377041
DEPDC5	2	184	185	4	0.377041
GPATCH8	2	184	185	4	0.377041
PBRM1	2	184	185	4	0.377041
LTBP1	2	184	185	4	0.377041
ZNF334	2	184	185	4	0.377041
SPTBN2	2	184	185	4	0.377041
ZNF85	2	184	185	4	0.377041
DNM3	2	184	185	4	0.377041
LY75	2	184	185	4	0.377041
ARHGEF2	2	184	185	4	0.377041
OR10T2	2	184	185	4	0.377041
GABRG1	2	184	185	4	0.377041
PRKG1	2	184	185	4	0.377041
BIRC8	2	184	185	4	0.377041
SPECC1	2	184	185	4	0.377041
ZCCHC6	2	184	185	4	0.377041
APC	2	184	185	4	0.377041
HECW1	2	184	185	4	0.377041
AOX1	2	184	185	4	0.377041
PHLDB2	2	184	185	4	0.377041
TTBK1	2	184	185	4	0.377041
DNER	2	184	185	4	0.377041
SLCO6A1	2	184	185	4	0.377041
UBE2N	2	184	185	4	0.377041
MGA	2	184	185	4	0.377041
OR2M7	2	184	185	4	0.377041
CACNA2D1	2	184	185	4	0.377041
BCL11A	2	184	185	4	0.377041
USP40	2	184	185	4	0.377041
MME	2	184	185	4	0.377041
STAB2	2	184	185	4	0.377041
MAGI2	2	184	185	4	0.377041
TRIOBP	2	184	185	4	0.377041
KIAA1239	2	184	185	4	0.377041
LRFN5	2	184	185	4	0.377041
AP2B1	2	184	185	4	0.377041
OAS1	2	184	185	4	0.377041
AMER3	2	184	185	4	0.377041
RASSF10	2	184	185	4	0.377041
CDH15	2	184	185	4	0.377041
DLK2	2	184	185	4	0.377041
SP3	3	184	185	3	0.12297
CEP97	3	184	185	3	0.12297
OSR1	3	184	185	3	0.12297
EP300	3	184	185	3	0.12297
NEBL	3	184	185	3	0.12297
SLC45A4	3	184	185	3	0.12297
TYR	3	184	185	3	0.12297
SLC6A4	3	184	185	3	0.12297
CDK14	3	184	185	3	0.12297
ADAMTS2	3	184	185	3	0.12297
INTS8	3	184	185	3	0.12297
FNDC7	3	184	185	3	0.12297
TMC6	3	184	185	3	0.12297
ATP8B3	3	184	185	3	0.12297
DARC	3	184	185	3	0.12297
MAPKBP1	3	184	185	3	0.12297
DACT1	3	184	185	3	0.12297
NOL6	3	184	185	3	0.12297
RPE65	3	184	185	3	0.12297
ADAMTS10	3	184	185	3	0.12297
KPNA7	3	184	185	3	0.12297
ZBTB40	3	184	185	3	0.12297
ERCC6	3	184	185	3	0.12297
URM1	3	184	185	3	0.12297
STBD1	3	184	185	3	0.12297
SYT3	3	184	185	3	0.12297
CEP192	3	184	185	3	0.12297
GRIN1	3	184	185	3	0.12297
PRX	3	184	185	3	0.12297
AP1G1	3	184	185	3	0.12297
AHCTF1	3	184	185	3	0.12297
SLC15A2	3	184	185	3	0.12297
CALR	3	184	185	3	0.12297
PRMT10	3	184	185	3	0.12297
PAPPA	3	184	185	3	0.12297
GOLGB1	3	184	185	3	0.12297
TTC14	3	184	185	3	0.12297
WDR7	3	184	185	3	0.12297
MELK	3	184	185	3	0.12297
FURIN	3	184	185	3	0.12297
FLT4	3	184	185	3	0.12297
GTF3C3	3	184	185	3	0.12297
HSPA5	3	184	185	3	0.12297
CXorf22	3	184	185	3	0.12297
DOCK8	3	184	185	3	0.12297
NFASC	3	184	185	3	0.12297
XPO6	3	184	185	3	0.12297
PIK3CD	3	184	185	3	0.12297
MMP13	3	184	185	3	0.12297
NOP56	3	184	185	3	0.12297
EXOC3	3	184	185	3	0.12297
FMNL2	3	184	185	3	0.12297
PALM2-AKAP2	3	184	185	3	0.12297
ATP7B	3	184	185	3	0.12297
MLLT4	3	184	185	3	0.12297
SYT4	3	184	185	3	0.12297
IL1R1	3	184	185	3	0.12297
KLF15	3	184	185	3	0.12297
PAM	3	184	185	3	0.12297
FCGR3B	3	184	185	3	0.12297
WDFY3	3	184	185	3	0.12297
PEG10	3	184	185	3	0.12297
MYO1C	3	184	185	3	0.12297
THBS1	3	184	185	3	0.12297
TBX2	3	184	185	3	0.12297
LAMC2	3	184	185	3	0.12297
MARS	3	184	185	3	0.12297
KCNQ3	3	184	185	3	0.12297
EPHB2	3	184	185	3	0.12297
EHBP1L1	3	184	185	3	0.12297
IDH1	3	184	185	3	0.12297
COL4A5	3	184	185	3	0.12297
ITGAL	3	184	185	3	0.12297
MLXIP	3	184	185	3	0.12297
ATP2B4	3	184	185	3	0.12297
CCDC105	3	184	185	3	0.12297
PLA2G3	3	184	185	3	0.12297
PHF20	3	184	185	3	0.12297
AKAP3	3	184	185	3	0.12297
AHR	3	184	185	3	0.12297
KIF1A	3	184	185	3	0.12297
ILDR1	3	184	185	3	0.12297
JHDM1D	3	184	185	3	0.12297
CEP164	3	184	185	3	0.12297
CTC1	3	184	185	3	0.12297
UNC13A	3	184	185	3	0.12297
KLB	3	184	185	3	0.12297
KIAA1328	3	184	185	3	0.12297
SERPINE2	3	184	185	3	0.12297
SLC4A8	3	184	185	3	0.12297
CSNK1A1L	3	184	185	3	0.12297
CEP135	3	184	185	3	0.12297
SHC4	3	184	185	3	0.12297
C7orf43	3	184	185	3	0.12297
ADAMTSL4	3	184	185	3	0.12297
KDM4C	3	184	185	3	0.12297
PTPRH	3	184	185	3	0.12297
SIGLEC1	3	184	185	3	0.12297
PPP2R3A	3	184	185	3	0.12297
ZNF479	3	184	185	3	0.12297
LOC100132247	3	184	185	3	0.12297
ZNF486	3	184	185	3	0.12297
IQSEC3	3	184	185	3	0.12297
F10	3	184	185	3	0.12297
KCNA7	3	184	185	3	0.12297
TTI2	3	184	185	3	0.12297
CLEC1B	3	184	185	3	0.12297
TRIM58	3	184	185	3	0.12297
TTC13	3	184	185	3	0.12297
CASP8AP2	0	184	185	3	0.124997
ADRA1D	0	184	185	3	0.124997
ATP5B	0	184	185	3	0.124997
SIPA1L2	0	184	185	3	0.124997
ALG9	0	184	185	3	0.124997
SLC39A8	0	184	185	3	0.124997
LTBP2	0	184	185	3	0.124997
ISLR	0	184	185	3	0.124997
AIM1	0	184	185	3	0.124997
LCT	0	184	185	3	0.124997
CHST3	0	184	185	3	0.124997
TP63	0	184	185	3	0.124997
SRGAP3	0	184	185	3	0.124997
SIK1	0	184	185	3	0.124997
BCORL1	0	184	185	3	0.124997
ASAH2	0	184	185	3	0.124997
KRT8	0	184	185	3	0.124997
SIX2	0	184	185	3	0.124997
VEPH1	0	184	185	3	0.124997
TOP2B	0	184	185	3	0.124997
OVOL2	0	184	185	3	0.124997
PAK3	0	184	185	3	0.124997
XDH	0	184	185	3	0.124997
LCE1B	0	184	185	3	0.124997
DICER1	0	184	185	3	0.124997
LPHN3	0	184	185	3	0.124997
KRT86	0	184	185	3	0.124997
BIRC7	0	184	185	3	0.124997
MEI1	0	184	185	3	0.124997
KRTAP16-1	0	184	185	3	0.124997
MAP4K5	0	184	185	3	0.124997
TGFBRAP1	0	184	185	3	0.124997
ACCS	0	184	185	3	0.124997
KCTD8	0	184	185	3	0.124997
SENP6	0	184	185	3	0.124997
IPO7	0	184	185	3	0.124997
PRPF40A	0	184	185	3	0.124997
LILRA2	0	184	185	3	0.124997
RRBP1	0	184	185	3	0.124997
EIF3D	0	184	185	3	0.124997
FMO2	0	184	185	3	0.124997
MSH5	0	184	185	3	0.124997
ECT2L	0	184	185	3	0.124997
CTR9	0	184	185	3	0.124997
IQCA1	0	184	185	3	0.124997
NCOA7	0	184	185	3	0.124997
CCDC6	0	184	185	3	0.124997
NIN	0	184	185	3	0.124997
TGM3	0	184	185	3	0.124997
STAT4	0	184	185	3	0.124997
ASAP1	0	184	185	3	0.124997
ARAP2	0	184	185	3	0.124997
AKAP1	0	184	185	3	0.124997
OR9G9	0	184	185	3	0.124997
PPARGC1A	0	184	185	3	0.124997
PCF11	0	184	185	3	0.124997
LEPRE1	0	184	185	3	0.124997
EML5	0	184	185	3	0.124997
NLRP7	0	184	185	3	0.124997
LRRC4	0	184	185	3	0.124997
ARNT2	0	184	185	3	0.124997
CLCN7	0	184	185	3	0.124997
NXPE3	0	184	185	3	0.124997
SORCS2	0	184	185	3	0.124997
FBXO42	0	184	185	3	0.124997
KIAA1751	0	184	185	3	0.124997
UNKL	0	184	185	3	0.124997
SAMD9L	0	184	185	3	0.124997
ZNF567	0	184	185	3	0.124997
FGFR2	0	184	185	3	0.124997
POGZ	0	184	185	3	0.124997
SPRR4	0	184	185	3	0.124997
ITIH6	0	184	185	3	0.124997
MYBPC3	0	184	185	3	0.124997
TNFRSF4	0	184	185	3	0.124997
AADAC	0	184	185	3	0.124997
ARHGEF33	0	184	185	3	0.124997
JAK1	0	184	185	3	0.124997
LRRC45	0	184	185	3	0.124997
SLC26A11	0	184	185	3	0.124997
NFATC2	0	184	185	3	0.124997
RNF17	0	184	185	3	0.124997
SPAM1	0	184	185	3	0.124997
POLE	0	184	185	3	0.124997
PRKAA1	0	184	185	3	0.124997
CBX4	0	184	185	3	0.124997
PLEKHA5	0	184	185	3	0.124997
TCF7	0	184	185	3	0.124997
KLHL1	0	184	185	3	0.124997
TUBGCP6	0	184	185	3	0.124997
FBXL7	0	184	185	3	0.124997
TGM7	0	184	185	3	0.124997
LRRC3B	0	184	185	3	0.124997
ZC3H7A	0	184	185	3	0.124997
ALPK1	0	184	185	3	0.124997
SLC29A4	0	184	185	3	0.124997
IQGAP1	0	184	185	3	0.124997
LCMT2	0	184	185	3	0.124997
MYO1G	0	184	185	3	0.124997
RASGRF2	0	184	185	3	0.124997
MYO1E	0	184	185	3	0.124997
ZNF577	0	184	185	3	0.124997
ENGASE	0	184	185	3	0.124997
IL12RB1	0	184	185	3	0.124997
SCN11A	0	184	185	3	0.124997
GREB1L	0	184	185	3	0.124997
GUF1	0	184	185	3	0.124997
CYLC2	0	184	185	3	0.124997
AMPD1	0	184	185	3	0.124997
OR7A10	0	184	185	3	0.124997
DCLK1	0	184	185	3	0.124997
DTNB	0	184	185	3	0.124997
ATRNL1	0	184	185	3	0.124997
SAMD15	0	184	185	3	0.124997
GNAL	0	184	185	3	0.124997
LIPI	0	184	185	3	0.124997
PCDHB8	0	184	185	3	0.124997
PARD3B	0	184	185	3	0.124997
GLP2R	0	184	185	3	0.124997
WNK2	0	184	185	3	0.124997
OR51G2	0	184	185	3	0.124997
USP25	0	184	185	3	0.124997
PLEKHA4	0	184	185	3	0.124997
ERC1	0	184	185	3	0.124997
FIGN	0	184	185	3	0.124997
SETX	0	184	185	3	0.124997
KIAA0100	0	184	185	3	0.124997
ZNF677	0	184	185	3	0.124997
ESR1	0	184	185	3	0.124997
NAALAD2	0	184	185	3	0.124997
PGR	0	184	185	3	0.124997
SEMA6A	0	184	185	3	0.124997
FRG1	0	184	185	3	0.124997
ZNF827	0	184	185	3	0.124997
IRF2	0	184	185	3	0.124997
HFM1	0	184	185	3	0.124997
ADRB2	0	184	185	3	0.124997
RFTN2	0	184	185	3	0.124997
TLL1	0	184	185	3	0.124997
HHAT	0	184	185	3	0.124997
KIF21B	0	184	185	3	0.124997
PROM1	0	184	185	3	0.124997
ZNF347	0	184	185	3	0.124997
KRT35	0	184	185	3	0.124997
OTOF	0	184	185	3	0.124997
CDH26	0	184	185	3	0.124997
ZC3H12D	0	184	185	3	0.124997
JAG2	0	184	185	3	0.124997
BRPF1	0	184	185	3	0.124997
COBL	0	184	185	3	0.124997
MTIF2	0	184	185	3	0.124997
ZFP28	0	184	185	3	0.124997
ADAMTS8	0	184	185	3	0.124997
TUBA3C	0	184	185	3	0.124997
DEFB113	0	184	185	3	0.124997
DDX46	0	184	185	3	0.124997
LMO7	0	184	185	3	0.124997
RCN2	0	184	185	3	0.124997
NUP210L	0	184	185	3	0.124997
FIG4	0	184	185	3	0.124997
SF1	0	184	185	3	0.124997
WDR52	0	184	185	3	0.124997
GNL2	0	184	185	3	0.124997
TECTA	0	184	185	3	0.124997
OR51D1	0	184	185	3	0.124997
CYFIP2	0	184	185	3	0.124997
SLC16A12	0	184	185	3	0.124997
USP47	0	184	185	3	0.124997
PLEKHG4B	0	184	185	3	0.124997
CHD8	2	184	185	3	0.374992
STAC	2	184	185	3	0.374992
PIK3C2A	2	184	185	3	0.374992
STAG1	2	184	185	3	0.374992
OR9A4	2	184	185	3	0.374992
ANXA13	2	184	185	3	0.374992
KCNMA1	2	184	185	3	0.374992
TMEM71	2	184	185	3	0.374992
DCAF6	2	184	185	3	0.374992
GRIN3B	2	184	185	3	0.374992
KRT34	2	184	185	3	0.374992
NHS	2	184	185	3	0.374992
KRT1	2	184	185	3	0.374992
IRX4	2	184	185	3	0.374992
OR2G2	2	184	185	3	0.374992
NLRP8	2	184	185	3	0.374992
ANKRD32	2	184	185	3	0.374992
BDP1	2	184	185	3	0.374992
COBLL1	2	184	185	3	0.374992
ATXN1	2	184	185	3	0.374992
VPS39	2	184	185	3	0.374992
PAX3	2	184	185	3	0.374992
NCSTN	2	184	185	3	0.374992
SIGLEC9	2	184	185	3	0.374992
NLRP9	2	184	185	3	0.374992
SLFN13	2	184	185	3	0.374992
KPRP	2	184	185	3	0.374992
PCDHGA4	2	184	185	3	0.374992
GGA2	2	184	185	3	0.374992
CNTN2	2	184	185	3	0.374992
SYNJ1	2	184	185	3	0.374992
ADGB	2	184	185	3	0.374992
OR2W5	2	184	185	3	0.374992
DPYD	2	184	185	3	0.374992
KIF25	2	184	185	3	0.374992
NAA16	2	184	185	3	0.374992
ZNF471	2	184	185	3	0.374992
NIPAL4	2	184	185	3	0.374992
CRLF1	2	184	185	3	0.374992
PDE6A	2	184	185	3	0.374992
PHF8	2	184	185	3	0.374992
ZNF267	2	184	185	3	0.374992
SUFU	2	184	185	3	0.374992
RPS6KA2	2	184	185	3	0.374992
ZNF665	2	184	185	3	0.374992
RBM14	2	184	185	3	0.374992
KIR2DL3	2	184	185	3	0.374992
NOV	2	184	185	3	0.374992
ACOX2	2	184	185	3	0.374992
OR2B11	2	184	185	3	0.374992
VPS8	2	184	185	3	0.374992
WDR90	2	184	185	3	0.374992
SEMA6C	2	184	185	3	0.374992
SUV420H1	2	184	185	3	0.374992
PTGR1	2	184	185	3	0.374992
TACR3	2	184	185	3	0.374992
TSEN34	2	184	185	3	0.374992
KIF15	2	184	185	3	0.374992
COL3A1	2	184	185	3	0.374992
FAM160B1	2	184	185	3	0.374992
KIAA1549	2	184	185	3	0.374992
PYHIN1	2	184	185	3	0.374992
NFRKB	2	184	185	3	0.374992
HLA-E	2	184	185	3	0.374992
GEMIN5	2	184	185	3	0.374992
FERMT1	2	184	185	3	0.374992
PDPR	2	184	185	3	0.374992
LYST	2	184	185	3	0.374992
BAHCC1	2	184	185	3	0.374992
CARD10	2	184	185	3	0.374992
ITGA1	2	184	185	3	0.374992
IGSF9B	2	184	185	3	0.374992
KLHDC10	2	184	185	3	0.374992
CNOT10	2	184	185	3	0.374992
HMGCR	2	184	185	3	0.374992
CEP128	2	184	185	3	0.374992
CAPN11	2	184	185	3	0.374992
SIGLEC8	2	184	185	3	0.374992
GLE1	2	184	185	3	0.374992
MOCOS	2	184	185	3	0.374992
PPAP2C	2	184	185	3	0.374992
GPR112	2	184	185	3	0.374992
EDNRA	2	184	185	3	0.374992
TNS3	2	184	185	3	0.374992
ENTPD1	2	184	185	3	0.374992
ARHGAP23	2	184	185	3	0.374992
LRRC33	2	184	185	3	0.374992
ST5	2	184	185	3	0.374992
SMG6	2	184	185	3	0.374992
ANKRD30A	2	184	185	3	0.374992
CDK5RAP2	2	184	185	3	0.374992
FLOT1	2	184	185	3	0.374992
EMR3	2	184	185	3	0.374992
CHRNB3	2	184	185	3	0.374992
CACNA1D	2	184	185	3	0.374992
GABRA1	2	184	185	3	0.374992
GPX1	2	184	185	3	0.374992
OR2T1	2	184	185	3	0.374992
TRIP11	2	184	185	3	0.374992
GPAM	2	184	185	3	0.374992
EPPK1	2	184	185	3	0.374992
DFNA5	2	184	185	3	0.374992
FGFBP1	2	184	185	3	0.374992
LRIT1	2	184	185	3	0.374992
EPSTI1	2	184	185	3	0.374992
RBL1	2	184	185	3	0.374992
KDM6B	2	184	185	3	0.374992
ZIM3	2	184	185	3	0.374992
EPHA7	2	184	185	3	0.374992
ACACA	2	184	185	3	0.374992
KRT33B	2	184	185	3	0.374992
TIMP4	2	184	185	3	0.374992
OR4M1	2	184	185	3	0.374992
POU2F2	2	184	185	3	0.374992
NEK9	2	184	185	3	0.374992
CCT4	2	184	185	3	0.374992
NLRP12	2	184	185	3	0.374992
ADAMTS12	2	184	185	3	0.374992
NOX1	2	184	185	3	0.374992
SH3D19	2	184	185	3	0.374992
OR8J3	2	184	185	3	0.374992
FRMPD2	2	184	185	3	0.374992
HSPB2	2	184	185	3	0.374992
NEU2	2	184	185	3	0.374992
EML4	2	184	185	3	0.374992
APAF1	2	184	185	3	0.374992
MROH2B	2	184	185	3	0.374992
PHEX	2	184	185	3	0.374992
GPR133	2	184	185	3	0.374992
GAPVD1	2	184	185	3	0.374992
ZNF227	2	184	185	3	0.374992
CRY1	2	184	185	3	0.374992
HIPK1	2	184	185	3	0.374992
C1orf94	2	184	185	3	0.374992
MCM7	2	184	185	3	0.374992
PAX1	2	184	185	3	0.374992
EGF	2	184	185	3	0.374992
KIAA1324L	2	184	185	3	0.374992
ARHGEF10L	2	184	185	3	0.374992
TRIM66	2	184	185	3	0.374992
ZNF451	2	184	185	3	0.374992
TRAK2	2	184	185	3	0.374992
IRGC	2	184	185	3	0.374992
GALNT6	2	184	185	3	0.374992
C21orf59	2	184	185	3	0.374992
OGN	2	184	185	3	0.374992
PCM1	2	184	185	3	0.374992
GPR179	2	184	185	3	0.374992
CENPJ	2	184	185	3	0.374992
CYP27A1	2	184	185	3	0.374992
USP1	2	184	185	3	0.374992
AKAP11	2	184	185	3	0.374992
ARMCX1	2	184	185	3	0.374992
ZSCAN1	2	184	185	3	0.374992
HCN1	2	184	185	3	0.374992
AARS2	2	184	185	3	0.374992
ZSWIM2	2	184	185	3	0.374992
STXBP3	2	184	185	3	0.374992
SARS2	2	184	185	3	0.374992
TDRD6	2	184	185	3	0.374992
SMEK1	2	184	185	3	0.374992
CPT1B	2	184	185	3	0.374992
ATP13A5	2	184	185	3	0.374992
RCSD1	2	184	185	3	0.374992
DVL2	2	184	185	3	0.374992
NFE2L2	2	184	185	3	0.374992
MPEG1	2	184	185	3	0.374992
CCDC135	2	184	185	3	0.374992
SLC9A9	2	184	185	3	0.374992
CEP250	2	184	185	3	0.374992
ZNF256	2	184	185	3	0.374992
KBTBD12	2	184	185	3	0.374992
MYH14	2	184	185	3	0.374992
ZNF543	2	184	185	3	0.374992
HNRNPH1	2	184	185	3	0.374992
TLX3	2	184	185	3	0.374992
RPP40	2	184	185	3	0.374992
FNDC1	2	184	185	3	0.374992
NRXN3	2	184	185	3	0.374992
WT1	2	184	185	3	0.374992
RBFOX1	2	184	185	3	0.374992
PDX1	2	184	185	3	0.374992
RUNX1T1	2	184	185	3	0.374992
FGD5	2	184	185	3	0.374992
TBCK	2	184	185	3	0.374992
SPOP	2	184	185	3	0.374992
EPHA5	2	184	185	3	0.374992
AXIN2	2	184	185	3	0.374992
PROSER1	2	184	185	3	0.374992
GPR161	2	184	185	3	0.374992
BPIFC	2	184	185	3	0.374992
TRIP4	2	184	185	3	0.374992
RLIM	2	184	185	3	0.374992
NRAP	2	184	185	3	0.374992
POC5	2	184	185	3	0.374992
C10orf76	2	184	185	3	0.374992
KCNK2	2	184	185	3	0.374992
PPAP2A	2	184	185	3	0.374992
ARFGEF1	2	184	185	3	0.374992
HEATR1	2	184	185	3	0.374992
JAKMIP1	2	184	185	3	0.374992
NLRC4	2	184	185	3	0.374992
CADM2	2	184	185	3	0.374992
SLC9A6	2	184	185	3	0.374992
GPSM1	2	184	185	3	0.374992
YIF1B	2	184	185	3	0.374992
RNF135	2	184	185	3	0.374992
KDM3B	2	184	185	3	0.374992
MYT1	2	184	185	3	0.374992
SMOX	2	184	185	3	0.374992
PCDHGC3	2	184	185	3	0.374992
ZNF215	2	184	185	3	0.374992
CEP120	2	184	185	3	0.374992
ZNF708	2	184	185	3	0.374992
ABCC10	2	184	185	3	0.374992
DNAJB4	2	184	185	3	0.374992
OR8I2	2	184	185	3	0.374992
MCM2	2	184	185	3	0.374992
KTN1	2	184	185	3	0.374992
ZNF687	2	184	185	3	0.374992
HEG1	2	184	185	3	0.374992
UTP15	2	184	185	3	0.374992
IL1RAPL2	2	184	185	3	0.374992
PHF10	2	184	185	3	0.374992
ROS1	2	184	185	3	0.374992
PTCHD1	2	184	185	3	0.374992
KRT5	2	184	185	3	0.374992
IWS1	2	184	185	3	0.374992
PARP14	2	184	185	3	0.374992
INO80	2	184	185	3	0.374992
PLCE1	2	184	185	3	0.374992
NAAA	2	184	185	3	0.374992
ZNF331	2	184	185	3	0.374992
TKTL2	2	184	185	3	0.374992
PDE8A	2	184	185	3	0.374992
HELZ2	2	184	185	3	0.374992
CCDC178	2	184	185	3	0.374992
USP7	2	184	185	3	0.374992
TRPM4	2	184	185	3	0.374992
CDH23	2	184	185	3	0.374992
CDC20B	2	184	185	3	0.374992
SMTN	2	184	185	3	0.374992
ACAN	2	184	185	3	0.374992
ACPP	2	184	185	3	0.374992
GPR116	2	184	185	3	0.374992
IL31RA	2	184	185	3	0.374992
PHF3	2	184	185	3	0.374992
RASAL1	2	184	185	3	0.374992
GLUD2	2	184	185	3	0.374992
ALPK2	2	184	185	3	0.374992
FAM69B	2	184	185	3	0.374992
ARL5B	2	184	185	3	0.374992
NR4A2	2	184	185	3	0.374992
CHST2	2	184	185	3	0.374992
CLCA1	2	184	185	3	0.374992
GALNTL6	2	184	185	3	0.374992
MORC2	2	184	185	3	0.374992
PDE11A	2	184	185	3	0.374992
PTPN9	2	184	185	3	0.374992
SLC9A3	2	184	185	3	0.374992
NALCN	2	184	185	3	0.374992
NXF3	2	184	185	3	0.374992
BRWD3	2	184	185	3	0.374992
SORBS2	2	184	185	3	0.374992
FAM179A	2	184	185	3	0.374992
ZNF407	2	184	185	3	0.374992
AKNA	2	184	185	3	0.374992
GUCY2C	2	184	185	3	0.374992
CCR2	2	184	185	3	0.374992
CD300C	2	184	185	3	0.374992
PHF2	2	184	185	3	0.374992
PLXNB1	2	184	185	3	0.374992
COMMD3	2	184	185	3	0.374992
CDHR1	2	184	185	3	0.374992
ITGA8	2	184	185	3	0.374992
INF2	2	184	185	3	0.374992
USP6NL	2	184	185	3	0.374992
CHD1L	2	184	185	3	0.374992
ANKRD17	2	184	185	3	0.374992
SLC16A6	2	184	185	3	0.374992
ITGA3	2	184	185	3	0.374992
PSD4	2	184	185	3	0.374992
MAGEE2	2	184	185	3	0.374992
SYT5	2	184	185	3	0.374992
MAN2A2	2	184	185	3	0.374992
PEG3	2	184	185	3	0.374992
BAGE3	2	184	185	3	0.374992
USP4	2	184	185	3	0.374992
ZIC4	2	184	185	3	0.374992
KHDC3L	2	184	185	3	0.374992
ZNF71	2	184	185	3	0.374992
CRB2	2	184	185	3	0.374992
CAPS2	2	184	185	3	0.374992
PPP2R5D	2	184	185	3	0.374992
SNX15	2	184	185	3	0.374992
RBM20	2	184	185	3	0.374992
COL4A1	2	184	185	3	0.374992
SPTBN5	2	184	185	3	0.374992
GMPPA	2	184	185	3	0.374992
ZMIZ2	2	184	185	3	0.374992
GRM5	2	184	185	3	0.374992
MYH2	2	184	185	3	0.374992
DCAF12L2	2	184	185	3	0.374992
SLC27A6	2	184	185	3	0.374992
CNOT4	2	184	185	3	0.374992
ALS2CL	2	184	185	3	0.374992
POM121L2	2	184	185	3	0.374992
SCRIB	2	184	185	3	0.374992
DBC1	2	184	185	3	0.374992
OPLAH	2	184	185	3	0.374992
BTAF1	2	184	185	3	0.374992
TNR	2	184	185	3	0.374992
TELO2	2	184	185	3	0.374992
POU5F1B	2	184	185	3	0.374992
ATP5J2-PTCD1	2	184	185	3	0.374992
TDRD9	2	184	185	3	0.374992
PSTPIP1	2	184	185	3	0.374992
LRBA	2	184	185	3	0.374992
UBE2J1	2	184	185	3	0.374992
C2orf62	2	184	185	3	0.374992
PGLYRP4	2	184	185	3	0.374992
NBR1	2	184	185	3	0.374992
ROR1	2	184	185	3	0.374992
NPAS3	2	184	185	3	0.374992
ERCC3	2	184	185	3	0.374992
ZNF311	2	184	185	3	0.374992
ANKLE2	2	184	185	3	0.374992
GRAMD3	2	184	185	3	0.374992
NFAT5	2	184	185	3	0.374992
L1CAM	2	184	185	3	0.374992
DHTKD1	2	184	185	3	0.374992
SBNO1	2	184	185	3	0.374992
FLAD1	2	184	185	3	0.374992
SRRM2	2	184	185	3	0.374992
AXL	2	184	185	3	0.374992
AKAP8	2	184	185	3	0.374992
SOGA2	2	184	185	3	0.374992
FANCD2	2	184	185	3	0.374992
ZFYVE16	2	184	185	3	0.374992
SLC24A4	2	184	185	3	0.374992
C10orf71	2	184	185	3	0.374992
SF3B1	2	184	185	3	0.374992
PRF1	2	184	185	3	0.374992
GPRASP2	2	184	185	3	0.374992
SLC34A2	2	184	185	3	0.374992
EXOC4	2	184	185	3	0.374992
AUP1	2	184	185	3	0.374992
DHX29	2	184	185	3	0.374992
RAD51	2	184	185	3	0.374992
GAD1	2	184	185	3	0.374992
MGAM	2	184	185	3	0.374992
ZNF518B	2	184	185	3	0.374992
SPI1	2	184	185	3	0.374992
RCOR3	2	184	185	3	0.374992
MAP3K4	2	184	185	3	0.374992
ADAM8	2	184	185	3	0.374992
MON2	2	184	185	3	0.374992
EPG5	2	184	185	3	0.374992
CD1E	2	184	185	3	0.374992
GRM1	2	184	185	3	0.374992
ITPR2	2	184	185	3	0.374992
KIAA0586	2	184	185	3	0.374992
JAK3	2	184	185	3	0.374992
GRM7	2	184	185	3	0.374992
COL2A1	2	184	185	3	0.374992
KLHDC4	2	184	185	3	0.374992
ERAP2	2	184	185	3	0.374992
ITGA7	2	184	185	3	0.374992
PRR14L	2	184	185	3	0.374992
SLITRK3	2	184	185	3	0.374992
ANKRD18B	2	184	185	3	0.374992
TMEM151B	2	184	185	3	0.374992
FAM5C	2	184	185	3	0.374992
COL5A3	2	184	185	3	0.374992
CYTH1	2	184	185	3	0.374992
RNF123	2	184	185	3	0.374992
SHROOM3	2	184	185	3	0.374992
MMP19	2	184	185	3	0.374992
MAGEC1	2	184	185	3	0.374992
FZD10	2	184	185	3	0.374992
ATP8A1	2	184	185	3	0.374992
PTPN3	2	184	185	3	0.374992
TNS1	2	184	185	3	0.374992
TRIM28	2	184	185	3	0.374992
GPR142	2	184	185	3	0.374992
KCTD16	2	184	185	3	0.374992
ARHGEF28	2	184	185	3	0.374992
SLITRK2	2	184	185	3	0.374992
KRT79	2	184	185	3	0.374992
PCDH18	2	184	185	3	0.374992
OR51V1	2	184	185	3	0.374992
GABRA5	2	184	185	3	0.374992
AKT2	2	184	185	3	0.374992
PLB1	1	184	185	3	0.377041
MORC1	1	184	185	3	0.377041
WDR33	1	184	185	3	0.377041
FRK	1	184	185	3	0.377041
ZNF17	1	184	185	3	0.377041
VPS13B	1	184	185	3	0.377041
IKBKB	1	184	185	3	0.377041
ZBTB14	1	184	185	3	0.377041
JAM3	1	184	185	3	0.377041
SEMA7A	1	184	185	3	0.377041
GIN1	1	184	185	3	0.377041
BAI3	1	184	185	3	0.377041
C3orf20	1	184	185	3	0.377041
DENND2A	1	184	185	3	0.377041
ROCK1	1	184	185	3	0.377041
TRPM8	1	184	185	3	0.377041
TMEM260	1	184	185	3	0.377041
MAPK10	1	184	185	3	0.377041
CPB1	1	184	185	3	0.377041
TRAK1	1	184	185	3	0.377041
NLRX1	1	184	185	3	0.377041
TNFRSF11B	1	184	185	3	0.377041
TLN1	1	184	185	3	0.377041
TMEM200A	1	184	185	3	0.377041
TTLL4	1	184	185	3	0.377041
OR5B12	1	184	185	3	0.377041
OR2L13	1	184	185	3	0.377041
TRAPPC8	1	184	185	3	0.377041
NEU1	1	184	185	3	0.377041
CHD5	1	184	185	3	0.377041
DSPP	1	184	185	3	0.377041
KIAA1432	1	184	185	3	0.377041
CYP2A7	1	184	185	3	0.377041
FAM71B	1	184	185	3	0.377041
ADAM28	1	184	185	3	0.377041
TBL3	1	184	185	3	0.377041
KLHL32	1	184	185	3	0.377041
NUP98	1	184	185	3	0.377041
ALDH8A1	1	184	185	3	0.377041
ZSWIM1	1	184	185	3	0.377041
HOXA6	1	184	185	3	0.377041
FLNC	1	184	185	3	0.377041
CCDC129	1	184	185	3	0.377041
CD22	1	184	185	3	0.377041
ZNF534	1	184	185	3	0.377041
PACS2	1	184	185	3	0.377041
ZFP37	1	184	185	3	0.377041
RAI2	1	184	185	3	0.377041
RBMXL3	1	184	185	3	0.377041
BOC	1	184	185	3	0.377041
PUM1	1	184	185	3	0.377041
IGSF3	1	184	185	3	0.377041
TBC1D9B	1	184	185	3	0.377041
PJA2	1	184	185	3	0.377041
SLC36A2	1	184	185	3	0.377041
SEZ6L2	1	184	185	3	0.377041
FAM13C	1	184	185	3	0.377041
C7orf72	1	184	185	3	0.377041
SIGLEC12	1	184	185	3	0.377041
KIF13A	1	184	185	3	0.377041
SLC30A8	1	184	185	3	0.377041
SLITRK4	1	184	185	3	0.377041
ZNF507	1	184	185	3	0.377041
OR10G7	1	184	185	3	0.377041
SYNGAP1	1	184	185	3	0.377041
ZNF681	1	184	185	3	0.377041
HNRNPC	1	184	185	3	0.377041
JMJD1C	1	184	185	3	0.377041
PLD3	1	184	185	3	0.377041
FSIP1	1	184	185	3	0.377041
ERN2	1	184	185	3	0.377041
VIM	1	184	185	3	0.377041
NFE2L1	1	184	185	3	0.377041
DAB2IP	1	184	185	3	0.377041
SATB1	1	184	185	3	0.377041
POTEG	1	184	185	3	0.377041
MST1	1	184	185	3	0.377041
MYH6	1	184	185	3	0.377041
FLRT2	1	184	185	3	0.377041
ANXA7	1	184	185	3	0.377041
SNRK	1	184	185	3	0.377041
OPCML	1	184	185	3	0.377041
POLR2A	1	184	185	3	0.377041
CELSR3	1	184	185	3	0.377041
PARP11	1	184	185	3	0.377041
MYOD1	1	184	185	3	0.377041
PDHA2	1	184	185	3	0.377041
ELN	1	184	185	3	0.377041
IL10RA	1	184	185	3	0.377041
SPIRE1	1	184	185	3	0.377041
CDCA7	1	184	185	3	0.377041
UNC5D	1	184	185	3	0.377041
GPR149	1	184	185	3	0.377041
FAM129B	1	184	185	3	0.377041
CEP152	1	184	185	3	0.377041
NXF1	1	184	185	3	0.377041
NUP214	1	184	185	3	0.377041
ST6GALNAC1	1	184	185	3	0.377041
ZFR2	1	184	185	3	0.377041
PLXNA2	1	184	185	3	0.377041
USP20	1	184	185	3	0.377041
HIF3A	1	184	185	3	0.377041
MEP1A	1	184	185	3	0.377041
BCL11B	1	184	185	3	0.377041
FAM65C	1	184	185	3	0.377041
KRT72	1	184	185	3	0.377041
CORIN	1	184	185	3	0.377041
ABCA6	1	184	185	3	0.377041
PER2	1	184	185	3	0.377041
DEF6	1	184	185	3	0.377041
GAB4	1	184	185	3	0.377041
FNIP1	1	184	185	3	0.377041
PLCG1	1	184	185	3	0.377041
LAMB3	1	184	185	3	0.377041
TVP23C	1	184	185	3	0.377041
ADAMDEC1	1	184	185	3	0.377041
TARSL2	1	184	185	3	0.377041
C3orf30	1	184	185	3	0.377041
MEP1B	1	184	185	3	0.377041
EDC4	1	184	185	3	0.377041
ZNF454	1	184	185	3	0.377041
ZNF234	1	184	185	3	0.377041
RNF216	1	184	185	3	0.377041
TRIM46	1	184	185	3	0.377041
IFI16	1	184	185	3	0.377041
KANSL1	1	184	185	3	0.377041
RAPH1	1	184	185	3	0.377041
BMP5	1	184	185	3	0.377041
SALL4	1	184	185	3	0.377041
ZNF423	1	184	185	3	0.377041
IQGAP2	1	184	185	3	0.377041
RASGRF1	1	184	185	3	0.377041
COL14A1	1	184	185	3	0.377041
ASIC4	1	184	185	3	0.377041
SRRM4	1	184	185	3	0.377041
MAP1S	1	184	185	3	0.377041
DUOX1	1	184	185	3	0.377041
GRIK2	1	184	185	3	0.377041
C15orf55	1	184	185	3	0.377041
ZNF69	1	184	185	3	0.377041
MCTP2	1	184	185	3	0.377041
GRIN3A	1	184	185	3	0.377041
NUP133	1	184	185	3	0.377041
RASGRP1	1	184	185	3	0.377041
GABRA6	1	184	185	3	0.377041
PLA2G2F	1	184	185	3	0.377041
DUOX2	1	184	185	3	0.377041
KIAA1244	1	184	185	3	0.377041
IGSF1	1	184	185	3	0.377041
OR8H1	1	184	185	3	0.377041
MEX3B	1	184	185	3	0.377041
SCN4A	1	184	185	3	0.377041
OLFM3	1	184	185	3	0.377041
CHAT	1	184	185	3	0.377041
CNTN6	1	184	185	3	0.377041
RARG	1	184	185	3	0.377041
PMS1	1	184	185	3	0.377041
SLC6A17	1	184	185	3	0.377041
LARGE	1	184	185	3	0.377041
CELF3	1	184	185	3	0.377041
OR4Q3	1	184	185	3	0.377041
PTCH2	1	184	185	3	0.377041
GHITM	1	184	185	3	0.377041
PPP1R3F	1	184	185	3	0.377041
AP3B2	1	184	185	3	0.377041
WDHD1	1	184	185	3	0.377041
FAM227B	1	184	185	3	0.377041
ELAVL1	1	184	185	3	0.377041
TSPEAR	1	184	185	3	0.377041
SMARCA2	1	184	185	3	0.377041
POLR2B	1	184	185	3	0.377041
SLC39A12	1	184	185	3	0.377041
DDI1	1	184	185	3	0.377041
BAG6	1	184	185	3	0.377041
TRMT10B	1	184	185	3	0.377041
KCTD20	1	184	185	3	0.377041
MAN2A1	1	184	185	3	0.377041
HGS	1	184	185	3	0.377041
OR10H1	1	184	185	3	0.377041
HK2	1	184	185	3	0.377041
METTL1	1	184	185	3	0.377041
SLC6A15	1	184	185	3	0.377041
TOPBP1	1	184	185	3	0.377041
EPHA1	1	184	185	3	0.377041
LOC100653515	1	184	185	3	0.377041
GOSR2	1	184	185	3	0.377041
MMP15	1	184	185	3	0.377041
SLC24A2	1	184	185	3	0.377041
OR12D3	1	184	185	3	0.377041
PPP3CA	1	184	185	3	0.377041
RSPH6A	1	184	185	3	0.377041
KCNT2	1	184	185	3	0.377041
KRT38	1	184	185	3	0.377041
ANK3	1	184	185	3	0.377041
NCKAP5L	1	184	185	3	0.377041
APBB1	1	184	185	3	0.377041
MED23	1	184	185	3	0.377041
ABCD2	1	184	185	3	0.377041
FMO1	1	184	185	3	0.377041
ITGB5	1	184	185	3	0.377041
WDR27	1	184	185	3	0.377041
GBP5	1	184	185	3	0.377041
BTBD18	1	184	185	3	0.377041
SDHA	1	184	185	3	0.377041
IFT140	1	184	185	3	0.377041
CRIP3	1	184	185	3	0.377041
CHRM3	1	184	185	3	0.377041
IL2RB	1	184	185	3	0.377041
KCNA1	1	184	185	3	0.377041
TMPRSS11D	1	184	185	3	0.377041
NPSR1	1	184	185	3	0.377041
UBA6	1	184	185	3	0.377041
CEP89	1	184	185	3	0.377041
CCDC39	1	184	185	3	0.377041
C11orf57	1	184	185	3	0.377041
RBM48	1	184	185	3	0.377041
TRANK1	1	184	185	3	0.377041
GHDC	1	184	185	3	0.377041
DUSP6	1	184	185	3	0.377041
RCC1	1	184	185	3	0.377041
VWF	1	184	185	3	0.377041
SLC13A3	1	184	185	3	0.377041
RRP1B	1	184	185	3	0.377041
ZFP2	1	184	185	3	0.377041
ZNF280C	1	184	185	3	0.377041
EXO1	1	184	185	3	0.377041
LCP2	1	184	185	3	0.377041
CAMTA1	1	184	185	3	0.377041
METTL21C	1	184	185	3	0.377041
CLASP2	1	184	185	3	0.377041
SIAH1	1	184	185	3	0.377041
C6orf170	1	184	185	3	0.377041
ANKRD34A	1	184	185	3	0.377041
DYSF	1	184	185	3	0.377041
MYO7A	1	184	185	3	0.377041
F5	1	184	185	3	0.377041
VCL	1	184	185	3	0.377041
CUX1	1	184	185	3	0.377041
ARHGAP10	1	184	185	3	0.377041
KCNA3	1	184	185	3	0.377041
CDH8	1	184	185	3	0.377041
ERC2	1	184	185	3	0.377041
RFC1	1	184	185	3	0.377041
NET1	1	184	185	3	0.377041
GATA6	1	184	185	3	0.377041
TBX4	1	184	185	3	0.377041
GPR114	1	184	185	3	0.377041
RFX6	1	184	185	3	0.377041
NAV1	1	184	185	3	0.377041
SIRPB1	1	184	185	3	0.377041
OR10G8	1	184	185	3	0.377041
CLK4	1	184	185	3	0.377041
CPSF1	1	184	185	3	0.377041
VAT1L	1	184	185	3	0.377041
SCN5A	1	184	185	3	0.377041
ZNF366	1	184	185	3	0.377041
PCDHGA3	1	184	185	3	0.377041
GUCY1B3	1	184	185	3	0.377041
ASNS	1	184	185	3	0.377041
VAV1	1	184	185	3	0.377041
UBA1	1	184	185	3	0.377041
LOXL4	1	184	185	3	0.377041
DDX17	1	184	185	3	0.377041
ELL2	1	184	185	3	0.377041
BBS9	1	184	185	3	0.377041
KIAA1755	1	184	185	3	0.377041
ASXL2	1	184	185	3	0.377041
ZRANB3	1	184	185	3	0.377041
GNB5	1	184	185	3	0.377041
TANC2	1	184	185	3	0.377041
SOX30	1	184	185	3	0.377041
SYNE3	1	184	185	3	0.377041
[truncated: 7,764 more rows]
