# Supplementary material for: A human-specific switch of alternatively spliced AFMID isoforms contributes to TP53 mutations and tumor recurrence in hepatocellular carcinoma
Source: HighWire-hosted journal article supplement (doi:10.1101/gr.227181.117), 2018-02-15
Supplement: Supplemental_Table_S6.xlsx [file Supplemental_Table_S6.xlsx]

## Sheet: Table S6
Table S6. Enrichment results for non-silent and silent mutations
Gene Symbol	Number of mutated HCCs in High	Number of High	Number of Low	Number of mutated HCCs	Hypergeometric p-value
TTN	32	184	185	67	0.0999309
TP53	20	184	185	61	0.00155094
CTNNB1	27	184	185	51	0.107244
MUC16	21	184	185	45	0.113901
RYR2	13	184	185	29	0.131086
APOB	14	184	185	27	0.154531
OBSCN	13	184	185	27	0.155435
CSMD3	13	184	185	26	0.160723
ABCA13	11	184	185	25	0.136966
USH2A	7	184	185	23	0.0275577
FLG	8	184	185	22	0.0759442
PCLO	12	184	185	22	0.157147
CSMD1	12	184	185	21	0.141238
GPR98	10	184	185	21	0.173416
LRP1B	7	184	185	20	0.0734469
FAT3	12	184	185	20	0.119351
XIRP2	10	184	185	20	0.181154
DNAH6	10	184	185	19	0.180125
FREM2	6	184	185	18	0.0701682
ALB	7	184	185	18	0.123054
CACNA1E	7	184	185	18	0.123054
FBN2	7	184	185	18	0.123054
DMD	10	184	185	18	0.169199
ARID1A	6	184	185	17	0.0946329
SYNE2	6	184	185	17	0.0946329
SYNE1	9	184	185	17	0.189073
FAT2	9	184	185	17	0.189073
PCDH15	9	184	185	17	0.189073
FRAS1	6	184	185	16	0.123516
DNAH8	6	184	185	16	0.123516
MLL3	9	184	185	16	0.176451
HMCN1	7	184	185	16	0.178456
SPTA1	8	184	185	16	0.200763
RB1	11	184	185	15	0.0389151
RYR3	11	184	185	15	0.0389151
DNAH5	4	184	185	15	0.0404806
NBEA	5	184	185	15	0.0916018
DNAH7	5	184	185	15	0.0916018
DNAH10	8	184	185	15	0.199635
MUC4	8	184	185	15	0.199635
PKHD1L1	8	184	185	15	0.199635
VCAN	8	184	185	15	0.199635
BIRC6	8	184	185	15	0.199635
HERC2	8	184	185	15	0.199635
DNAH9	8	184	185	15	0.199635
MUC2	8	184	185	15	0.199635
UNC80	7	184	185	15	0.200763
FASN	10	184	185	14	0.0582235
NEB	4	184	185	14	0.0602197
PRKDC	6	184	185	14	0.186853
DYNC2H1	7	184	185	14	0.213546
RP1	7	184	185	14	0.213546
WDR87	3	184	185	13	0.0338409
DCHS2	8	184	185	13	0.15661
AHNAK2	8	184	185	13	0.15661
COL6A3	5	184	185	13	0.159265
EYS	5	184	185	13	0.159265
FBN1	7	184	185	13	0.212353
ZNF469	7	184	185	13	0.212353
KIF26B	7	184	185	13	0.212353
COL6A6	6	184	185	13	0.213546
MLL2	6	184	185	13	0.213546
HYDIN	6	184	185	13	0.213546
SDK1	6	184	185	13	0.213546
CUBN	6	184	185	13	0.213546
ZNF208	2	184	185	12	0.0153185
MYT1L	9	184	185	12	0.0510618
LRP2	9	184	185	12	0.0510618
PCDH7	8	184	185	12	0.118806
UBR4	8	184	185	12	0.118806
CHL1	8	184	185	12	0.118806
HTT	8	184	185	12	0.118806
DNAH17	4	184	185	12	0.121491
ABCA4	7	184	185	12	0.194385
MLL4	5	184	185	12	0.196569
LAMA1	5	184	185	12	0.196569
WDFY4	5	184	185	12	0.196569
SACS	6	184	185	12	0.22933
PTPRQ	6	184	185	12	0.22933
PREX2	6	184	185	12	0.22933
CCDC168	6	184	185	12	0.22933
CELSR2	6	184	185	12	0.22933
LRP1	6	184	185	12	0.22933
TRPA1	2	184	185	11	0.0259661
GLI2	8	184	185	11	0.0778982
ZNF536	3	184	185	11	0.0800987
SPEG	7	184	185	11	0.160197
ZAN	7	184	185	11	0.160197
UNC13C	7	184	185	11	0.160197
PTPN13	7	184	185	11	0.160197
UNC79	7	184	185	11	0.160197
DNAH1	7	184	185	11	0.160197
COL11A1	7	184	185	11	0.160197
RP1L1	7	184	185	11	0.160197
ANKRD12	4	184	185	11	0.162897
LRRIQ1	6	184	185	11	0.228056
DSCAM	6	184	185	11	0.228056
CUL9	6	184	185	11	0.228056
BAP1	6	184	185	11	0.228056
MYH7	6	184	185	11	0.228056
TENM2	6	184	185	11	0.228056
TPO	6	184	185	11	0.228056
SPTBN1	6	184	185	11	0.228056
ADAMTS20	5	184	185	11	0.22933
RYR1	5	184	185	11	0.22933
SEMA6D	5	184	185	11	0.22933
NOS1	5	184	185	11	0.22933
GCN1L1	5	184	185	11	0.22933
DST	5	184	185	11	0.22933
MRC2	5	184	185	11	0.22933
PKD1L1	5	184	185	11	0.22933
MDN1	5	184	185	11	0.22933
MYO3A	5	184	185	11	0.22933
TNXB	8	184	185	10	0.0416773
DOCK2	2	184	185	10	0.0430901
MACF1	7	184	185	10	0.114907
RELN	7	184	185	10	0.114907
ZFHX4	3	184	185	10	0.117489
EVPL	3	184	185	10	0.117489
ZNF804B	3	184	185	10	0.117489
KNDC1	3	184	185	10	0.117489
AXIN1	3	184	185	10	0.117489
CADPS	3	184	185	10	0.117489
MYO10	3	184	185	10	0.117489
STAB2	3	184	185	10	0.117489
KIAA1109	6	184	185	10	0.205606
AKAP13	6	184	185	10	0.205606
PLXNA4	6	184	185	10	0.205606
PDE4DIP	6	184	185	10	0.205606
DMBT1	6	184	185	10	0.205606
DNAH12	6	184	185	10	0.205606
C3	6	184	185	10	0.205606
ALMS1	6	184	185	10	0.205606
MYH15	4	184	185	10	0.207903
TDRD5	4	184	185	10	0.207903
PTPRB	4	184	185	10	0.207903
PHRF1	4	184	185	10	0.207903
ARID1B	4	184	185	10	0.207903
FBN3	4	184	185	10	0.207903
MUC5B	5	184	185	10	0.249484
PTPRM	5	184	185	10	0.249484
SVEP1	5	184	185	10	0.249484
KDR	5	184	185	10	0.249484
DNAH2	5	184	185	10	0.249484
ROBO2	5	184	185	10	0.249484
DYNC1H1	5	184	185	10	0.249484
IGF2R	8	184	185	9	0.0163085
SETD2	8	184	185	9	0.0163085
SLIT2	7	184	185	9	0.0678139
ZNF638	7	184	185	9	0.0678139
COL7A1	2	184	185	9	0.0697187
CACNA1B	2	184	185	9	0.0697187
NOTCH3	2	184	185	9	0.0697187
TEK	2	184	185	9	0.0697187
ADAMTSL1	2	184	185	9	0.0697187
AHNAK	2	184	185	9	0.0697187
FCGBP	6	184	185	9	0.162677
PLA2R1	6	184	185	9	0.162677
FREM1	6	184	185	9	0.162677
PLCB4	6	184	185	9	0.162677
KIF19	6	184	185	9	0.162677
THSD7A	6	184	185	9	0.162677
PCDH11Y	6	184	185	9	0.162677
COL6A5	6	184	185	9	0.162677
ROBO1	6	184	185	9	0.162677
WDR17	6	184	185	9	0.162677
ATP8A2	6	184	185	9	0.162677
STAB1	3	184	185	9	0.165404
ADAMTS18	3	184	185	9	0.165404
MAP1B	3	184	185	9	0.165404
LRRK2	3	184	185	9	0.165404
ASXL1	5	184	185	9	0.248105
ELTD1	5	184	185	9	0.248105
PXDNL	5	184	185	9	0.248105
ZFYVE26	5	184	185	9	0.248105
MYO18B	5	184	185	9	0.248105
NPC1L1	5	184	185	9	0.248105
GRIA4	5	184	185	9	0.248105
CSMD2	4	184	185	9	0.249484
FHOD3	4	184	185	9	0.249484
DCHS1	4	184	185	9	0.249484
SSPO	4	184	185	9	0.249484
CELSR1	4	184	185	9	0.249484
SPEN	4	184	185	9	0.249484
MGA	4	184	185	9	0.249484
EGFLAM	4	184	185	9	0.249484
NLGN4X	4	184	185	9	0.249484
DNHD1	4	184	185	9	0.249484
COL16A1	4	184	185	9	0.249484
RGPD4	4	184	185	9	0.249484
CHD7	4	184	185	9	0.249484
POLQ	4	184	185	9	0.249484
PRDM2	4	184	185	9	0.249484
CYLC1	1	184	185	8	0.0305628
TG	1	184	185	8	0.0305628
PKHD1	1	184	185	8	0.0305628
REV3L	1	184	185	8	0.0305628
GRIA2	6	184	185	8	0.10697
VPS13C	6	184	185	8	0.10697
SPTBN5	6	184	185	8	0.10697
NCOA6	6	184	185	8	0.10697
HNF1A	6	184	185	8	0.10697
SPTB	6	184	185	8	0.10697
CREBBP	6	184	185	8	0.10697
FAM47A	6	184	185	8	0.10697
KIAA0947	6	184	185	8	0.10697
HELZ2	6	184	185	8	0.10697
FANCM	6	184	185	8	0.10697
ADCY2	6	184	185	8	0.10697
MECOM	6	184	185	8	0.10697
KIF20B	2	184	185	8	0.10936
DUSP27	2	184	185	8	0.10936
KIAA1244	2	184	185	8	0.10936
TRIP12	2	184	185	8	0.10936
DSP	2	184	185	8	0.10936
HIVEP1	5	184	185	8	0.21872
ABCA12	5	184	185	8	0.21872
ACAN	5	184	185	8	0.21872
ATR	5	184	185	8	0.21872
OVCH1	5	184	185	8	0.21872
PCDHA6	5	184	185	8	0.21872
MXRA5	5	184	185	8	0.21872
IL6ST	5	184	185	8	0.21872
JARID2	5	184	185	8	0.21872
ASTN1	5	184	185	8	0.21872
HERC1	5	184	185	8	0.21872
TRPM3	5	184	185	8	0.21872
RIMS1	5	184	185	8	0.21872
SCN10A	5	184	185	8	0.21872
HDAC9	5	184	185	8	0.21872
RANBP2	5	184	185	8	0.21872
PRUNE2	5	184	185	8	0.21872
KCNB2	5	184	185	8	0.21872
CR2	5	184	185	8	0.21872
DOCK10	5	184	185	8	0.21872
OR5D18	5	184	185	8	0.21872
SEMA3A	5	184	185	8	0.21872
PC	5	184	185	8	0.21872
CDH9	3	184	185	8	0.221151
MUC17	3	184	185	8	0.221151
LRRK1	3	184	185	8	0.221151
COL12A1	3	184	185	8	0.221151
CR1	3	184	185	8	0.221151
SCN11A	3	184	185	8	0.221151
SMARCA4	3	184	185	8	0.221151
GRXCR1	3	184	185	8	0.221151
CCDC136	3	184	185	8	0.221151
ZNF831	3	184	185	8	0.221151
DNAH14	3	184	185	8	0.221151
GTF3C1	3	184	185	8	0.221151
VWA3A	3	184	185	8	0.221151
MYH1	3	184	185	8	0.221151
FER1L5	3	184	185	8	0.221151
ADCY8	3	184	185	8	0.221151
ATM	3	184	185	8	0.221151
TRPS1	3	184	185	8	0.221151
PSD2	3	184	185	8	0.221151
ANO4	3	184	185	8	0.221151
NRXN1	3	184	185	8	0.221151
ANKRD26	4	184	185	8	0.276438
ANKRD11	4	184	185	8	0.276438
MEGF8	4	184	185	8	0.276438
SEZ6L	4	184	185	8	0.276438
PXDN	4	184	185	8	0.276438
MGAM	4	184	185	8	0.276438
NAV3	4	184	185	8	0.276438
TNRC6A	4	184	185	8	0.276438
ADAMTS9	4	184	185	8	0.276438
PIK3CA	4	184	185	8	0.276438
LAMC1	4	184	185	8	0.276438
HECW2	4	184	185	8	0.276438
TACC2	4	184	185	8	0.276438
SCN1A	4	184	185	8	0.276438
TNRC18	4	184	185	8	0.276438
TSC2	4	184	185	8	0.276438
MLL	4	184	185	8	0.276438
COL4A4	4	184	185	8	0.276438
TTC40	4	184	185	8	0.276438
RNU6-71	4	184	185	8	0.276438
GLI3	4	184	185	8	0.276438
PREX1	4	184	185	8	0.276438
TRPM6	4	184	185	8	0.276438
ACACB	4	184	185	8	0.276438
SCAPER	4	184	185	8	0.276438
INADL	4	184	185	8	0.276438
NLGN1	4	184	185	8	0.276438
DSEL	0	184	185	7	0.00751612
RNF213	6	184	185	7	0.0526129
MYH11	6	184	185	7	0.0526129
USP19	6	184	185	7	0.0526129
OTOGL	6	184	185	7	0.0526129
SHANK2	6	184	185	7	0.0526129
PCDHAC2	6	184	185	7	0.0526129
GNAS	6	184	185	7	0.0526129
DHX16	6	184	185	7	0.0526129
MYO9B	1	184	185	7	0.0540825
MYOF	1	184	185	7	0.0540825
CDH18	1	184	185	7	0.0540825
SALL1	5	184	185	7	0.162247
C16orf96	5	184	185	7	0.162247
CEP350	5	184	185	7	0.162247
GPR84	5	184	185	7	0.162247
NBEAL2	5	184	185	7	0.162247
SLC12A1	5	184	185	7	0.162247
EPHA6	5	184	185	7	0.162247
LAMB4	5	184	185	7	0.162247
CADM1	5	184	185	7	0.162247
LRP4	5	184	185	7	0.162247
CAND1	5	184	185	7	0.162247
IRX1	5	184	185	7	0.162247
MYO3B	5	184	185	7	0.162247
SNTG2	5	184	185	7	0.162247
LAMA3	5	184	185	7	0.162247
BOD1L1	5	184	185	7	0.162247
NSD1	5	184	185	7	0.162247
KNTC1	5	184	185	7	0.162247
TNN	5	184	185	7	0.162247
CENPE	5	184	185	7	0.162247
IGF1R	2	184	185	7	0.164952
SORCS2	2	184	185	7	0.164952
ZNF578	2	184	185	7	0.164952
RIMS2	2	184	185	7	0.164952
DMXL2	2	184	185	7	0.164952
FAT4	2	184	185	7	0.164952
CILP2	2	184	185	7	0.164952
DNAH3	2	184	185	7	0.164952
CTNND2	2	184	185	7	0.164952
PCDHA7	2	184	185	7	0.164952
SDK2	2	184	185	7	0.164952
KAT6B	2	184	185	7	0.164952
PLCB1	2	184	185	7	0.164952
TMPRSS7	2	184	185	7	0.164952
KIAA2026	2	184	185	7	0.164952
PRICKLE2	2	184	185	7	0.164952
TEX15	2	184	185	7	0.164952
FN1	2	184	185	7	0.164952
ZNF91	2	184	185	7	0.164952
GPR158	2	184	185	7	0.164952
NOTCH4	2	184	185	7	0.164952
FAM5B	2	184	185	7	0.164952
TAF1	2	184	185	7	0.164952
DENND5B	4	184	185	7	0.274919
A2ML1	4	184	185	7	0.274919
FLT4	4	184	185	7	0.274919
DZIP3	4	184	185	7	0.274919
FANCD2	4	184	185	7	0.274919
NBAS	4	184	185	7	0.274919
ARID2	4	184	185	7	0.274919
NPAP1	4	184	185	7	0.274919
DSCAML1	4	184	185	7	0.274919
CACNA1C	4	184	185	7	0.274919
BMPER	4	184	185	7	0.274919
SPTBN2	4	184	185	7	0.274919
USP34	4	184	185	7	0.274919
CTTNBP2	4	184	185	7	0.274919
TENM4	4	184	185	7	0.274919
ZNF521	4	184	185	7	0.274919
CLSTN2	4	184	185	7	0.274919
NIPBL	4	184	185	7	0.274919
PHACTR3	4	184	185	7	0.274919
CRB1	4	184	185	7	0.274919
PIKFYVE	4	184	185	7	0.274919
LRFN5	4	184	185	7	0.274919
NF1	4	184	185	7	0.274919
GRIN2A	4	184	185	7	0.274919
BAZ2B	4	184	185	7	0.274919
USP48	4	184	185	7	0.274919
MYO6	4	184	185	7	0.274919
MYO18A	4	184	185	7	0.274919
BOC	4	184	185	7	0.274919
DIDO1	4	184	185	7	0.274919
MAP2	4	184	185	7	0.274919
COL15A1	4	184	185	7	0.274919
ABCA1	4	184	185	7	0.274919
PTPRZ1	4	184	185	7	0.274919
LYST	3	184	185	7	0.276438
FLG2	3	184	185	7	0.276438
PCDHB16	3	184	185	7	0.276438
NLRP5	3	184	185	7	0.276438
ITSN1	3	184	185	7	0.276438
DCC	3	184	185	7	0.276438
WDFY3	3	184	185	7	0.276438
MICAL3	3	184	185	7	0.276438
ABCB5	3	184	185	7	0.276438
KEAP1	3	184	185	7	0.276438
HSPA1L	3	184	185	7	0.276438
VWDE	3	184	185	7	0.276438
PTPRT	3	184	185	7	0.276438
ZNF845	3	184	185	7	0.276438
TSC1	3	184	185	7	0.276438
THSD7B	3	184	185	7	0.276438
ANK1	3	184	185	7	0.276438
FSIP2	3	184	185	7	0.276438
CARD11	3	184	185	7	0.276438
OPRM1	3	184	185	7	0.276438
USP40	3	184	185	7	0.276438
SLC9C1	3	184	185	7	0.276438
PCDHA8	3	184	185	7	0.276438
TNRC6B	3	184	185	7	0.276438
ATP9A	3	184	185	7	0.276438
RBMXL3	3	184	185	7	0.276438
SPAG17	3	184	185	7	0.276438
PDS5A	3	184	185	7	0.276438
LRP12	3	184	185	7	0.276438
ZFC3H1	3	184	185	7	0.276438
TDRD1	3	184	185	7	0.276438
COL5A2	3	184	185	7	0.276438
CNGA3	3	184	185	7	0.276438
TENM3	3	184	185	7	0.276438
PIWIL4	3	184	185	7	0.276438
SPHKAP	3	184	185	7	0.276438
CYP11B2	3	184	185	7	0.276438
CFTR	3	184	185	7	0.276438
CDH7	3	184	185	7	0.276438
SORCS3	3	184	185	7	0.276438
TTC28	3	184	185	7	0.276438
DPP10	3	184	185	7	0.276438
CDK5RAP2	3	184	185	7	0.276438
ITPR3	3	184	185	7	0.276438
NCOA3	6	184	185	6	0.0147478
KIAA1210	6	184	185	6	0.0147478
SCN3A	6	184	185	6	0.0147478
CHD9	6	184	185	6	0.0147478
PDCD11	0	184	185	6	0.0152422
GPHN	0	184	185	6	0.0152422
DDX46	0	184	185	6	0.0152422
EPHA3	0	184	185	6	0.0152422
BSN	0	184	185	6	0.0152422
MTOR	0	184	185	6	0.0152422
CDHR1	5	184	185	6	0.0914532
IGSF9B	5	184	185	6	0.0914532
TJP1	5	184	185	6	0.0914532
NOTCH2	5	184	185	6	0.0914532
MYOM2	5	184	185	6	0.0914532
PARD3	5	184	185	6	0.0914532
CNKSR2	5	184	185	6	0.0914532
ITGA7	5	184	185	6	0.0914532
CEP290	5	184	185	6	0.0914532
PCDHA5	5	184	185	6	0.0914532
ADAM29	5	184	185	6	0.0914532
KIAA1217	5	184	185	6	0.0914532
KLB	5	184	185	6	0.0914532
BAZ1A	5	184	185	6	0.0914532
PDE3A	5	184	185	6	0.0914532
CNTLN	1	184	185	6	0.0934855
KIF21B	1	184	185	6	0.0934855
SUPT6H	1	184	185	6	0.0934855
TET1	1	184	185	6	0.0934855
SAGE1	1	184	185	6	0.0934855
ATP1A2	1	184	185	6	0.0934855
COL5A1	1	184	185	6	0.0934855
SLC39A12	1	184	185	6	0.0934855
AMER1	1	184	185	6	0.0934855
ARHGAP31	1	184	185	6	0.0934855
CCDC88C	1	184	185	6	0.0934855
C2orf71	1	184	185	6	0.0934855
HUWE1	1	184	185	6	0.0934855
EPB41L3	1	184	185	6	0.0934855
VPS13D	1	184	185	6	0.0934855
PGR	1	184	185	6	0.0934855
ITGAD	1	184	185	6	0.0934855
ASCC3	1	184	185	6	0.0934855
KIAA1211L	1	184	185	6	0.0934855
SEMA3D	1	184	185	6	0.0934855
SLC8A1	1	184	185	6	0.0934855
PDZRN3	1	184	185	6	0.0934855
PCDHB10	4	184	185	6	0.233714
CCSER1	4	184	185	6	0.233714
UTP20	4	184	185	6	0.233714
CNTRL	4	184	185	6	0.233714
COL3A1	4	184	185	6	0.233714
PCDHA3	4	184	185	6	0.233714
PTK2	4	184	185	6	0.233714
MYH4	4	184	185	6	0.233714
PIK3C2B	4	184	185	6	0.233714
CDH11	4	184	185	6	0.233714
ALK	4	184	185	6	0.233714
MMP16	4	184	185	6	0.233714
SHROOM3	4	184	185	6	0.233714
LDB3	4	184	185	6	0.233714
AFF2	4	184	185	6	0.233714
ATP10B	4	184	185	6	0.233714
DCDC5	4	184	185	6	0.233714
ADAM12	4	184	185	6	0.233714
ADAMTS19	4	184	185	6	0.233714
SHPRH	4	184	185	6	0.233714
C20orf26	4	184	185	6	0.233714
SIGLEC1	4	184	185	6	0.233714
C19orf21	4	184	185	6	0.233714
ACVR2A	4	184	185	6	0.233714
GRM1	4	184	185	6	0.233714
FAM208A	4	184	185	6	0.233714
CHD6	4	184	185	6	0.233714
RNF123	4	184	185	6	0.233714
ZNF676	4	184	185	6	0.233714
DPP6	4	184	185	6	0.233714
MAB21L1	4	184	185	6	0.233714
THADA	4	184	185	6	0.233714
MTMR4	4	184	185	6	0.233714
PTCHD2	4	184	185	6	0.233714
TTBK1	4	184	185	6	0.233714
FARP1	4	184	185	6	0.233714
ADAMTS7	4	184	185	6	0.233714
MAGEL2	4	184	185	6	0.233714
KCNT2	4	184	185	6	0.233714
GRM3	4	184	185	6	0.233714
DHX9	4	184	185	6	0.233714
STXBP5L	2	184	185	6	0.236296
SREBF1	2	184	185	6	0.236296
MME	2	184	185	6	0.236296
CYFIP2	2	184	185	6	0.236296
RAG1	2	184	185	6	0.236296
RPS6KA3	2	184	185	6	0.236296
ABCC8	2	184	185	6	0.236296
CAMTA1	2	184	185	6	0.236296
KSR2	2	184	185	6	0.236296
LRRC4C	2	184	185	6	0.236296
HSPG2	2	184	185	6	0.236296
AP3B2	2	184	185	6	0.236296
SCN5A	2	184	185	6	0.236296
AIM1	2	184	185	6	0.236296
SASH1	2	184	185	6	0.236296
TRPM2	2	184	185	6	0.236296
DGKG	2	184	185	6	0.236296
PSMD1	2	184	185	6	0.236296
TLL1	2	184	185	6	0.236296
TLR8	2	184	185	6	0.236296
FER1L6	2	184	185	6	0.236296
SORL1	2	184	185	6	0.236296
ZFPM2	2	184	185	6	0.236296
NLRP3	2	184	185	6	0.236296
KALRN	2	184	185	6	0.236296
CCDC13	2	184	185	6	0.236296
LPHN3	2	184	185	6	0.236296
SFMBT2	2	184	185	6	0.236296
IGFN1	2	184	185	6	0.236296
AGBL1	2	184	185	6	0.236296
C1orf173	2	184	185	6	0.236296
NCOR2	2	184	185	6	0.236296
FLT1	2	184	185	6	0.236296
CACNA1A	2	184	185	6	0.236296
COL9A1	2	184	185	6	0.236296
WDR49	2	184	185	6	0.236296
ZNF318	2	184	185	6	0.236296
KCNU1	2	184	185	6	0.236296
VPS13A	2	184	185	6	0.236296
SYNE3	2	184	185	6	0.236296
PKD1	2	184	185	6	0.236296
RBL2	2	184	185	6	0.236296
ZNF28	2	184	185	6	0.236296
CACNA1H	2	184	185	6	0.236296
PCNT	2	184	185	6	0.236296
BICD1	2	184	185	6	0.236296
MYO9A	2	184	185	6	0.236296
PTEN	2	184	185	6	0.236296
ZNF429	2	184	185	6	0.236296
DLEC1	2	184	185	6	0.236296
ITIH6	2	184	185	6	0.236296
NOX3	2	184	185	6	0.236296
TRAPPC9	2	184	185	6	0.236296
CLTCL1	2	184	185	6	0.236296
ASPM	2	184	185	6	0.236296
PLEC	2	184	185	6	0.236296
LAMA5	2	184	185	6	0.236296
SLC6A3	2	184	185	6	0.236296
KIAA1731	2	184	185	6	0.236296
SLC9C2	2	184	185	6	0.236296
CNTNAP4	2	184	185	6	0.236296
FAM208B	2	184	185	6	0.236296
FOCAD	2	184	185	6	0.236296
TMEM132B	3	184	185	6	0.315061
ARHGAP33	3	184	185	6	0.315061
YTHDC2	3	184	185	6	0.315061
SIPA1L1	3	184	185	6	0.315061
KCNA5	3	184	185	6	0.315061
ANKRD30A	3	184	185	6	0.315061
ZFHX3	3	184	185	6	0.315061
USP42	3	184	185	6	0.315061
CHRM2	3	184	185	6	0.315061
SAMD9	3	184	185	6	0.315061
ZNF841	3	184	185	6	0.315061
FLNC	3	184	185	6	0.315061
COL4A2	3	184	185	6	0.315061
KIAA0355	3	184	185	6	0.315061
CDH23	3	184	185	6	0.315061
ITPR1	3	184	185	6	0.315061
ZNF518A	3	184	185	6	0.315061
PCDH10	3	184	185	6	0.315061
SYCP2	3	184	185	6	0.315061
ZNF462	3	184	185	6	0.315061
AASDH	3	184	185	6	0.315061
SLIT3	3	184	185	6	0.315061
NDST4	3	184	185	6	0.315061
GABBR1	3	184	185	6	0.315061
ANKRD30B	3	184	185	6	0.315061
SORCS1	3	184	185	6	0.315061
CPS1	3	184	185	6	0.315061
UNC45B	3	184	185	6	0.315061
ZMYM4	3	184	185	6	0.315061
FLNB	3	184	185	6	0.315061
EPG5	3	184	185	6	0.315061
RASGRF1	3	184	185	6	0.315061
ATAD2	3	184	185	6	0.315061
FNDC1	3	184	185	6	0.315061
PLA2G4A	3	184	185	6	0.315061
CNTNAP5	3	184	185	6	0.315061
COL22A1	3	184	185	6	0.315061
ANKHD1	3	184	185	6	0.315061
DIP2C	3	184	185	6	0.315061
LAMA2	3	184	185	6	0.315061
SRCAP	3	184	185	6	0.315061
PCDHGC3	3	184	185	6	0.315061
TCF20	3	184	185	6	0.315061
HECTD4	3	184	185	6	0.315061
MDC1	3	184	185	6	0.315061
SNAP91	3	184	185	6	0.315061
TRPM1	3	184	185	6	0.315061
ITGA10	3	184	185	6	0.315061
ROS1	3	184	185	6	0.315061
FGA	3	184	185	6	0.315061
NYNRIN	3	184	185	6	0.315061
ST18	3	184	185	6	0.315061
PEG3	3	184	185	6	0.315061
DPCR1	3	184	185	6	0.315061
DBN1	3	184	185	6	0.315061
NUP98	3	184	185	6	0.315061
ATP10A	3	184	185	6	0.315061
FANCA	3	184	185	6	0.315061
PAK7	3	184	185	6	0.315061
ITPR2	3	184	185	6	0.315061
RASA1	3	184	185	6	0.315061
PTPN22	3	184	185	6	0.315061
IL21R	3	184	185	6	0.315061
ABCB1	3	184	185	6	0.315061
TRRAP	3	184	185	6	0.315061
SLITRK2	3	184	185	6	0.315061
CCDC80	3	184	185	6	0.315061
ULK2	3	184	185	6	0.315061
ANK2	3	184	185	6	0.315061
BPTF	3	184	185	6	0.315061
FAM186A	3	184	185	6	0.315061
KCNAB1	3	184	185	6	0.315061
CCDC146	3	184	185	6	0.315061
BAI1	5	184	185	5	0.0299901
EGFR	5	184	185	5	0.0299901
HGF	5	184	185	5	0.0299901
INSRR	5	184	185	5	0.0299901
KCNQ3	5	184	185	5	0.0299901
LNPEP	5	184	185	5	0.0299901
URM1	5	184	185	5	0.0299901
IRS4	5	184	185	5	0.0299901
MKI67	5	184	185	5	0.0299901
XPO6	5	184	185	5	0.0299901
HEATR5B	5	184	185	5	0.0299901
TGFBRAP1	0	184	185	5	0.0308231
ARHGAP35	0	184	185	5	0.0308231
SPATA31C1	0	184	185	5	0.0308231
EFEMP1	0	184	185	5	0.0308231
COBL	0	184	185	5	0.0308231
PLEKHG3	0	184	185	5	0.0308231
TMEM132D	0	184	185	5	0.0308231
RPS6KA6	0	184	185	5	0.0308231
MYO1E	0	184	185	5	0.0308231
CCR7	0	184	185	5	0.0308231
CASP8AP2	0	184	185	5	0.0308231
ITGAV	0	184	185	5	0.0308231
WDR96	0	184	185	5	0.0308231
FHDC1	0	184	185	5	0.0308231
RBP3	0	184	185	5	0.0308231
KIAA0100	0	184	185	5	0.0308231
ZNF677	0	184	185	5	0.0308231
LTBP2	0	184	185	5	0.0308231
AKAP4	0	184	185	5	0.0308231
GMIP	0	184	185	5	0.0308231
TECTA	0	184	185	5	0.0308231
ASAP1	0	184	185	5	0.0308231
OR9G9	0	184	185	5	0.0308231
SIK1	0	184	185	5	0.0308231
ATP13A4	0	184	185	5	0.0308231
SBNO1	4	184	185	5	0.154115
NOL6	4	184	185	5	0.154115
IL12RB2	4	184	185	5	0.154115
LDOC1L	4	184	185	5	0.154115
ZNF835	4	184	185	5	0.154115
ADAMTS2	4	184	185	5	0.154115
CAMTA2	4	184	185	5	0.154115
ZNF267	4	184	185	5	0.154115
CD1E	4	184	185	5	0.154115
EDNRA	4	184	185	5	0.154115
FAT1	4	184	185	5	0.154115
SIGLEC8	4	184	185	5	0.154115
VAV3	4	184	185	5	0.154115
ERBB2IP	4	184	185	5	0.154115
SOGA2	4	184	185	5	0.154115
COL1A2	4	184	185	5	0.154115
PHF10	4	184	185	5	0.154115
NCKAP5	4	184	185	5	0.154115
MUC6	4	184	185	5	0.154115
FAM5C	4	184	185	5	0.154115
AHCTF1	4	184	185	5	0.154115
NALCN	4	184	185	5	0.154115
GAS2L2	4	184	185	5	0.154115
NES	4	184	185	5	0.154115
KBTBD12	4	184	185	5	0.154115
EPHA10	4	184	185	5	0.154115
CEP192	4	184	185	5	0.154115
FARP2	4	184	185	5	0.154115
AQR	4	184	185	5	0.154115
DNAH11	4	184	185	5	0.154115
PLXNA1	4	184	185	5	0.154115
TRHR	4	184	185	5	0.154115
JHDM1D	4	184	185	5	0.154115
SMG6	4	184	185	5	0.154115
DOCK4	4	184	185	5	0.154115
PARP14	4	184	185	5	0.154115
OR8K1	4	184	185	5	0.154115
SLC4A8	4	184	185	5	0.154115
L1CAM	4	184	185	5	0.154115
ABCC4	4	184	185	5	0.154115
EEF1A1	4	184	185	5	0.154115
NLRP12	4	184	185	5	0.154115
PRR12	4	184	185	5	0.154115
HIPK1	4	184	185	5	0.154115
GJA8	4	184	185	5	0.154115
PLCG2	4	184	185	5	0.154115
MAPK6	4	184	185	5	0.154115
PTCHD1	4	184	185	5	0.154115
DENND4A	4	184	185	5	0.154115
PLXNB3	4	184	185	5	0.154115
DENND3	4	184	185	5	0.154115
KDM4C	4	184	185	5	0.154115
IGDCC3	4	184	185	5	0.154115
PCDHGC5	4	184	185	5	0.154115
A1BG	4	184	185	5	0.154115
SETD1A	4	184	185	5	0.154115
MLXIPL	4	184	185	5	0.154115
EMR3	4	184	185	5	0.154115
TERF1	4	184	185	5	0.154115
EFCAB13	4	184	185	5	0.154115
CHSY3	4	184	185	5	0.154115
ERBB3	1	184	185	5	0.15667
CYLC2	1	184	185	5	0.15667
KIAA0317	1	184	185	5	0.15667
SATB1	1	184	185	5	0.15667
AUTS2	1	184	185	5	0.15667
FMN1	1	184	185	5	0.15667
CCDC141	1	184	185	5	0.15667
RGS22	1	184	185	5	0.15667
P2RY1	1	184	185	5	0.15667
GPR124	1	184	185	5	0.15667
RTL1	1	184	185	5	0.15667
SLC7A13	1	184	185	5	0.15667
JMJD1C	1	184	185	5	0.15667
MED12L	1	184	185	5	0.15667
NOX4	1	184	185	5	0.15667
COL11A2	1	184	185	5	0.15667
MYH9	1	184	185	5	0.15667
AKAP9	1	184	185	5	0.15667
RNF17	1	184	185	5	0.15667
COLGALT2	1	184	185	5	0.15667
FYCO1	1	184	185	5	0.15667
PLEKHG4B	1	184	185	5	0.15667
CNTNAP2	1	184	185	5	0.15667
DMXL1	1	184	185	5	0.15667
TTC3	1	184	185	5	0.15667
GPR149	1	184	185	5	0.15667
FAM160A1	1	184	185	5	0.15667
ACAT2	1	184	185	5	0.15667
SHANK1	1	184	185	5	0.15667
MYCBP2	1	184	185	5	0.15667
UBA1	1	184	185	5	0.15667
SLITRK5	1	184	185	5	0.15667
PRPF8	1	184	185	5	0.15667
NLRP2	1	184	185	5	0.15667
SH3GL2	1	184	185	5	0.15667
LGSN	1	184	185	5	0.15667
SHROOM4	1	184	185	5	0.15667
ATAD2B	1	184	185	5	0.15667
PZP	1	184	185	5	0.15667
IL10RA	1	184	185	5	0.15667
HIP1	1	184	185	5	0.15667
NUP210L	1	184	185	5	0.15667
ATP2B2	1	184	185	5	0.15667
TEP1	1	184	185	5	0.15667
VWF	1	184	185	5	0.15667
OR51G1	1	184	185	5	0.15667
SEMA3E	1	184	185	5	0.15667
C6orf170	1	184	185	5	0.15667
PCNXL2	1	184	185	5	0.15667
SLC17A6	1	184	185	5	0.15667
ANO9	1	184	185	5	0.15667
ABCA7	1	184	185	5	0.15667
PDZD2	1	184	185	5	0.15667
HIVEP2	1	184	185	5	0.15667
SLC1A6	1	184	185	5	0.15667
ITIH4	1	184	185	5	0.15667
PPM1H	1	184	185	5	0.15667
ASAP2	1	184	185	5	0.15667
OR5T2	1	184	185	5	0.15667
CELSR3	1	184	185	5	0.15667
TIAM2	1	184	185	5	0.15667
INPP4B	1	184	185	5	0.15667
NFATC4	1	184	185	5	0.15667
SI	1	184	185	5	0.15667
DUOX2	1	184	185	5	0.15667
KY	1	184	185	5	0.15667
ATRNL1	1	184	185	5	0.15667
SPEF2	1	184	185	5	0.15667
CD109	1	184	185	5	0.15667
LRFN2	1	184	185	5	0.15667
CLASP2	1	184	185	5	0.15667
NPR1	1	184	185	5	0.15667
MYO7A	1	184	185	5	0.15667
LRRC69	1	184	185	5	0.15667
BAI3	1	184	185	5	0.15667
DHX37	3	184	185	5	0.31334
UTRN	3	184	185	5	0.31334
TPTE	3	184	185	5	0.31334
EMILIN2	3	184	185	5	0.31334
EGF	3	184	185	5	0.31334
ZCCHC2	3	184	185	5	0.31334
KIT	3	184	185	5	0.31334
COL4A6	3	184	185	5	0.31334
SCRIB	3	184	185	5	0.31334
INTS1	3	184	185	5	0.31334
TMEM132C	3	184	185	5	0.31334
PRDM15	3	184	185	5	0.31334
PRSS16	3	184	185	5	0.31334
KIAA1239	3	184	185	5	0.31334
MPO	3	184	185	5	0.31334
FGR	3	184	185	5	0.31334
OR10Z1	3	184	185	5	0.31334
DOCK6	3	184	185	5	0.31334
FMNL2	3	184	185	5	0.31334
IQSEC3	3	184	185	5	0.31334
PHLDB2	3	184	185	5	0.31334
PCDH9	3	184	185	5	0.31334
CIT	3	184	185	5	0.31334
SGSM1	3	184	185	5	0.31334
HTR7	3	184	185	5	0.31334
TMEM260	3	184	185	5	0.31334
USP31	3	184	185	5	0.31334
C1orf94	3	184	185	5	0.31334
KIAA1549	3	184	185	5	0.31334
ALS2CL	3	184	185	5	0.31334
PDE10A	3	184	185	5	0.31334
SERPINB3	3	184	185	5	0.31334
MLH3	3	184	185	5	0.31334
APC	3	184	185	5	0.31334
SRRM2	3	184	185	5	0.31334
MYOM1	3	184	185	5	0.31334
ZNF334	3	184	185	5	0.31334
PRF1	3	184	185	5	0.31334
PCDHGA5	3	184	185	5	0.31334
RCSD1	3	184	185	5	0.31334
PCDHGB7	3	184	185	5	0.31334
BCLAF1	3	184	185	5	0.31334
SLC12A5	3	184	185	5	0.31334
ITGB4	3	184	185	5	0.31334
GPATCH8	3	184	185	5	0.31334
EIF4G2	3	184	185	5	0.31334
EPHA7	3	184	185	5	0.31334
COL4A5	3	184	185	5	0.31334
ADGB	3	184	185	5	0.31334
LAMC3	3	184	185	5	0.31334
MACC1	3	184	185	5	0.31334
TFAP2D	3	184	185	5	0.31334
SLC45A4	3	184	185	5	0.31334
SPTBN4	3	184	185	5	0.31334
PCDH11X	3	184	185	5	0.31334
SEC24B	3	184	185	5	0.31334
PEAK1	3	184	185	5	0.31334
PDE8A	3	184	185	5	0.31334
TNR	3	184	185	5	0.31334
HIST1H1C	3	184	185	5	0.31334
KIAA1551	3	184	185	5	0.31334
NRCAM	3	184	185	5	0.31334
LHCGR	3	184	185	5	0.31334
GADL1	3	184	185	5	0.31334
GPR112	3	184	185	5	0.31334
TNPO1	3	184	185	5	0.31334
SLITRK1	3	184	185	5	0.31334
HDLBP	3	184	185	5	0.31334
FGD5	3	184	185	5	0.31334
EP300	3	184	185	5	0.31334
ATP8A1	3	184	185	5	0.31334
USP20	3	184	185	5	0.31334
FBLN1	3	184	185	5	0.31334
ANKRD32	3	184	185	5	0.31334
FILIP1	3	184	185	5	0.31334
ADAMTSL4	3	184	185	5	0.31334
CCDC129	3	184	185	5	0.31334
CABIN1	3	184	185	5	0.31334
TSHZ3	3	184	185	5	0.31334
CTCF	3	184	185	5	0.31334
ASXL3	3	184	185	5	0.31334
GRIP2	3	184	185	5	0.31334
RGAG1	3	184	185	5	0.31334
GEMIN5	3	184	185	5	0.31334
PLEKHG1	3	184	185	5	0.31334
HIF3A	3	184	185	5	0.31334
SLC25A12	3	184	185	5	0.31334
XIRP1	3	184	185	5	0.31334
GPSM1	3	184	185	5	0.31334
GRIA3	3	184	185	5	0.31334
KIF16B	3	184	185	5	0.31334
ABR	3	184	185	5	0.31334
HYOU1	3	184	185	5	0.31334
TRAK2	3	184	185	5	0.31334
FAM46D	3	184	185	5	0.31334
LTBP1	3	184	185	5	0.31334
PIK3C2G	3	184	185	5	0.31334
CCR6	3	184	185	5	0.31334
LMTK2	3	184	185	5	0.31334
ATG2B	3	184	185	5	0.31334
ABCA3	3	184	185	5	0.31334
GAB1	3	184	185	5	0.31334
ACACA	3	184	185	5	0.31334
NTRK3	3	184	185	5	0.31334
UGT2B4	3	184	185	5	0.31334
SLITRK6	3	184	185	5	0.31334
KIAA0556	3	184	185	5	0.31334
SLC24A2	3	184	185	5	0.31334
MED13	3	184	185	5	0.31334
ITGA9	3	184	185	5	0.31334
TNK2	3	184	185	5	0.31334
MERTK	3	184	185	5	0.31334
SLC30A1	3	184	185	5	0.31334
RUNX1T1	3	184	185	5	0.31334
BAHCC1	3	184	185	5	0.31334
ANKRD24	3	184	185	5	0.31334
FBF1	3	184	185	5	0.31334
TCHH	3	184	185	5	0.31334
KRT1	3	184	185	5	0.31334
ADAMTS1	3	184	185	5	0.31334
IL1RAPL2	3	184	185	5	0.31334
ZNF311	3	184	185	5	0.31334
PRKG1	3	184	185	5	0.31334
PYGM	3	184	185	5	0.31334
CEP152	2	184	185	5	0.315061
DSE	2	184	185	5	0.315061
BAG6	2	184	185	5	0.315061
OR6Y1	2	184	185	5	0.315061
RAB3GAP2	2	184	185	5	0.315061
ZNF423	2	184	185	5	0.315061
CAND2	2	184	185	5	0.315061
ERBB4	2	184	185	5	0.315061
FRYL	2	184	185	5	0.315061
TEX14	2	184	185	5	0.315061
CACNA2D4	2	184	185	5	0.315061
CPAMD8	2	184	185	5	0.315061
MCM10	2	184	185	5	0.315061
KIF1B	2	184	185	5	0.315061
CLCN1	2	184	185	5	0.315061
CDH6	2	184	185	5	0.315061
BRCA2	2	184	185	5	0.315061
NCOA2	2	184	185	5	0.315061
TP53BP2	2	184	185	5	0.315061
NEO1	2	184	185	5	0.315061
HK2	2	184	185	5	0.315061
RALGAPA2	2	184	185	5	0.315061
PKD1L2	2	184	185	5	0.315061
EVC2	2	184	185	5	0.315061
ZFP64	2	184	185	5	0.315061
IL17RD	2	184	185	5	0.315061
VWA3B	2	184	185	5	0.315061
SMC5	2	184	185	5	0.315061
MLL5	2	184	185	5	0.315061
SYT9	2	184	185	5	0.315061
UBA6	2	184	185	5	0.315061
SGCZ	2	184	185	5	0.315061
PLB1	2	184	185	5	0.315061
DYSF	2	184	185	5	0.315061
KIF13A	2	184	185	5	0.315061
ECE2	2	184	185	5	0.315061
MAPK7	2	184	185	5	0.315061
POTEC	2	184	185	5	0.315061
ZCCHC6	2	184	185	5	0.315061
ENTPD1	2	184	185	5	0.315061
FLRT2	2	184	185	5	0.315061
NID2	2	184	185	5	0.315061
PPP1R3A	2	184	185	5	0.315061
SMCHD1	2	184	185	5	0.315061
GRIA1	2	184	185	5	0.315061
ERC2	2	184	185	5	0.315061
EPPK1	2	184	185	5	0.315061
CCT3	2	184	185	5	0.315061
ITGA2	2	184	185	5	0.315061
HKDC1	2	184	185	5	0.315061
SUPT20H	2	184	185	5	0.315061
ITGA8	2	184	185	5	0.315061
KIAA1033	2	184	185	5	0.315061
MCM3AP	2	184	185	5	0.315061
ZNF681	2	184	185	5	0.315061
AMER3	2	184	185	5	0.315061
IGSF10	2	184	185	5	0.315061
DOCK1	2	184	185	5	0.315061
PDE1C	2	184	185	5	0.315061
KCNMA1	2	184	185	5	0.315061
DTNA	2	184	185	5	0.315061
CHD4	2	184	185	5	0.315061
ARHGEF18	2	184	185	5	0.315061
C6orf165	2	184	185	5	0.315061
NXF3	2	184	185	5	0.315061
RGS12	2	184	185	5	0.315061
NCAM1	2	184	185	5	0.315061
SLC13A4	2	184	185	5	0.315061
TOP2B	2	184	185	5	0.315061
EPHA5	2	184	185	5	0.315061
TRAPPC8	2	184	185	5	0.315061
HERC2P3	2	184	185	5	0.315061
TYW1	2	184	185	5	0.315061
NOS2	2	184	185	5	0.315061
GRAMD1B	2	184	185	5	0.315061
SH3TC2	2	184	185	5	0.315061
RASSF10	2	184	185	5	0.315061
PCDHGA10	2	184	185	5	0.315061
ATP4A	2	184	185	5	0.315061
INSR	2	184	185	5	0.315061
ARHGEF40	2	184	185	5	0.315061
EPHA4	2	184	185	5	0.315061
FCRL5	2	184	185	5	0.315061
NHSL1	2	184	185	5	0.315061
NUP188	2	184	185	5	0.315061
TLE4	2	184	185	5	0.315061
PRDM16	2	184	185	5	0.315061
CHRNA4	2	184	185	5	0.315061
SCN7A	2	184	185	5	0.315061
NYAP1	2	184	185	5	0.315061
PCF11	2	184	185	5	0.315061
SLC4A10	2	184	185	5	0.315061
PCDHA11	2	184	185	5	0.315061
GABRA4	2	184	185	5	0.315061
IL12A	2	184	185	5	0.315061
MYH8	2	184	185	5	0.315061
VEPH1	2	184	185	5	0.315061
THEMIS	2	184	185	5	0.315061
ZNF777	2	184	185	5	0.315061
EBF1	2	184	185	5	0.315061
DNM3	2	184	185	5	0.315061
CHAT	2	184	185	5	0.315061
ARHGEF17	2	184	185	5	0.315061
SLC22A8	2	184	185	5	0.315061
HECW1	2	184	185	5	0.315061
NCKAP5L	2	184	185	5	0.315061
ZNF629	2	184	185	5	0.315061
RLIM	2	184	185	5	0.315061
DAO	2	184	185	5	0.315061
EVX2	2	184	185	5	0.315061
HRNR	2	184	185	5	0.315061
FIGN	2	184	185	5	0.315061
MYOCD	2	184	185	5	0.315061
CD163L1	2	184	185	5	0.315061
NAV2	2	184	185	5	0.315061
EPHB3	2	184	185	5	0.315061
ADCY10	2	184	185	5	0.315061
KCNK10	2	184	185	5	0.315061
OR2M3	2	184	185	5	0.315061
OR2T4	2	184	185	5	0.315061
RXRA	2	184	185	5	0.315061
PDZRN4	2	184	185	5	0.315061
SLC9A6	2	184	185	5	0.315061
WDR33	2	184	185	5	0.315061
KCTD8	2	184	185	5	0.315061
UBR2	2	184	185	5	0.315061
BRCA1	2	184	185	5	0.315061
KIAA1407	2	184	185	5	0.315061
C1QTNF2	2	184	185	5	0.315061
JMJD7-PLA2G4B	2	184	185	5	0.315061
ZNF99	2	184	185	5	0.315061
CNOT1	2	184	185	5	0.315061
NAA16	2	184	185	5	0.315061
KCNH1	2	184	185	5	0.315061
RADIL	2	184	185	5	0.315061
CTNNA2	2	184	185	5	0.315061
USP25	2	184	185	5	0.315061
KIF13B	2	184	185	5	0.315061
TNS1	2	184	185	5	0.315061
LIPI	2	184	185	5	0.315061
BBS9	2	184	185	5	0.315061
SLC26A4	2	184	185	5	0.315061
SIPA1L3	2	184	185	5	0.315061
PCDHB1	2	184	185	5	0.315061
GABRG1	2	184	185	5	0.315061
ATP1A3	2	184	185	5	0.315061
IMPG1	2	184	185	5	0.315061
CADM2	2	184	185	5	0.315061
KDM6B	2	184	185	5	0.315061
PPP1R13B	2	184	185	5	0.315061
PLXNB1	2	184	185	5	0.315061
RANBP17	2	184	185	5	0.315061
OR6K2	2	184	185	5	0.315061
EIF4G1	2	184	185	5	0.315061
AP2B1	2	184	185	5	0.315061
GABRQ	2	184	185	5	0.315061
PCDHA10	2	184	185	5	0.315061
ELL2	2	184	185	5	0.315061
SGOL2	2	184	185	5	0.315061
CCDC39	2	184	185	5	0.315061
THBS1	4	184	185	4	0.0608132
PRMT10	4	184	185	4	0.0608132
CNTN5	4	184	185	4	0.0608132
AKAP3	4	184	185	4	0.0608132
KIF26A	4	184	185	4	0.0608132
MAST2	4	184	185	4	0.0608132
MN1	4	184	185	4	0.0608132
MRVI1	4	184	185	4	0.0608132
SLC1A3	4	184	185	4	0.0608132
GRM4	4	184	185	4	0.0608132
PADI4	4	184	185	4	0.0608132
SKIV2L2	4	184	185	4	0.0608132
ATP2B4	4	184	185	4	0.0608132
DHX57	4	184	185	4	0.0608132
GUSB	4	184	185	4	0.0608132
EML3	4	184	185	4	0.0608132
TBX2	4	184	185	4	0.0608132
PAPPA	4	184	185	4	0.0608132
PDXDC1	4	184	185	4	0.0608132
PSG11	4	184	185	4	0.0608132
OSBPL7	4	184	185	4	0.0608132
SCN3B	4	184	185	4	0.0608132
MYBPC2	4	184	185	4	0.0608132
ATP7B	4	184	185	4	0.0608132
OR2T6	4	184	185	4	0.0608132
DARC	4	184	185	4	0.0608132
PGBD2	4	184	185	4	0.0608132
SPAG6	4	184	185	4	0.0608132
ZNF675	4	184	185	4	0.0608132
ABCA2	4	184	185	4	0.0608132
CAMSAP2	4	184	185	4	0.0608132
NOD2	4	184	185	4	0.0608132
SHC4	4	184	185	4	0.0608132
CD6	0	184	185	4	0.0621571
IQGAP1	0	184	185	4	0.0621571
LCT	0	184	185	4	0.0621571
OXSM	0	184	185	4	0.0621571
SOGA1	0	184	185	4	0.0621571
KIF4B	0	184	185	4	0.0621571
MYH10	0	184	185	4	0.0621571
ACAD11	0	184	185	4	0.0621571
EPHA8	0	184	185	4	0.0621571
IL12RB1	0	184	185	4	0.0621571
SCN9A	0	184	185	4	0.0621571
LCE1E	0	184	185	4	0.0621571
ADAMTSL3	0	184	185	4	0.0621571
DDHD1	0	184	185	4	0.0621571
ANTXR1	0	184	185	4	0.0621571
FGFR2	0	184	185	4	0.0621571
MSLN	0	184	185	4	0.0621571
MTF1	0	184	185	4	0.0621571
PPP2R5B	0	184	185	4	0.0621571
USP15	0	184	185	4	0.0621571
ERC1	0	184	185	4	0.0621571
ZNF470	0	184	185	4	0.0621571
VWCE	0	184	185	4	0.0621571
FIG4	0	184	185	4	0.0621571
SIPA1L2	0	184	185	4	0.0621571
AMPD1	0	184	185	4	0.0621571
PPP5C	0	184	185	4	0.0621571
KLHL1	0	184	185	4	0.0621571
BRPF1	0	184	185	4	0.0621571
TBC1D8	0	184	185	4	0.0621571
ITIH5	0	184	185	4	0.0621571
ADAM17	0	184	185	4	0.0621571
PROM1	0	184	185	4	0.0621571
PLEKHA5	0	184	185	4	0.0621571
INPPL1	0	184	185	4	0.0621571
TLR1	0	184	185	4	0.0621571
CHST3	0	184	185	4	0.0621571
ZNF347	0	184	185	4	0.0621571
GSE1	0	184	185	4	0.0621571
ALPK1	0	184	185	4	0.0621571
CCDC6	0	184	185	4	0.0621571
NDST3	0	184	185	4	0.0621571
MAP1A	0	184	185	4	0.0621571
ELAVL3	0	184	185	4	0.0621571
MST1R	0	184	185	4	0.0621571
IPO7	0	184	185	4	0.0621571
MED14	0	184	185	4	0.0621571
ZNF488	0	184	185	4	0.0621571
SZT2	0	184	185	4	0.0621571
USP47	0	184	185	4	0.0621571
GUF1	0	184	185	4	0.0621571
GRID2	3	184	185	4	0.248628
EPB41L4A	3	184	185	4	0.248628
LYPD3	3	184	185	4	0.248628
TOP2A	3	184	185	4	0.248628
CDH1	3	184	185	4	0.248628
USP36	3	184	185	4	0.248628
MAT1A	3	184	185	4	0.248628
ZC3HAV1	3	184	185	4	0.248628
AKT2	3	184	185	4	0.248628
PABPC4L	3	184	185	4	0.248628
POLG	3	184	185	4	0.248628
LRBA	3	184	185	4	0.248628
KCNH8	3	184	185	4	0.248628
PPP2R3A	3	184	185	4	0.248628
DHTKD1	3	184	185	4	0.248628
ARHGEF15	3	184	185	4	0.248628
CRY1	3	184	185	4	0.248628
ABCC3	3	184	185	4	0.248628
GUCY1A2	3	184	185	4	0.248628
PECR	3	184	185	4	0.248628
MUSK	3	184	185	4	0.248628
NYAP2	3	184	185	4	0.248628
RBFOX1	3	184	185	4	0.248628
NEK11	3	184	185	4	0.248628
STEAP3	3	184	185	4	0.248628
MROH5	3	184	185	4	0.248628
APEH	3	184	185	4	0.248628
HEPACAM2	3	184	185	4	0.248628
SYT4	3	184	185	4	0.248628
UNC13A	3	184	185	4	0.248628
MAATS1	3	184	185	4	0.248628
OLFML2A	3	184	185	4	0.248628
NWD1	3	184	185	4	0.248628
TBCK	3	184	185	4	0.248628
GAD1	3	184	185	4	0.248628
ROR2	3	184	185	4	0.248628
CNOT10	3	184	185	4	0.248628
KLHL33	3	184	185	4	0.248628
DYTN	3	184	185	4	0.248628
NFAT5	3	184	185	4	0.248628
NHS	3	184	185	4	0.248628
CNTN2	3	184	185	4	0.248628
MTMR7	3	184	185	4	0.248628
CMYA5	3	184	185	4	0.248628
TRERF1	3	184	185	4	0.248628
SP3	3	184	185	4	0.248628
POU5F1B	3	184	185	4	0.248628
MLST8	3	184	185	4	0.248628
PHF8	3	184	185	4	0.248628
PTPRN2	3	184	185	4	0.248628
EFCAB14	3	184	185	4	0.248628
GABRA1	3	184	185	4	0.248628
CCDC135	3	184	185	4	0.248628
CHPF	3	184	185	4	0.248628
PAPPA2	3	184	185	4	0.248628
ZNF365	3	184	185	4	0.248628
PRKCQ	3	184	185	4	0.248628
RAPGEF2	3	184	185	4	0.248628
MAGEE2	3	184	185	4	0.248628
CEP97	3	184	185	4	0.248628
PRX	3	184	185	4	0.248628
OR8H2	3	184	185	4	0.248628
IVL	3	184	185	4	0.248628
ZBTB40	3	184	185	4	0.248628
TDRD9	3	184	185	4	0.248628
CENPJ	3	184	185	4	0.248628
KCP	3	184	185	4	0.248628
AXIN2	3	184	185	4	0.248628
HDAC10	3	184	185	4	0.248628
AKNA	3	184	185	4	0.248628
CRTC2	3	184	185	4	0.248628
ZFP106	3	184	185	4	0.248628
ROR1	3	184	185	4	0.248628
AKAP11	3	184	185	4	0.248628
HIBCH	3	184	185	4	0.248628
CSNK1A1L	3	184	185	4	0.248628
ATRX	3	184	185	4	0.248628
POC5	3	184	185	4	0.248628
ITGAL	3	184	185	4	0.248628
TMC6	3	184	185	4	0.248628
FGGY	3	184	185	4	0.248628
WWP2	3	184	185	4	0.248628
NRXN3	3	184	185	4	0.248628
F10	3	184	185	4	0.248628
DDX50	3	184	185	4	0.248628
HIPK2	3	184	185	4	0.248628
DVL2	3	184	185	4	0.248628
DFNA5	3	184	185	4	0.248628
NFE2L2	3	184	185	4	0.248628
PHF2	3	184	185	4	0.248628
ZDBF2	3	184	185	4	0.248628
COL18A1	3	184	185	4	0.248628
CSPP1	3	184	185	4	0.248628
ARHGAP23	3	184	185	4	0.248628
OR4M1	3	184	185	4	0.248628
ARHGAP32	3	184	185	4	0.248628
JAK3	3	184	185	4	0.248628
OGN	3	184	185	4	0.248628
IRGC	3	184	185	4	0.248628
VWA5B2	3	184	185	4	0.248628
SOS1	3	184	185	4	0.248628
UMODL1	3	184	185	4	0.248628
ZNF20	3	184	185	4	0.248628
TRPC6	3	184	185	4	0.248628
ANKRD17	3	184	185	4	0.248628
NPAS2	3	184	185	4	0.248628
ILDR1	3	184	185	4	0.248628
PITPNM2	3	184	185	4	0.248628
GALNT6	3	184	185	4	0.248628
ACOT12	3	184	185	4	0.248628
SLC6A2	3	184	185	4	0.248628
PATL1	3	184	185	4	0.248628
EPHB2	3	184	185	4	0.248628
B4GALNT3	3	184	185	4	0.248628
CCDC132	3	184	185	4	0.248628
CGNL1	3	184	185	4	0.248628
WDR7	3	184	185	4	0.248628
KTN1	3	184	185	4	0.248628
PHKB	3	184	185	4	0.248628
KRT79	3	184	185	4	0.248628
MYH2	3	184	185	4	0.248628
OTOP1	3	184	185	4	0.248628
JAKMIP1	3	184	185	4	0.248628
PCBP3	3	184	185	4	0.248628
ITGA11	3	184	185	4	0.248628
PRKD2	3	184	185	4	0.248628
WBSCR17	3	184	185	4	0.248628
PITPNM1	3	184	185	4	0.248628
NLRP9	3	184	185	4	0.248628
MYO7B	3	184	185	4	0.248628
CLCA2	3	184	185	4	0.248628
TMC1	3	184	185	4	0.248628
ADAMTS12	3	184	185	4	0.248628
SYT16	3	184	185	4	0.248628
CTC1	3	184	185	4	0.248628
KCNK2	3	184	185	4	0.248628
MLLT4	3	184	185	4	0.248628
PTPN9	3	184	185	4	0.248628
MNDA	3	184	185	4	0.248628
CDKN1A	3	184	185	4	0.248628
KIAA1522	3	184	185	4	0.248628
HIPK3	3	184	185	4	0.248628
KIAA1614	3	184	185	4	0.248628
KLF15	3	184	185	4	0.248628
SENP2	3	184	185	4	0.248628
GFM2	3	184	185	4	0.248628
MYT1	3	184	185	4	0.248628
EPRS	3	184	185	4	0.248628
VWA8	3	184	185	4	0.248628
LRRC6	3	184	185	4	0.248628
ZSWIM2	3	184	185	4	0.248628
NELL1	3	184	185	4	0.248628
IDH2	3	184	185	4	0.248628
DOK7	3	184	185	4	0.248628
NOL4	3	184	185	4	0.248628
PDPR	3	184	185	4	0.248628
ESPNL	3	184	185	4	0.248628
TMEM132E	3	184	185	4	0.248628
OR2T12	3	184	185	4	0.248628
ARID5B	3	184	185	4	0.248628
MAGEC1	3	184	185	4	0.248628
SLC10A2	3	184	185	4	0.248628
DOCK3	3	184	185	4	0.248628
OR51I1	3	184	185	4	0.248628
ZNF512B	1	184	185	4	0.251361
KRT35	1	184	185	4	0.251361
RAPGEF1	1	184	185	4	0.251361
CR1L	1	184	185	4	0.251361
C10orf12	1	184	185	4	0.251361
L3MBTL3	1	184	185	4	0.251361
SPTAN1	1	184	185	4	0.251361
DCSTAMP	1	184	185	4	0.251361
SEMA3C	1	184	185	4	0.251361
ZNF430	1	184	185	4	0.251361
WNK2	1	184	185	4	0.251361
DOCK11	1	184	185	4	0.251361
TBX4	1	184	185	4	0.251361
UNC5D	1	184	185	4	0.251361
NPSR1	1	184	185	4	0.251361
OR51S1	1	184	185	4	0.251361
FBLN2	1	184	185	4	0.251361
ESR1	1	184	185	4	0.251361
MIA3	1	184	185	4	0.251361
SLC6A15	1	184	185	4	0.251361
CAD	1	184	185	4	0.251361
PER2	1	184	185	4	0.251361
RRP1B	1	184	185	4	0.251361
PBX1	1	184	185	4	0.251361
F5	1	184	185	4	0.251361
EXO1	1	184	185	4	0.251361
SYT10	1	184	185	4	0.251361
RET	1	184	185	4	0.251361
TGM7	1	184	185	4	0.251361
TLN1	1	184	185	4	0.251361
PCDHGA6	1	184	185	4	0.251361
IL18RAP	1	184	185	4	0.251361
KIAA1586	1	184	185	4	0.251361
RGS7	1	184	185	4	0.251361
UNKL	1	184	185	4	0.251361
ODF2	1	184	185	4	0.251361
RAB18	1	184	185	4	0.251361
SND1	1	184	185	4	0.251361
GREB1	1	184	185	4	0.251361
C2CD5	1	184	185	4	0.251361
ABCC9	1	184	185	4	0.251361
CFH	1	184	185	4	0.251361
OPCML	1	184	185	4	0.251361
TUSC3	1	184	185	4	0.251361
KRTAP16-1	1	184	185	4	0.251361
ADAMTS14	1	184	185	4	0.251361
ZFYVE9	1	184	185	4	0.251361
PLA2G4E	1	184	185	4	0.251361
ZNF107	1	184	185	4	0.251361
PCDH17	1	184	185	4	0.251361
IQUB	1	184	185	4	0.251361
MPDZ	1	184	185	4	0.251361
CHRM3	1	184	185	4	0.251361
INSIG1	1	184	185	4	0.251361
PARD3B	1	184	185	4	0.251361
LEPR	1	184	185	4	0.251361
ARAP3	1	184	185	4	0.251361
C15orf55	1	184	185	4	0.251361
BCOR	1	184	185	4	0.251361
ARMC3	1	184	185	4	0.251361
NUP93	1	184	185	4	0.251361
PPIP5K2	1	184	185	4	0.251361
ZNF827	1	184	185	4	0.251361
TNC	1	184	185	4	0.251361
WHSC1L1	1	184	185	4	0.251361
PCDHGA3	1	184	185	4	0.251361
FEM1A	1	184	185	4	0.251361
AP4E1	1	184	185	4	0.251361
PPP1R12A	1	184	185	4	0.251361
HFM1	1	184	185	4	0.251361
C3P1	1	184	185	4	0.251361
ZNF98	1	184	185	4	0.251361
MAN2A1	1	184	185	4	0.251361
VIM	1	184	185	4	0.251361
PLD3	1	184	185	4	0.251361
CASR	1	184	185	4	0.251361
TMPRSS11D	1	184	185	4	0.251361
BZRAP1	1	184	185	4	0.251361
PAK3	1	184	185	4	0.251361
OLFM3	1	184	185	4	0.251361
CNGA4	1	184	185	4	0.251361
EIF4G3	1	184	185	4	0.251361
BAI2	1	184	185	4	0.251361
MYCBPAP	1	184	185	4	0.251361
NPY5R	1	184	185	4	0.251361
FOXS1	1	184	185	4	0.251361
SEC16A	1	184	185	4	0.251361
OR2L13	1	184	185	4	0.251361
ATP5B	1	184	185	4	0.251361
SMYD1	1	184	185	4	0.251361
PIGQ	1	184	185	4	0.251361
PTPN5	1	184	185	4	0.251361
IFT140	1	184	185	4	0.251361
DHX34	1	184	185	4	0.251361
ZNFX1	1	184	185	4	0.251361
TENM1	1	184	185	4	0.251361
LPA	1	184	185	4	0.251361
TTC27	1	184	185	4	0.251361
DDX60L	1	184	185	4	0.251361
PLCB2	1	184	185	4	0.251361
MICAL1	1	184	185	4	0.251361
ATCAY	1	184	185	4	0.251361
GUCY1B3	1	184	185	4	0.251361
TRPM8	1	184	185	4	0.251361
SRRM5	1	184	185	4	0.251361
ADAM18	1	184	185	4	0.251361
IGSF3	1	184	185	4	0.251361
ZBTB2	1	184	185	4	0.251361
RAI14	1	184	185	4	0.251361
GRM8	1	184	185	4	0.251361
POLR2A	1	184	185	4	0.251361
NUP133	1	184	185	4	0.251361
GPR63	1	184	185	4	0.251361
C1orf65	1	184	185	4	0.251361
PCDHB8	1	184	185	4	0.251361
ZNF234	1	184	185	4	0.251361
GREB1L	1	184	185	4	0.251361
CCDC30	1	184	185	4	0.251361
AP3B1	1	184	185	4	0.251361
ZEB2	1	184	185	4	0.251361
ZNF608	1	184	185	4	0.251361
OAS2	1	184	185	4	0.251361
LRIG2	1	184	185	4	0.251361
USP9X	1	184	185	4	0.251361
CDC45	1	184	185	4	0.251361
OPN4	1	184	185	4	0.251361
TMF1	1	184	185	4	0.251361
KAT2B	1	184	185	4	0.251361
TJP2	1	184	185	4	0.251361
PMEPA1	1	184	185	4	0.251361
FLNA	1	184	185	4	0.251361
NCAPD3	1	184	185	4	0.251361
MBD1	1	184	185	4	0.251361
EYA1	1	184	185	4	0.251361
ACVRL1	1	184	185	4	0.251361
OR2J3	1	184	185	4	0.251361
CRIP3	1	184	185	4	0.251361
C3orf30	1	184	185	4	0.251361
FSTL5	1	184	185	4	0.251361
USP24	1	184	185	4	0.251361
ASNS	1	184	185	4	0.251361
ENGASE	1	184	185	4	0.251361
AATK	1	184	185	4	0.251361
CHD2	1	184	185	4	0.251361
ERN2	1	184	185	4	0.251361
MED23	1	184	185	4	0.251361
SAMD15	1	184	185	4	0.251361
PIWIL1	1	184	185	4	0.251361
COPA	1	184	185	4	0.251361
KIAA1755	1	184	185	4	0.251361
DOCK7	1	184	185	4	0.251361
TBR1	1	184	185	4	0.251361
PGM3	1	184	185	4	0.251361
LILRB1	1	184	185	4	0.251361
PCDHA13	1	184	185	4	0.251361
RABGGTA	1	184	185	4	0.251361
C6	1	184	185	4	0.251361
ANK3	1	184	185	4	0.251361
GRAMD4	1	184	185	4	0.251361
GLG1	1	184	185	4	0.251361
NELFB	1	184	185	4	0.251361
ARHGEF12	1	184	185	4	0.251361
FMN2	1	184	185	4	0.251361
PRICKLE1	1	184	185	4	0.251361
POMT2	1	184	185	4	0.251361
DEF6	1	184	185	4	0.251361
ARHGAP39	1	184	185	4	0.251361
DTX3	1	184	185	4	0.251361
GRK7	1	184	185	4	0.251361
BNC1	1	184	185	4	0.251361
MAGEC3	1	184	185	4	0.251361
AADAC	1	184	185	4	0.251361
PRDM1	1	184	185	4	0.251361
KCNT1	1	184	185	4	0.251361
RIPK3	1	184	185	4	0.251361
DIP2A	1	184	185	4	0.251361
SYNPO2	1	184	185	4	0.251361
DNAJC6	1	184	185	4	0.251361
TTLL4	1	184	185	4	0.251361
SEMA6A	1	184	185	4	0.251361
ZNF790	1	184	185	4	0.251361
PTPN14	1	184	185	4	0.251361
RUSC1	1	184	185	4	0.251361
EIF4E1B	1	184	185	4	0.251361
DICER1	1	184	185	4	0.251361
N4BP2L2	1	184	185	4	0.251361
ARNT2	1	184	185	4	0.251361
WDR65	1	184	185	4	0.251361
TMPRSS15	1	184	185	4	0.251361
MYO5A	1	184	185	4	0.251361
AMBRA1	1	184	185	4	0.251361
TPR	1	184	185	4	0.251361
SEZ6L2	1	184	185	4	0.251361
POTEH	1	184	185	4	0.251361
GOSR2	1	184	185	4	0.251361
CEP89	1	184	185	4	0.251361
SMG1	1	184	185	4	0.251361
DOCK9	1	184	185	4	0.251361
MST1	1	184	185	4	0.251361
LRPPRC	1	184	185	4	0.251361
ATP1A4	1	184	185	4	0.251361
RASSF4	1	184	185	4	0.251361
HUNK	1	184	185	4	0.251361
MEF2A	1	184	185	4	0.251361
PLCG1	1	184	185	4	0.251361
RFX7	1	184	185	4	0.251361
SP4	2	184	185	4	0.377041
C10orf71	2	184	185	4	0.377041
DISC1	2	184	185	4	0.377041
NFRKB	2	184	185	4	0.377041
RTEL1	2	184	185	4	0.377041
LOC100653515	2	184	185	4	0.377041
ACTN2	2	184	185	4	0.377041
SFI1	2	184	185	4	0.377041
OR4A5	2	184	185	4	0.377041
PIK3C2A	2	184	185	4	0.377041
SLC9A3	2	184	185	4	0.377041
KIF2B	2	184	185	4	0.377041
GH2	2	184	185	4	0.377041
CACNA1D	2	184	185	4	0.377041
ZNF665	2	184	185	4	0.377041
42615	2	184	185	4	0.377041
LPO	2	184	185	4	0.377041
ARHGAP10	2	184	185	4	0.377041
42435	2	184	185	4	0.377041
OR2B11	2	184	185	4	0.377041
BRD8	2	184	185	4	0.377041
KAT6A	2	184	185	4	0.377041
ADORA3	2	184	185	4	0.377041
SLC44A5	2	184	185	4	0.377041
ZNF71	2	184	185	4	0.377041
CEP250	2	184	185	4	0.377041
PKDREJ	2	184	185	4	0.377041
TNKS	2	184	185	4	0.377041
PBRM1	2	184	185	4	0.377041
ZNF256	2	184	185	4	0.377041
SNX13	2	184	185	4	0.377041
ATP2B1	2	184	185	4	0.377041
ESRP1	2	184	185	4	0.377041
ANKLE2	2	184	185	4	0.377041
NRAP	2	184	185	4	0.377041
BCL11A	2	184	185	4	0.377041
ZNF716	2	184	185	4	0.377041
IDE	2	184	185	4	0.377041
DLK2	2	184	185	4	0.377041
CACNA1S	2	184	185	4	0.377041
SMOX	2	184	185	4	0.377041
PPP2R5D	2	184	185	4	0.377041
STAC	2	184	185	4	0.377041
DNER	2	184	185	4	0.377041
LRRN3	2	184	185	4	0.377041
DENND2A	2	184	185	4	0.377041
KCTD16	2	184	185	4	0.377041
GLDC	2	184	185	4	0.377041
SPATA13	2	184	185	4	0.377041
AMPH	2	184	185	4	0.377041
FAM227B	2	184	185	4	0.377041
SIAH1	2	184	185	4	0.377041
CDH15	2	184	185	4	0.377041
PDGFRA	2	184	185	4	0.377041
ATP13A5	2	184	185	4	0.377041
OR14A16	2	184	185	4	0.377041
ABCA6	2	184	185	4	0.377041
CEP128	2	184	185	4	0.377041
SOCS6	2	184	185	4	0.377041
PTGR1	2	184	185	4	0.377041
CYP39A1	2	184	185	4	0.377041
FAM83H	2	184	185	4	0.377041
CIC	2	184	185	4	0.377041
HTR2C	2	184	185	4	0.377041
QRICH2	2	184	185	4	0.377041
BRD4	2	184	185	4	0.377041
PHIP	2	184	185	4	0.377041
COBLL1	2	184	185	4	0.377041
GRID2IP	2	184	185	4	0.377041
RTKN2	2	184	185	4	0.377041
PTPRA	2	184	185	4	0.377041
STXBP3	2	184	185	4	0.377041
P2RX6	2	184	185	4	0.377041
MFN1	2	184	185	4	0.377041
IWS1	2	184	185	4	0.377041
NFKB1	2	184	185	4	0.377041
RBL1	2	184	185	4	0.377041
CROCC	2	184	185	4	0.377041
AFMID	2	184	185	4	0.377041
MTMR1	2	184	185	4	0.377041
RFC1	2	184	185	4	0.377041
ST6GAL2	2	184	185	4	0.377041
EFHC2	2	184	185	4	0.377041
FBXL4	2	184	185	4	0.377041
KRT40	2	184	185	4	0.377041
CACNA2D1	2	184	185	4	0.377041
KIAA0586	2	184	185	4	0.377041
ARHGEF10L	2	184	185	4	0.377041
USP4	2	184	185	4	0.377041
T	2	184	185	4	0.377041
MAP3K5	2	184	185	4	0.377041
DSPP	2	184	185	4	0.377041
HCN4	2	184	185	4	0.377041
AEBP1	2	184	185	4	0.377041
PRR16	2	184	185	4	0.377041
SHANK3	2	184	185	4	0.377041
GAPVD1	2	184	185	4	0.377041
VPS13B	2	184	185	4	0.377041
ZFYVE16	2	184	185	4	0.377041
TBC1D9B	2	184	185	4	0.377041
URB2	2	184	185	4	0.377041
DPY19L1	2	184	185	4	0.377041
CPA6	2	184	185	4	0.377041
KIAA1683	2	184	185	4	0.377041
ADAM23	2	184	185	4	0.377041
GUCY2C	2	184	185	4	0.377041
LRRTM3	2	184	185	4	0.377041
ITGA4	2	184	185	4	0.377041
ARHGAP25	2	184	185	4	0.377041
LPHN1	2	184	185	4	0.377041
CDCA7	2	184	185	4	0.377041
TUBB8	2	184	185	4	0.377041
NLRX1	2	184	185	4	0.377041
CYP3A5	2	184	185	4	0.377041
NOVA1	2	184	185	4	0.377041
RNF216	2	184	185	4	0.377041
ARHGEF2	2	184	185	4	0.377041
ACPP	2	184	185	4	0.377041
POSTN	2	184	185	4	0.377041
ADNP2	2	184	185	4	0.377041
ARHGEF28	2	184	185	4	0.377041
DACH2	2	184	185	4	0.377041
KRAS	2	184	185	4	0.377041
KRTAP5-1	2	184	185	4	0.377041
SPECC1	2	184	185	4	0.377041
SPAST	2	184	185	4	0.377041
ATXN7L1	2	184	185	4	0.377041
CAPN11	2	184	185	4	0.377041
SLCO6A1	2	184	185	4	0.377041
ZNF202	2	184	185	4	0.377041
COL2A1	2	184	185	4	0.377041
ATP5J2-PTCD1	2	184	185	4	0.377041
ARHGEF4	2	184	185	4	0.377041
ZHX2	2	184	185	4	0.377041
PCK1	2	184	185	4	0.377041
BCL11B	2	184	185	4	0.377041
FAM129B	2	184	185	4	0.377041
BRSK2	2	184	185	4	0.377041
LCP2	2	184	185	4	0.377041
SEMA7A	2	184	185	4	0.377041
OR5H14	2	184	185	4	0.377041
AOX1	2	184	185	4	0.377041
ZNF85	2	184	185	4	0.377041
ZNF385D	2	184	185	4	0.377041
SCN4A	2	184	185	4	0.377041
ZNF185	2	184	185	4	0.377041
AFF1	2	184	185	4	0.377041
ARHGEF26	2	184	185	4	0.377041
ARHGAP22	2	184	185	4	0.377041
FRMPD2	2	184	185	4	0.377041
TACR3	2	184	185	4	0.377041
GRM5	2	184	185	4	0.377041
PDE11A	2	184	185	4	0.377041
PSD4	2	184	185	4	0.377041
HEG1	2	184	185	4	0.377041
ARAP1	2	184	185	4	0.377041
SIGLEC9	2	184	185	4	0.377041
KIAA0146	2	184	185	4	0.377041
PKP4	2	184	185	4	0.377041
SNX8	2	184	185	4	0.377041
PLCB3	2	184	185	4	0.377041
ZNF451	2	184	185	4	0.377041
FAM124B	2	184	185	4	0.377041
DOT1L	2	184	185	4	0.377041
TRIOBP	2	184	185	4	0.377041
SIRPB1	2	184	185	4	0.377041
PLCE1	2	184	185	4	0.377041
MAP3K4	2	184	185	4	0.377041
CCDC108	2	184	185	4	0.377041
NLRP1	2	184	185	4	0.377041
SCN2A	2	184	185	4	0.377041
GPR116	2	184	185	4	0.377041
FOXK1	2	184	185	4	0.377041
MYO15A	2	184	185	4	0.377041
C2CD4C	2	184	185	4	0.377041
KRTAP29-1	2	184	185	4	0.377041
CSPG4	2	184	185	4	0.377041
LBP	2	184	185	4	0.377041
CCNB3	2	184	185	4	0.377041
GBP2	2	184	185	4	0.377041
TRIM41	2	184	185	4	0.377041
OR10H1	2	184	185	4	0.377041
LPIN3	2	184	185	4	0.377041
ADCY3	2	184	185	4	0.377041
KIF14	2	184	185	4	0.377041
OR10T2	2	184	185	4	0.377041
CCBE1	2	184	185	4	0.377041
TRPV3	2	184	185	4	0.377041
ASTL	2	184	185	4	0.377041
MYH6	2	184	185	4	0.377041
RAI1	2	184	185	4	0.377041
OSBPL6	2	184	185	4	0.377041
QSER1	2	184	185	4	0.377041
PLA2G4D	2	184	185	4	0.377041
NUP205	2	184	185	4	0.377041
OAS1	2	184	185	4	0.377041
CLEC4F	2	184	185	4	0.377041
F8	2	184	185	4	0.377041
GPAM	2	184	185	4	0.377041
HHIP	2	184	185	4	0.377041
UBE2N	2	184	185	4	0.377041
OR2M7	2	184	185	4	0.377041
CD22	2	184	185	4	0.377041
LY75	2	184	185	4	0.377041
FAM179B	2	184	185	4	0.377041
DPP3	2	184	185	4	0.377041
FHAD1	2	184	185	4	0.377041
CHD1L	2	184	185	4	0.377041
ASH1L	2	184	185	4	0.377041
SLITRK3	2	184	185	4	0.377041
PCDHB2	2	184	185	4	0.377041
ZNF135	2	184	185	4	0.377041
KCNK9	2	184	185	4	0.377041
GPR114	2	184	185	4	0.377041
NUP153	2	184	185	4	0.377041
HMGCR	2	184	185	4	0.377041
PLEKHA6	2	184	185	4	0.377041
LPIN2	2	184	185	4	0.377041
PTK2B	2	184	185	4	0.377041
CEP104	2	184	185	4	0.377041
PLA2G4C	2	184	185	4	0.377041
JAK2	2	184	185	4	0.377041
BCAN	2	184	185	4	0.377041
GRM7	2	184	185	4	0.377041
SARDH	2	184	185	4	0.377041
FAM179A	2	184	185	4	0.377041
HIVEP3	2	184	185	4	0.377041
HELZ	2	184	185	4	0.377041
SPATA16	2	184	185	4	0.377041
TPH2	2	184	185	4	0.377041
TBCCD1	2	184	185	4	0.377041
SUV420H1	2	184	185	4	0.377041
ABCA8	2	184	185	4	0.377041
NACAD	2	184	185	4	0.377041
TRIO	2	184	185	4	0.377041
SEC31B	2	184	185	4	0.377041
NLRC4	2	184	185	4	0.377041
NMBR	2	184	185	4	0.377041
SESN2	2	184	185	4	0.377041
ZHX1	2	184	185	4	0.377041
PYHIN1	2	184	185	4	0.377041
CRHR1	2	184	185	4	0.377041
PHF21B	2	184	185	4	0.377041
ANKIB1	2	184	185	4	0.377041
LOXL4	2	184	185	4	0.377041
KIAA1549L	2	184	185	4	0.377041
ARMC9	2	184	185	4	0.377041
SLC12A7	2	184	185	4	0.377041
ATP12A	2	184	185	4	0.377041
POM121L2	2	184	185	4	0.377041
C2orf62	2	184	185	4	0.377041
TMC7	2	184	185	4	0.377041
CEP63	2	184	185	4	0.377041
TOPORS	2	184	185	4	0.377041
EXOC6B	2	184	185	4	0.377041
KIAA1324L	2	184	185	4	0.377041
OR12D3	2	184	185	4	0.377041
PLXNA2	2	184	185	4	0.377041
GPR179	2	184	185	4	0.377041
TNS3	2	184	185	4	0.377041
SLC18A2	2	184	185	4	0.377041
ADCY5	2	184	185	4	0.377041
FCRL1	2	184	185	4	0.377041
ATP2C2	2	184	185	4	0.377041
EEA1	2	184	185	4	0.377041
IKZF1	2	184	185	4	0.377041
GLE1	2	184	185	4	0.377041
POLR2B	2	184	185	4	0.377041
EZR	2	184	185	4	0.377041
SNRK	2	184	185	4	0.377041
KIF5A	2	184	185	4	0.377041
BRWD3	2	184	185	4	0.377041
EHHADH	2	184	185	4	0.377041
POU6F2	2	184	185	4	0.377041
ZNF687	2	184	185	4	0.377041
EP400	2	184	185	4	0.377041
DEPDC5	2	184	185	4	0.377041
OPLAH	2	184	185	4	0.377041
MAGI2	2	184	185	4	0.377041
KRT27	2	184	185	4	0.377041
CORIN	2	184	185	4	0.377041
BIRC8	2	184	185	4	0.377041
RASGRP4	2	184	185	4	0.377041
CEP164	3	184	185	3	0.12297
BLM	3	184	185	3	0.12297
PCDHA1	3	184	185	3	0.12297
UBQLN3	3	184	185	3	0.12297
EHBP1L1	3	184	185	3	0.12297
MGAT5	3	184	185	3	0.12297
GRIN2D	3	184	185	3	0.12297
KIAA1328	3	184	185	3	0.12297
THBS3	3	184	185	3	0.12297
STEAP4	3	184	185	3	0.12297
MYO16	3	184	185	3	0.12297
PHF20	3	184	185	3	0.12297
AP1G1	3	184	185	3	0.12297
ITGB2	3	184	185	3	0.12297
GPI	3	184	185	3	0.12297
FCGR3B	3	184	185	3	0.12297
CSRNP1	3	184	185	3	0.12297
GABRA3	3	184	185	3	0.12297
C5orf22	3	184	185	3	0.12297
OSR1	3	184	185	3	0.12297
CXorf22	3	184	185	3	0.12297
TRIM71	3	184	185	3	0.12297
POU3F4	3	184	185	3	0.12297
CARD8	3	184	185	3	0.12297
INTS8	3	184	185	3	0.12297
CCNF	3	184	185	3	0.12297
GOLGB1	3	184	185	3	0.12297
GTF3C3	3	184	185	3	0.12297
G3BP2	3	184	185	3	0.12297
GAL	3	184	185	3	0.12297
POLD1	3	184	185	3	0.12297
FRS3	3	184	185	3	0.12297
BACE2	3	184	185	3	0.12297
MAST1	3	184	185	3	0.12297
OGFRL1	3	184	185	3	0.12297
SLC2A4RG	3	184	185	3	0.12297
SALL2	3	184	185	3	0.12297
CALR	3	184	185	3	0.12297
SLC5A11	3	184	185	3	0.12297
PDGFD	3	184	185	3	0.12297
SLC6A4	3	184	185	3	0.12297
DOCK8	3	184	185	3	0.12297
KCNA2	3	184	185	3	0.12297
STK33	3	184	185	3	0.12297
MARS	3	184	185	3	0.12297
RPE65	3	184	185	3	0.12297
KPNA7	3	184	185	3	0.12297
BAG4	3	184	185	3	0.12297
HTATSF1	3	184	185	3	0.12297
TTC13	3	184	185	3	0.12297
SPATA5L1	3	184	185	3	0.12297
CLEC14A	3	184	185	3	0.12297
MED13L	3	184	185	3	0.12297
LOC100132247	3	184	185	3	0.12297
CCDC105	3	184	185	3	0.12297
SYT3	3	184	185	3	0.12297
HSPA5	3	184	185	3	0.12297
CD177	3	184	185	3	0.12297
EWSR1	3	184	185	3	0.12297
C7orf43	3	184	185	3	0.12297
GPR148	3	184	185	3	0.12297
CCDC53	3	184	185	3	0.12297
NOP56	3	184	185	3	0.12297
NFASC	3	184	185	3	0.12297
MLXIP	3	184	185	3	0.12297
KIF1A	3	184	185	3	0.12297
MAPKBP1	3	184	185	3	0.12297
MEX3C	3	184	185	3	0.12297
MELK	3	184	185	3	0.12297
EPHA2	3	184	185	3	0.12297
MFSD1	3	184	185	3	0.12297
TMEM79	3	184	185	3	0.12297
TTI2	3	184	185	3	0.12297
PTPN23	3	184	185	3	0.12297
MGAT5B	3	184	185	3	0.12297
ADAMTS10	3	184	185	3	0.12297
PAM	3	184	185	3	0.12297
MYO1C	3	184	185	3	0.12297
SLC41A3	3	184	185	3	0.12297
PCDH19	3	184	185	3	0.12297
DEK	3	184	185	3	0.12297
GTSE1	3	184	185	3	0.12297
ZNF132	3	184	185	3	0.12297
PTPRH	3	184	185	3	0.12297
MMP13	3	184	185	3	0.12297
KRT83	3	184	185	3	0.12297
WDR26	3	184	185	3	0.12297
RHPN1	3	184	185	3	0.12297
BTN3A1	3	184	185	3	0.12297
APCDD1	3	184	185	3	0.12297
CDK14	3	184	185	3	0.12297
SPATA20	3	184	185	3	0.12297
ATP8B3	3	184	185	3	0.12297
RAD54L2	3	184	185	3	0.12297
ZNF479	3	184	185	3	0.12297
ZNF486	3	184	185	3	0.12297
KIAA0232	3	184	185	3	0.12297
SLC15A2	3	184	185	3	0.12297
IDH1	3	184	185	3	0.12297
PEG10	3	184	185	3	0.12297
CHN2	3	184	185	3	0.12297
SIM2	3	184	185	3	0.12297
GPR123	3	184	185	3	0.12297
AHR	3	184	185	3	0.12297
ZNF611	3	184	185	3	0.12297
HNRNPL	3	184	185	3	0.12297
PALM2-AKAP2	3	184	185	3	0.12297
OR5L2	3	184	185	3	0.12297
CLEC1B	3	184	185	3	0.12297
TRIM58	3	184	185	3	0.12297
CYP4A22	3	184	185	3	0.12297
IL1R1	3	184	185	3	0.12297
ZGPAT	3	184	185	3	0.12297
TGFB2	3	184	185	3	0.12297
SNW1	3	184	185	3	0.12297
STBD1	3	184	185	3	0.12297
PLA2G3	3	184	185	3	0.12297
FURIN	3	184	185	3	0.12297
CEP135	3	184	185	3	0.12297
TNRC6C	3	184	185	3	0.12297
DGCR14	3	184	185	3	0.12297
PRTG	3	184	185	3	0.12297
CNST	3	184	185	3	0.12297
RECQL	3	184	185	3	0.12297
TYR	3	184	185	3	0.12297
OR2AG2	3	184	185	3	0.12297
MCOLN2	3	184	185	3	0.12297
PIK3CD	3	184	185	3	0.12297
CUL7	3	184	185	3	0.12297
GRIN1	3	184	185	3	0.12297
SERPINE2	3	184	185	3	0.12297
POM121L12	3	184	185	3	0.12297
SLCO3A1	3	184	185	3	0.12297
DACT1	3	184	185	3	0.12297
EXTL3	3	184	185	3	0.12297
LAMC2	3	184	185	3	0.12297
RGS20	3	184	185	3	0.12297
FNDC7	3	184	185	3	0.12297
ERCC6	3	184	185	3	0.12297
NEBL	3	184	185	3	0.12297
KCNA7	3	184	185	3	0.12297
TTC14	3	184	185	3	0.12297
HNRNPCL1	3	184	185	3	0.12297
EXOC3	3	184	185	3	0.12297
MFSD2B	3	184	185	3	0.12297
TMC2	3	184	185	3	0.12297
LTK	3	184	185	3	0.12297
MLLT1	3	184	185	3	0.12297
SLFN11	3	184	185	3	0.12297
ATP13A3	3	184	185	3	0.12297
IPO13	3	184	185	3	0.12297
GDAP2	3	184	185	3	0.12297
TCF7	0	184	185	3	0.124997
ZFP36	0	184	185	3	0.124997
CASC5	0	184	185	3	0.124997
DNAJB6	0	184	185	3	0.124997
JAK1	0	184	185	3	0.124997
KIAA1751	0	184	185	3	0.124997
ROBO4	0	184	185	3	0.124997
KLHL2	0	184	185	3	0.124997
GNL2	0	184	185	3	0.124997
GDF5	0	184	185	3	0.124997
[truncated: 9,690 more rows]
