# Supplementary material for: A human-specific switch of alternatively spliced AFMID isoforms contributes to TP53 mutations and tumor recurrence in hepatocellular carcinoma
Source: HighWire-hosted journal article supplement (doi:10.1101/gr.227181.117), 2018-02-15
Supplement: Supplemental_Table_S7.xlsx [file Supplemental_Table_S7.xlsx]

## Sheet: Table S7
Table S7. Enrichment results for non-silent mutations in Q1 or Q4
Gene Symbol	Number of mutated HCCs in Q1	Number of Q1	Number of Q4	Number of mutated HCCs	Hypergeometric p-value
CTNNB1	16	93	93	31	0.152776
TTN	11	93	93	28	0.0774863
TP53	6	93	93	26	0.00201048
OBSCN	5	93	93	14	0.121312
MUC16	6	93	93	13	0.216555
APOB	7	93	93	12	0.197626
CSMD3	3	93	93	10	0.115138
RYR2	3	93	93	10	0.115138
HMCN1	6	93	93	9	0.163972
FLG	4	93	93	9	0.251548
CACNA1E	5	93	93	9	0.251548
DMD	4	93	93	9	0.251548
DNAH6	5	93	93	9	0.251548
ARID1A	1	93	93	8	0.0288862
USH2A	2	93	93	8	0.106912
SPTA1	5	93	93	8	0.221114
DCHS2	4	93	93	8	0.279498
VCAN	4	93	93	8	0.279498
CUL9	6	93	93	7	0.0520035
NEB	2	93	93	7	0.163102
CSMD1	5	93	93	7	0.163102
GLI2	5	93	93	7	0.163102
ROBO1	5	93	93	7	0.163102
FBN2	4	93	93	7	0.277945
LRRIQ1	4	93	93	7	0.277945
ABCA13	3	93	93	7	0.277945
CCDC168	3	93	93	7	0.277945
LRP1B	4	93	93	7	0.277945
DNAH9	4	93	93	7	0.277945
WDR17	5	93	93	6	0.0911749
DMBT1	5	93	93	6	0.0911749
SYNE2	1	93	93	6	0.0911749
FAT2	5	93	93	6	0.0911749
FBN1	4	93	93	6	0.235621
DNAH2	4	93	93	6	0.235621
AHNAK2	4	93	93	6	0.235621
MLL2	4	93	93	6	0.235621
FCGBP	4	93	93	6	0.235621
MUC4	2	93	93	6	0.235621
CRB1	4	93	93	6	0.235621
XIRP2	2	93	93	6	0.235621
GPR98	4	93	93	6	0.235621
HTT	4	93	93	6	0.235621
BAP1	4	93	93	6	0.235621
PCLO	4	93	93	6	0.235621
BIRC6	4	93	93	6	0.235621
AKAP13	4	93	93	6	0.235621
CHL1	4	93	93	6	0.235621
ALB	2	93	93	6	0.235621
MLL3	3	93	93	6	0.317651
TPO	3	93	93	6	0.317651
PKHD1L1	3	93	93	6	0.317651
FAT3	3	93	93	6	0.317651
PRKDC	3	93	93	6	0.317651
PTPRQ	3	93	93	6	0.317651
HYDIN	3	93	93	6	0.317651
ZNF469	3	93	93	6	0.317651
SVEP1	3	93	93	6	0.317651
PIK3CA	3	93	93	6	0.317651
ABCA4	3	93	93	6	0.317651
TG	0	93	93	5	0.0295747
DNAH10	0	93	93	5	0.0295747
HECW2	4	93	93	5	0.154519
CAND1	4	93	93	5	0.154519
DCHS1	1	93	93	5	0.154519
KIF19	4	93	93	5	0.154519
RYR3	4	93	93	5	0.154519
MYH4	4	93	93	5	0.154519
PCDHA5	4	93	93	5	0.154519
COL12A1	1	93	93	5	0.154519
CUBN	4	93	93	5	0.154519
DYNC2H1	4	93	93	5	0.154519
KNTC1	3	93	93	5	0.315906
ATM	3	93	93	5	0.315906
GRXCR1	2	93	93	5	0.315906
DNHD1	2	93	93	5	0.315906
LAMA1	2	93	93	5	0.315906
VWDE	2	93	93	5	0.315906
PREX2	2	93	93	5	0.315906
KEAP1	2	93	93	5	0.315906
ADAMTS18	2	93	93	5	0.315906
DIDO1	2	93	93	5	0.315906
CLSTN2	2	93	93	5	0.315906
ASXL1	2	93	93	5	0.315906
PXDNL	2	93	93	5	0.315906
ITGA10	2	93	93	5	0.315906
CELSR1	2	93	93	5	0.315906
MECOM	3	93	93	5	0.315906
NLRP3	2	93	93	5	0.315906
MXRA5	2	93	93	5	0.315906
MYO10	2	93	93	5	0.315906
DNAH8	2	93	93	5	0.315906
DNAH1	3	93	93	5	0.315906
SEMA3A	3	93	93	5	0.315906
ATP9A	2	93	93	5	0.315906
ASPM	2	93	93	5	0.315906
PLCB1	2	93	93	5	0.315906
COL6A6	3	93	93	5	0.315906
PTPN13	2	93	93	5	0.315906
PYGM	3	93	93	5	0.315906
CPS1	2	93	93	5	0.315906
ACAD11	0	93	93	4	0.0604785
SHANK2	4	93	93	4	0.0604785
LAMA3	4	93	93	4	0.0604785
KIAA1210	4	93	93	4	0.0604785
FAM47A	4	93	93	4	0.0604785
LRRK2	0	93	93	4	0.0604785
GRIA2	4	93	93	4	0.0604785
DSEL	0	93	93	4	0.0604785
ATP8A2	4	93	93	4	0.0604785
SLIT2	4	93	93	4	0.0604785
BSN	0	93	93	4	0.0604785
WDR87	0	93	93	4	0.0604785
EFCAB13	3	93	93	4	0.249978
COL6A3	1	93	93	4	0.249978
MYH7	3	93	93	4	0.249978
CELSR2	3	93	93	4	0.249978
SLC9C2	1	93	93	4	0.249978
LDB3	3	93	93	4	0.249978
ZNF20	3	93	93	4	0.249978
FRAS1	1	93	93	4	0.249978
PC	3	93	93	4	0.249978
SPTBN1	1	93	93	4	0.249978
TAF1	1	93	93	4	0.249978
L3MBTL3	1	93	93	4	0.249978
FER1L5	1	93	93	4	0.249978
TRPA1	1	93	93	4	0.249978
RP1	3	93	93	4	0.249978
EVPL	1	93	93	4	0.249978
CHD4	1	93	93	4	0.249978
ZNF676	3	93	93	4	0.249978
ANKRD26	1	93	93	4	0.249978
C16orf96	3	93	93	4	0.249978
DMXL1	1	93	93	4	0.249978
SDK1	1	93	93	4	0.249978
MMP16	3	93	93	4	0.249978
SCN10A	3	93	93	4	0.249978
NCOA6	3	93	93	4	0.249978
NOS1	1	93	93	4	0.249978
ANKHD1	1	93	93	4	0.249978
CNOT1	1	93	93	4	0.249978
CNTNAP2	1	93	93	4	0.249978
MDN1	3	93	93	4	0.249978
USP48	3	93	93	4	0.249978
HIVEP1	1	93	93	4	0.249978
SAGE1	1	93	93	4	0.249978
CD109	1	93	93	4	0.249978
ZNF28	1	93	93	4	0.249978
SETD1A	3	93	93	4	0.249978
IL18RAP	1	93	93	4	0.249978
A1BG	3	93	93	4	0.249978
COL5A2	1	93	93	4	0.249978
PLXNA4	1	93	93	4	0.249978
UBR4	3	93	93	4	0.249978
POLQ	1	93	93	4	0.249978
LRP1	1	93	93	4	0.249978
NBEA	1	93	93	4	0.249978
SMARCA4	1	93	93	4	0.249978
MYOF	1	93	93	4	0.249978
IDH2	3	93	93	4	0.249978
ABCA12	3	93	93	4	0.249978
LRIG2	1	93	93	4	0.249978
TEK	1	93	93	4	0.249978
REV3L	1	93	93	4	0.249978
TNRC6B	3	93	93	4	0.249978
KCNB2	3	93	93	4	0.249978
MLL	1	93	93	4	0.249978
THSD7A	3	93	93	4	0.249978
ACVR2A	3	93	93	4	0.249978
SEZ6L	3	93	93	4	0.249978
ADAMTSL1	1	93	93	4	0.249978
PDE4DIP	3	93	93	4	0.249978
DENND5B	3	93	93	4	0.249978
FHOD3	3	93	93	4	0.249978
DBN1	3	93	93	4	0.249978
SALL1	3	93	93	4	0.249978
CLTCL1	1	93	93	4	0.249978
MAGEL2	3	93	93	4	0.249978
ZNF638	3	93	93	4	0.249978
TDRD5	2	93	93	4	0.379087
SDK2	2	93	93	4	0.379087
CNTNAP4	2	93	93	4	0.379087
TRPM2	2	93	93	4	0.379087
DYNC1H1	2	93	93	4	0.379087
BAZ2B	2	93	93	4	0.379087
PCDH15	2	93	93	4	0.379087
CHD6	2	93	93	4	0.379087
SLC25A12	2	93	93	4	0.379087
PDE1C	2	93	93	4	0.379087
UNC79	2	93	93	4	0.379087
DSCAM	2	93	93	4	0.379087
ABCA1	2	93	93	4	0.379087
GCN1L1	2	93	93	4	0.379087
UNC13C	2	93	93	4	0.379087
ZNF831	2	93	93	4	0.379087
CPAMD8	2	93	93	4	0.379087
FAM186A	2	93	93	4	0.379087
FAM46D	2	93	93	4	0.379087
ADAM12	2	93	93	4	0.379087
PRDM2	2	93	93	4	0.379087
ULK2	2	93	93	4	0.379087
ATP12A	2	93	93	4	0.379087
ADNP2	2	93	93	4	0.379087
PLCB4	2	93	93	4	0.379087
ATAD2	2	93	93	4	0.379087
ARID2	2	93	93	4	0.379087
PHLDB2	2	93	93	4	0.379087
LRRK1	2	93	93	4	0.379087
SPEN	2	93	93	4	0.379087
JAK2	2	93	93	4	0.379087
LRP4	2	93	93	4	0.379087
JARID2	2	93	93	4	0.379087
DNAH7	2	93	93	4	0.379087
UNC80	2	93	93	4	0.379087
EIF4G2	2	93	93	4	0.379087
ITGA9	2	93	93	4	0.379087
MUC2	2	93	93	4	0.379087
SRCAP	2	93	93	4	0.379087
FLNB	2	93	93	4	0.379087
TP53BP2	2	93	93	4	0.379087
GLI3	2	93	93	4	0.379087
MYT1L	2	93	93	4	0.379087
MLL5	2	93	93	4	0.379087
ARMC9	2	93	93	4	0.379087
DNAH14	2	93	93	4	0.379087
CARD11	2	93	93	4	0.379087
KAT6B	2	93	93	4	0.379087
TTC40	2	93	93	4	0.379087
EVC2	2	93	93	4	0.379087
FBN3	2	93	93	4	0.379087
UBR2	2	93	93	4	0.379087
ZNF91	2	93	93	4	0.379087
THSD7B	2	93	93	4	0.379087
OR2M3	2	93	93	4	0.379087
SGCZ	2	93	93	4	0.379087
RANBP17	2	93	93	4	0.379087
DSCAML1	2	93	93	4	0.379087
FAM208B	0	93	93	3	0.122973
JHDM1D	3	93	93	3	0.122973
PCDHAC2	3	93	93	3	0.122973
CYLC1	0	93	93	3	0.122973
LCE1E	0	93	93	3	0.122973
HEATR5B	3	93	93	3	0.122973
ATP10A	3	93	93	3	0.122973
COPA	0	93	93	3	0.122973
AMER1	0	93	93	3	0.122973
ERCC6	3	93	93	3	0.122973
GNAS	3	93	93	3	0.122973
CTNND2	0	93	93	3	0.122973
NLGN4X	3	93	93	3	0.122973
FURIN	3	93	93	3	0.122973
EVX2	0	93	93	3	0.122973
IGF2R	3	93	93	3	0.122973
PIK3CD	3	93	93	3	0.122973
ITIH6	0	93	93	3	0.122973
OSR1	3	93	93	3	0.122973
SORCS3	0	93	93	3	0.122973
LCMT2	0	93	93	3	0.122973
KCNQ3	3	93	93	3	0.122973
TEX15	0	93	93	3	0.122973
MACF1	3	93	93	3	0.122973
SP3	3	93	93	3	0.122973
EPHB2	3	93	93	3	0.122973
XDH	0	93	93	3	0.122973
GPHN	0	93	93	3	0.122973
SLC26A11	0	93	93	3	0.122973
CHST3	0	93	93	3	0.122973
INSRR	3	93	93	3	0.122973
CEP164	3	93	93	3	0.122973
AUTS2	0	93	93	3	0.122973
RB1	3	93	93	3	0.122973
NES	3	93	93	3	0.122973
WDR96	0	93	93	3	0.122973
IRS4	3	93	93	3	0.122973
SPEF2	0	93	93	3	0.122973
SPATA31C1	0	93	93	3	0.122973
ABCC8	0	93	93	3	0.122973
ZNF536	0	93	93	3	0.122973
SEMA3D	0	93	93	3	0.122973
CNTLN	0	93	93	3	0.122973
ZC3H7A	0	93	93	3	0.122973
NFASC	3	93	93	3	0.122973
DMXL2	0	93	93	3	0.122973
COBL	0	93	93	3	0.122973
IQSEC3	3	93	93	3	0.122973
EPHA3	0	93	93	3	0.122973
TGFBRAP1	0	93	93	3	0.122973
PCDHA6	3	93	93	3	0.122973
TRIP12	0	93	93	3	0.122973
KCTD8	0	93	93	3	0.122973
CNTRL	3	93	93	3	0.122973
ITGAD	0	93	93	3	0.122973
MAB21L1	3	93	93	3	0.122973
TECTA	0	93	93	3	0.122973
NYNRIN	3	93	93	3	0.122973
PRKD2	3	93	93	3	0.122973
PLCG2	3	93	93	3	0.122973
BCORL1	0	93	93	3	0.122973
SPTB	3	93	93	3	0.122973
UNKL	0	93	93	3	0.122973
PRPF40A	0	93	93	3	0.122973
HIVEP2	0	93	93	3	0.122973
NOTCH3	0	93	93	3	0.122973
PDE3A	3	93	93	3	0.122973
FREM1	3	93	93	3	0.122973
ITGAV	0	93	93	3	0.122973
AKAP4	0	93	93	3	0.122973
ITPR3	3	93	93	3	0.122973
ZNF470	0	93	93	3	0.122973
MKI67	3	93	93	3	0.122973
SENP6	0	93	93	3	0.122973
SLC39A8	0	93	93	3	0.122973
SETX	0	93	93	3	0.122973
NXPE3	0	93	93	3	0.122973
BRCA1	0	93	93	3	0.122973
FMN1	0	93	93	3	0.122973
NOD2	3	93	93	3	0.122973
ALMS1	0	93	93	3	0.122973
DOCK2	0	93	93	3	0.122973
ARHGAP39	0	93	93	3	0.122973
COL7A1	0	93	93	3	0.122973
SERPINE2	3	93	93	3	0.122973
CEP97	3	93	93	3	0.122973
FARP1	3	93	93	3	0.122973
ZFP28	0	93	93	3	0.122973
SPAG6	3	93	93	3	0.122973
PDCD11	0	93	93	3	0.122973
LCT	0	93	93	3	0.122973
DENND3	3	93	93	3	0.122973
CADM1	3	93	93	3	0.122973
CHSY3	3	93	93	3	0.122973
LDOC1L	3	93	93	3	0.122973
ATP2B2	0	93	93	3	0.122973
SYNE1	0	93	93	3	0.122973
ADAMTS10	3	93	93	3	0.122973
KLHL33	3	93	93	3	0.122973
SLC8A1	0	93	93	3	0.122973
KIAA0556	2	93	93	3	0.377027
42435	1	93	93	3	0.377027
FGA	1	93	93	3	0.377027
MEFV	1	93	93	3	0.377027
BDP1	2	93	93	3	0.377027
GIMAP8	1	93	93	3	0.377027
JAKMIP1	2	93	93	3	0.377027
BRD4	1	93	93	3	0.377027
CHD7	2	93	93	3	0.377027
PCDHB1	1	93	93	3	0.377027
CD22	1	93	93	3	0.377027
BAI3	1	93	93	3	0.377027
DCDC5	2	93	93	3	0.377027
SMEK1	2	93	93	3	0.377027
PIK3R2	1	93	93	3	0.377027
ASXL3	2	93	93	3	0.377027
ZNF318	2	93	93	3	0.377027
CFTR	1	93	93	3	0.377027
DYSF	1	93	93	3	0.377027
SAMD9	1	93	93	3	0.377027
STAB2	1	93	93	3	0.377027
TMC7	2	93	93	3	0.377027
DLK2	1	93	93	3	0.377027
DBC1	2	93	93	3	0.377027
PKD1L1	2	93	93	3	0.377027
HNRNPC	1	93	93	3	0.377027
CEP104	1	93	93	3	0.377027
FASN	2	93	93	3	0.377027
CYP11B2	1	93	93	3	0.377027
SLC9A6	2	93	93	3	0.377027
JMJD1C	1	93	93	3	0.377027
ZCCHC6	1	93	93	3	0.377027
TRIOBP	2	93	93	3	0.377027
NAV3	2	93	93	3	0.377027
KIF13A	1	93	93	3	0.377027
ACAT2	1	93	93	3	0.377027
TACC2	1	93	93	3	0.377027
42615	2	93	93	3	0.377027
NPAP1	2	93	93	3	0.377027
DCC	1	93	93	3	0.377027
OR2L13	1	93	93	3	0.377027
IL31RA	2	93	93	3	0.377027
KIAA1109	1	93	93	3	0.377027
VWA5B2	2	93	93	3	0.377027
CDH9	2	93	93	3	0.377027
CHRNA4	1	93	93	3	0.377027
PLA2G4A	1	93	93	3	0.377027
RAI14	1	93	93	3	0.377027
OR10G7	1	93	93	3	0.377027
PPP3CA	1	93	93	3	0.377027
ANKRD17	2	93	93	3	0.377027
BICD1	2	93	93	3	0.377027
HECTD4	1	93	93	3	0.377027
PCDHGB7	1	93	93	3	0.377027
GRM3	2	93	93	3	0.377027
MDC1	1	93	93	3	0.377027
USP24	1	93	93	3	0.377027
IGF1R	1	93	93	3	0.377027
MUC5B	1	93	93	3	0.377027
OR2T27	1	93	93	3	0.377027
LAMC1	2	93	93	3	0.377027
NCKAP5	2	93	93	3	0.377027
IL12A	1	93	93	3	0.377027
KIT	2	93	93	3	0.377027
GPATCH8	1	93	93	3	0.377027
FLG2	2	93	93	3	0.377027
NEK9	2	93	93	3	0.377027
THEMIS	2	93	93	3	0.377027
FCRL1	2	93	93	3	0.377027
MME	1	93	93	3	0.377027
PTPN22	1	93	93	3	0.377027
ZNF423	1	93	93	3	0.377027
HNRNPH1	2	93	93	3	0.377027
GRIA4	1	93	93	3	0.377027
CILP2	1	93	93	3	0.377027
PLXNB3	2	93	93	3	0.377027
MYO5A	1	93	93	3	0.377027
FAM5B	1	93	93	3	0.377027
CCSER1	2	93	93	3	0.377027
BDKRB2	1	93	93	3	0.377027
SEMA6D	2	93	93	3	0.377027
KDR	2	93	93	3	0.377027
ITIH4	1	93	93	3	0.377027
FAM160A1	1	93	93	3	0.377027
TERF1	2	93	93	3	0.377027
PCDHGA10	1	93	93	3	0.377027
RNF123	2	93	93	3	0.377027
AP3B2	1	93	93	3	0.377027
SPECC1	1	93	93	3	0.377027
PTPRC	1	93	93	3	0.377027
DNAH3	1	93	93	3	0.377027
ADAMTS20	1	93	93	3	0.377027
FNDC1	2	93	93	3	0.377027
EIF4G3	1	93	93	3	0.377027
IL21R	1	93	93	3	0.377027
PDZRN4	1	93	93	3	0.377027
LTBP1	1	93	93	3	0.377027
SND1	1	93	93	3	0.377027
GIN1	1	93	93	3	0.377027
PXDN	2	93	93	3	0.377027
TACR3	2	93	93	3	0.377027
TMEM132B	2	93	93	3	0.377027
TLX3	2	93	93	3	0.377027
ITPR1	1	93	93	3	0.377027
GAS2L2	2	93	93	3	0.377027
LRRC69	1	93	93	3	0.377027
COL4A2	1	93	93	3	0.377027
TCHH	2	93	93	3	0.377027
DOCK10	2	93	93	3	0.377027
CTTNBP2	2	93	93	3	0.377027
LCP2	1	93	93	3	0.377027
PCDHB2	2	93	93	3	0.377027
GRM8	1	93	93	3	0.377027
MAPK10	1	93	93	3	0.377027
ADCY3	1	93	93	3	0.377027
ZFPM2	1	93	93	3	0.377027
PCDHA13	1	93	93	3	0.377027
AOX1	2	93	93	3	0.377027
NUP153	2	93	93	3	0.377027
LILRB1	1	93	93	3	0.377027
ANKRD30B	1	93	93	3	0.377027
GPSM1	2	93	93	3	0.377027
NAAA	2	93	93	3	0.377027
PSMD1	1	93	93	3	0.377027
PHF3	2	93	93	3	0.377027
TMEM131	1	93	93	3	0.377027
POLR2A	1	93	93	3	0.377027
SLITRK5	1	93	93	3	0.377027
PKD1	1	93	93	3	0.377027
NRAP	2	93	93	3	0.377027
KDM2A	1	93	93	3	0.377027
GAD1	2	93	93	3	0.377027
TLE1	1	93	93	3	0.377027
COL4A4	1	93	93	3	0.377027
PREX1	1	93	93	3	0.377027
SPEG	2	93	93	3	0.377027
SRRM5	1	93	93	3	0.377027
DSE	1	93	93	3	0.377027
ACOX2	2	93	93	3	0.377027
ARHGEF4	2	93	93	3	0.377027
NXF3	2	93	93	3	0.377027
HERC1	2	93	93	3	0.377027
PRPF8	1	93	93	3	0.377027
ZFYVE16	2	93	93	3	0.377027
SNX15	2	93	93	3	0.377027
CDCA7	1	93	93	3	0.377027
NDST4	2	93	93	3	0.377027
MED12L	1	93	93	3	0.377027
IGDCC3	2	93	93	3	0.377027
SEC31B	1	93	93	3	0.377027
DSP	1	93	93	3	0.377027
MYH15	1	93	93	3	0.377027
PCDHA8	1	93	93	3	0.377027
FREM2	1	93	93	3	0.377027
HGS	1	93	93	3	0.377027
PTGR1	2	93	93	3	0.377027
ZFHX3	1	93	93	3	0.377027
STXBP5L	1	93	93	3	0.377027
TENM3	2	93	93	3	0.377027
TRPM8	1	93	93	3	0.377027
CADM2	2	93	93	3	0.377027
MPEG1	2	93	93	3	0.377027
IQUB	1	93	93	3	0.377027
ZFHX4	1	93	93	3	0.377027
HRNR	1	93	93	3	0.377027
PPIP5K2	1	93	93	3	0.377027
KRT1	2	93	93	3	0.377027
CREBBP	2	93	93	3	0.377027
PTEN	1	93	93	3	0.377027
OR51G1	1	93	93	3	0.377027
TRRAP	2	93	93	3	0.377027
ADCY8	1	93	93	3	0.377027
ELTD1	1	93	93	3	0.377027
ODF2	1	93	93	3	0.377027
ZNF716	2	93	93	3	0.377027
GRAMD1B	1	93	93	3	0.377027
PRSS16	2	93	93	3	0.377027
NEO1	2	93	93	3	0.377027
MAP1B	1	93	93	3	0.377027
EYS	1	93	93	3	0.377027
EPB41L3	1	93	93	3	0.377027
COL3A1	2	93	93	3	0.377027
KCNMA1	2	93	93	3	0.377027
PCDH9	1	93	93	3	0.377027
IKBKB	1	93	93	3	0.377027
CLCN1	2	93	93	3	0.377027
CSMD2	1	93	93	3	0.377027
FAM208A	2	93	93	3	0.377027
MLL4	1	93	93	3	0.377027
ELN	1	93	93	3	0.377027
ZNF311	2	93	93	3	0.377027
ITSN1	2	93	93	3	0.377027
YIF1B	2	93	93	3	0.377027
GRIP1	1	93	93	3	0.377027
ANKLE2	2	93	93	3	0.377027
ZNF208	1	93	93	3	0.377027
KIAA0947	2	93	93	3	0.377027
TRIP4	2	93	93	3	0.377027
POMT2	1	93	93	3	0.377027
NUP93	1	93	93	3	0.377027
ADAMTS7	2	93	93	3	0.377027
PLEC	1	93	93	3	0.377027
OPRM1	1	93	93	3	0.377027
NF1	1	93	93	3	0.377027
RAPGEF1	1	93	93	3	0.377027
BCLAF1	2	93	93	3	0.377027
PLEKHG1	1	93	93	3	0.377027
TNXB	2	93	93	3	0.377027
ZSWIM1	1	93	93	3	0.377027
PRICKLE1	1	93	93	3	0.377027
EIF4G1	1	93	93	3	0.377027
SEMA6C	2	93	93	3	0.377027
KTN1	2	93	93	3	0.377027
TENM4	2	93	93	3	0.377027
KCNK9	1	93	93	3	0.377027
TTC28	1	93	93	3	0.377027
KIAA1549	2	93	93	3	0.377027
SLC24A2	1	93	93	3	0.377027
SMC5	1	93	93	3	0.377027
DOCK1	2	93	93	3	0.377027
TIAM2	1	93	93	3	0.377027
BTAF1	2	93	93	3	0.377027
COL4A6	1	93	93	3	0.377027
ZNF804B	2	93	93	3	0.377027
PKHD1	1	93	93	3	0.377027
PGLYRP4	2	93	93	3	0.377027
KIAA1239	2	93	93	3	0.377027
OTOGL	2	93	93	3	0.377027
PLXNB1	2	93	93	3	0.377027
RAPH1	1	93	93	3	0.377027
ZFP37	1	93	93	3	0.377027
MCM3AP	1	93	93	3	0.377027
ANO9	1	93	93	3	0.377027
CDH18	1	93	93	3	0.377027
PBX1	1	93	93	3	0.377027
ARHGEF17	1	93	93	3	0.377027
KIF25	2	93	93	3	0.377027
DCAF6	2	93	93	3	0.377027
OSBPL6	1	93	93	3	0.377027
ZIM3	2	93	93	3	0.377027
GTF3C1	2	93	93	3	0.377027
ASAP2	1	93	93	3	0.377027
DEPDC5	1	93	93	3	0.377027
KCNH1	2	93	93	3	0.377027
HNF1A	2	93	93	3	0.377027
LRRC33	2	93	93	3	0.377027
AHNAK	1	93	93	3	0.377027
RPS6KA3	1	93	93	3	0.377027
DLEC1	1	93	93	3	0.377027
HDAC9	2	93	93	3	0.377027
FAM5C	2	93	93	3	0.377027
ZNF451	2	93	93	3	0.377027
SYCP2	1	93	93	3	0.377027
TNRC6A	1	93	93	3	0.377027
KIAA1244	1	93	93	3	0.377027
ELL2	1	93	93	3	0.377027
NLRX1	1	93	93	3	0.377027
RFC1	1	93	93	3	0.377027
PIKFYVE	2	93	93	3	0.377027
HEATR1	2	93	93	3	0.377027
ABCB5	2	93	93	3	0.377027
TMEM260	1	93	93	3	0.377027
PTPN9	2	93	93	3	0.377027
ZSWIM2	2	93	93	3	0.377027
GRM7	2	93	93	3	0.377027
ADCY5	1	93	93	3	0.377027
PCDHGA4	2	93	93	3	0.377027
ANKRD12	1	93	93	3	0.377027
ATP1A3	2	93	93	3	0.377027
SUV420H1	2	93	93	3	0.377027
ITGA7	2	93	93	3	0.377027
LAMA5	1	93	93	3	0.377027
ZNF534	1	93	93	3	0.377027
COBLL1	2	93	93	3	0.377027
NHSL1	1	93	93	3	0.377027
HEG1	2	93	93	3	0.377027
SASH1	2	93	93	3	0.377027
FSTL5	1	93	93	3	0.377027
RAB18	1	93	93	3	0.377027
ERC2	1	93	93	3	0.377027
PPFIA2	1	93	93	3	0.377027
ALPK2	2	93	93	3	0.377027
OR10Z1	2	93	93	3	0.377027
EHHADH	1	93	93	3	0.377027
GRIN2B	1	93	93	3	0.377027
MACC1	2	93	93	3	0.377027
LOXL4	1	93	93	3	0.377027
ZNF521	2	93	93	3	0.377027
FGR	2	93	93	3	0.377027
TRPM3	2	93	93	3	0.377027
GPR112	2	93	93	3	0.377027
AASDH	2	93	93	3	0.377027
CD163L1	1	93	93	3	0.377027
SLC30A1	2	93	93	3	0.377027
ALK	2	93	93	3	0.377027
OR2M7	1	93	93	3	0.377027
MPO	2	93	93	3	0.377027
PTK2B	1	93	93	3	0.377027
CACNA1B	1	93	93	3	0.377027
TBX18	1	93	93	3	0.377027
IL1RAPL2	2	93	93	3	0.377027
COL15A1	1	93	93	3	0.377027
COL22A1	2	93	93	3	0.377027
ABCC10	2	93	93	3	0.377027
SPAG17	2	93	93	3	0.377027
CLCA2	2	93	93	3	0.377027
USP19	2	93	93	3	0.377027
HSPG2	1	93	93	3	0.377027
RASA1	1	93	93	3	0.377027
SCN5A	1	93	93	3	0.377027
ZNF71	2	93	93	3	0.377027
PTPRB	2	93	93	3	0.377027
COL11A1	2	93	93	3	0.377027
SLC9C1	1	93	93	3	0.377027
ARHGAP31	1	93	93	3	0.377027
SCAPER	2	93	93	3	0.377027
CRIP3	1	93	93	3	0.377027
FBLN2	1	93	93	3	0.377027
ZNF331	2	93	93	3	0.377027
SHROOM4	1	93	93	3	0.377027
NRD1	1	93	93	3	0.377027
KIAA1614	2	93	93	3	0.377027
HELZ2	2	93	93	2	0.248649
SCN1A	2	93	93	2	0.248649
NAA16	2	93	93	2	0.248649
MYO9A	2	93	93	2	0.248649
GLYAT	0	93	93	2	0.248649
TNFRSF4	0	93	93	2	0.248649
SCN11A	0	93	93	2	0.248649
BCL9	2	93	93	2	0.248649
MYO1E	0	93	93	2	0.248649
LY75	0	93	93	2	0.248649
CUZD1	2	93	93	2	0.248649
CASP4	0	93	93	2	0.248649
NLRP1	0	93	93	2	0.248649
NUF2	0	93	93	2	0.248649
LMO7	0	93	93	2	0.248649
ATP1A2	0	93	93	2	0.248649
NLRP2	0	93	93	2	0.248649
WDR7	2	93	93	2	0.248649
PAN3	0	93	93	2	0.248649
CENPE	2	93	93	2	0.248649
SBF1	0	93	93	2	0.248649
EI24	0	93	93	2	0.248649
OR51D1	0	93	93	2	0.248649
PTPRM	0	93	93	2	0.248649
NCOA3	2	93	93	2	0.248649
MED13	0	93	93	2	0.248649
EZR	0	93	93	2	0.248649
GPRC6A	0	93	93	2	0.248649
DDN	0	93	93	2	0.248649
ACE	2	93	93	2	0.248649
TEX10	0	93	93	2	0.248649
SESN2	0	93	93	2	0.248649
ELAVL1	0	93	93	2	0.248649
AARS2	2	93	93	2	0.248649
NFATC2	0	93	93	2	0.248649
KCNJ14	0	93	93	2	0.248649
ASTN1	2	93	93	2	0.248649
OR5D13	0	93	93	2	0.248649
GLE1	2	93	93	2	0.248649
RFX3	0	93	93	2	0.248649
AP3S1	2	93	93	2	0.248649
TGM3	0	93	93	2	0.248649
PIK3C2B	2	93	93	2	0.248649
BRD2	0	93	93	2	0.248649
AIM1	0	93	93	2	0.248649
TSC2	0	93	93	2	0.248649
KLRC4-KLRK1	2	93	93	2	0.248649
LRRC28	0	93	93	2	0.248649
MSH5	0	93	93	2	0.248649
THADA	0	93	93	2	0.248649
GPRIN1	0	93	93	2	0.248649
SCN3A	2	93	93	2	0.248649
CXorf22	2	93	93	2	0.248649
PCDHAC1	0	93	93	2	0.248649
OR5T2	0	93	93	2	0.248649
ITPR2	2	93	93	2	0.248649
PTGER3	2	93	93	2	0.248649
SYT5	2	93	93	2	0.248649
SIRPB2	2	93	93	2	0.248649
ADAMTS2	2	93	93	2	0.248649
EPHB1	0	93	93	2	0.248649
SLFN13	2	93	93	2	0.248649
BOD1L1	2	93	93	2	0.248649
CNGA2	0	93	93	2	0.248649
BTBD19	2	93	93	2	0.248649
PRUNE2	2	93	93	2	0.248649
NCOA7	0	93	93	2	0.248649
ADAM29	2	93	93	2	0.248649
SUCO	2	93	93	2	0.248649
TRERF1	2	93	93	2	0.248649
RGPD4	0	93	93	2	0.248649
CDK5RAP2	2	93	93	2	0.248649
PARD3	2	93	93	2	0.248649
DENND4A	2	93	93	2	0.248649
CTNNA3	2	93	93	2	0.248649
PDZRN3	0	93	93	2	0.248649
CCDC14	0	93	93	2	0.248649
MAP4K5	0	93	93	2	0.248649
SMAD3	2	93	93	2	0.248649
ZNF777	0	93	93	2	0.248649
GPR124	0	93	93	2	0.248649
TLL1	0	93	93	2	0.248649
SORBS2	2	93	93	2	0.248649
TET1	0	93	93	2	0.248649
BAZ1A	2	93	93	2	0.248649
GRM5	2	93	93	2	0.248649
MLLT4	2	93	93	2	0.248649
STXBP3	2	93	93	2	0.248649
RNF213	2	93	93	2	0.248649
CCDC146	0	93	93	2	0.248649
CCNB3	2	93	93	2	0.248649
DEFB113	0	93	93	2	0.248649
CEACAM5	0	93	93	2	0.248649
MYBPC3	0	93	93	2	0.248649
EML4	2	93	93	2	0.248649
NT5C3A	2	93	93	2	0.248649
PCDHA2	0	93	93	2	0.248649
UTP15	2	93	93	2	0.248649
ZNF471	2	93	93	2	0.248649
ADCY2	2	93	93	2	0.248649
DOCK8	2	93	93	2	0.248649
N4BP2L2	0	93	93	2	0.248649
C20orf26	2	93	93	2	0.248649
SLC4A8	2	93	93	2	0.248649
PCDHB6	2	93	93	2	0.248649
SPTLC2	2	93	93	2	0.248649
IL9R	0	93	93	2	0.248649
CEP120	2	93	93	2	0.248649
GALNTL6	2	93	93	2	0.248649
JAG2	0	93	93	2	0.248649
SVIL	0	93	93	2	0.248649
ZBTB18	0	93	93	2	0.248649
TNN	2	93	93	2	0.248649
ATP10B	2	93	93	2	0.248649
TNS1	2	93	93	2	0.248649
CLK4	0	93	93	2	0.248649
FBXL7	0	93	93	2	0.248649
XIRP1	2	93	93	2	0.248649
KIAA1522	2	93	93	2	0.248649
ABCA6	0	93	93	2	0.248649
ST18	0	93	93	2	0.248649
RIMS1	2	93	93	2	0.248649
LPHN1	2	93	93	2	0.248649
TLR8	0	93	93	2	0.248649
KCNS1	0	93	93	2	0.248649
MLC1	0	93	93	2	0.248649
RAD54B	2	93	93	2	0.248649
CBX4	0	93	93	2	0.248649
VRTN	2	93	93	2	0.248649
GPRASP2	2	93	93	2	0.248649
NR4A2	2	93	93	2	0.248649
OGFRL1	2	93	93	2	0.248649
KIF21B	0	93	93	2	0.248649
ZFP82	2	93	93	2	0.248649
MSANTD3-TMEFF1	2	93	93	2	0.248649
HUWE1	0	93	93	2	0.248649
HSPA5	2	93	93	2	0.248649
DOT1L	0	93	93	2	0.248649
ILDR1	2	93	93	2	0.248649
CEP350	2	93	93	2	0.248649
ZNF429	0	93	93	2	0.248649
AGPAT1	0	93	93	2	0.248649
IGSF9B	2	93	93	2	0.248649
PDLIM3	0	93	93	2	0.248649
OLFM3	0	93	93	2	0.248649
IQGAP1	0	93	93	2	0.248649
PRMT1	0	93	93	2	0.248649
PCDH11X	2	93	93	2	0.248649
LCE1F	2	93	93	2	0.248649
HMGN5	2	93	93	2	0.248649
SLC45A4	2	93	93	2	0.248649
TBX2	2	93	93	2	0.248649
RPS6KA6	0	93	93	2	0.248649
ITGA11	2	93	93	2	0.248649
PTK2	0	93	93	2	0.248649
OR8J3	2	93	93	2	0.248649
PAPPA	2	93	93	2	0.248649
FHDC1	0	93	93	2	0.248649
CRB2	2	93	93	2	0.248649
ANXA3	2	93	93	2	0.248649
TIMP4	2	93	93	2	0.248649
AHCTF1	2	93	93	2	0.248649
PPP2R4	2	93	93	2	0.248649
PACSIN3	0	93	93	2	0.248649
RTKN2	0	93	93	2	0.248649
IKBIP	0	93	93	2	0.248649
SIGLEC10	0	93	93	2	0.248649
TJP2	0	93	93	2	0.248649
SLC22A8	0	93	93	2	0.248649
HTR2C	0	93	93	2	0.248649
GRIN3A	0	93	93	2	0.248649
STK31	0	93	93	2	0.248649
AMER3	0	93	93	2	0.248649
ROBO2	0	93	93	2	0.248649
KIF1A	2	93	93	2	0.248649
C9orf72	2	93	93	2	0.248649
CXorf58	0	93	93	2	0.248649
CASQ1	2	93	93	2	0.248649
KLHL15	2	93	93	2	0.248649
PPP1R15B	2	93	93	2	0.248649
GTF3C3	2	93	93	2	0.248649
RBM39	0	93	93	2	0.248649
GMIP	0	93	93	2	0.248649
DHX29	2	93	93	2	0.248649
KRTAP4-2	0	93	93	2	0.248649
PCNXL2	0	93	93	2	0.248649
MORC2	2	93	93	2	0.248649
NUP210L	0	93	93	2	0.248649
TNR	2	93	93	2	0.248649
CAP2	0	93	93	2	0.248649
ZNF518B	2	93	93	2	0.248649
ARHGEF2	2	93	93	2	0.248649
FLAD1	2	93	93	2	0.248649
COPS4	0	93	93	2	0.248649
LRP12	0	93	93	2	0.248649
CTC1	2	93	93	2	0.248649
CEP85L	0	93	93	2	0.248649
GLG1	0	93	93	2	0.248649
SLC6A4	2	93	93	2	0.248649
EGFR	2	93	93	2	0.248649
NPC1L1	2	93	93	2	0.248649
CD101	2	93	93	2	0.248649
LIPI	0	93	93	2	0.248649
CHD8	2	93	93	2	0.248649
PRKAA1	0	93	93	2	0.248649
HLA-E	2	93	93	2	0.248649
FCHO2	2	93	93	2	0.248649
ARHGAP35	0	93	93	2	0.248649
WNT6	0	93	93	2	0.248649
KIF24	2	93	93	2	0.248649
ATR	2	93	93	2	0.248649
SREBF2	0	93	93	2	0.248649
CNOT10	2	93	93	2	0.248649
GBP2	2	93	93	2	0.248649
DUSP22	2	93	93	2	0.248649
PUM1	0	93	93	2	0.248649
ARFIP1	0	93	93	2	0.248649
TAOK2	2	93	93	2	0.248649
DHX57	2	93	93	2	0.248649
WWC2	2	93	93	2	0.248649
MMP13	2	93	93	2	0.248649
MLXIP	2	93	93	2	0.248649
ROR2	2	93	93	2	0.248649
SP4	0	93	93	2	0.248649
GLT8D2	0	93	93	2	0.248649
THBS3	2	93	93	2	0.248649
OR4C6	2	93	93	2	0.248649
DUOX1	0	93	93	2	0.248649
ZNF841	0	93	93	2	0.248649
OXSR1	2	93	93	2	0.248649
ERCC6L	0	93	93	2	0.248649
ABCA10	0	93	93	2	0.248649
NCAPD3	0	93	93	2	0.248649
ARAF	2	93	93	2	0.248649
HTR7	2	93	93	2	0.248649
CTBP2	2	93	93	2	0.248649
CHMP5	0	93	93	2	0.248649
ADAMTS8	0	93	93	2	0.248649
TRPV3	0	93	93	2	0.248649
CHD1L	2	93	93	2	0.248649
RIPK3	0	93	93	2	0.248649
VWA3B	2	93	93	2	0.248649
ZCCHC2	0	93	93	2	0.248649
DNAJC1	2	93	93	2	0.248649
FARP2	2	93	93	2	0.248649
ESCO1	2	93	93	2	0.248649
MCF2	2	93	93	2	0.248649
PLEKHG4B	0	93	93	2	0.248649
SYT15	0	93	93	2	0.248649
CCT3	0	93	93	2	0.248649
LRBA	2	93	93	2	0.248649
HTR3C	2	93	93	2	0.248649
PLCH1	0	93	93	2	0.248649
DOCK3	2	93	93	2	0.248649
APPL1	2	93	93	2	0.248649
GPR148	2	93	93	2	0.248649
C19orf21	2	93	93	2	0.248649
KDM2B	0	93	93	2	0.248649
ZIC4	2	93	93	2	0.248649
ARHGEF15	2	93	93	2	0.248649
C12orf68	2	93	93	2	0.248649
EMR3	2	93	93	2	0.248649
TFE3	0	93	93	2	0.248649
USP6NL	2	93	93	2	0.248649
EP400	2	93	93	2	0.248649
CPN1	0	93	93	2	0.248649
MAP4	0	93	93	2	0.248649
INTS8	2	93	93	2	0.248649
SLC37A3	2	93	93	2	0.248649
CHRM3	0	93	93	2	0.248649
GPR179	2	93	93	2	0.248649
SCIN	0	93	93	2	0.248649
EPRS	2	93	93	2	0.248649
CCDC30	0	93	93	2	0.248649
TAS2R16	2	93	93	2	0.248649
FIG4	0	93	93	2	0.248649
PGM3	0	93	93	2	0.248649
MYOD1	0	93	93	2	0.248649
C15orf55	0	93	93	2	0.248649
FGD5	2	93	93	2	0.248649
OR2M5	2	93	93	2	0.248649
KY	0	93	93	2	0.248649
CEP135	2	93	93	2	0.248649
PROM1	0	93	93	2	0.248649
SULT2B1	2	93	93	2	0.248649
CXorf30	0	93	93	2	0.248649
TMEM5	2	93	93	2	0.248649
ACCS	0	93	93	2	0.248649
TTBK1	0	93	93	2	0.248649
ANKRD50	2	93	93	2	0.248649
JAK1	0	93	93	2	0.248649
AADAC	0	93	93	2	0.248649
ZBTB4	2	93	93	2	0.248649
NFRKB	2	93	93	2	0.248649
GCC1	0	93	93	2	0.248649
OR8H2	2	93	93	2	0.248649
ANKRD24	2	93	93	2	0.248649
PLOD2	2	93	93	2	0.248649
PHRF1	0	93	93	2	0.248649
COL4A5	2	93	93	2	0.248649
MBD1	0	93	93	2	0.248649
NR3C2	2	93	93	2	0.248649
OR6C4	0	93	93	2	0.248649
RUNX1T1	2	93	93	2	0.248649
KCNH6	2	93	93	2	0.248649
ZNF430	0	93	93	2	0.248649
ZNF347	0	93	93	2	0.248649
B4GALNT3	2	93	93	2	0.248649
IQCA1	0	93	93	2	0.248649
P4HA2	0	93	93	2	0.248649
EPHA7	2	93	93	2	0.248649
NR0B2	2	93	93	2	0.248649
LOC100132247	2	93	93	2	0.248649
CACNA2D4	0	93	93	2	0.248649
IL6	2	93	93	2	0.248649
DAZAP1	2	93	93	2	0.248649
PGR	0	93	93	2	0.248649
CLEC4F	2	93	93	2	0.248649
LIPA	2	93	93	2	0.248649
SZT2	0	93	93	2	0.248649
MST1	0	93	93	2	0.248649
SPI1	2	93	93	2	0.248649
AP1G1	2	93	93	2	0.248649
FMO2	0	93	93	2	0.248649
GLDC	2	93	93	2	0.248649
NCAM1	0	93	93	2	0.248649
ZNF577	0	93	93	2	0.248649
C1orf94	2	93	93	2	0.248649
ERRFI1	2	93	93	2	0.248649
TOP2B	0	93	93	2	0.248649
ARX	0	93	93	2	0.248649
AHR	2	93	93	2	0.248649
ZNF567	0	93	93	2	0.248649
APBB1	0	93	93	2	0.248649
IL17RD	0	93	93	2	0.248649
DDX5	2	93	93	2	0.248649
KIAA1033	0	93	93	2	0.248649
SNAI1	2	93	93	2	0.248649
OR2L5	0	93	93	2	0.248649
SIK3	0	93	93	2	0.248649
DGKE	0	93	93	2	0.248649
SCN9A	0	93	93	2	0.248649
EPHA8	0	93	93	2	0.248649
CEACAM18	0	93	93	2	0.248649
SPAG16	2	93	93	2	0.248649
DLC1	0	93	93	2	0.248649
EEPD1	2	93	93	2	0.248649
KLHL1	0	93	93	2	0.248649
KCNA2	2	93	93	2	0.248649
OR6C75	2	93	93	2	0.248649
ATP13A4	0	93	93	2	0.248649
SENP7	2	93	93	2	0.248649
SYT3	2	93	93	2	0.248649
WNK2	0	93	93	2	0.248649
FGFR2	0	93	93	2	0.248649
MICAL3	2	93	93	2	0.248649
PLEKHA5	0	93	93	2	0.248649
DICER1	0	93	93	2	0.248649
RPP40	2	93	93	2	0.248649
PCF11	0	93	93	2	0.248649
PTTG2	0	93	93	2	0.248649
CARD8	2	93	93	2	0.248649
SLC15A2	2	93	93	2	0.248649
KCNT2	0	93	93	2	0.248649
GGT7	0	93	93	2	0.248649
KIAA1644	2	93	93	2	0.248649
ZNF234	0	93	93	2	0.248649
PHLDA1	2	93	93	2	0.248649
WDR33	0	93	93	2	0.248649
OR7D2	0	93	93	2	0.248649
OR51G2	0	93	93	2	0.248649
TMEM132D	0	93	93	2	0.248649
GALK1	0	93	93	2	0.248649
KNDC1	0	93	93	2	0.248649
C7orf72	0	93	93	2	0.248649
BRPF1	0	93	93	2	0.248649
DACH2	2	93	93	2	0.248649
RHAG	0	93	93	2	0.248649
CNTROB	0	93	93	2	0.248649
ZNF718	0	93	93	2	0.248649
ARHGEF26	0	93	93	2	0.248649
TNS3	2	93	93	2	0.248649
POM121L12	2	93	93	2	0.248649
DARC	2	93	93	2	0.248649
ITGAL	2	93	93	2	0.248649
FANCA	0	93	93	2	0.248649
COL6A5	2	93	93	2	0.248649
EPHA5	2	93	93	2	0.248649
EBF3	2	93	93	2	0.248649
PLEKHG3	0	93	93	2	0.248649
CCDC71	0	93	93	2	0.248649
KCNH5	2	93	93	2	0.248649
KRT38	0	93	93	2	0.248649
REV1	0	93	93	2	0.248649
AKAP9	0	93	93	2	0.248649
HHLA1	0	93	93	2	0.248649
KIAA1217	2	93	93	2	0.248649
BMPER	2	93	93	2	0.248649
TAS2R39	2	93	93	2	0.248649
VEPH1	0	93	93	2	0.248649
SSR3	0	93	93	2	0.248649
GPR17	0	93	93	2	0.248649
CR1L	0	93	93	2	0.248649
PIK3C2A	2	93	93	2	0.248649
CROCC	2	93	93	2	0.248649
PTCHD1	2	93	93	2	0.248649
ARID5B	2	93	93	2	0.248649
TNPO1	2	93	93	2	0.248649
PHKB	2	93	93	2	0.248649
TGM1	2	93	93	2	0.248649
ATP4A	0	93	93	2	0.248649
RXRA	2	93	93	2	0.248649
CP	0	93	93	2	0.248649
RPE65	2	93	93	2	0.248649
DCAF12L2	2	93	93	2	0.248649
COL2A1	2	93	93	2	0.248649
SLC35C1	0	93	93	2	0.248649
ABR	2	93	93	2	0.248649
ZNF845	0	93	93	2	0.248649
PLEKHH2	2	93	93	2	0.248649
PSAP	2	93	93	2	0.248649
EPHA1	0	93	93	2	0.248649
NSMCE1	2	93	93	2	0.248649
MAGEC3	0	93	93	2	0.248649
IPO7	0	93	93	2	0.248649
CIZ1	2	93	93	2	0.248649
FOCAD	0	93	93	2	0.248649
LCE1B	0	93	93	2	0.248649
GABRQ	0	93	93	2	0.248649
UTRN	2	93	93	2	0.248649
CLSTN3	0	93	93	2	0.248649
TRIM37	2	93	93	2	0.248649
PALM2-AKAP2	2	93	93	2	0.248649
KCNK16	0	93	93	2	0.248649
SLC36A3	0	93	93	2	0.248649
DCAF12L1	2	93	93	2	0.248649
ZUFSP	2	93	93	2	0.248649
BAHCC1	2	93	93	2	0.248649
BANK1	2	93	93	2	0.248649
SIGLEC1	2	93	93	2	0.248649
WDFY3	2	93	93	2	0.248649
OR8K1	2	93	93	2	0.248649
NR1H3	0	93	93	2	0.248649
OR4M1	2	93	93	2	0.248649
MUC17	0	93	93	2	0.248649
CPA6	0	93	93	2	0.248649
ESRP2	0	93	93	2	0.248649
RTP1	0	93	93	2	0.248649
DNAH17	0	93	93	2	0.248649
PCDHB8	0	93	93	2	0.248649
TMEM200A	0	93	93	2	0.248649
GPR174	0	93	93	2	0.248649
TUBA3C	0	93	93	2	0.248649
ADAM21	2	93	93	2	0.248649
ZNF827	0	93	93	2	0.248649
N4BP1	2	93	93	2	0.248649
HOXA3	0	93	93	2	0.248649
TIGD2	0	93	93	2	0.248649
UNK	2	93	93	2	0.248649
ATRNL1	0	93	93	2	0.248649
KIAA0100	0	93	93	2	0.248649
PPP2R5B	0	93	93	2	0.248649
XPNPEP1	0	93	93	2	0.248649
PTCHD2	2	93	93	2	0.248649
SLC44A4	2	93	93	2	0.248649
ZNF578	0	93	93	2	0.248649
FUS	0	93	93	2	0.248649
PRMT6	0	93	93	2	0.248649
NALCN	2	93	93	2	0.248649
ZNF462	2	93	93	2	0.248649
SNW1	2	93	93	2	0.248649
KIAA0586	2	93	93	2	0.248649
KRAS	0	93	93	2	0.248649
DTNB	0	93	93	2	0.248649
ARHGEF33	0	93	93	2	0.248649
STOX2	0	93	93	2	0.248649
PARP4	2	93	93	2	0.248649
CEP250	2	93	93	2	0.248649
TGOLN2	0	93	93	2	0.248649
ZDHHC4	0	93	93	2	0.248649
KIAA1751	0	93	93	2	0.248649
IRX1	2	93	93	2	0.248649
NEBL	2	93	93	2	0.248649
ZBTB14	0	93	93	2	0.248649
POU3F4	2	93	93	2	0.248649
AQP5	0	93	93	2	0.248649
TYR	2	93	93	2	0.248649
CDC20B	2	93	93	2	0.248649
BAI1	2	93	93	2	0.248649
KIAA1211L	0	93	93	2	0.248649
MYO9B	0	93	93	2	0.248649
DLG4	2	93	93	2	0.248649
MSLN	0	93	93	2	0.248649
KIF26A	2	93	93	2	0.248649
PCDHGC3	2	93	93	2	0.248649
CYP2W1	2	93	93	2	0.248649
ITSN2	0	93	93	2	0.248649
AKAP3	2	93	93	2	0.248649
RASAL1	2	93	93	2	0.248649
FAM180A	2	93	93	2	0.248649
OR56B4	2	93	93	2	0.248649
STRADA	0	93	93	2	0.248649
PTPN14	0	93	93	2	0.248649
SLC26A4	0	93	93	2	0.248649
FUT9	0	93	93	2	0.248649
C2orf71	0	93	93	2	0.248649
SMPD2	2	93	93	2	0.248649
OR6K2	2	93	93	2	0.248649
FGFBP1	2	93	93	2	0.248649
BTRC	2	93	93	2	0.248649
MYO1C	2	93	93	2	0.248649
PHACTR3	0	93	93	2	0.248649
ZNF611	2	93	93	2	0.248649
STON2	0	93	93	2	0.248649
IL2RB	0	93	93	2	0.248649
GTF3C2	0	93	93	2	0.248649
KDM4C	2	93	93	2	0.248649
LRP8	0	93	93	2	0.248649
WDR49	0	93	93	2	0.248649
BPIFC	2	93	93	2	0.248649
OTOP2	2	93	93	2	0.248649
FRG1	0	93	93	2	0.248649
SLC41A3	2	93	93	2	0.248649
IFNA6	2	93	93	2	0.248649
PSMA4	2	93	93	2	0.248649
PDPR	2	93	93	2	0.248649
EP300	2	93	93	2	0.248649
CASZ1	2	93	93	2	0.248649
CCDC105	2	93	93	2	0.248649
TRPS1	0	93	93	2	0.248649
DCSTAMP	0	93	93	2	0.248649
USP34	2	93	93	2	0.248649
NT5DC1	0	93	93	2	0.248649
SLC22A15	0	93	93	2	0.248649
TNFRSF21	0	93	93	2	0.248649
RALGAPA2	2	93	93	2	0.248649
TRMT10C	2	93	93	2	0.248649
TTC13	2	93	93	2	0.248649
PSG11	2	93	93	2	0.248649
ADAMTS14	0	93	93	2	0.248649
PODNL1	2	93	93	2	0.248649
SLC12A2	0	93	93	2	0.248649
HECW1	0	93	93	2	0.248649
CEP290	2	93	93	2	0.248649
MYRF	0	93	93	2	0.248649
ANK2	2	93	93	2	0.248649
LHFPL3	0	93	93	2	0.248649
MYH10	0	93	93	2	0.248649
MED14	0	93	93	2	0.248649
ROR1	2	93	93	2	0.248649
MAGEB18	0	93	93	2	0.248649
KBTBD12	2	93	93	2	0.248649
IFNA14	2	93	93	2	0.248649
UNC13A	2	93	93	2	0.248649
CNIH2	0	93	93	2	0.248649
ERCC3	2	93	93	2	0.248649
PHEX	2	93	93	2	0.248649
SMOX	2	93	93	2	0.248649
IRF2	0	93	93	2	0.248649
BLVRA	2	93	93	2	0.248649
SPATA3	0	93	93	2	0.248649
FIGNL1	0	93	93	2	0.248649
LTK	2	93	93	2	0.248649
MAVS	0	93	93	2	0.248649
MYO18B	0	93	93	2	0.248649
IFNG	2	93	93	2	0.248649
ERI2	0	93	93	2	0.248649
CCDC129	0	93	93	2	0.248649
KRT27	2	93	93	2	0.248649
CSRP3	2	93	93	2	0.248649
MARS	2	93	93	2	0.248649
DACT1	2	93	93	2	0.248649
FGGY	2	93	93	2	0.248649
TFAP2D	2	93	93	2	0.248649
APEH	2	93	93	2	0.248649
GPR133	2	93	93	2	0.248649
GRIK4	0	93	93	2	0.248649
DST	2	93	93	2	0.248649
CCDC88C	0	93	93	2	0.248649
INTS1	0	93	93	2	0.248649
ABCB10	2	93	93	2	0.248649
SMCHD1	0	93	93	2	0.248649
F10	2	93	93	2	0.248649
TSEN34	2	93	93	2	0.248649
BRD8	0	93	93	2	0.248649
COX5A	2	93	93	2	0.248649
ATXN7L3	0	93	93	2	0.248649
LGSN	0	93	93	2	0.248649
DHRS4L1	2	93	93	2	0.248649
OR2F1	2	93	93	2	0.248649
CHPF2	2	93	93	2	0.248649
ADAMTSL3	0	93	93	2	0.248649
EVA1C	0	93	93	2	0.248649
ACAN	2	93	93	2	0.248649
AKAP1	0	93	93	2	0.248649
IDH1	2	93	93	2	0.248649
ARHGAP5	2	93	93	2	0.248649
PTPRN2	2	93	93	2	0.248649
KLHL2	0	93	93	2	0.248649
ALKBH7	0	93	93	2	0.248649
ZNF790	0	93	93	2	0.248649
MAP1A	0	93	93	2	0.248649
FILIP1	2	93	93	2	0.248649
ANKRD32	2	93	93	2	0.248649
CDH23	2	93	93	2	0.248649
OR4N5	0	93	93	2	0.248649
ROS1	2	93	93	2	0.248649
ADAM17	0	93	93	2	0.248649
SCN4A	0	93	93	2	0.248649
KCNA7	2	93	93	2	0.248649
KRTAP16-1	0	93	93	2	0.248649
PTP4A3	2	93	93	2	0.248649
DPCR1	2	93	93	2	0.248649
SPAST	0	93	93	2	0.248649
HIST1H3I	0	93	93	2	0.248649
DDX50	2	93	93	2	0.248649
VIM	0	93	93	2	0.248649
TMEM71	2	93	93	2	0.248649
CACNG4	0	93	93	2	0.248649
CCDC141	0	93	93	2	0.248649
CLEC1B	2	93	93	2	0.248649
CTR9	0	93	93	2	0.248649
ZNF479	2	93	93	2	0.248649
DGKG	0	93	93	2	0.248649
ELAVL3	0	93	93	2	0.248649
CASP8AP2	0	93	93	2	0.248649
MEI1	0	93	93	2	0.248649
KIAA1147	0	93	93	2	0.248649
NLRC5	0	93	93	2	0.248649
RANBP2	0	93	93	2	0.248649
RPTOR	0	93	93	2	0.248649
TCF7	0	93	93	2	0.248649
OR2D3	0	93	93	2	0.248649
KIF4B	0	93	93	2	0.248649
PABPC4L	2	93	93	2	0.248649
ASAH2	0	93	93	2	0.248649
DDI1	0	93	93	2	0.248649
AXIN1	0	93	93	2	0.248649
NAV2	2	93	93	2	0.248649
SLC34A2	2	93	93	2	0.248649
BMP2K	2	93	93	2	0.248649
KHDC3L	2	93	93	2	0.248649
GREB1L	0	93	93	2	0.248649
C17orf49	0	93	93	2	0.248649
LGALS9B	0	93	93	2	0.248649
ADAMTS1	0	93	93	2	0.248649
CEP192	2	93	93	2	0.248649
MTOR	0	93	93	2	0.248649
TRIM41	1	93	93	2	0.502703
SCAMP3	1	93	93	2	0.502703
HERC2	1	93	93	2	0.502703
NACAD	1	93	93	2	0.502703
UBA6	1	93	93	2	0.502703
EPHB3	1	93	93	2	0.502703
POC5	1	93	93	2	0.502703
EGFLAM	1	93	93	2	0.502703
RAB39A	1	93	93	2	0.502703
XKR4	1	93	93	2	0.502703
SARS2	1	93	93	2	0.502703
MYOM2	1	93	93	2	0.502703
LRCH3	1	93	93	2	0.502703
SLC6A3	1	93	93	2	0.502703
NRG1	1	93	93	2	0.502703
TJP1	1	93	93	2	0.502703
MAP2	1	93	93	2	0.502703
AEBP1	1	93	93	2	0.502703
PKP4	1	93	93	2	0.502703
CDH11	1	93	93	2	0.502703
ADAMTS16	1	93	93	2	0.502703
TBCCD1	1	93	93	2	0.502703
TRIM66	1	93	93	2	0.502703
ZNF223	1	93	93	2	0.502703
PCDHGA5	1	93	93	2	0.502703
ZNF17	1	93	93	2	0.502703
THEG	1	93	93	2	0.502703
HHIP	1	93	93	2	0.502703
PPP1R3F	1	93	93	2	0.502703
HK3	1	93	93	2	0.502703
CLVS2	1	93	93	2	0.502703
PRKG1	1	93	93	2	0.502703
SLITRK4	1	93	93	2	0.502703
TCEB3CL2	1	93	93	2	0.502703
FAT4	1	93	93	2	0.502703
OR8U1	1	93	93	2	0.502703
OR2T4	1	93	93	2	0.502703
GFM2	1	93	93	2	0.502703
ADAMTS19	1	93	93	2	0.502703
GHITM	1	93	93	2	0.502703
SPTAN1	1	93	93	2	0.502703
CNTNAP5	1	93	93	2	0.502703
PEX13	1	93	93	2	0.502703
MOCOS	1	93	93	2	0.502703
LAMB3	1	93	93	2	0.502703
ZNF385B	1	93	93	2	0.502703
ARHGEF28	1	93	93	2	0.502703
INSIG1	1	93	93	2	0.502703
TUBAL3	1	93	93	2	0.502703
NOV	1	93	93	2	0.502703
CACNA2D1	1	93	93	2	0.502703
BTLA	1	93	93	2	0.502703
KIAA1755	1	93	93	2	0.502703
ASIC4	1	93	93	2	0.502703
MYH11	1	93	93	2	0.502703
FAM83E	1	93	93	2	0.502703
GPR137B	1	93	93	2	0.502703
NFATC4	1	93	93	2	0.502703
P2RY1	1	93	93	2	0.502703
IQGAP2	1	93	93	2	0.502703
LRRC4C	1	93	93	2	0.502703
COL5A1	1	93	93	2	0.502703
CHRM5	1	93	93	2	0.502703
FAM160B1	1	93	93	2	0.502703
OR6B1	1	93	93	2	0.502703
SOS2	1	93	93	2	0.502703
DPY19L1	1	93	93	2	0.502703
KRT14	1	93	93	2	0.502703
ARPP21	1	93	93	2	0.502703
ZNF2	1	93	93	2	0.502703
GPR22	1	93	93	2	0.502703
UTP20	1	93	93	2	0.502703
LAMA4	1	93	93	2	0.502703
MAEL	1	93	93	2	0.502703
POU5F1B	1	93	93	2	0.502703
AGL	1	93	93	2	0.502703
ARHGAP22	1	93	93	2	0.502703
PCNT	1	93	93	2	0.502703
CPT1B	1	93	93	2	0.502703
FAM179A	1	93	93	2	0.502703
USP17L2	1	93	93	2	0.502703
PITPNM1	1	93	93	2	0.502703
SRBD1	1	93	93	2	0.502703
HSPA1L	1	93	93	2	0.502703
TAOK3	1	93	93	2	0.502703
ZNF407	1	93	93	2	0.502703
KIAA1586	1	93	93	2	0.502703
TRIM28	1	93	93	2	0.502703
CACNG2	1	93	93	2	0.502703
TPR	1	93	93	2	0.502703
PLEKHA6	1	93	93	2	0.502703
FOXK1	1	93	93	2	0.502703
ATP7A	1	93	93	2	0.502703
STIM1	1	93	93	2	0.502703
NBAS	1	93	93	2	0.502703
ABCC4	1	93	93	2	0.502703
NBPF10	1	93	93	2	0.502703
DOPEY1	1	93	93	2	0.502703
SLC27A6	1	93	93	2	0.502703
TMPRSS7	1	93	93	2	0.502703
KRT72	1	93	93	2	0.502703
PLA2G2F	1	93	93	2	0.502703
GRSF1	1	93	93	2	0.502703
STAC	1	93	93	2	0.502703
PLCL1	1	93	93	2	0.502703
SLC7A13	1	93	93	2	0.502703
KLHDC4	1	93	93	2	0.502703
ZMAT4	1	93	93	2	0.502703
JPH1	1	93	93	2	0.502703
PCDHA3	1	93	93	2	0.502703
RIN3	1	93	93	2	0.502703
NUP88	1	93	93	2	0.502703
SHANK3	1	93	93	2	0.502703
TRIM67	1	93	93	2	0.502703
USP4	1	93	93	2	0.502703
FAM171A1	1	93	93	2	0.502703
QRICH2	1	93	93	2	0.502703
RNF43	1	93	93	2	0.502703
ZNFX1	1	93	93	2	0.502703
MALT1	1	93	93	2	0.502703
HIPK2	1	93	93	2	0.502703
FER1L6	1	93	93	2	0.502703
OGN	1	93	93	2	0.502703
SPAG9	1	93	93	2	0.502703
CSPG4	1	93	93	2	0.502703
SMURF1	1	93	93	2	0.502703
PCDH11Y	1	93	93	2	0.502703
CHD5	1	93	93	2	0.502703
PHF21B	1	93	93	2	0.502703
PACS2	1	93	93	2	0.502703
MTSS1L	1	93	93	2	0.502703
GRID2IP	1	93	93	2	0.502703
ZNF256	1	93	93	2	0.502703
SUFU	1	93	93	2	0.502703
GRM1	1	93	93	2	0.502703
PDX1	1	93	93	2	0.502703
TAF3	1	93	93	2	0.502703
LCA5	1	93	93	2	0.502703
HIST1H4K	1	93	93	2	0.502703
ARL9	1	93	93	2	0.502703
KIAA0907	1	93	93	2	0.502703
LPIN2	1	93	93	2	0.502703
ZNF507	1	93	93	2	0.502703
URB2	1	93	93	2	0.502703
RGS9	1	93	93	2	0.502703
RTEL1	1	93	93	2	0.502703
LRTM1	1	93	93	2	0.502703
CACNA2D2	1	93	93	2	0.502703
NLRP5	1	93	93	2	0.502703
ARHGEF40	1	93	93	2	0.502703
TBX4	1	93	93	2	0.502703
RYR1	1	93	93	2	0.502703
FHAD1	1	93	93	2	0.502703
IRAK3	1	93	93	2	0.502703
MYBL2	1	93	93	2	0.502703
PARP11	1	93	93	2	0.502703
MC5R	1	93	93	2	0.502703
CTSK	1	93	93	2	0.502703
ARL5B	1	93	93	2	0.502703
HECTD1	1	93	93	2	0.502703
PRF1	1	93	93	2	0.502703
ATG2B	1	93	93	2	0.502703
NRXN1	1	93	93	2	0.502703
MYO3B	1	93	93	2	0.502703
C10orf12	1	93	93	2	0.502703
ZNF687	1	93	93	2	0.502703
GLRA4	1	93	93	2	0.502703
GALNT8	1	93	93	2	0.502703
NOTCH4	1	93	93	2	0.502703
NETO1	1	93	93	2	0.502703
SFPQ	1	93	93	2	0.502703
C9orf84	1	93	93	2	0.502703
FNIP2	1	93	93	2	0.502703
SMC4	1	93	93	2	0.502703
RHBDL3	1	93	93	2	0.502703
GPR113	1	93	93	2	0.502703
APC	1	93	93	2	0.502703
PDLIM2	1	93	93	2	0.502703
LRFN5	1	93	93	2	0.502703
TTC17	1	93	93	2	0.502703
SYT10	1	93	93	2	0.502703
ARHGEF6	1	93	93	2	0.502703
DHTKD1	1	93	93	2	0.502703
MRC2	1	93	93	2	0.502703
UGGT1	1	93	93	2	0.502703
ADAMTS9	1	93	93	2	0.502703
KCNIP2	1	93	93	2	0.502703
AGPAT3	1	93	93	2	0.502703
FCRL5	1	93	93	2	0.502703
HSPB2	1	93	93	2	0.502703
CTCF	1	93	93	2	0.502703
TEP1	1	93	93	2	0.502703
HACL1	1	93	93	2	0.502703
LYST	1	93	93	2	0.502703
SLITRK3	1	93	93	2	0.502703
TUBGCP5	1	93	93	2	0.502703
RBM47	1	93	93	2	0.502703
KIF15	1	93	93	2	0.502703
TEKT3	1	93	93	2	0.502703
FSIP2	1	93	93	2	0.502703
AKAP11	1	93	93	2	0.502703
ABCB1	1	93	93	2	0.502703
STAG1	1	93	93	2	0.502703
YIPF1	1	93	93	2	0.502703
HK2	1	93	93	2	0.502703
MSTN	1	93	93	2	0.502703
TYW1	1	93	93	2	0.502703
LMBRD2	1	93	93	2	0.502703
KRT79	1	93	93	2	0.502703
PMVK	1	93	93	2	0.502703
FLRT2	1	93	93	2	0.502703
KIAA1324L	1	93	93	2	0.502703
UBP1	1	93	93	2	0.502703
JAK3	1	93	93	2	0.502703
IPP	1	93	93	2	0.502703
TARSL2	1	93	93	2	0.502703
PLXND1	1	93	93	2	0.502703
CCDC136	1	93	93	2	0.502703
CHD2	1	93	93	2	0.502703
PDE6A	1	93	93	2	0.502703
TEX2	1	93	93	2	0.502703
ZNF681	1	93	93	2	0.502703
SORT1	1	93	93	2	0.502703
OSBPL10	1	93	93	2	0.502703
TTC3	1	93	93	2	0.502703
CR2	1	93	93	2	0.502703
SPHKAP	1	93	93	2	0.502703
USP1	1	93	93	2	0.502703
POM121L2	1	93	93	2	0.502703
CNKSR2	1	93	93	2	0.502703
NIPBL	1	93	93	2	0.502703
CDKN1A	1	93	93	2	0.502703
DCAF5	1	93	93	2	0.502703
HPGD	1	93	93	2	0.502703
TET3	1	93	93	2	0.502703
OR4Q3	1	93	93	2	0.502703
PHTF2	1	93	93	2	0.502703
EIF4E1B	1	93	93	2	0.502703
WNT1	1	93	93	2	0.502703
NAGA	1	93	93	2	0.502703
PCDH18	1	93	93	2	0.502703
RAI2	1	93	93	2	0.502703
INADL	1	93	93	2	0.502703
METTL1	1	93	93	2	0.502703
TCF7L2	1	93	93	2	0.502703
PRRC2B	1	93	93	2	0.502703
KIR2DL3	1	93	93	2	0.502703
ZNF835	1	93	93	2	0.502703
BZRAP1	1	93	93	2	0.502703
CDK9	1	93	93	2	0.502703
NAV1	1	93	93	2	0.502703
PCDHGA3	1	93	93	2	0.502703
PDCD7	1	93	93	2	0.502703
COL19A1	1	93	93	2	0.502703
VEGFC	1	93	93	2	0.502703
ZNF678	1	93	93	2	0.502703
OR6Y1	1	93	93	2	0.502703
PLXNA2	1	93	93	2	0.502703
DCX	1	93	93	2	0.502703
FPGT-TNNI3K	1	93	93	2	0.502703
PRPF4B	1	93	93	2	0.502703
RALGAPA1	1	93	93	2	0.502703
UBR1	1	93	93	2	0.502703
OAS2	1	93	93	2	0.502703
PRL	1	93	93	2	0.502703
PYHIN1	1	93	93	2	0.502703
PIK3CG	1	93	93	2	0.502703
DPYD	1	93	93	2	0.502703
CHADL	1	93	93	2	0.502703
USP40	1	93	93	2	0.502703
CRY1	1	93	93	2	0.502703
ADAM8	1	93	93	2	0.502703
GRIA3	1	93	93	2	0.502703
AP2B1	1	93	93	2	0.502703
DACH1	1	93	93	2	0.502703
CHAT	1	93	93	2	0.502703
ADAM18	1	93	93	2	0.502703
TRPM6	1	93	93	2	0.502703
MAP3K4	1	93	93	2	0.502703
PION	1	93	93	2	0.502703
BCL3	1	93	93	2	0.502703
RARG	1	93	93	2	0.502703
OPN4	1	93	93	2	0.502703
FN1	1	93	93	2	0.502703
RP1L1	1	93	93	2	0.502703
IFNA4	1	93	93	2	0.502703
NOX3	1	93	93	2	0.502703
ASCC3	1	93	93	2	0.502703
POTEH	1	93	93	2	0.502703
TICAM1	1	93	93	2	0.502703
GPAM	1	93	93	2	0.502703
SLITRK6	1	93	93	2	0.502703
PALMD	1	93	93	2	0.502703
PLA2R1	1	93	93	2	0.502703
TOPORS	1	93	93	2	0.502703
SYNPO2	1	93	93	2	0.502703
MYO15A	1	93	93	2	0.502703
PLIN4	1	93	93	2	0.502703
PLD3	1	93	93	2	0.502703
TMF1	1	93	93	2	0.502703
SLC13A3	1	93	93	2	0.502703
B4GALT3	1	93	93	2	0.502703
KRTAP5-1	1	93	93	2	0.502703
TCAIM	1	93	93	2	0.502703
GNB5	1	93	93	2	0.502703
PARM1	1	93	93	2	0.502703
BMP5	1	93	93	2	0.502703
PRICKLE2	1	93	93	2	0.502703
CELF3	1	93	93	2	0.502703
FBF1	1	93	93	2	0.502703
RLIM	1	93	93	2	0.502703
PHKA1	1	93	93	2	0.502703
NUP133	1	93	93	2	0.502703
OPLAH	1	93	93	2	0.502703
BRIX1	1	93	93	2	0.502703
LCK	1	93	93	2	0.502703
LRRIQ3	1	93	93	2	0.502703
FLT1	1	93	93	2	0.502703
ERCC4	1	93	93	2	0.502703
PDS5A	1	93	93	2	0.502703
GAB4	1	93	93	2	0.502703
DVL2	1	93	93	2	0.502703
TMEM14C	1	93	93	2	0.502703
MEIS2	1	93	93	2	0.502703
KCNAB1	1	93	93	2	0.502703
C11orf16	1	93	93	2	0.502703
TMPRSS11D	1	93	93	2	0.502703
TNC	1	93	93	2	0.502703
TBL3	1	93	93	2	0.502703
FLNC	1	93	93	2	0.502703
AXIN2	1	93	93	2	0.502703
C10orf113	1	93	93	2	0.502703
ZNF286A	1	93	93	2	0.502703
BOC	1	93	93	2	0.502703
SLC1A6	1	93	93	2	0.502703
DCN	1	93	93	2	0.502703
STAT5A	1	93	93	2	0.502703
SLC4A10	1	93	93	2	0.502703
NPSR1	1	93	93	2	0.502703
SARDH	1	93	93	2	0.502703
PCDH17	1	93	93	2	0.502703
RAB3IP	1	93	93	2	0.502703
TRMT10B	1	93	93	2	0.502703
NID2	1	93	93	2	0.502703
ZFC3H1	1	93	93	2	0.502703
SUPT6H	1	93	93	2	0.502703
BHLHB9	1	93	93	2	0.502703
ZNF236	1	93	93	2	0.502703
SLC38A10	1	93	93	2	0.502703
PEAK1	1	93	93	2	0.502703
PARG	1	93	93	2	0.502703
RBL2	1	93	93	2	0.502703
CCT4	1	93	93	2	0.502703
LYAR	1	93	93	2	0.502703
HOXA6	1	93	93	2	0.502703
UNC45B	1	93	93	2	0.502703
SYNGAP1	1	93	93	2	0.502703
SOS1	1	93	93	2	0.502703
CAPZA1	1	93	93	2	0.502703
KCNK10	1	93	93	2	0.502703
SCN7A	1	93	93	2	0.502703
KANK1	1	93	93	2	0.502703
ARHGAP44	1	93	93	2	0.502703
PIWIL4	1	93	93	2	0.502703
ARFGEF1	1	93	93	2	0.502703
HIST1H3D	1	93	93	2	0.502703
SLC12A7	1	93	93	2	0.502703
OR51T1	1	93	93	2	0.502703
ZNF141	1	93	93	2	0.502703
IVL	1	93	93	2	0.502703
MBTPS1	1	93	93	2	0.502703
PSTPIP1	1	93	93	2	0.502703
SOLH	1	93	93	2	0.502703
PSD4	1	93	93	2	0.502703
PIWIL1	1	93	93	2	0.502703
SRRM4	1	93	93	2	0.502703
MTO1	1	93	93	2	0.502703
PFKFB1	1	93	93	2	0.502703
METTL2B	1	93	93	2	0.502703
IWS1	1	93	93	2	0.502703
PCDH10	1	93	93	2	0.502703
MAST3	1	93	93	2	0.502703
MBOAT1	1	93	93	2	0.502703
C2orf62	1	93	93	2	0.502703
BCAR1	1	93	93	2	0.502703
CPT1C	1	93	93	2	0.502703
NSD1	1	93	93	2	0.502703
VAV1	1	93	93	2	0.502703
CYP3A5	1	93	93	2	0.502703
ZKSCAN7	1	93	93	2	0.502703
HNRNPA2B1	1	93	93	2	0.502703
ADORA3	1	93	93	2	0.502703
NRDE2	1	93	93	2	0.502703
GABBR1	1	93	93	2	0.502703
FAF1	1	93	93	2	0.502703
PRDM16	1	93	93	2	0.502703
AUP1	1	93	93	2	0.502703
KPRP	1	93	93	2	0.502703
RNASET2	1	93	93	2	0.502703
ARHGEF18	1	93	93	2	0.502703
NPAS3	1	93	93	2	0.502703
CCR6	1	93	93	2	0.502703
NUP188	1	93	93	2	0.502703
L1CAM	1	93	93	2	0.502703
RECQL4	1	93	93	2	0.502703
DHX9	1	93	93	2	0.502703
FANCM	1	93	93	2	0.502703
TMEM181	1	93	93	2	0.502703
PTRF	1	93	93	2	0.502703
HIF3A	1	93	93	2	0.502703
IMPG1	1	93	93	2	0.502703
CPA5	1	93	93	2	0.502703
KIF1B	1	93	93	2	0.502703
GK2	1	93	93	2	0.502703
TMC3	1	93	93	2	0.502703
FAM13C	1	93	93	2	0.502703
CHRM2	1	93	93	2	0.502703
SOCS6	1	93	93	2	0.502703
NOX1	1	93	93	2	0.502703
ZNF512B	1	93	93	2	0.502703
TRAK2	1	93	93	2	0.502703
ABCG2	1	93	93	2	0.502703
EXO1	1	93	93	2	0.502703
C1orf43	1	93	93	2	0.502703
CORIN	1	93	93	2	0.502703
ZNF708	1	93	93	2	0.502703
OR2B11	1	93	93	2	0.502703
NCOA1	1	93	93	2	0.502703
SLC30A8	1	93	93	2	0.502703
SOWAHB	1	93	93	2	0.502703
ZDHHC13	1	93	93	2	0.502703
AGO3	1	93	93	2	0.502703
FAM111B	1	93	93	2	0.502703
MAGEC1	1	93	93	2	0.502703
GABRA5	1	93	93	2	0.502703
BTBD18	1	93	93	2	0.502703
SOX30	1	93	93	2	0.502703
ARHGEF10L	1	93	93	2	0.502703
CSNK1E	1	93	93	2	0.502703
KRT31	1	93	93	2	0.502703
FAM161B	1	93	93	2	0.502703
AOAH	1	93	93	2	0.502703
ZFAT	1	93	93	2	0.502703
GPR82	1	93	93	2	0.502703
FAM227B	1	93	93	2	0.502703
TBC1D26	1	93	93	2	0.502703
SLC6A5	1	93	93	2	0.502703
SNX18	1	93	93	2	0.502703
SPOCK3	1	93	93	2	0.502703
GPR116	1	93	93	2	0.502703
NUP205	1	93	93	2	0.502703
ARHGEF7	1	93	93	2	0.502703
CC2D1A	1	93	93	2	0.502703
KIAA0146	1	93	93	2	0.502703
ESYT1	1	93	93	2	0.502703
TSPEAR	1	93	93	2	0.502703
OR10K1	1	93	93	2	0.502703
ADARB2	1	93	93	2	0.502703
GH2	1	93	93	2	0.502703
ASCC2	1	93	93	2	0.502703
LRRC46	1	93	93	2	0.502703
ADAMTSL5	1	93	93	2	0.502703
CLASP1	1	93	93	2	0.502703
TCEANC2	1	93	93	2	0.502703
KIF18A	1	93	93	2	0.502703
CDC42	1	93	93	2	0.502703
RFPL2	1	93	93	2	0.502703
ACTN2	1	93	93	2	0.502703
KHSRP	1	93	93	2	0.502703
L3MBTL1	1	93	93	2	0.502703
NFE2L2	1	93	93	2	0.502703
GGA2	1	93	93	2	0.502703
WFDC3	1	93	93	2	0.502703
TLE3	1	93	93	2	0.502703
COL16A1	1	93	93	2	0.502703
LRRC56	1	93	93	2	0.502703
SEC23B	1	93	93	2	0.502703
TMTC2	1	93	93	2	0.502703
LAPTM5	1	93	93	2	0.502703
KRT85	1	93	93	2	0.502703
TSHZ2	1	93	93	2	0.502703
SOGA2	1	93	93	2	0.502703
CAND2	1	93	93	2	0.502703
ELF1	1	93	93	2	0.502703
POTEJ	1	93	93	2	0.502703
SLIT1	1	93	93	2	0.502703
MCM7	1	93	93	2	0.502703
BCL11A	1	93	93	2	0.502703
PCK1	1	93	93	2	0.502703
ANK1	1	93	93	2	0.502703
HSPA6	1	93	93	2	0.502703
WDR27	1	93	93	2	0.502703
SNAP91	1	93	93	2	0.502703
PCDHGB2	1	93	93	2	0.502703
LIMK2	1	93	93	2	0.502703
ZNF334	1	93	93	2	0.502703
ZNF710	1	93	93	2	0.502703
DPP10	1	93	93	2	0.502703
SUOX	1	93	93	2	0.502703
MFN1	1	93	93	2	0.502703
ARHGAP20	1	93	93	2	0.502703
VPS33A	1	93	93	2	0.502703
ZNF445	1	93	93	2	0.502703
NF2	1	93	93	2	0.502703
SIRPB1	1	93	93	2	0.502703
SFI1	1	93	93	2	0.502703
DCAF4L2	1	93	93	2	0.502703
SCRIB	1	93	93	2	0.502703
ZC3H11A	1	93	93	2	0.502703
OR2G2	1	93	93	2	0.502703
ANKRD18B	1	93	93	2	0.502703
PHF8	1	93	93	2	0.502703
DCDC2	1	93	93	2	0.502703
SLC44A5	1	93	93	2	0.502703
IL1RAPL1	1	93	93	2	0.502703
NCLN	1	93	93	2	0.502703
LINGO2	1	93	93	2	0.502703
PRKRIR	1	93	93	2	0.502703
ENPP6	1	93	93	2	0.502703
GABRA4	1	93	93	2	0.502703
SFMBT2	1	93	93	2	0.502703
CNGA3	1	93	93	2	0.502703
NET1	1	93	93	2	0.502703
SLC9A9	1	93	93	2	0.502703
MEF2A	1	93	93	2	0.502703
LCP1	1	93	93	2	0.502703
GPR161	1	93	93	2	0.502703
CHST2	1	93	93	2	0.502703
CNOT4	1	93	93	2	0.502703
COL5A3	1	93	93	2	0.502703
WDR66	1	93	93	2	0.502703
NELFB	1	93	93	2	0.502703
STEAP1B	1	93	93	2	0.502703
GABRA1	1	93	93	2	0.502703
RNF216	1	93	93	2	0.502703
FZD10	1	93	93	2	0.502703
NLRP9	1	93	93	2	0.502703
ZNF646	1	93	93	2	0.502703
SLC25A24	1	93	93	2	0.502703
RASSF10	1	93	93	2	0.502703
MAPK7	1	93	93	2	0.502703
SEMA5B	1	93	93	2	0.502703
CD69	1	93	93	2	0.502703
RGS18	1	93	93	2	0.502703
MPDZ	1	93	93	2	0.502703
RAPGEF5	1	93	93	2	0.502703
ACR	1	93	93	2	0.502703
ZNF700	1	93	93	2	0.502703
KRT34	1	93	93	2	0.502703
ZFYVE26	1	93	93	2	0.502703
NEU2	1	93	93	2	0.502703
C3orf30	1	93	93	2	0.502703
ACTR1B	1	93	93	2	0.502703
SLC18A2	1	93	93	2	0.502703
PPT2	1	93	93	2	0.502703
NEFH	1	93	93	2	0.502703
LRRC38	1	93	93	2	0.502703
COL14A1	1	93	93	2	0.502703
RGS12	1	93	93	2	0.502703
ZBED2	1	93	93	2	0.502703
SYT16	1	93	93	2	0.502703
MERTK	1	93	93	2	0.502703
XPO4	1	93	93	2	0.502703
UGT2B28	1	93	93	2	0.502703
SPTBN2	1	93	93	2	0.502703
PDZD2	1	93	93	2	0.502703
OR5D18	1	93	93	2	0.502703
COMMD3	1	93	93	2	0.502703
PKP1	1	93	93	2	0.502703
ADAMDEC1	1	93	93	2	0.502703
CLPTM1L	1	93	93	2	0.502703
PLA2G4C	1	93	93	2	0.502703
KSR1	1	93	93	2	0.502703
HDLBP	1	93	93	2	0.502703
FANCD2	1	93	93	2	0.502703
GLB1L3	1	93	93	2	0.502703
TNRC18	1	93	93	2	0.502703
ZC3H12C	1	93	93	2	0.502703
MTMR4	1	93	93	2	0.502703
ANXA13	1	93	93	2	0.502703
ADSS	1	93	93	2	0.502703
IGFN1	1	93	93	2	0.502703
NELFE	1	93	93	2	0.502703
SPATA18	1	93	93	2	0.502703
GRM2	1	93	93	2	0.502703
ECE2	1	93	93	2	0.502703
TMCC1	1	93	93	2	0.502703
CIC	1	93	93	2	0.502703
VPS13B	1	93	93	2	0.502703
STXBP4	1	93	93	2	0.502703
ASTL	1	93	93	2	0.502703
MEGF8	1	93	93	2	0.502703
MUC6	1	93	93	2	0.502703
UMODL1	1	93	93	2	0.502703
F8	1	93	93	2	0.502703
ABCC11	1	93	93	2	0.502703
TTC27	1	93	93	2	0.502703
LMBRD1	1	93	93	2	0.502703
CEP152	1	93	93	2	0.502703
KCNA3	1	93	93	2	0.502703
LRRC6	1	93	93	2	0.502703
ZNF804A	1	93	93	2	0.502703
PBRM1	1	93	93	2	0.502703
MMP15	1	93	93	2	0.502703
LMTK2	1	93	93	2	0.502703
NUP214	1	93	93	2	0.502703
ATXN1	1	93	93	2	0.502703
CRLF1	1	93	93	2	0.502703
EXD3	1	93	93	2	0.502703
ALS2CL	1	93	93	2	0.502703
PLCE1	1	93	93	2	0.502703
PEG3	1	93	93	2	0.502703
PAX3	1	93	93	2	0.502703
EDNRA	1	93	93	2	0.502703
BRCA2	1	93	93	2	0.502703
IGLL5	1	93	93	1	0.5
SLC10A4	1	93	93	1	0.5
EGFL6	0	93	93	1	0.5
ISLR2	1	93	93	1	0.5
PHF10	1	93	93	1	0.5
PCDH7	0	93	93	1	0.5
ELSPBP1	0	93	93	1	0.5
ZYG11B	1	93	93	1	0.5
LRRC45	0	93	93	1	0.5
GMEB2	0	93	93	1	0.5
PRAM1	1	93	93	1	0.5
FAM47C	0	93	93	1	0.5
SHROOM1	1	93	93	1	0.5
CCDC125	0	93	93	1	0.5
LUZP4	0	93	93	1	0.5
UBE2D3	1	93	93	1	0.5
LAMC3	0	93	93	1	0.5
ZNF185	1	93	93	1	0.5
SYNDIG1L	1	93	93	1	0.5
POLR2I	0	93	93	1	0.5
GUCA2B	0	93	93	1	0.5
TRPV2	0	93	93	1	0.5
GLO1	1	93	93	1	0.5
SH3RF3	0	93	93	1	0.5
MX2	1	93	93	1	0.5
USHBP1	1	93	93	1	0.5
MYH1	1	93	93	1	0.5
PLEKHM1	0	93	93	1	0.5
FAM58A	1	93	93	1	0.5
EPN3	0	93	93	1	0.5
SLC5A7	0	93	93	1	0.5
KIAA1257	0	93	93	1	0.5
AGBL5	0	93	93	1	0.5
RARA	1	93	93	1	0.5
ZNF354C	0	93	93	1	0.5
RNF133	0	93	93	1	0.5
STAT4	0	93	93	1	0.5
GLTSCR2	0	93	93	1	0.5
WEE2	1	93	93	1	0.5
OR6N2	1	93	93	1	0.5
SFRP2	0	93	93	1	0.5
C2orf42	0	93	93	1	0.5
HPS1	0	93	93	1	0.5
PDZD9	1	93	93	1	0.5
AP3D1	0	93	93	1	0.5
RAD23B	0	93	93	1	0.5
VAX2	1	93	93	1	0.5
ADAMTS12	1	93	93	1	0.5
ATP11B	0	93	93	1	0.5
CAMTA2	1	93	93	1	0.5
RGS20	1	93	93	1	0.5
CCR1	0	93	93	1	0.5
ATP5J2-PTCD1	0	93	93	1	0.5
ZNF431	1	93	93	1	0.5
PRR12	0	93	93	1	0.5
RANGAP1	0	93	93	1	0.5
ZNF33A	1	93	93	1	0.5
TXNDC16	1	93	93	1	0.5
FTCD	1	93	93	1	0.5
ZNF532	1	93	93	1	0.5
RPP30	0	93	93	1	0.5
C6orf15	1	93	93	1	0.5
TGFA	1	93	93	1	0.5
TINAG	0	93	93	1	0.5
ARHGAP17	0	93	93	1	0.5
FAM83B	1	93	93	1	0.5
FNDC3B	1	93	93	1	0.5
GLTSCR1	1	93	93	1	0.5
NEK4	0	93	93	1	0.5
EXTL1	1	93	93	1	0.5
CDH12	0	93	93	1	0.5
C19orf10	0	93	93	1	0.5
KCNG2	0	93	93	1	0.5
FAM213B	0	93	93	1	0.5
LMF1	0	93	93	1	0.5
ANKDD1A	0	93	93	1	0.5
[truncated: 4,372 more rows]
