# Supplementary material for: A human-specific switch of alternatively spliced AFMID isoforms contributes to TP53 mutations and tumor recurrence in hepatocellular carcinoma
Source: HighWire-hosted journal article supplement (doi:10.1101/gr.227181.117), 2018-02-15
Supplement: Supplemental_Table_S8.xlsx [file Supplemental_Table_S8.xlsx]

## Sheet: Table S8
Table S8. Primers
Target	Primer sequences
AFMID total Forward (Exon 3)	5’-GGCCACCAGGAAGAGCCTGC-3’
AFMID total Reverse (Exon 4)	5’-CCGCTCTGCCAGTATCCTCCGTG-3’
AFMID FL Forward (Exon 7)	5’-CCTGTGTGGACACTCAGCCG-3’
AFMID FL Reverse (Exon 8)	5’-GGTCAAAGACCCCACTCACCAGG-3’
AFMID e6 Forward (Exon 3)	5’-GGCCACCAGGAAGAGCCTGC-3’
AFMID e6 Reverse (Exon 4&6 junction)	5’-CCAGGGTGCCTTCCGCTCTGC-3’
AFMID skip Forward (Exon 3)	5’-GGCCACCAGGAAGAGCCTGC-3’
AFMID skip Reverse (Exon 4&10 junction)	5’-GACACAGGGTCTTCCGCTCTGCC-3’
HPRT Forward	5'-TGACCAGTCAACAGGGGACA-3'
HPRT Reverse	5'-TGCCTGACCAAGGAAAGCAA-3'
